# Supplementary material for: Copper/ruthenium relay catalysis enables 1,6-double chiral inductions with stereodivergence
Source: Royal Society of Chemistry journal article supplement (doi:10.1039/d4sc01804d), 2024-01-01
Supplement: d4sc01804d1.pdf [file d4sc01804d1.pdf]

Electronic Supplementary Information

## Copper/Ruthenium Relay Catalysis Enables 1,6-Double Chiral Inductions with Stereodivergence

Hao-Ran Yang,<sup>1</sup> Xiang Cheng,<sup>1</sup> Xin Chang,<sup>1</sup> Zuo-Fei Wang,<sup>1</sup> Xiu-Qin Dong,<sup>1\*</sup> and Chun-Jiang Wang<sup>1,2\*</sup>

<sup>1</sup>College of Chemistry and Molecular Sciences, Wuhan University, Wuhan 430072, China; <sup>2</sup>State Key Laboratory of Elemento-organic Chemistry, Nankai University, Tianjin, 300071, China

E-mail: xiuqindong@whu.edu.cn (X.Q.D.); cjwang@whu.edu.cn (C.J.W.)

### Content

|                                                                                                                                                              |    |
|--------------------------------------------------------------------------------------------------------------------------------------------------------------|----|
| 1. General remarks .....                                                                                                                                     | 2  |
| 2. Preparation of racemic 1,3-dienyl carbinols and 1,3,5-trienyl carbinols .....                                                                             | 3  |
| 3. Typical procedure for stereodivergent synthesis of chiral $\zeta$ -hydroxy amino ester... 11                                                              |    |
| 4. Optimization of reaction conditions .....                                                                                                                 | 12 |
| 5. Characterization data for the products .....                                                                                                              | 15 |
| 6. Scale-up experiments and synthetic transformations.....                                                                                                   | 70 |
| 7. Kinetic resolution studies.....                                                                                                                           | 78 |
| 8. X-ray structures of (2 <i>R</i> ,7 <i>S</i> , <i>E</i> )- <i>trans</i> - <b>10</b> and (2 <i>R</i> ,7 <i>R</i> , <i>E</i> )- <i>cis</i> - <b>10</b> ..... | 81 |
| 9. References.....                                                                                                                                           | 83 |
| 10. NMR spectra .....                                                                                                                                        | 84 |

## 1. General remarks

<sup>1</sup>H NMR spectra were recorded on a Bruker 400 MHz spectrometer in CDCl<sub>3</sub>. Chemical shifts are reported in ppm with the internal TMS signal at 0.0 ppm as a standard. <sup>13</sup>C NMR spectra were recorded on a Bruker 101 MHz spectrometer in CDCl<sub>3</sub>. Chemical shifts are reported in ppm with the internal chloroform signal at 77.0 ppm as a standard. <sup>19</sup>F NMR spectra were recorded on a Bruker 376 MHz spectrometer in CDCl<sub>3</sub>. Chemical shifts are reported in ppm with the internal CF<sub>3</sub>COOH signal at -76.55 ppm. The data are reported as (s = single, d = double, t = triple, q = quarter, m = multiple or unresolved, br s = broad single, coupling constant(s) in Hz, integration). High resolution mass spectra (HR-MS) were recorded on a LTQ-Orbitrap Elite mass spectrometer with MeOH as solvent mixture for the measurements. Commercially obtained reagents were used without further purification. Solvents were purified prior to use according to the standard methods. Unless otherwise noted, all reactions were carried out under argon atmosphere. The enantiomeric excesses (ee) and diastereomeric ratio (dr) of the products were determined by high-performance liquid chromatography (HPLC) analysis performed on Agilent 1200 and 1260 Series chromatographs using a Diacel chiral column (25 cm). Optical rotations were measured on a Rudolph Research Analytical Autopol VI polarimeter with [ $\alpha$ ]<sub>D</sub> values reported in degrees; concentration (c) is in g/100 mL. The racemic products were obtained by running reactions with racemic [Ru]-catalyst and racemic ligand. The chiral catalyst [Ru]-**1**<sup>1</sup> and [Ru]-**2**<sup>1</sup> and known chiral ligands **L1**<sup>2</sup>, **L5-L9**<sup>2</sup> and ligand **L2**<sup>3</sup> and ligands **L4**,<sup>4</sup> **L10-L11**<sup>4</sup> were prepared according to the literature procedure. Commercially available chiral ligands (**L3**) were purchased and used without further purification. Diphenyl ketimine esters **1**, racemic 1,3-dienyl carbinols **2**<sup>5</sup> and 1,3,5-trienyl carbinols **4**<sup>6</sup> were prepared according to the literature procedure. The absolute configuration of (2*R*,7*S*,*E*)-*trans*-**10** and (2*R*,7*R*,*E*)-*cis*-**10** was determined by X-ray analysis, and those of other *trans*- and *cis*-products were deduced on the basis of these results.

## 2. Preparation of racemic 1,3-dienyl carbinols and 1,3,5-trienyl carbinols

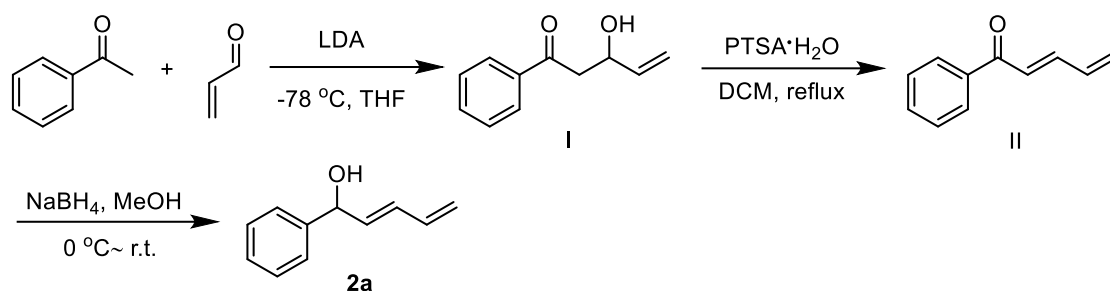

To a stirred solution of *i*-Pr<sub>2</sub>NH (33 mmol, 1.1 eq.) in dry THF (33 mL), was add *n*-BuLi (33 mmol, 2.5 M in hexane, 1.1 eq.) dropwise at  $-78\text{ }^{\circ}\text{C}$ . The mixture was stirred for 30 min at the same temperature then acetophenone (30 mmol, 1.0 eq.) in THF (10 mL) was added to the generated LDA solution at  $-78\text{ }^{\circ}\text{C}$  and the reaction was allowed to stir for 30 min. A solution of acrolein in THF (10 mL) was added and the mixture was stirred for 1 h. The reaction was quenched with sat. aq. NH<sub>4</sub>Cl solution when the starting material was completely consumed. The organic layer was separated and the aqueous layer was extracted with EtOAc ( $2 \times 30\text{ mL}$ ). The combined organic layers were dried over Na<sub>2</sub>SO<sub>4</sub> and concentrated. The alcohol product **I** was isolated via silica gel column chromatography as a yellow liquid in 75% yield.

To a solution of **I** (22 mmol, 1.0 eq.) in DCM (44 mL) at room temperature was added PTSA (11 mmol, 0.5 eq.). The reaction system was heated to  $40\text{ }^{\circ}\text{C}$  and refluxed for 3 h. The mixture was diluted with DCM and washed with water ( $2 \times 40\text{ mL}$ ). Dried organic layer was evaporated. The product **II** was isolated via silica gel column chromatography as a yellow liquid in 80% yield.

To a stirred solution of **II** (17.6 mmol, 1.0 eq.) in MeOH (40 mL), was added CeCl<sub>3</sub>·7H<sub>2</sub>O. The mixture was cooled to  $0\text{ }^{\circ}\text{C}$  and NaBH<sub>4</sub> was added slowly at  $0\text{ }^{\circ}\text{C}$ . After stirring for 1 h, the reaction was quenched with H<sub>2</sub>O and MeOH was removed in vacuo. The mixture was extracted with EtOAc ( $3 \times 40\text{ mL}$ ). The combined organic layer was dried over Na<sub>2</sub>SO<sub>4</sub> and concentrated. The substrate **2a** was isolated via silica gel column chromatography as a yellow liquid in 90% yield.

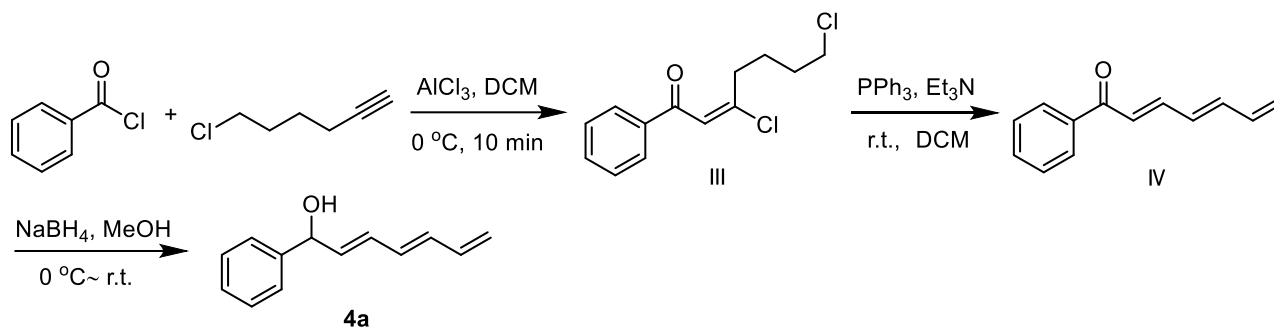

Under Argon, to a suspension of  $\text{AlCl}_3$  (33 mmol, 1.1 eq.) in dry DCM (30 mL) was added benzoyl chloride (30 mmol, 1.0 eq.) in DCM (10 mL) and 6-chloro-1-hexyne (30 mmol, 1.0 eq.) in DCM (10 mL) simultaneously at 0 °C. The reaction was quenched by  $\text{H}_2\text{O}$  after 15 min. The organic layer was separated and the aqueous layer was extracted with EtOAc ( $2 \times 30$  mL). The combined organic layers were dried over  $\text{Na}_2\text{SO}_4$  and concentrated. The product **III** was isolated via silica gel column chromatography as a yellow liquid in 65% yield.

A dry flask was charged with **III** (5 mmol, 1.0 eq.) and  $\text{PPh}_3$  (0.5 mmol, 0.1 eq.) under argon. To this flask was added dry DCM (10 mL) followed by  $\text{Et}_3\text{N}$  (1.5 mmol, 1.5 eq.) at room temperature. The mixture was continued to stir until reaction was completed. The reaction was quenched with  $\text{H}_2\text{O}$  (10 mL), extracted with DCM ( $3 \times 10$  mL), and dried with  $\text{Na}_2\text{SO}_4$ . The product **IV** was isolated via silica gel column chromatography as a yellow liquid in 30% yield.

**4a** was synthesized from **IV** in the same method as that used for the substrate **2a** from **II**.

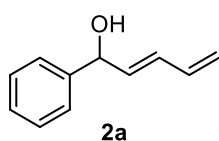

**(E)-1-phenylpenta-2,4-dien-1-ol (2a)**: colorless liquid.

$^1\text{H}$  NMR (400 MHz, Chloroform-*d*)  $\delta$  7.33 – 7.27 (m, 4H), 7.24 – 7.20 (m, 1H), 6.33 – 6.22 (m, 2H), 5.89 – 5.77 (m, 1H), 5.23 – 5.15 (m, 2H), 5.09 – 5.02 (m, 1H).

$^{13}\text{C}$  NMR (101 MHz, Chloroform-*d*)  $\delta$  142.7, 136.2, 135.5, 131.3, 128.6, 127.8, 126.3, 118.1, 74.7.

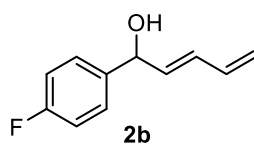

**(E)-1-(4-fluorophenyl)penta-2,4-dien-1-ol (2b):** colorless liquid.

<sup>1</sup>H NMR (400 MHz, Chloroform-*d*) δ 7.29 – 7.22 (m, 2H), 6.99 – 6.92 (m, 2H), 6.32 – 6.16 (m, 2H), 5.84 – 5.69 (m, 1H), 5.22 – 5.13 (m, 2H), 5.09 – 5.03 (m, 1H), 2.05 (brs, 1H).

<sup>13</sup>C NMR (101 MHz, Chloroform-*d*) δ 162.3 (d, *J* = 246.7 Hz), 138.4 (d, *J* = 3.4 Hz), 136.0, 135.2, 131.5, 128.0 (d, *J* = 8.3 Hz), 118.4, 115.4 (d, *J* = 21.3 Hz), 74.0.

<sup>19</sup>F NMR (376 MHz, Chloroform-*d*) -114.76 – -114.78 (m).

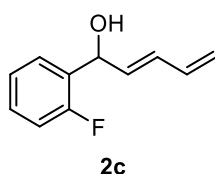

**(E)-1-(2-fluorophenyl)penta-2,4-dien-1-ol (2c):** colorless liquid.

<sup>1</sup>H NMR (400 MHz, Chloroform-*d*) δ 7.51 – 7.41 (m, 1H), 7.30 – 7.26 (m, 1H), 7.20 – 7.12 (m, 1H), 7.09 – 6.98 (m, 1H), 6.41 – 6.25 (m, 2H), 5.97 – 5.84 (m, 1H), 5.62 – 5.51 (m, 1H), 5.30 – 5.21 (m, 1H), 5.17 – 5.09 (m, 1H), 2.10 (brs, 1H).

<sup>13</sup>C NMR (101 MHz, Chloroform-*d*) δ 159.9 (d, *J* = 247.3 Hz), 136.0, 134.0, 131.5, 129.7 (d, *J* = 13.1 Hz), 129.2 (d, *J* = 8.2 Hz), 127.6 (d, *J* = 4.3 Hz), 124.4 (d, *J* = 3.6 Hz), 118.4, 115.4 (d, *J* = 21.5 Hz), 68.7 (d, *J* = 3.1 Hz).

<sup>19</sup>F NMR (376 MHz, Chloroform-*d*) δ -119.06 – -119.20 (m).

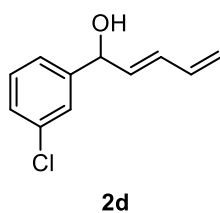

**(E)-1-(3-chlorophenyl)penta-2,4-dien-1-ol (2d):** colorless liquid.

<sup>1</sup>H NMR (400 MHz, Chloroform-*d*) δ 7.41 – 7.34 (m, 1H), 7.31-7.24 (m, 3H), 6.41 – 6.25 (m, 2H), 5.91 – 5.76 (m, 1H), 5.31 – 5.20 (m, 2H), 5.19 – 5.11 (m, 1H), 1.99 (brs, 1H).

<sup>13</sup>C NMR (101 MHz, Chloroform-*d*) δ 144.6, 135.9, 134.7, 134.4, 131.9, 129.8, 127.8, 126.4, 124.4, 118.7, 74.1.

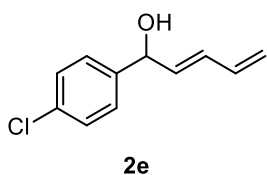

**(E)-1-(4-chlorophenyl)penta-2,4-dien-1-ol (2e):** colorless liquid.

**<sup>1</sup>H NMR** (400 MHz, Chloroform-*d*)  $\delta$  7.34 – 7.29 (m, 4H), 6.39 – 6.25 (m, 2H), 5.90 – 5.76 (m, 1H), 5.30 – 5.21 (m, 2H), 5.17 – 5.11 (m, 1H), 2.00 (s, 1H).

**<sup>13</sup>C NMR** (101 MHz, Chloroform-*d*)  $\delta$  141.1, 135.9, 135.0, 133.4, 131.7, 128.7, 127.6, 118.6, 74.0.

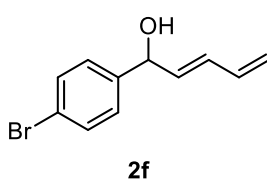

**(E)-1-(4-bromophenyl)penta-2,4-dien-1-ol (2f):** colorless liquid.

**<sup>1</sup>H NMR** (400 MHz, Chloroform-*d*)  $\delta$  7.54 – 7.44 (m, 2H), 7.29 – 7.24 (m, 2H), 6.42 – 6.22 (m, 2H), 5.91 – 5.74 (m, 1H), 5.31 – 5.19 (m, 2H), 5.18 – 5.11 (m, 1H), 2.00 (brs, 1H).

**<sup>13</sup>C NMR** (101 MHz, Chloroform-*d*) 141.6, 135.9, 134.9, 131.8, 131.6, 128.0, 121.6, 118.6, 74.0.

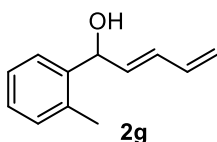

**(E)-1-(o-tolyl)penta-2,4-dien-1-ol (2g):** colorless liquid.

**<sup>1</sup>H NMR** (400 MHz, Chloroform-*d*)  $\delta$  7.48 – 7.43 (m, 1H), 7.24 – 7.10 (m, 3H), 6.39 – 6.22 (m, 2H), 5.86 (dd,  $J = 14.6, 6.2$  Hz, 1H), 5.44 (d,  $J = 6.4$  Hz, 1H), 5.22 (dd,  $J = 16.4, 2.0$  Hz, 1H), 5.10 (dd,  $J = 9.8, 1.8$  Hz, 1H), 2.34 (s, 3H), 1.94 (brs, 1H).

**<sup>13</sup>C NMR** (101 MHz, Chloroform-*d*)  $\delta$  140.6, 136.2, 135.2, 134.7, 131.3, 130.5, 127.6, 126.3, 125.8, 117.9, 71.4, 19.1.

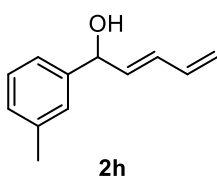

**(E)-1-(*m*-tolyl)penta-2,4-dien-1-ol (2h):** colorless liquid.

<sup>1</sup>H NMR (400 MHz, Chloroform-*d*) δ 7.25 – 7.21 (m, 1H), 7.19 – 7.14 (m, 2H), 7.12 – 7.08 (m, 1H), 6.40 – 6.28 (m, 2H), 5.93 – 5.84 (m, 1H), 5.28 – 5.20 (m, 2H), 5.14 – 5.09 (m, 1H), 2.36 (s, 3H), 1.96 (brs, 1H).

<sup>13</sup>C NMR (101 MHz, Chloroform-*d*) δ 142.7, 138.3, 136.2, 135.6, 131.1, 128.53, 128.50, 126.9, 123.3, 118.0, 74.7, 21.4.

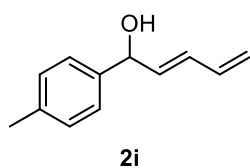

**(E)-1-(*p*-tolyl)penta-2,4-dien-1-ol (2i):** white solid.

<sup>1</sup>H NMR (400 MHz, Chloroform-*d*) δ 7.26 (d, *J* = 8.0 Hz, 2H), 7.17 (d, *J* = 8.0 Hz, 2H), 6.42 – 6.21 (m, 2H), 5.97 – 5.80 (m, 1H), 5.29 – 5.19 (m, 2H), 5.16 – 5.07 (m, 1H), 2.34 (s, 3H), 1.89 (brs, 1H).

<sup>13</sup>C NMR (101 MHz, Chloroform-*d*) δ 139.8, 137.5, 136.2, 135.6, 131.1, 129.3, 126.2, 117.9, 74.5, 21.1.

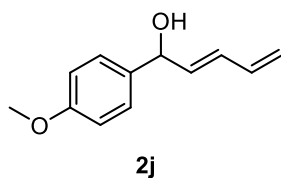

**(E)-1-(4-methoxyphenyl)penta-2,4-dien-1-ol (2j):** colorless liquid.

<sup>1</sup>H NMR (400 MHz, Chloroform-*d*) δ 7.22 (d, *J* = 7.2 Hz, 2H), 6.82 (d, *J* = 7.2 Hz, 2H), 6.33 – 6.19 (m, 2H), 5.87 – 5.76 (m, 1H), 5.21 – 5.12 (m, 2H), 5.07 – 5.01 (m, 1H), 3.73 (s, 3H), 1.84 (d, *J* = 3.2 Hz, 1H).

<sup>13</sup>C NMR (101 MHz, Chloroform-*d*) δ 159.2, 136.2, 135.7, 135.0, 131.0, 127.6, 117.9, 114.0, 74.2, 55.3.

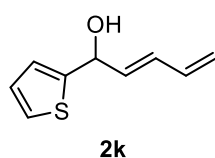

**(E)-1-(thiophen-2-yl)penta-2,4-dien-1-ol (2k):** orange liquid.

<sup>1</sup>H NMR (400 MHz, Chloroform-*d*) δ 7.28 – 7.24 (m, 1H), 7.02 – 6.92 (m, 2H), 6.45 – 6.30 (m, 2H), 6.03 – 5.86 (m, 1H), 5.47 (dd, *J* = 6.6, 3.8 Hz, 1H), 5.32 – 5.23 (m, 1H), 5.20 – 5.12 (m, 1H), 2.28 (d, *J* = 4.0 Hz, 1H).

<sup>13</sup>C NMR (101 MHz, Chloroform-*d*) δ 146.7, 135.9, 134.4, 131.8, 126.8, 125.2, 124.3, 118.6, 70.4.

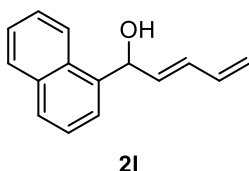

**(E)-1-(naphthalen-1-yl)penta-2,4-dien-1-ol (2l):** sticky yellow liquid.

<sup>1</sup>H NMR (400 MHz, Chloroform-*d*) δ 8.21 – 8.14 (m, 1H), 7.91 – 7.85 (m, 1H), 7.81 (d, *J* = 8.0 Hz, 1H), 7.63 (d, *J* = 6.8 Hz, 1H), 7.55 – 7.45 (m, 3H), 6.46 – 6.30 (m, 2H), 6.15 – 6.04 (m, 1H), 6.02 – 5.97 (m, 1H), 5.28 – 5.19 (m, 1H), 5.15 – 5.08 (m, 1H), 2.12 (brs, 1H).

<sup>13</sup>C NMR (101 MHz, Chloroform-*d*) δ 138.2, 136.2, 135.0, 133.9, 131.7, 130.6, 128.8, 128.5, 126.2, 125.7, 125.4, 123.9, 123.7, 118.1, 71.7.

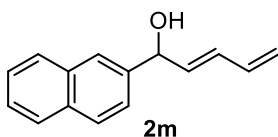

**(E)-1-(naphthalen-2-yl)penta-2,4-dien-1-ol (2m):** white solid.

<sup>1</sup>H NMR (400 MHz, Chloroform-*d*) δ 7.92 – 7.75 (m, 4H), 7.54 – 7.42 (m, 3H), 6.44 – 6.29 (m, 2H), 6.04 – 5.89 (m, 1H), 5.46 – 5.39 (m, 1H), 5.31 – 5.21 (m, 1H), 5.17 – 5.09 (m, 1H), 2.09 (d, *J* = 3.2 Hz, 1H).

<sup>13</sup>C NMR (101 MHz, Chloroform-*d*) δ 140.0, 136.2, 135.4, 133.3, 133.0, 131.5, 128.3, 128.0, 127.6, 126.2, 125.9, 124.8, 124.5, 118.2, 74.7.

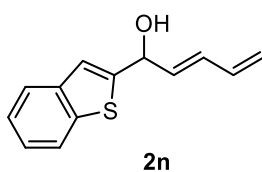



**(E)-1-(benzo[*b*]thiophen-2-yl)penta-2,4-dien-1-ol (2n):** white solid.

<sup>1</sup>H NMR (400 MHz, Chloroform-*d*) δ 7.78 – 7.68 (m, 1H), 7.67 – 7.60 (m, 1H), 7.29 – 7.20 (m, 2H), 7.13 (s, 1H), 6.38 – 6.25 (m, 2H), 5.98 – 5.84 (m, 1H), 5.51 – 5.43 (m, 1H), 5.27 – 5.18 (m, 1H), 5.15 – 5.08 (m, 1H), 2.19 (d, *J* = 4.4 Hz, 1H).

<sup>13</sup>C NMR (101 MHz, Chloroform-*d*) δ 147.4, 139.7, 139.5, 135.8, 133.8, 132.4, 124.30, 124.26, 123.6, 122.5, 120.7, 119.0, 71.1.

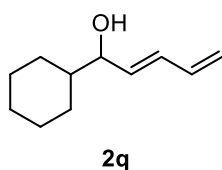

**(E)-1-cyclohexylpenta-2,4-dien-1-ol (2q):** colorless liquid.

<sup>1</sup>H NMR (400 MHz, Chloroform-*d*) δ 6.42 – 6.28 (m, 1H), 6.25 – 6.14 (m, 1H), 5.72 (dd, *J* = 15.2, 7.2 Hz, 1H), 5.21 (dd, *J* = 16.8, 1.6 Hz, 1H), 5.09 (dd, *J* = 10.0, 1.6 Hz, 1H), 3.89 (t, *J* = 6.6 Hz, 1H), 1.89 – 1.82 (m, 1H), 1.79 – 1.71 (m, 2H), 1.70 – 1.63 (m, 2H), 1.47 – 1.38 (m, 1H), 1.29 – 1.24 (m, 1H), 1.23 – 1.19 (m, 1H), 1.18 – 1.11 (m, 1H), 1.05 – 0.94 (m, 2H).

<sup>13</sup>C NMR (101 MHz, Chloroform-*d*) δ 136.4, 135.3, 131.8, 117.3, 43.8, 28.8, 28.5, 26.5, 26.1, 26.0.

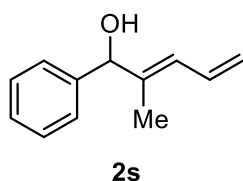

**(E)-2-methyl-1-phenylpenta-2,4-dien-1-ol (2s):**

<sup>1</sup>H NMR (400 MHz, Chloroform-*d*) δ 7.39 – 7.29 (m, 4H), 7.29 – 7.25 (m, 1H), 6.68 – 7.51 (m, 1H), 6.37 – 6.27 (m, 1H), 5.28 (dd, *J* = 16.4, 2.0 Hz, 1H), 5.20 – 5.08 (m, 2H), 1.99 (s, 1H), 1.63 (d, *J* = 1.2 Hz, 3H).

<sup>13</sup>C NMR (101 MHz, Chloroform-*d*) δ 141.9, 139.6, 132.6, 128.4, 127.6, 126.4, 126.1, 117.7, 78.8, 12.8.

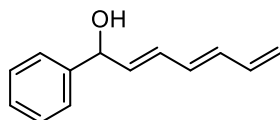

4a

**(2E,4E)-1-phenylhepta-2,4,6-trien-1-ol (4a):** white solid.

**<sup>1</sup>H NMR** (400 MHz, Chloroform-*d*)  $\delta$  7.39 – 7.33 (m, 4H), 7.31 – 7.26 (m, 1H), 6.41 – 6.21 (m, 4H), 5.94 – 5.86 (m, 1H), 5.30 – 5.21 (m, 2H), 5.14 – 5.09 (m, 1H), 1.98 (d,  $J = 3.2$  Hz, 1H).

**<sup>13</sup>C NMR** (101 MHz, Chloroform-*d*)  $\delta$  142.7, 136.7, 135.6, 134.1, 132.1, 130.6, 128.6, 127.8, 126.3, 117.8, 74.8.

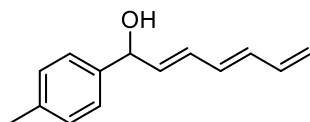

4b

**(2E,4E)-1-(*p*-tolyl)hepta-2,4,6-trien-1-ol (4b):** white solid.

**<sup>1</sup>H NMR** (400 MHz, Chloroform-*d*)  $\delta$  7.26 (d,  $J = 8.0$  Hz, 2H), 7.16 (d,  $J = 8.0$  Hz, 2H), 6.43 – 6.19 (m, 4H), 5.89 (dd,  $J = 14.8, 6.8$  Hz, 1H), 5.29 – 5.19 (m, 2H), 5.11 (dd,  $J = 10.0, 1.6$  Hz, 1H), 2.34 (s, 3H), 1.90 (brs, 1H).

**<sup>13</sup>C NMR** (101 MHz, Chloroform-*d*)  $\delta$  139.8, 137.5, 136.8, 135.8, 133.9, 132.3, 130.3, 129.2, 126.2, 117.7, 74.6, 21.1.

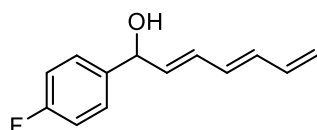

4c

**(2E,4E)-1-(4-fluorophenyl)hepta-2,4,6-trien-1-ol (4c):** white solid.

**<sup>1</sup>H NMR** (400 MHz, Chloroform-*d*)  $\delta$  7.39 – 7.30 (m, 2H), 7.10 – 6.97 (m, 2H), 6.41 – 6.18 (m, 4H), 5.86 (dd,  $J = 14.6, 6.6$  Hz, 1H), 5.30 – 5.21 (m, 2H), 5.13 (dd,  $J = 9.8, 1.4$  Hz, 1H), 2.01 (brs, 1H).

**<sup>13</sup>C NMR** (101 MHz, Chloroform-*d*)  $\delta$  162.3 (d,  $J = 246.6$  Hz), 138.4 (d,  $J = 3.0$  Hz), 136.7, 135.3, 134.4, 131.9, 130.8, 128.0 (d,  $J = 8.2$  Hz), 118.1, 115.4 (d,  $J = 21.4$  Hz), 74.1.

**<sup>19</sup>F NMR** (376 MHz, Chloroform-*d*)  $\delta$  -114.6 – -114.8 (m).

### 3. Typical procedure for stereodivergent synthesis of chiral $\zeta$ -hydroxy amino ester

#### General procedure for preparation of enantiomeric products:

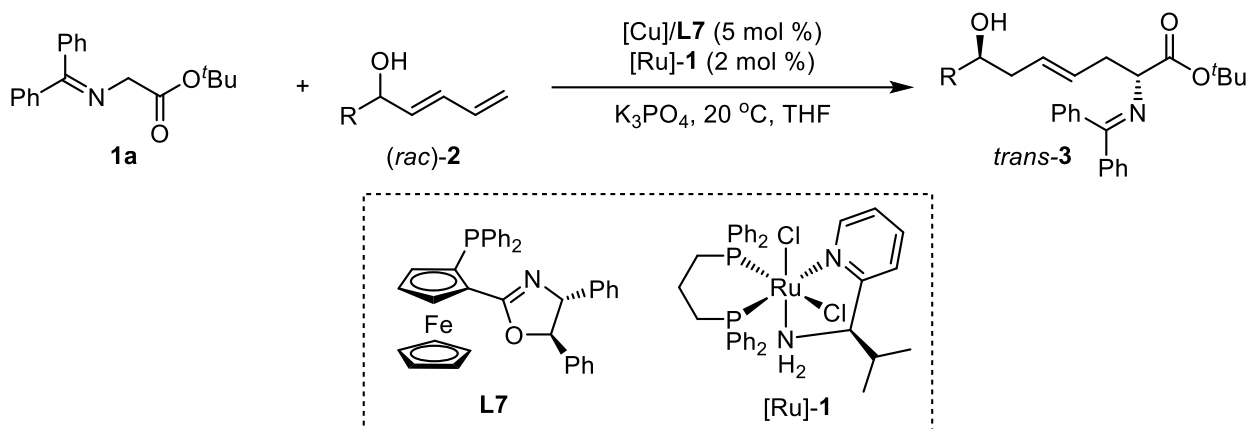

Under argon, to a flame dried Schlenk tube were added Cu(MeCN)<sub>4</sub>BF<sub>4</sub> (0.01 mmol) and L7 (0.011 mmol) and degassed THF (1 mL). The reaction mixture was stirred at 20 °C for 30 min. Then, [Ru]-1 complex (0.004 mmol), imino ester **1a** (0.20 mmol), dienyl carbinols **2** (0.60 mmol), K<sub>3</sub>PO<sub>4</sub> (0.20 mmol) and THF (1 mL) were added into the Schlenk tube under argon. The reaction mixture was continuously stirred at 20 °C. Once starting material was consumed (monitored by TLC), the organic solvent was removed and the residue was purified by column chromatography to give the desired *trans*-products, which were then directly analyzed by chiral HPLC to determine the dr value and the enantiomeric excess.

The corresponding *cis*-**3** was obtained by changing [Ru]-1 with *ent*-[Ru]-1 under otherwise identical conditions. Four stereodivergent products were produced with four different sets of catalyst combinations: [Cu/(*R,R,R<sub>p</sub>*)-L7]/[Ru]-1; [Cu/(*R,R,R<sub>p</sub>*)-L7]/*ent*-[Ru]-1; [Cu/(*S,S,S<sub>p</sub>*)-L7]/[Ru]-1; [Cu/(*S,S,S<sub>p</sub>*)-L7]/*ent*-[Ru]-1.

#### General procedure for preparation of racemic products:

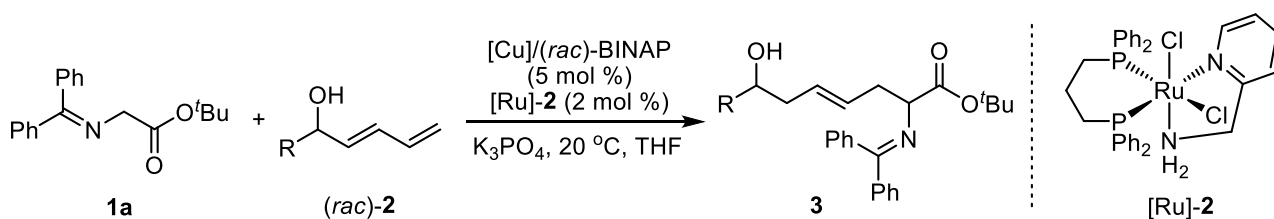

Under argon, to a flame dried Schlenk tube were added Cu(MeCN)<sub>4</sub>BF<sub>4</sub> (0.01 mmol) and (*rac*)-BINAP (0.011 mmol) and degassed THF (1.0 mL). The reaction mixture was stirred at 20 °C for 30

min. Then, [Ru]-2 complex (0.004 mmol), imino ester **1a** (0.20 mmol), dienyl carbinols **2** (0.60 mmol), K<sub>3</sub>PO<sub>4</sub> (0.20 mmol) and THF (1.0 mL) were added into the Schlenk tube under argon. The reaction mixture was continuously stirred at 20 °C overnight. Then the organic solvent was removed and the residue was purified by column chromatography to give the desired *rac*-products.

#### 4. Optimization of reaction conditions

**Table S1.** Evaluation of solvent <sup>a</sup>

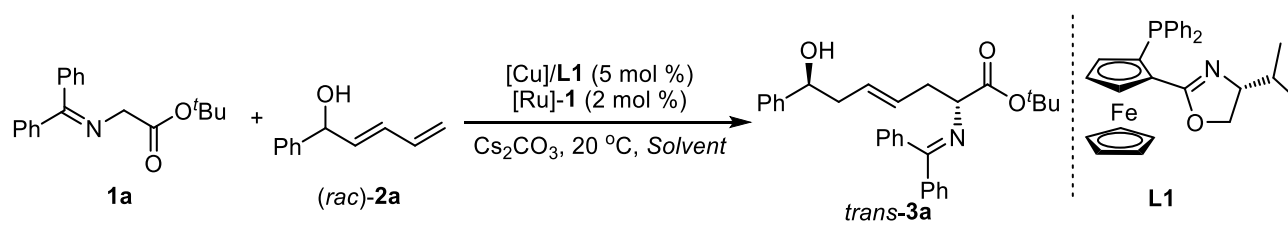

| Solvent           | yield (%) <sup>b</sup> | dr <sup>c</sup> | ee (%) <sup>c</sup> |
|-------------------|------------------------|-----------------|---------------------|
| THF               | 93                     | 4:1             | >99                 |
| Toluene           | mess                   | -               | -                   |
| DCM               | 70                     | 4:1             | 98                  |
| 1,4-Dioxane       | mess                   | -               | -                   |
| MTBE              | 83                     | 2:1             | 96                  |
| Et <sub>2</sub> O | 64                     | 1:1             | 91                  |
| 2-Me-THF          | 45                     | 1:1             | 33                  |

<sup>a</sup> All reactions were carried out with 0.20 mmol of **1a**, 0.60 mmol of **2a**, 0.005 mmol of [Cu], 0.0055 mmol of **L1** and 0.20 mmol of Cs<sub>2</sub>CO<sub>3</sub> in 2 mL of solvent at 20 °C. The reaction was monitored by TLC. [Cu] = Cu(MeCN)<sub>4</sub>BF<sub>4</sub>.

<sup>b</sup> Isolated yield. <sup>c</sup> The dr and ee values were determined by HPLC analysis.

**Table S2.** Evaluation of base <sup>a</sup>

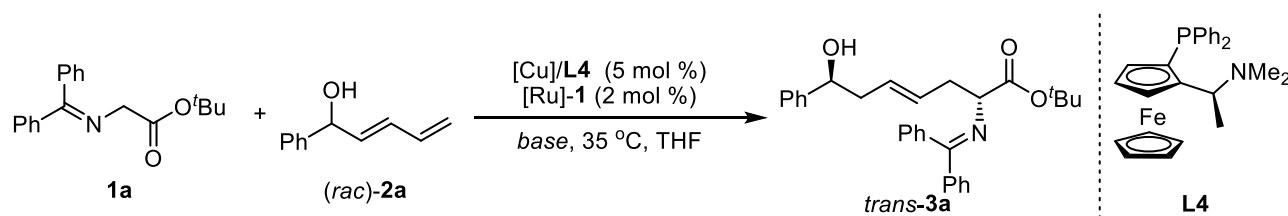

| Base                            | yield (%) <sup>b</sup> | dr <sup>c</sup> | ee (%) <sup>c</sup> |
|---------------------------------|------------------------|-----------------|---------------------|
| <sup>t</sup> BuOK               | 38                     | 1:1             | 0                   |
| Cs <sub>2</sub> CO <sub>3</sub> | 74                     | 11:1            | 99                  |
| K <sub>3</sub> PO <sub>4</sub>  | 72                     | 13:1            | 99                  |
| Na <sub>2</sub> CO <sub>3</sub> | -                      | -               | -                   |
| Et <sub>3</sub> N               | -                      | -               | -                   |

|     |       |   |   |
|-----|-------|---|---|
| DBU | trace | - | - |
|-----|-------|---|---|

<sup>a</sup> All reactions were carried out with 0.20 mmol of **1a**, 0.60 mmol of **2a**, 0.005 mmol of [Cu], 0.0055 mmol of **L4** and 0.20 mmol of the base in 2 mL of THF at 35 °C. The reaction was monitored by TLC. [Cu] = Cu(MeCN)<sub>4</sub>BF<sub>4</sub>.

<sup>b</sup> Isolated yield. <sup>c</sup> The dr and ee values were determined by HPLC analysis.

**Table S3.** Evaluation of temperature <sup>a</sup>

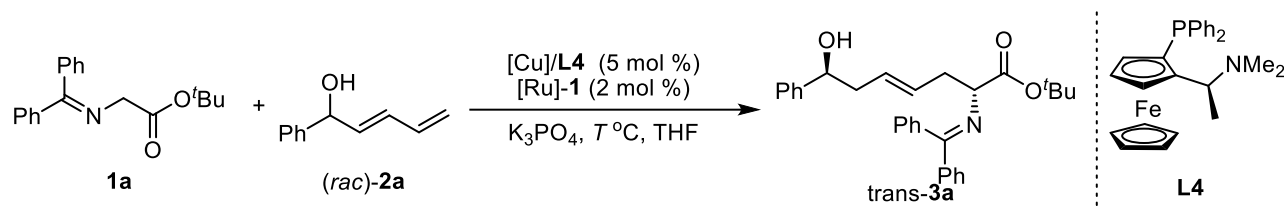

| T (°C) | yield (%) <sup>b</sup> | dr <sup>c</sup> | ee (%) <sup>c</sup> |
|--------|------------------------|-----------------|---------------------|
| 0      | 17                     | 16:1            | 99                  |
| 20     | 72                     | 9:1             | 97                  |
| 35     | 42                     | 4:1             | 96                  |

<sup>a</sup> All reactions were carried out with 0.20 mmol of **1a**, 0.60 mmol of **2a**, 0.005 mmol of [Cu], 0.0055 mmol of **L4** and 0.20 mmol of K<sub>3</sub>PO<sub>4</sub> in 2 mL of THF at T °C. The reaction was monitored by TLC. [Cu] = Cu(MeCN)<sub>4</sub>BF<sub>4</sub>. <sup>b</sup> Isolated yield. <sup>c</sup> The dr and ee values were determined by HPLC analysis.

**Table S4.** Evaluation of chiral ligand

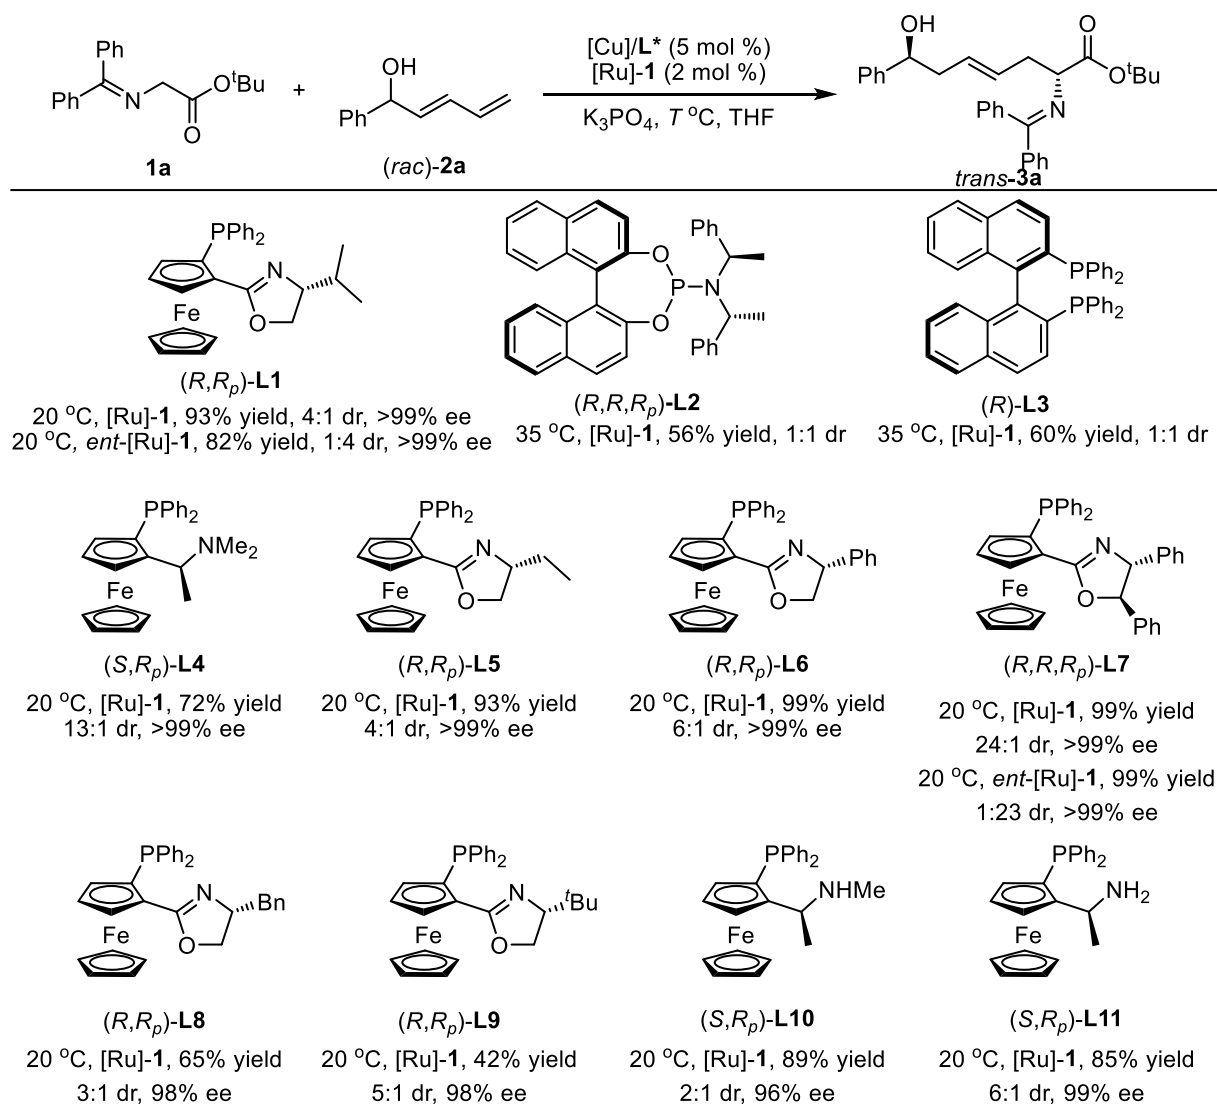

## 5. Characterization data for the products

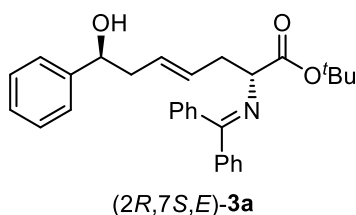

**tert-butyl (2*R*,7*S*,*E*)-2-((diphenylmethylene)amino)-7-hydroxy-7-phenylhept-4-enoate**

**((2*R*,7*S*,*E*)-3a):** yield (90 mg, 99%); colorless oil;  $[\alpha]_D^{20} = +24.8$  ( $c$  0.48,  $\text{CH}_2\text{Cl}_2$ ); The product was analyzed by HPLC to determine the dr value and enantiomeric excess:  $> 20:1$  dr,  $> 99\%$  ee (Chiralpak IC, *i*-propanol/hexane = 5/95, flow rate 1.0 mL/min,  $\lambda = 254$  nm);  $t_r = 26.30, 29.76, 31.69$  and 47.59 min.

**$^1\text{H}$  NMR** (400 MHz, Chloroform-*d*)  $\delta$  7.67 – 7.61 (m, 2H), 7.67 – 7.41 (m, 3H), 7.40 – 7.28 (m, 7H), 7.25 – 7.19 (m, 1H), 7.17 – 7.11 (m, 2H), 5.58 – 5.39 (m, 2H), 4.62 (dd,  $J = 8.4, 4.4$  Hz, 1H), 3.99 (dd,  $J = 7.2, 5.6$  Hz, 1H), 2.69 – 2.53 (m, 2H), 2.48 – 2.41 (m, 1H), 2.41 – 2.31 (m, 1H), 1.44 (s, 9H).

**$^{13}\text{C}$  NMR** (101 MHz, Chloroform-*d*)  $\delta$  170.9, 170.1, 143.9, 139.6, 136.6, 130.5, 130.2, 128.8, 128.7, 128.5, 128.4, 128.3, 128.0, 127.8, 127.3, 125.7, 81.1, 73.0, 66.0, 43.0, 37.1, 28.0.

**HRMS** (ESI+) calcd. For  $\text{C}_{30}\text{H}_{34}\text{NO}_3$  ( $[\text{M}+\text{H}]^+$ ): 456.2533, found: 456.2540.

### HPLC chromatogram of compound (2*R*,7*S*,*E*)-3a

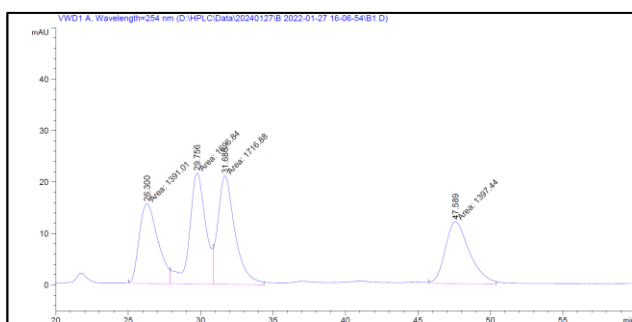

| Peak # | RetTime [min] | Type | Width [min] | Area [mAU*s] | Height [mAU] | Area %  |
|--------|---------------|------|-------------|--------------|--------------|---------|
| 1      | 26.300        | MF   | 1.4934      | 1391.01367   | 15.52366     | 22.4279 |
| 2      | 29.756        | MF   | 1.3096      | 1696.83582   | 21.59413     | 27.3588 |
| 3      | 31.686        | FM   | 1.3572      | 1716.87903   | 21.08306     | 27.6819 |
| 4      | 47.589        | MM   | 1.9347      | 1397.43835   | 12.03840     | 22.5315 |

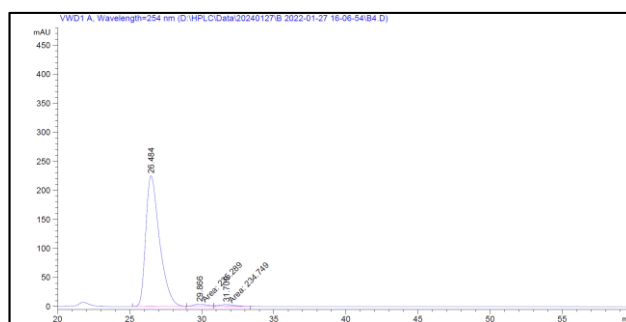

| Peak # | RetTime [min] | Type | Width [min] | Area [mAU*s] | Height [mAU] | Area %  |
|--------|---------------|------|-------------|--------------|--------------|---------|
| 1      | 26.484        | BB   | 1.0018      | 1.48875e4    | 224.75534    | 96.9394 |
| 2      | 29.866        | MF   | 1.0623      | 235.28857    | 3.69139      | 1.5321  |
| 3      | 31.709        | FM   | 1.2477      | 234.74864    | 3.13584      | 1.5286  |

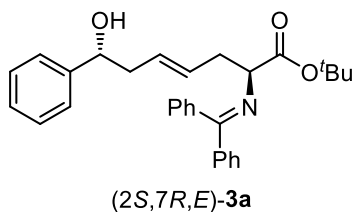

**tert-butyl (2S,7R,E)-2-((diphenylmethylene)amino)-7-hydroxy-7-phenylhept-4-enoate ((2S,7R,E)-3a):** yield (90 mg, 99%); colorless oil;  $[\alpha]_D^{20} = -24.6$  (*c* 0.68, CH<sub>2</sub>Cl<sub>2</sub>); The product was analyzed by HPLC to determine the dr value and enantiomeric excess: > 20:1 dr, > 99% ee (Chiralpak IC, *i*-propanol/hexane = 5/95, flow rate 1.0 mL/min,  $\lambda = 254$  nm);  $t_r = 26.30, 29.76, 31.69$  and 47.59 min.

**HRMS (ESI+)** calcd. For C<sub>30</sub>H<sub>34</sub>NO<sub>3</sub> ([M+H]<sup>+</sup>): 456.2533, found: 456.2539.

#### HPLC chromatogram of compound (2S,7R,E)-3a

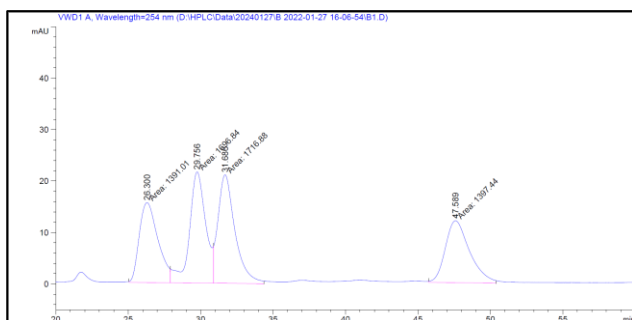

| Peak # | RetTime [min] | Type | Width [min] | Area [mAU*s] | Height [mAU] | Area %  |
|--------|---------------|------|-------------|--------------|--------------|---------|
| 1      | 26.300        | MF   | 1.4934      | 1391.01367   | 15.52366     | 22.4279 |
| 2      | 29.756        | MF   | 1.3096      | 1696.83582   | 21.59413     | 27.3588 |
| 3      | 31.686        | FM   | 1.3572      | 1716.87903   | 21.08306     | 27.6819 |
| 4      | 47.589        | MM   | 1.9347      | 1397.43835   | 12.03840     | 22.5315 |

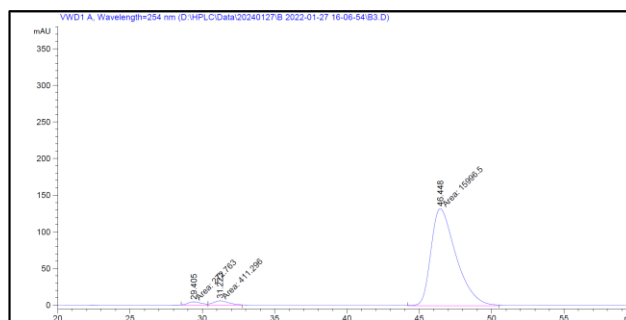

| Peak # | RetTime [min] | Type | Width [min] | Area [mAU*s] | Height [mAU] | Area %  |
|--------|---------------|------|-------------|--------------|--------------|---------|
| 1      | 29.405        | MF   | 1.0665      | 272.76273    | 4.26271      | 1.6352  |
| 2      | 31.223        | FM   | 1.2144      | 411.29568    | 5.64460      | 2.4657  |
| 3      | 46.448        | MM   | 2.0112      | 1.59965e4    | 132.56378    | 95.8991 |

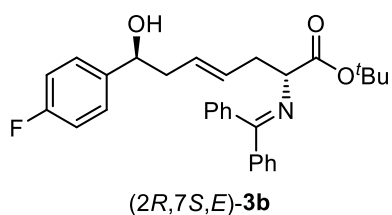

**tert-butyl (2R,7S,E)-2-((diphenylmethylene)amino)-7-(4-fluorophenyl)-7-hydroxyhept-4-enoate ((2R,7S,E)-3b):** yield (89 mg, 94%); colorless oil;  $[\alpha]_D^{15} = +17.5$  (*c* 0.58, CH<sub>2</sub>Cl<sub>2</sub>); The product was analyzed by HPLC to determine the dr value and the enantiomeric excess: 19:1 dr, > 99% ee (Chiralpak IC, *i*-propanol/hexane = 5/95, flow rate 1.0 mL/min,  $\lambda = 254$  nm);  $t_r = 17.36, 19.09, 20.90$  and 29.52 min.



**<sup>1</sup>H NMR** (400 MHz, Chloroform-*d*) δ 7.66 – 7.61 (m, 2H), 7.46 – 7.37 (m, 4H), 7.35 – 7.30 (m, 2H), 7.28 – 7.24 (m, 2H), 7.17 – 7.11 (m, 2H), 7.00 – 6.93 (m, 2H), 5.55 – 5.41 (m, 2H), 4.60 (dd, *J* = 8.2, 4.6 Hz, 1H), 3.98 (dd, *J* = 6.8, 5.6 Hz, 1H), 2.65 – 2.54 (m, 2H), 2.44 – 2.38 (m, 1H), 2.37 – 2.33 (m, 1H), 1.44 (s, 9H).

**<sup>13</sup>C NMR** (101 MHz, Chloroform-*d*) δ 170.9, 170.2, 162.0 (d, *J* = 245.9 Hz), 139.6 (d, *J* = 3.0 Hz), 139.5, 136.5, 130.8, 130.3, 128.8, 128.6, 128.5, 128.4, 128.0, 127.7, 127.3 (d, *J* = 8.0 Hz), 115.0 (d, *J* = 21.4 Hz), 81.2, 72.3, 65.9, 43.1, 37.1, 28.0.

**<sup>19</sup>F NMR** (376 MHz, Chloroform-*d*) δ -115.41 – -115.69 (m).

**HRMS** (ESI+) calcd. For C<sub>30</sub>H<sub>33</sub>FNO<sub>3</sub> ([M+H]<sup>+</sup>): 474.2439, found: 474.2440.

### HPLC chromatogram of compound (2*R*,7*S*,*E*)-3b

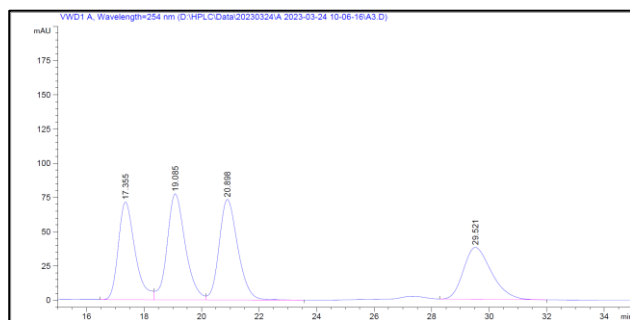

| Peak # | RetTime [min] | Type | Width [min] | Area [mAU*s] | Height [mAU] | Area %  |
|--------|---------------|------|-------------|--------------|--------------|---------|
| 1      | 17.355        | BV   | 0.6159      | 2889.46973   | 71.27767     | 23.7707 |
| 2      | 19.085        | VV   | 0.6637      | 3398.20605   | 77.33379     | 27.9559 |
| 3      | 20.898        | VB   | 0.6902      | 3307.86353   | 73.34522     | 27.2127 |
| 4      | 29.521        | BB   | 1.0322      | 2560.06177   | 37.89103     | 21.0608 |

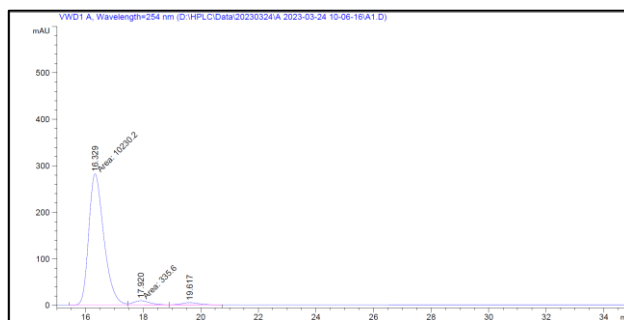

| Peak # | RetTime [min] | Type | Width [min] | Area [mAU*s] | Height [mAU] | Area %  |
|--------|---------------|------|-------------|--------------|--------------|---------|
| 1      | 16.329        | MF   | 0.6053      | 1.02302e4    | 281.68924    | 95.1457 |
| 2      | 17.920        | FM   | 0.6381      | 335.59995    | 8.76516      | 3.1212  |
| 3      | 19.617        | BB   | 0.6070      | 186.34337    | 4.58619      | 1.7331  |

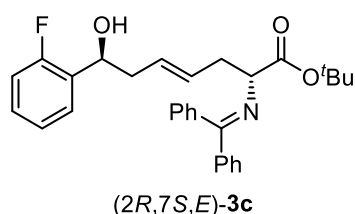

**tert-butyl (2*R*,7*S*,*E*)-2-((diphenylmethylene)amino)-7-(2-fluorophenyl)-7-hydroxyhept-4-enoate ((2*R*,7*S*,*E*)-3c):** yield (91 mg, 96%); colorless oil;  $[\alpha]_D^{20} = +13.6$  (*c* 0.52, CH<sub>2</sub>Cl<sub>2</sub>); The product was analyzed by HPLC to determine the dr value and the enantiomeric excess: 11:1 dr, 99% ee (Chiralpak IF + Chiralpak IF, *i*-propanol/hexane = 5/95, flow rate 1.0 mL/min, λ = 254 nm); *t<sub>r</sub>* = 18.77, 19.68, 20.47 and 22.37 min.

**<sup>1</sup>H NMR** (400 MHz, Chloroform-*d*)  $\delta$  7.68 – 7.61 (m, 2H), 7.47 – 7.41 (m, 4H), 7.40 – 7.31 (m, 3H), 7.23 – 7.14 (m, 3H), 7.12 – 7.07 (m, 1H), 7.00 – 6.93 (m, 1H), 5.57 – 5.45 (m, 2H), 4.95 (dd,  $J$  = 8.6, 4.2 Hz, 1H), 4.00 (dd,  $J$  = 6.4, 6.4 Hz, 1H), 2.67 – 2.57 (m, 2H), 2.44 – 2.26 (m, 2H), 1.45 (s, 9H).

**<sup>13</sup>C NMR** (101 MHz, Chloroform-*d*)  $\delta$  170.9, 170.2, 160.0 (d,  $J$  = 123.2 Hz), 139.5, 136.6, 131.0, 130.8, 130.8, 130.3, 128.8, 128.6, 128.53, 128.47, 128.0, 127.8, 127.1 (d,  $J$  = 4.4 Hz), 124.1 (d,  $J$  = 3.6 Hz), 115.1 (d,  $J$  = 21.4 Hz), 81.2, 67.0, 66.0, 41.7, 37.1, 28.1.

**<sup>19</sup>F NMR** (376 MHz, Chloroform-*d*)  $\delta$  -119.64 – -119.87 (m).

**HRMS** (ESI+) calcd. For C<sub>30</sub>H<sub>33</sub>FNO<sub>3</sub> ([M+H]<sup>+</sup>): 474.2439, found: 474.2443.

### HPLC chromatogram of compound (2*R*,7*S*,*E*)-3c

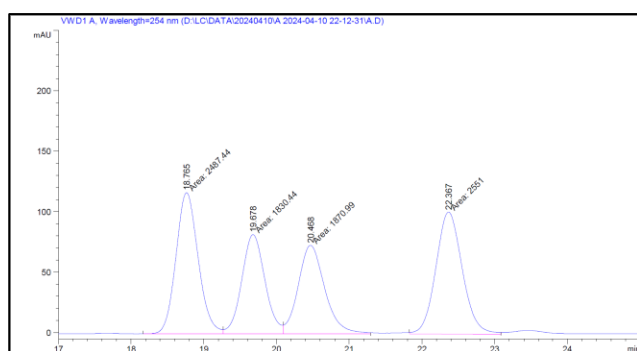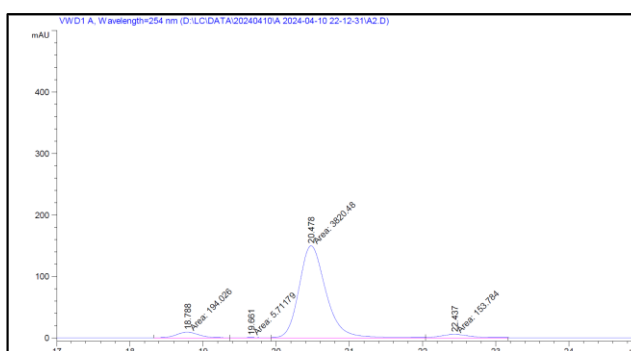

| Peak # | RetTime [min] | Type | Width [min] | Area [mAU*s] | Height [mAU] | Area %  |
|--------|---------------|------|-------------|--------------|--------------|---------|
| 1      | 18.765        | MF   | 0.3547      | 2487.43530   | 116.87381    | 28.4608 |
| 2      | 19.678        | MF   | 0.3709      | 1830.43713   | 82.25761     | 20.9436 |
| 3      | 20.468        | MF   | 0.4250      | 1870.98657   | 73.37386     | 21.4075 |
| 4      | 22.367        | FM   | 0.4213      | 2550.99854   | 100.91523    | 29.1881 |

| Peak # | RetTime [min] | Type | Width [min] | Area [mAU*s] | Height [mAU] | Area %  |
|--------|---------------|------|-------------|--------------|--------------|---------|
| 1      | 18.788        | MF   | 0.3540      | 194.02628    | 9.13515      | 4.6484  |
| 2      | 19.661        | MF   | 0.3721      | 5.71179      | 2.55812e-1   | 0.1368  |
| 3      | 20.478        | MF   | 0.4252      | 3820.47852   | 149.75595    | 91.5304 |
| 4      | 22.437        | FM   | 0.4623      | 153.78445    | 5.54425      | 3.6843  |

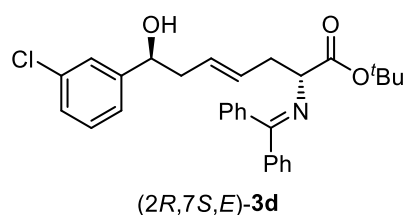

**tert-butyl (2*R*,7*S*,*E*)-7-(3-chlorophenyl)-2-((diphenylmethylene)amino)-7-hydroxyhept-4-enoate ((2*R*,7*S*,*E*)-3d):** yield (90 mg, 92%); colorless oil;  $[\alpha]_D^{15} = +16.3$  ( $c$  0.61, CH<sub>2</sub>Cl<sub>2</sub>); The product was analyzed by HPLC to determine the dr value and the enantiomeric excess: > 20:1 dr, > 99% ee (Chiralpak IC, *i*-propanol/hexane = 5/95, flow rate 1.0 mL/min,  $\lambda$  = 254 nm);  $t_r$  = 18.04, 22.19, 24.45 and 52.05 min.

**<sup>1</sup>H NMR** (400 MHz, Chloroform-*d*)  $\delta$  7.67 – 7.60 (m, 2H), 7.48 – 7.41 (m, 3H), 7.40 – 7.36 (m, 1H),

7.36 – 7.30 (m, 3H), 7.22 – 7.12 (m, 5H), 5.61 – 5.35 (m, 2H), 4.60 (dd,  $J = 8.5, 4.2$  Hz, 1H), 3.99 (dd,  $J = 6.4, 6.0$  Hz, 1H), 2.64 – 2.54 (m, 2H), 2.46 – 2.41 (m, 1H), 2.36 – 2.28 (m, 1H), 1.44 (s, 9H).  
 $^{13}\text{C}$  NMR (101 MHz, Chloroform- $d$ )  $\delta$  170.9, 170.2, 146.0, 139.5, 136.6, 134.2, 131.1, 130.3, 129.5, 128.8, 128.6, 128.5, 128.3, 128.0, 127.7, 127.3, 125.9, 123.9, 81.2, 72.2, 65.9, 43.0, 37.1, 28.0.

HRMS (ESI+) calcd. For  $\text{C}_{30}\text{H}_{33}\text{ClNO}_3$  ( $[\text{M}+\text{H}]^+$ ): 490.2143, found: 490.2147.

### HPLC chromatogram of compound (2*R*,7*S*,*E*)-3*d*

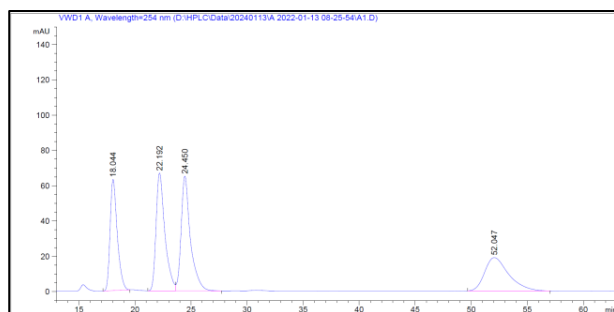

| Peak # | RetTime [min] | Type | Width [min] | Area [mAU*s] | Height [mAU] | Area %  |
|--------|---------------|------|-------------|--------------|--------------|---------|
| 1      | 18.044        | BB   | 0.6686      | 2799.91260   | 62.98667     | 21.5644 |
| 2      | 22.192        | BV   | 0.8148      | 3652.05640   | 66.69958     | 28.1275 |
| 3      | 24.450        | VB   | 0.8407      | 3734.44385   | 64.96114     | 28.7620 |
| 4      | 52.047        | BB   | 1.8575      | 2797.53638   | 18.81717     | 21.5461 |

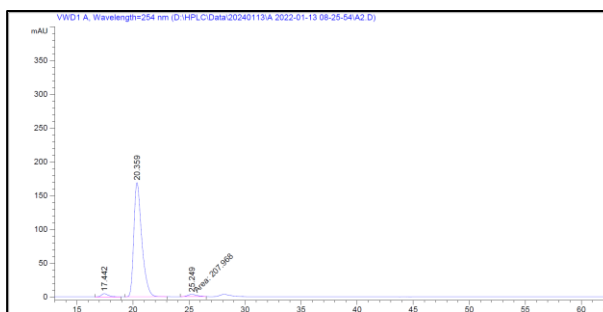

| Peak # | RetTime [min] | Type | Width [min] | Area [mAU*s] | Height [mAU] | Area %  |
|--------|---------------|------|-------------|--------------|--------------|---------|
| 1      | 17.442        | BB   | 0.6057      | 193.48793    | 4.66641      | 2.2110  |
| 2      | 20.359        | BB   | 0.7419      | 8349.81445   | 168.84679    | 95.4126 |
| 3      | 25.249        | MF   | 0.9822      | 207.96782    | 3.52879      | 2.3764  |

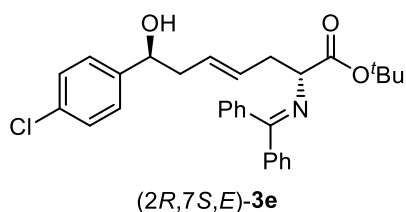

**tert-butyl (2*R*,7*S*,*E*)-7-(4-chlorophenyl)-2-((diphenylmethylene)amino)-7-hydroxyhept-4-enoate ((2*R*,7*S*,*E*)-3*e*):** yield (80 mg, 82%); colorless oil;  $[\alpha]_D^{15} = +18.1$  ( $c$  0.53,  $\text{CH}_2\text{Cl}_2$ ); The product was analyzed by HPLC to determine the dr value and the enantiomeric excess: > 20:1 dr, > 99% ee (Chiralpak IE, *i*-propanol/hexane = 5/95, flow rate 1.0 mL/min,  $\lambda = 254$  nm);  $t_r = 23.48, 24.58, 25.91$  and 28.76 min.

$^1\text{H}$  NMR (400 MHz, Chloroform- $d$ )  $\delta$  7.59 – 7.53 (m, 2H), 7.40 – 7.34 (m, 3H), 7.33 – 7.29 (m, 1H), 7.28 – 7.23 (m, 2H), 7.19 – 7.15 (m, 4H), 7.09 – 7.03 (m, 2H), 5.50 – 5.32 (m, 2H), 4.53 (dd,  $J = 8.2, 4.6$  Hz, 1H), 3.91 (dd,  $J = 6.8, 5.6$  Hz, 1H), 2.58 – 2.47 (m, 2H), 2.38 – 2.32 (m, 1H), 2.28 – 2.22 (m, 1H), 1.37 (s, 9H).

$^{13}\text{C}$  NMR (101 MHz, Chloroform-*d*)  $\delta$  170.9, 170.2, 142.4, 139.5, 136.6, 132.9, 131.0, 130.3, 128.8, 128.6, 128.5, 128.4, 128.3, 128.0, 127.8, 127.1, 81.2, 72.3, 65.9, 43.0, 37.1, 28.1.

HRMS (ESI+) calcd. For  $\text{C}_{30}\text{H}_{33}\text{ClNO}_3$  ( $[\text{M}+\text{H}]^+$ ): 490.2143, found: 490.2146.

### HPLC chromatogram of compound (2*R*,7*S*,*E*)-3e

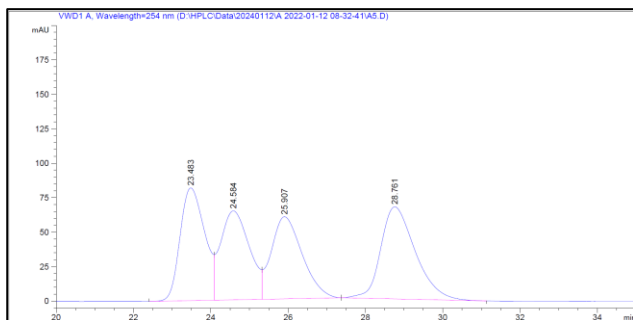

| Peak # | RetTime [min] | Type | Width [min] | Area [mAU*s] | Height [mAU] | Area %  |
|--------|---------------|------|-------------|--------------|--------------|---------|
| 1      | 23.483        | BV   | 0.6857      | 3619.99219   | 81.73204     | 25.0628 |
| 2      | 24.584        | VV   | 0.7862      | 3358.27295   | 64.52159     | 23.2508 |
| 3      | 25.907        | VB   | 0.8367      | 3323.45581   | 59.58376     | 23.0097 |
| 4      | 28.761        | BB   | 0.9501      | 4141.96729   | 66.82352     | 28.6767 |

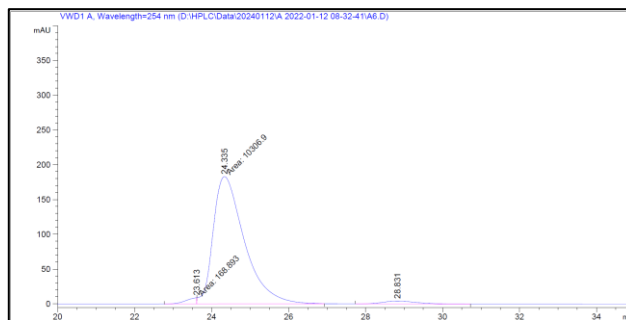

| Peak # | RetTime [min] | Type | Width [min] | Area [mAU*s] | Height [mAU] | Area %  |
|--------|---------------|------|-------------|--------------|--------------|---------|
| 1      | 23.613        | MF   | 0.3146      | 168.89313    | 8.94613      | 1.5754  |
| 2      | 24.335        | FM   | 0.9385      | 1.03069e4    | 183.04245    | 96.1425 |
| 3      | 28.831        | BB   | 0.8208      | 244.64882    | 4.21133      | 2.2821  |

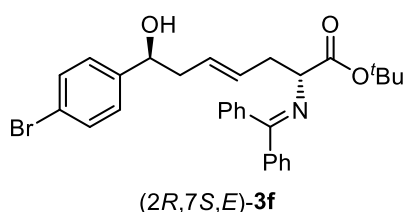

**tert-butyl (2*R*,7*S*,*E*)-7-(4-bromophenyl)-2-((diphenylmethylene)amino)-7-hydroxyhept-4-enoate ((2*R*,7*S*,*E*)-3f):** yield (98 mg, 92%); colorless oil;  $[\alpha]_D^{15} = +9.4$  (*c* 0.47,  $\text{CH}_2\text{Cl}_2$ ); The product was analyzed by HPLC to determine the dr value and the enantiomeric excess: > 20:1 dr, > 99% ee (Chiralpak IE, *i*-propanol/hexane = 5/95, flow rate 1.0 mL/min,  $\lambda = 254$  nm);  $t_r = 24.47, 25.66, 26.95$  and 30.03 min.

$^1\text{H}$  NMR (400 MHz, Chloroform-*d*)  $\delta$  7.64 (d,  $J = 7.2$  Hz, 1H), 7.46 – 7.37 (m, 6H), 7.36 – 7.31 (m, 2H), 7.19 – 7.11 (m, 4H), 5.56 – 5.40 (m, 2H), 4.59 (dd,  $J = 8.4, 4.4$  Hz, 1H), 3.98 (dd,  $J = 6.4, 6.4$  Hz, 1H), 2.65 – 2.54 (m, 2H), 2.45 – 2.38 (m, 1H), 2.35 – 2.30 (m, 1H), 1.44 (s, 9H).

$^{13}\text{C}$  NMR (101 MHz, Chloroform-*d*)  $\delta$  170.8, 170.2, 142.9, 139.5, 136.5, 131.3, 131.0, 130.3, 128.8, 128.6, 128.5, 128.3, 128.0, 127.7, 127.5, 121.0, 81.2, 72.3, 65.9, 43.0, 37.1, 28.0.

HRMS (ESI+) calcd. For  $\text{C}_{30}\text{H}_{33}\text{BrNO}_3$  ( $[\text{M}+\text{H}]^+$ ): 534.1638, found: 534.1644.

## HPLC chromatogram of compound (2*R*,7*S*,*E*)-3f

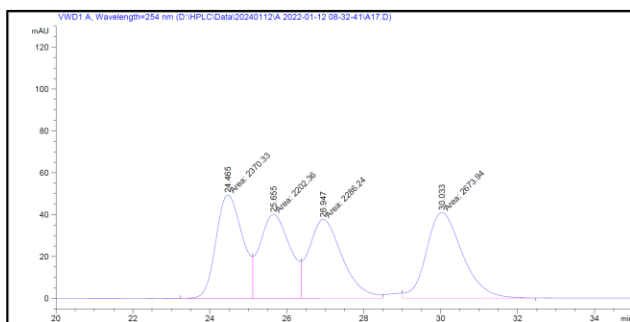

| Peak # | RetTime [min] | Type | Width [min] | Area [mAU*s] | Height [mAU] | Area %  |
|--------|---------------|------|-------------|--------------|--------------|---------|
| 1      | 24.465        | MF   | 0.7993      | 2370.32544   | 49.42738     | 24.8648 |
| 2      | 25.655        | FM   | 0.9153      | 2202.36450   | 40.10333     | 23.1028 |
| 3      | 26.947        | FM   | 1.0117      | 2286.24121   | 37.66394     | 23.9827 |
| 4      | 30.033        | FM   | 1.0899      | 2673.94165   | 40.88910     | 28.0497 |

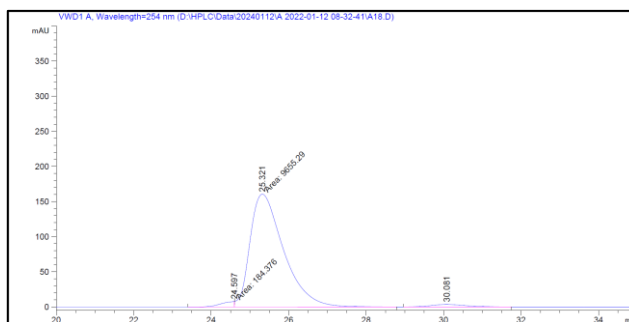

| Peak # | RetTime [min] | Type | Width [min] | Area [mAU*s] | Height [mAU] | Area %  |
|--------|---------------|------|-------------|--------------|--------------|---------|
| 1      | 24.597        | MF   | 0.3902      | 184.37611    | 7.87496      | 1.8353  |
| 2      | 25.321        | FM   | 1.0022      | 9655.29395   | 160.57590    | 96.1114 |
| 3      | 30.081        | BB   | 0.7977      | 206.27431    | 3.40067      | 2.0533  |

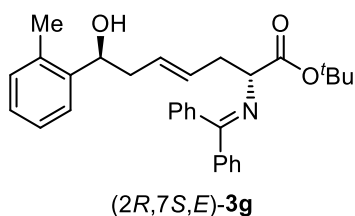

**tert-butyl (2*R*,7*S*,*E*)-2-((diphenylmethylene)amino)-7-hydroxy-7-(*o*-tolyl)hept-4-enoate ((2*R*,7*S*,*E*)-3g):** yield (88 mg, 94%); colorless oil;  $[\alpha]_D^{15} = +18.4$  ( $c$  0.48,  $\text{CH}_2\text{Cl}_2$ ); The product was analyzed by HPLC to determine the dr value and the enantiomeric excess: 19:1 dr, > 99% ee (Chiralpak IC, *i*-propanol/hexane = 5/95, flow rate 1.0 mL/min,  $\lambda = 254$  nm);  $t_r = 25.14, 27.38, 31.10$  and 41.29 min.

**$^1\text{H NMR}$**  (400 MHz, Chloroform-*d*)  $\delta$  7.68 – 7.62 (m, 2H), 7.47 – 7.41 (m, 4H), 7.39 – 7.30 (m, 3H), 7.20 – 7.11 (m, 4H), 7.09 – 7.05 (m, 1H), 5.56 – 5.47 (m, 2H), 4.84 (dd,  $J = 8.4, 4.0$  Hz, 1H), 4.00 (dd,  $J = 6.4, 6.0$  Hz, 1H), 2.68 – 2.57 (m, 2H), 2.45 – 2.38 (m, 1H), 2.34 – 2.28 (m, 1H), 2.26 (s, 3H), 1.45 (s, 9H).

**$^{13}\text{C NMR}$**  (101 MHz, Chloroform-*d*)  $\delta$  170.9, 170.1, 142.0, 139.5, 136.6, 134.2, 130.34, 130.25, 130.2, 129.1, 128.8, 128.6, 128.4, 128.0, 127.8, 127.0, 126.2, 125.1, 81.1, 69.5, 65.9, 41.7, 37.1, 28.0, 19.0.

**HRMS** (ESI+) calcd. For  $\text{C}_{31}\text{H}_{36}\text{NO}_3$  ( $[\text{M}+\text{H}]^+$ ): 470.2690, found: 470.2691.

## HPLC chromatogram of compound (2*R*,7*S*,*E*)-3g

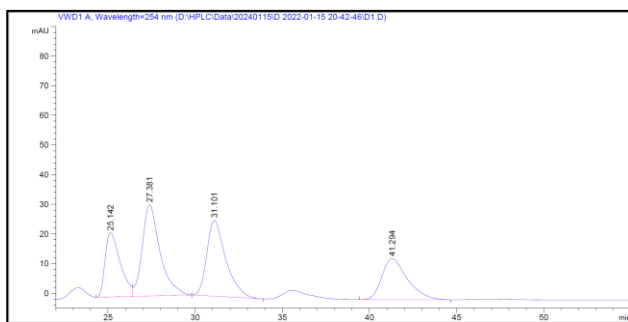

| Peak # | RetTime [min] | Type | Width [min] | Area [mAU*s] | Height [mAU] | Area %  |
|--------|---------------|------|-------------|--------------|--------------|---------|
| 1      | 25.142        | BV   | 0.9046      | 1314.24036   | 21.63872     | 19.1849 |
| 2      | 27.381        | VB   | 1.0323      | 2185.32861   | 30.78133     | 31.9008 |
| 3      | 31.101        | BB   | 1.1250      | 1943.81995   | 25.59508     | 28.3753 |
| 4      | 41.294        | BB   | 1.4303      | 1406.99451   | 13.83712     | 20.5389 |

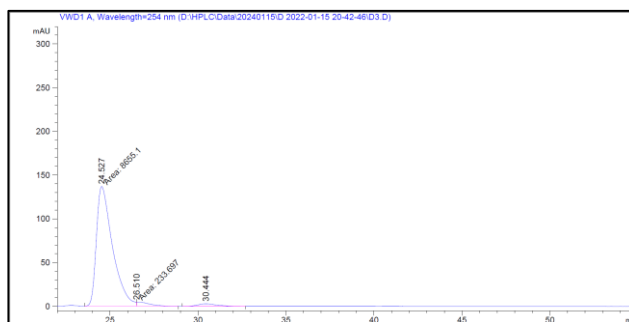

| Peak # | RetTime [min] | Type | Width [min] | Area [mAU*s] | Height [mAU] | Area %  |
|--------|---------------|------|-------------|--------------|--------------|---------|
| 1      | 24.527        | MF   | 1.0551      | 8655.09570   | 136.72385    | 95.2062 |
| 2      | 26.510        | FM   | 0.8466      | 233.69702    | 4.60074      | 2.5707  |
| 3      | 30.444        | BB   | 0.8716      | 202.10471    | 2.78842      | 2.2232  |

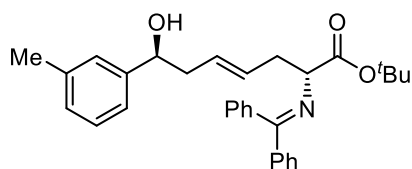

(2*R*,7*S*,*E*)-3h

**tert-butyl (2*R*,7*S*,*E*)-2-((diphenylmethylene)amino)-7-hydroxy-7-(*m*-tolyl)hept-4-enoate**

**((2*R*,7*S*,*E*)-3h):** yield (88 mg, 94%); colorless oil;  $[\alpha]_D^{20} = +22.9$  (*c* 0.62, CH<sub>2</sub>Cl<sub>2</sub>); The product was analyzed by HPLC to determine the dr value and the enantiomeric excess: 19:1 dr, > 99% ee (Chiralpak IC + Chiralpak IE, *i*-propanol/hexane = 10/90, flow rate 0.75 mL/min,  $\lambda = 254$  nm);  $t_r = 35.60, 37.08, 42.17$  and 48.43 min.

**<sup>1</sup>H NMR** (400 MHz, Chloroform-*d*)  $\delta$  7.67 – 7.61 (m, 2H), 7.47 – 7.41 (m, 3H), 7.39 – 7.35 (m, 1H), 7.35 – 7.29 (m, 2H), 7.20 – 7.12 (m, 4H), 7.10 – 7.03 (m, 2H), 5.56 – 5.43 (m, 2H), 4.59 (dd, *J* = 8.4, 4.4 Hz, 1H), 3.99 (dd, *J* = 7.0, 5.4 Hz, 1H), 2.66 – 2.54 (m, 2H), 2.47 – 2.41 (m, 1H), 2.40 – 2.34 (m, 1H), 2.33 (s, 3H), 1.44 (s, 9H).

**<sup>13</sup>C NMR** (101 MHz, Chloroform-*d*)  $\delta$  170.9, 170.1, 143.9, 139.6, 137.9, 136.6, 130.4, 130.2, 128.9, 128.8, 128.5, 128.4, 128.2, 128.1, 128.0, 127.8, 126.4, 122.8, 81.1, 73.1, 66.0, 43.0, 37.1, 28.0, 21.4.

**HRMS** (ESI+) calcd. For C<sub>31</sub>H<sub>36</sub>NO<sub>3</sub> ([M+H]<sup>+</sup>): 470.2690, found: 470.2693.

## HPLC chromatogram of compound (2*R*,7*S*,*E*)-3h

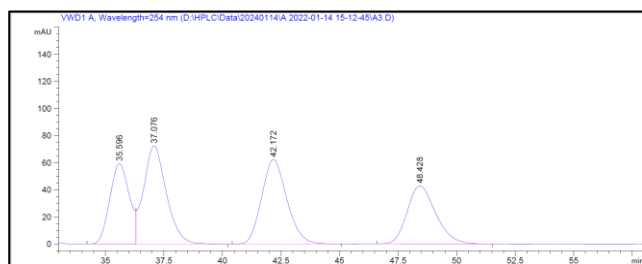

| Peak # | RetTime [min] | Type | Width [min] | Area [mAU*s] | Height [mAU] | Area %  |
|--------|---------------|------|-------------|--------------|--------------|---------|
| 1      | 35.596        | BV   | 0.8829      | 3422.52173   | 59.34138     | 20.6241 |
| 2      | 37.076        | VB   | 0.9937      | 4889.97803   | 72.42786     | 29.4670 |
| 3      | 42.172        | BB   | 1.1217      | 4668.31738   | 62.47826     | 28.1313 |
| 4      | 48.428        | BB   | 1.2574      | 3613.95337   | 42.91986     | 21.7777 |

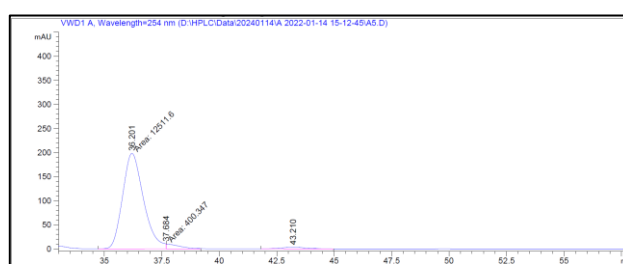

| Peak # | RetTime [min] | Type | Width [min] | Area [mAU*s] | Height [mAU] | Area %  |
|--------|---------------|------|-------------|--------------|--------------|---------|
| 1      | 36.201        | MF   | 1.0514      | 1.25116e4    | 198.32797    | 95.0704 |
| 2      | 37.684        | FM   | 0.6492      | 400.34705    | 10.27870     | 3.0421  |
| 3      | 43.210        | BB   | 0.9008      | 248.40707    | 3.33951      | 1.8875  |

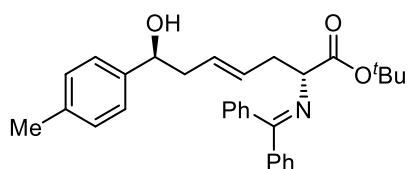

(2*R*,7*S*,*E*)-3i

**tert-butyl (2*R*,7*S*,*E*)-2-((diphenylmethylene)amino)-7-hydroxy-7-(*p*-tolyl)hept-4-enoate**

**((2*R*,7*S*,*E*)-3i):** yield (90 mg, 96%); colorless oil;  $[\alpha]_D^{15} = +7.1$  (*c* 0.70, CH<sub>2</sub>Cl<sub>2</sub>); The product was analyzed by HPLC to determine the dr value and the enantiomeric excess: 17:1 dr, > 99% ee (Chiralpak IE, *i*-propanol/hexane = 5/95, flow rate 1.0 mL/min,  $\lambda = 254$  nm);  $t_r = 25.91, 27.81, 29.17$  and 34.37 min.

**<sup>1</sup>H NMR** (400 MHz, Chloroform-*d*)  $\delta$  7.59 – 7.53 (m, 2H), 7.38 – 7.33 (m, 3H), 7.32 – 7.22 (m, 3H), 7.14 – 7.10 (m, 2H), 7.08 – 7.00 (m, 4H), 5.47 – 5.35 (m, 2H), 4.52 (dd, *J* = 8.2, 4.6 Hz, 1H), 3.90 (dd, *J* = 7.2, 5.6 Hz, 1H), 2.58 – 2.46 (m, 2H), 2.39 – 2.32 (m, 1H), 2.32 – 2.27 (m, 1H), 2.24 (s, 3H), 1.36 (s, 9H).

**<sup>13</sup>C NMR** (101 MHz, Chloroform-*d*)  $\delta$  170.9, 170.1, 141.0, 139.6, 136.9, 136.6, 130.4, 130.2, 129.0, 128.9, 128.8, 128.5, 128.4, 128.0, 127.8, 125.7, 81.1, 73.0, 66.0, 42.9, 37.1, 28.0, 21.1.

**HRMS** (ESI+) calcd. For C<sub>31</sub>H<sub>36</sub>NO<sub>3</sub> ([M+H]<sup>+</sup>): 470.2690, found: 470.2697.

## HPLC chromatogram of compound (2*R*,7*S*,*E*)-3i

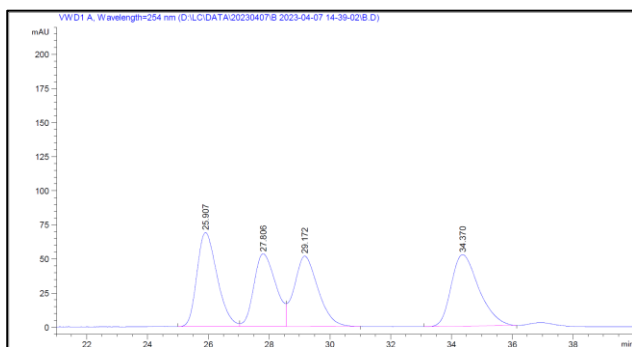

| Peak # | RetTime [min] | Type | Width [min] | Area [mAU*s] | Height [mAU] | Area %  |
|--------|---------------|------|-------------|--------------|--------------|---------|
| 1      | 25.907        | BV   | 0.6941      | 3178.03271   | 68.87778     | 26.5391 |
| 2      | 27.806        | VV   | 0.7500      | 2674.96216   | 53.30546     | 22.3381 |
| 3      | 29.172        | VV R | 0.7896      | 2815.60278   | 51.59161     | 23.5125 |
| 4      | 34.370        | BB   | 0.9142      | 3306.31348   | 52.36954     | 27.6103 |

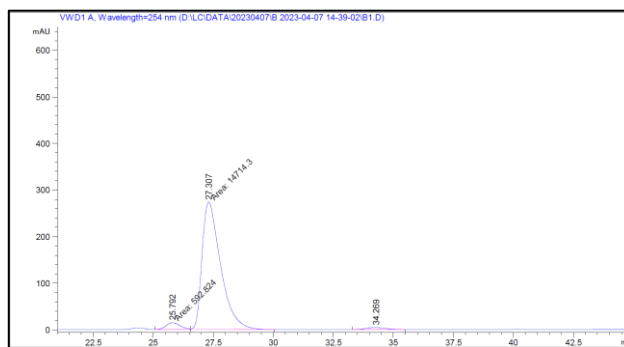

| Peak # | RetTime [min] | Type | Width [min] | Area [mAU*s] | Height [mAU] | Area %  |
|--------|---------------|------|-------------|--------------|--------------|---------|
| 1      | 25.792        | MF   | 0.6774      | 592.82404    | 14.58477     | 3.8072  |
| 2      | 27.307        | FM   | 0.8967      | 1.47143e4    | 273.47815    | 94.4974 |
| 3      | 34.269        | BB   | 0.6827      | 263.98740    | 4.59955      | 1.6954  |

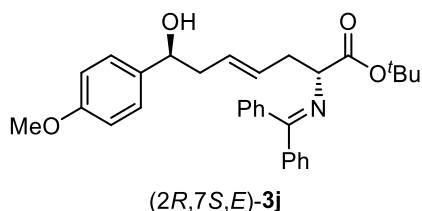

**tert-butyl (2*R*,7*S*,*E*)-2-((diphenylmethylene)amino)-7-hydroxy-7-(4-methoxyphenyl)hept-4-enoate ((2*R*,7*S*,*E*)-3j):** yield (84 mg, 86%); colorless oil;  $[\alpha]_D^{15} = +28.1$  ( $c$  0.51,  $\text{CH}_2\text{Cl}_2$ ); The product was analyzed by HPLC to determine the dr value and the enantiomeric excess: 19:1 dr, > 99% ee (Chiralpak IC, *i*-propanol/hexane = 10/90, flow rate 1.0 mL/min,  $\lambda = 254$  nm);  $t_r = 22.66, 24.13, 26.13$  and 29.62 min.

**$^1\text{H}$  NMR** (400 MHz, Chloroform-*d*)  $\delta$  7.64 (d,  $J = 7.2$  Hz, 2H), 7.46 – 7.41 (m, 3H), 7.40 – 7.36 (m, 1H), 7.35 – 7.30 (m, 2H), 7.24 – 7.20 (m, 2H), 7.17 – 7.10 (m, 2H), 6.83 (d,  $J = 8.0$  Hz, 2H), 5.54 – 5.42 (m, 2H), 4.58 (dd,  $J = 7.8, 5.0$  Hz, 1H), 3.98 (dd,  $J = 7.0, 5.4$  Hz, 1H), 3.78 (s, 3H), 2.66 – 2.54 (m, 2H), 2.45 – 2.33 (m, 2H), 1.44 (s, 9H).

**$^{13}\text{C}$  NMR** (101 MHz, Chloroform-*d*)  $\delta$  170.9, 170.1, 158.9, 139.6, 136.6, 136.1, 130.4, 130.2, 128.9, 128.8, 128.6, 128.4, 128.0, 127.8, 127.0, 113.7, 81.1, 72.7, 66.0, 55.2, 42.9, 37.1, 28.0.

**HRMS** (ESI+) calcd. For  $\text{C}_{31}\text{H}_{36}\text{NO}_4$  ( $[\text{M}+\text{H}]^+$ ): 486.2639, found: 486.2641.



## HPLC chromatogram of compound (2*R*,7*S*,*E*)-3j

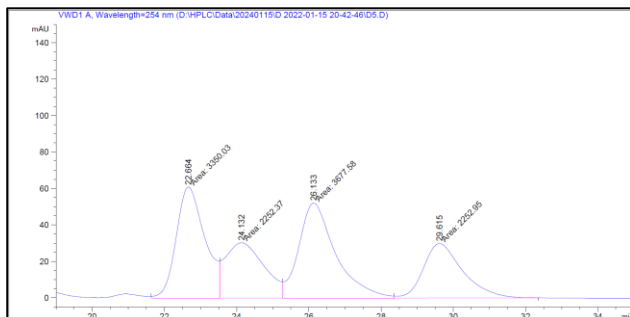

| Peak # | RetTime [min] | Type | Width [min] | Area [mAU*s] | Height [mAU] | Area %  |
|--------|---------------|------|-------------|--------------|--------------|---------|
| 1      | 22.664        | MF   | 0.9178      | 3350.02563   | 60.83315     | 29.0475 |
| 2      | 24.132        | FM   | 1.2391      | 2252.37036   | 30.29615     | 19.5299 |
| 3      | 26.133        | MF   | 1.1783      | 3677.58057   | 52.02008     | 31.8877 |
| 4      | 29.615        | FM   | 1.2585      | 2252.94653   | 29.83608     | 19.5349 |

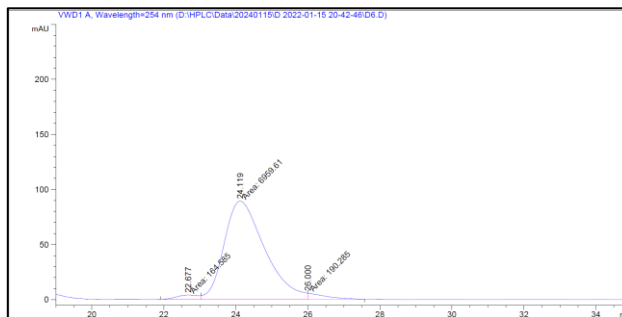

| Peak # | RetTime [min] | Type | Width [min] | Area [mAU*s] | Height [mAU] | Area %  |
|--------|---------------|------|-------------|--------------|--------------|---------|
| 1      | 22.677        | MF   | 0.7042      | 164.58478    | 3.89514      | 2.2501  |
| 2      | 24.119        | MF   | 1.3014      | 6959.60693   | 89.13271     | 95.1484 |
| 3      | 26.000        | FM   | 0.5723      | 190.28525    | 5.54150      | 2.6015  |

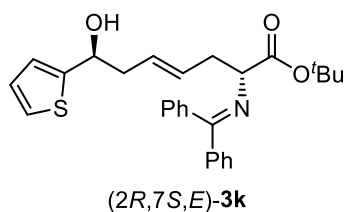

**tert-butyl (2*R*,7*S*,*E*)-2-((diphenylmethylene)amino)-7-hydroxy-7-(thiophen-2-yl)hept-4-enoate ((2*R*,7*S*,*E*)-3k):** yield (81 mg, 88%); colorless oil;  $[\alpha]_D^{15} = +45.4$  (*c* 0.48, CH<sub>2</sub>Cl<sub>2</sub>); The product was analyzed by HPLC to determine the dr value and the enantiomeric excess: 4:1 dr, > 99% ee (Chiralpak IC, *i*-propanol/hexane = 5/95, flow rate 1.0 mL/min,  $\lambda = 254$  nm);  $t_r = 31.16, 35.55, 37.47$  and 51.84 min.

**<sup>1</sup>H NMR** (400 MHz, Chloroform-*d*)  $\delta$  7.58 – 7.54 (m, 2H), 7.37 – 7.23 (m, 6H), 7.14 – 7.10 (m, 1H), 7.09 – 7.05 (m, 2H), 6.85 – 6.81 (m, 2H), 5.50 – 5.39 (m, 2H), 4.81 (dd, *J* = 7.6, 4.8 Hz, 1H), 3.91 (dd, *J* = 6.8, 5.6 Hz, 1H), 2.55 – 2.49 (m, 2H), 2.48 – 2.39 (m, 2H), 1.36 (s, 9H).

**<sup>13</sup>C NMR** (101 MHz, Chloroform-*d*)  $\delta$  170.9, 170.2, 147.9, 139.5, 136.6, 131.0, 130.3, 128.8, 128.6, 128.4, 128.1, 128.0, 127.8, 126.5, 124.3, 123.4, 81.4, 69.3, 65.9, 42.9, 37.1, 28.0.

**HRMS** (ESI+) calcd. For C<sub>28</sub>H<sub>32</sub>NO<sub>3</sub>S ([*M*+*H*]<sup>+</sup>): 462.2097, found: 462.2100.

## HPLC chromatogram of compound (2*R*,7*S*,*E*)-3k

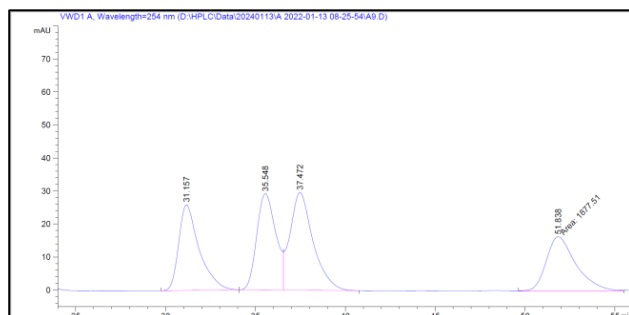

| Peak # | RetTime [min] | Type | Width [min] | Area [mAU*s] | Height [mAU] | Area %  |
|--------|---------------|------|-------------|--------------|--------------|---------|
| 1      | 31.157        | BB   | 1.1441      | 2053.90918   | 25.98606     | 23.5017 |
| 2      | 35.548        | BV   | 1.1126      | 2153.87036   | 29.19880     | 24.6455 |
| 3      | 37.472        | VB   | 1.2723      | 2654.13403   | 29.65247     | 30.3697 |
| 4      | 51.838        | MF   | 1.9049      | 1877.50952   | 16.42696     | 21.4832 |

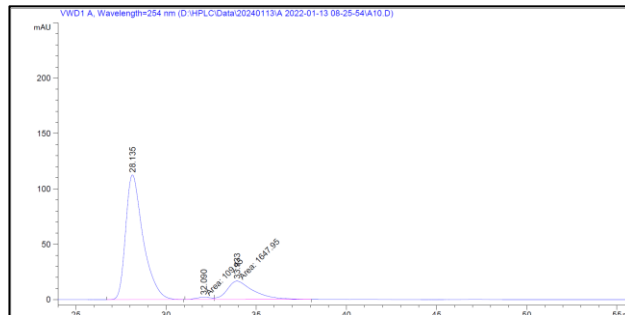

| Peak # | RetTime [min] | Type | Width [min] | Area [mAU*s] | Height [mAU] | Area %  |
|--------|---------------|------|-------------|--------------|--------------|---------|
| 1      | 28.135        | BB   | 1.0004      | 7548.41748   | 112.55023    | 81.1150 |
| 2      | 32.090        | MF   | 0.9747      | 109.44960    | 1.87144      | 1.1761  |
| 3      | 33.933        | FM   | 1.6682      | 1647.95313   | 16.46454     | 17.7088 |

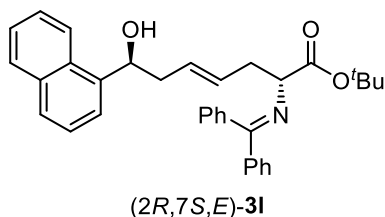

**tert-butyl (2*R*,7*S*,*E*)-2-((diphenylmethylene)amino)-7-hydroxy-7-(naphthalen-1-yl)hept-4-enoate ((2*R*,7*S*,*E*)-3l):** yield (83 mg, 82%); colorless oil;  $[\alpha]^{15}_D = +4.1$  ( $c$  0.51,  $\text{CH}_2\text{Cl}_2$ ); The product was analyzed by HPLC to determine the dr value and the enantiomeric excess: 17:1 dr, > 99% ee (Chiralpak IC, *i*-propanol/hexane = 10/90, flow rate 1.0 mL/min,  $\lambda = 254$  nm);  $t_r = 14.21, 15.59, 17.97$  and 26.85 min.

**$^1\text{H}$  NMR** (400 MHz, Chloroform-*d*)  $\delta$  8.03 – 7.95 (m, 1H), 7.87 – 7.82 (m, 1H), 7.77 – 7.72 (m, 1H), 7.68 – 7.59 (m, 3H), 7.47 – 7.40 (m, 6H), 7.39 – 7.30 (m, 3H), 7.19 – 7.13 (m, 2H), 5.65 – 5.51 (m, 2H), 5.40 (dd,  $J = 8.8, 3.6$  Hz, 1H), 4.02 (dd,  $J = 6.4, 6.4$  Hz, 1H), 2.66 – 2.61 (m, 2H), 2.54 – 2.39 (m, 2H), 1.45 (s, 9H).

**$^{13}\text{C}$  NMR** (101 MHz, Chloroform-*d*)  $\delta$  170.9, 170.2, 139.5, 139.4, 136.6, 133.7, 130.5, 130.3, 130.2, 129.2, 128.9, 128.8, 128.6, 128.5, 128.0, 127.8, 127.7, 125.9, 125.4, 125.4, 123.0, 122.8, 81.2, 69.9, 66.0, 42.0, 37.1, 28.0.

**HRMS** (ESI+) calcd. For  $\text{C}_{34}\text{H}_{36}\text{NO}_3$  ( $[\text{M}+\text{H}]^+$ ):506.2690, found: 506.2694.

## HPLC chromatogram of compound (2*R*,7*S*,*E*)-3l

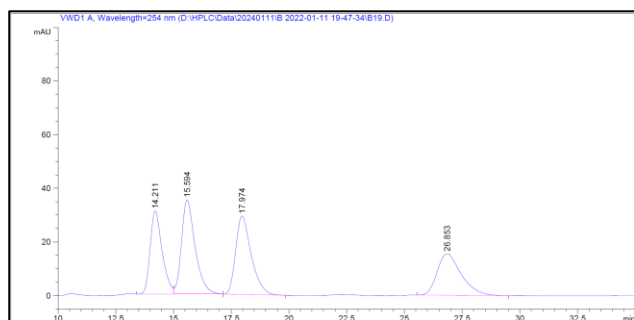

| Peak # | RetTime [min] | Type | Width [min] | Area [mAU*s] | Height [mAU] | Area %  |
|--------|---------------|------|-------------|--------------|--------------|---------|
| 1      | 14.211        | BV   | 0.5389      | 1112.84277   | 30.99708     | 22.0764 |
| 2      | 15.594        | VB   | 0.6128      | 1443.15125   | 35.16558     | 28.6290 |
| 3      | 17.974        | BB   | 0.7040      | 1367.06213   | 29.21193     | 27.1196 |
| 4      | 26.853        | BB   | 1.0606      | 1117.81140   | 15.51426     | 22.1750 |

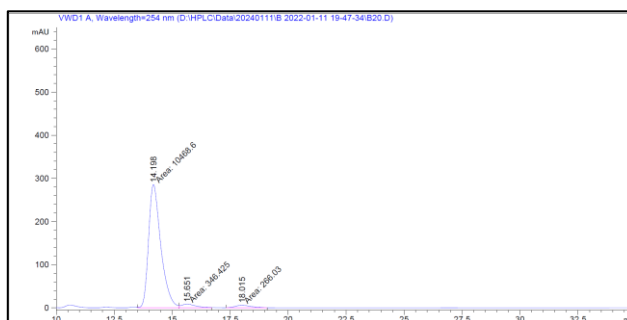

| Peak # | RetTime [min] | Type | Width [min] | Area [mAU*s] | Height [mAU] | Area %  |
|--------|---------------|------|-------------|--------------|--------------|---------|
| 1      | 14.198        | FM   | 0.6112      | 1.04686e4    | 285.47696    | 94.4729 |
| 2      | 15.651        | MF   | 0.7044      | 346.42462    | 8.19645      | 3.1263  |
| 3      | 18.015        | MF   | 0.7661      | 266.02963    | 5.78735      | 2.4008  |

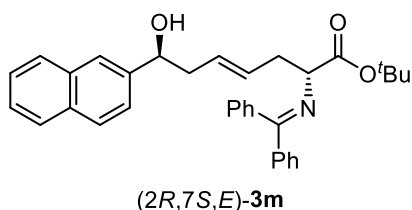

**tert-butyl (2*R*,7*S*,*E*)-2-((diphenylmethylene)amino)-7-hydroxy-7-(naphthalen-2-yl)hept-4-enoate ((2*R*,7*S*,*E*)-3m):** yield (77 mg, 76%); colorless oil;  $[\alpha]_D^{15} = +6.3$  ( $c$  0.53,  $\text{CH}_2\text{Cl}_2$ ); The product was analyzed by HPLC to determine the dr value and the enantiomeric excess: 13:1 dr, > 99% ee (Chiralpak IE, *i*-propanol/hexane = 10/90, flow rate 1.0 mL/min,  $\lambda = 254$  nm);  $t_r = 18.25, 19.37, 20.79$  and 22.73 min.

**$^1\text{H}$  NMR** (400 MHz, Chloroform-*d*)  $\delta$  7.82 – 7.76 (m, 4H), 7.67 – 7.62 (m, 2H), 7.46 – 7.37 (m, 7H), 7.35 – 7.30 (m, 2H), 7.16 – 7.11 (m, 2H), 5.59 – 5.46 (m, 2H), 4.80 (dd,  $J = 8.2, 4.2$  Hz, 1H), 3.99 (dd,  $J = 7.0, 5.4$  Hz, 1H), 2.65 – 2.57 (m, 2H), 2.57 – 2.51 (m, 1H), 2.48 – 2.42 (m, 1H), 1.44 (s, 9H).

**$^{13}\text{C}$  NMR** (101 MHz, Chloroform-*d*)  $\delta$  170.9, 170.2, 141.3, 139.5, 136.6, 133.2, 132.8, 130.7, 130.3, 128.8, 128.7, 128.6, 128.4, 128.0, 127.9, 127.8, 127.8, 127.6, 126.0, 125.7, 124.3, 124.1, 81.2, 73.1, 65.9, 42.9, 37.1, 28.0.

**HRMS** (ESI+) calcd. For  $\text{C}_{34}\text{H}_{36}\text{NO}_3$  ( $[\text{M}+\text{H}]^+$ ):506.2690, found: 506.2697.

## HPLC chromatogram of compound (2*R*,7*S*,*E*)-3m

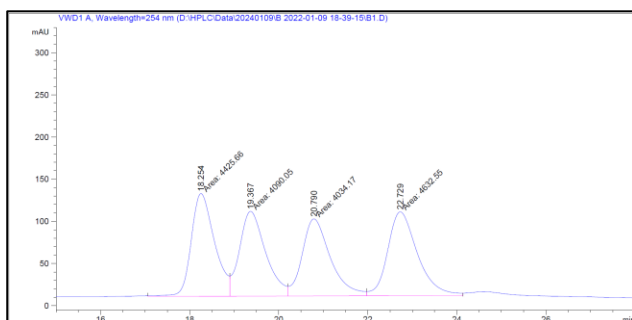

| Peak # | RetTime [min] | Type | Width [min] | Area [mAU*s] | Height [mAU] | Area %  |
|--------|---------------|------|-------------|--------------|--------------|---------|
| 1      | 18.254        | MF   | 0.6059      | 4425.66406   | 121.72798    | 25.7569 |
| 2      | 19.367        | MF   | 0.6782      | 4090.05396   | 100.51357    | 23.8037 |
| 3      | 20.790        | MF   | 0.7357      | 4034.16553   | 91.39146     | 23.4784 |
| 4      | 22.729        | FM   | 0.7762      | 4632.55078   | 99.46693     | 26.9610 |

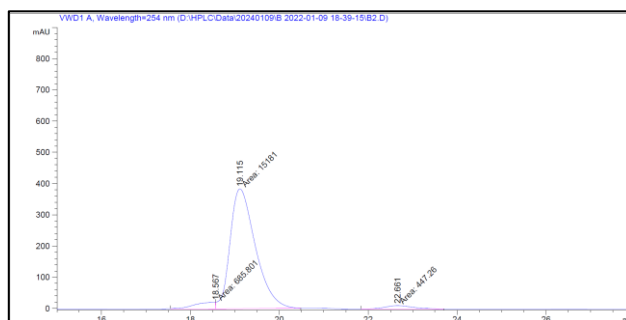

| Peak # | RetTime [min] | Type | Width [min] | Area [mAU*s] | Height [mAU] | Area %  |
|--------|---------------|------|-------------|--------------|--------------|---------|
| 1      | 18.567        | MF   | 0.5434      | 685.80139    | 21.03318     | 4.2037  |
| 2      | 19.115        | MF   | 0.6598      | 1.51810e4    | 383.45770    | 93.0547 |
| 3      | 22.661        | MF   | 0.7137      | 447.25961    | 10.44433     | 2.7416  |

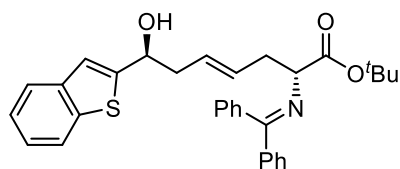

(2*R*,7*S*,*E*)-3n

**tert-butyl (2*R*,7*S*,*E*)-7-(benzo[*b*]thiophen-2-yl)-2-((diphenylmethylene)amino)-7-hydroxyhept-4-enoate ((2*R*,7*S*,*E*)-3n):** yield (85 mg, 87%); colorless oil;  $[\alpha]_D^{15} = +17.2$  (*c* 0.50, CH<sub>2</sub>Cl<sub>2</sub>); The product was analyzed by HPLC to determine the dr value and the enantiomeric excess: 6:1 dr, > 99% ee (Chiralpak IE, *i*-propanol/hexane = 10/90, flow rate 1.0 mL/min,  $\lambda = 254$  nm);  $t_r = 17.02, 18.66, 19.62$  and  $21.63$  min.

**<sup>1</sup>H NMR** (400 MHz, Chloroform-*d*)  $\delta$  7.72 – 7.68 (m, 1H), 7.60 – 7.54 (m, 3H), 7.36 – 7.29 (m, 4H), 7.27 – 7.19 (m, 4H), 7.07 – 7.02 (m, 3H), 5.55 – 5.40 (m, 2H), 4.87 (dd, *J* = 7.6, 4.4 Hz, 1H), 3.91 (dd, *J* = 6.8, 5.6 Hz, 1H), 2.55 – 2.52 (m, 2H), 2.51 – 2.43 (m, 2H), 1.35 (s, 9H).

**<sup>13</sup>C NMR** (101 MHz, Chloroform-*d*)  $\delta$  170.9, 170.2, 148.6, 139.5, 139.3, 136.6, 131.38, 131.35, 130.3, 128.8, 128.6, 128.5, 128.0, 127.8, 127.7, 124.2, 124.0, 123.4, 122.4, 119.9, 81.2, 69.7, 65.9, 42.5, 37.1, 28.0.

**HRMS** (ESI+) calcd. For C<sub>32</sub>H<sub>34</sub>NO<sub>3</sub>S ([*M*+*H*]<sup>+</sup>): 512.2254, found: 512.2255.

## HPLC chromatogram of compound (2*R*,7*S*,*E*)-3*n*

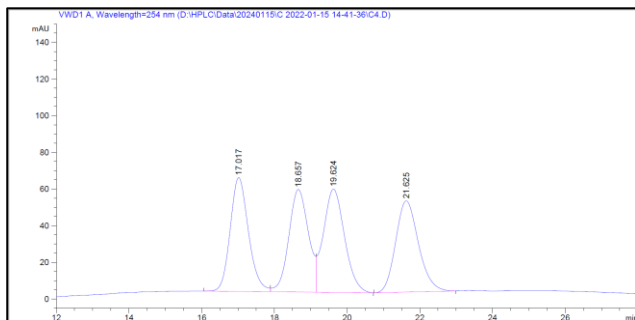

| Peak # | RetTime [min] | Type | Width [min] | Area [mAU*s] | Height [mAU] | Area %  |
|--------|---------------|------|-------------|--------------|--------------|---------|
| 1      | 17.017        | BV   | 0.5347      | 2170.81860   | 62.12012     | 24.8817 |
| 2      | 18.657        | VV   | 0.5731      | 2095.96045   | 55.94752     | 24.0236 |
| 3      | 19.624        | VB   | 0.6149      | 2289.83154   | 56.36955     | 26.2458 |
| 4      | 21.625        | BB   | 0.6723      | 2167.96558   | 49.75972     | 24.8490 |

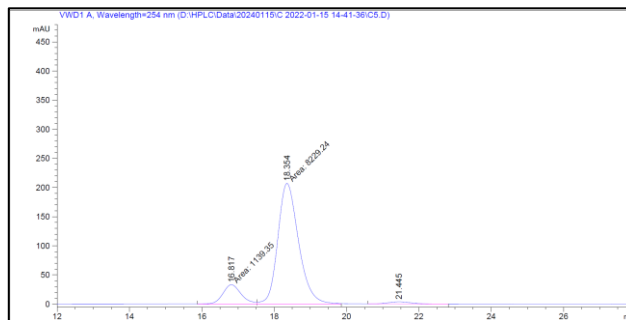

| Peak # | RetTime [min] | Type | Width [min] | Area [mAU*s] | Height [mAU] | Area %  |
|--------|---------------|------|-------------|--------------|--------------|---------|
| 1      | 16.817        | MF   | 0.5770      | 1139.34851   | 32.91150     | 11.9556 |
| 2      | 18.354        | MF   | 0.6635      | 8229.24219   | 206.70213    | 86.3522 |
| 3      | 21.445        | BB   | 0.6324      | 161.27008    | 3.75248      | 1.6923  |

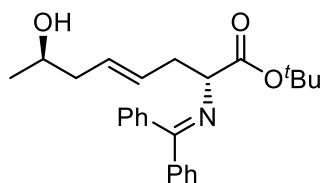

(2*R*,7*R*,*E*)-3*o*

**tert-butyl (2*R*,7*R*,*E*)-2-((diphenylmethylene)amino)-7-hydroxyoct-4-enoate ((2*R*,7*R*,*E*)-3*o*):**

yield (62 mg, 79%); colorless oil;  $[\alpha]_D^{25} = +78.0$  ( $c$  0.42,  $\text{CH}_2\text{Cl}_2$ ); The product was analyzed by HPLC to determine the dr value and the enantiomeric excess: 1.7:1 dr, 98% ee (Chiralpak AD-H, *i*-propanol/hexane = 5/95, flow rate 1.0 mL/min,  $\lambda = 254$  nm);  $t_r = 6.06, 6.67, 7.88$  and 9.97 min.

**$^1\text{H NMR}$**  (400 MHz, Chloroform-*d*)  $\delta$  7.67 – 7.58 (m, 2H), 7.48 – 7.39 (m, 3H), 7.39 – 7.28 (m, 3H), 7.21 – 7.09 (d,  $J = 6.6$  Hz, 2H), 5.53 – 5.37 (m, 2H), 4.05 – 3.92 (m, 1H), 3.82 – 3.65 (m, 1H), 2.70 – 2.51 (m, 2H), 2.22 – 2.11 (m, 1H), 2.11 – 2.00 (m, 1H), 1.442 (s, 2.83H, minor), 1.436 (s, 6.02H, major), 1.14 (d,  $J = 6.4$  Hz, 3H).

**$^{13}\text{C NMR}$**  (101 MHz, Chloroform-*d*)  $\delta$  171.0, 170.9, 170.11, 170.06, 139.59, 139.57, 136.6, 130.2, 130.1, 130.0, 129.1, 129.0, 128.7, 128.55, 128.52, 128.43, 128.41, 128.0, 127.81, 127.77, 81.1, 81.0, 67.0, 66.9, 66.0, 42.5, 37.1, 28.1, 22.6.

**HRMS** (ESI+) calcd. For  $\text{C}_{25}\text{H}_{32}\text{NO}_3$  ( $[\text{M}+\text{H}]^+$ ): 394.2377, found: 394.2378.

## HPLC chromatogram of compound (2*R*,7*R*,*E*)-3o

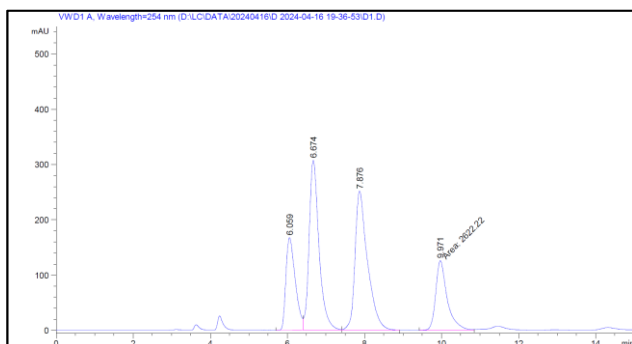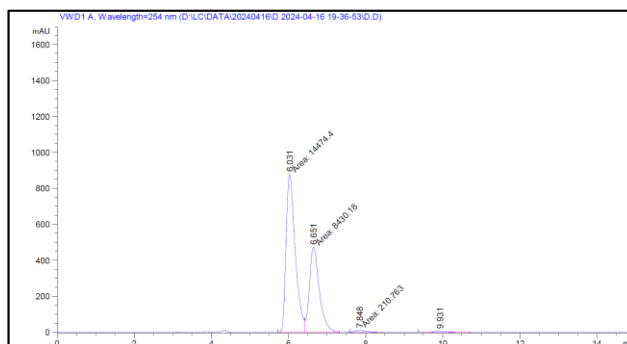

| Peak # | RetTime [min] | Type | Width [min] | Area [mAU*s] | Height [mAU] | Area %  |
|--------|---------------|------|-------------|--------------|--------------|---------|
| 1      | 6.059         | BV   | 0.2591      | 2837.15674   | 167.20161    | 17.0600 |
| 2      | 6.674         | VV   | 0.2688      | 5511.17139   | 307.41818    | 33.1390 |
| 3      | 7.876         | VB   | 0.3251      | 5659.89893   | 251.51981    | 34.0334 |
| 4      | 9.971         | MF   | 0.3471      | 2622.21802   | 125.90105    | 15.7676 |

| Peak # | RetTime [min] | Type | Width [min] | Area [mAU*s] | Height [mAU] | Area %  |
|--------|---------------|------|-------------|--------------|--------------|---------|
| 1      | 6.031         | MF   | 0.2742      | 1.44744e4    | 879.72296    | 62.2570 |
| 2      | 6.651         | FM   | 0.2967      | 8430.17676   | 473.49783    | 36.2596 |
| 3      | 7.848         | FM   | 0.3423      | 210.76344    | 10.26361     | 0.9065  |
| 4      | 9.931         | BB   | 0.3222      | 134.12590    | 6.09728      | 0.5769  |

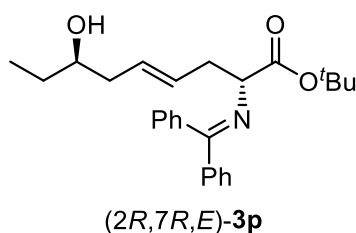

**tert-butyl (2*R*,7*R*,*E*)-2-((diphenylmethylene)amino)-7-hydroxynon-4-enoate ((2*R*,7*R*,*E*)-3p):** yield (57 mg, 70%); colorless oil;  $[\alpha]_D^{25} = +57.0$  ( $c$  0.41,  $\text{CH}_2\text{Cl}_2$ ); The product was analyzed by HPLC to determine the dr value and the enantiomeric excess: 1:1 dr, 91% ee (Chiralpak IC, *i*-propanol/hexane = 5/95, flow rate 1.0 mL/min,  $\lambda = 254$  nm);  $t_r = 18.62, 20.28, 22.70$  and  $27.13$  min.  $^1\text{H NMR}$  (400 MHz, Chloroform-*d*)  $\delta$  7.68 – 7.60 (m, 2H), 7.48 – 7.41 (m, 3H), 7.39 – 7.28 (m, 3H), 7.20 – 7.12 (m, 2H), 5.56 – 5.39 (m, 2H), 4.05 – 3.94 (m, 1H), 3.53 – 3.39 (m, 1H), 2.68 – 2.46 (m, 2H), 2.26 – 2.18 (m, 1H), 2.10 – 1.99 (m, 1H), 1.50 – 1.46 (m, 2H), 1.443 (s, 4.15H, minor), 1.437 (s, 5.08H, major), 0.93 – 0.86 (m, 3H).  $^{13}\text{C NMR}$  (101 MHz, Chloroform-*d*)  $\delta$  170.99, 170.96, 170.10, 170.05, 139.6, 136.6, 130.2, 129.9, 129.2, 129.0, 128.8, 128.5, 128.43, 128.41, 128.0, 127.82, 127.79, 81.07, 81.03, 72.1, 72.0, 66.1, 66.0, 40.3, 40.2, 37.2, 37.1, 29.4, 28.1, 10.0. **HRMS** (ESI+) calcd. For  $\text{C}_{26}\text{H}_{34}\text{NO}_3$  ( $[\text{M}+\text{H}]^+$ ): 408.2533, found: 408.2534.

## HPLC chromatogram of compound (2*R*,7*R*,*E*)-3p

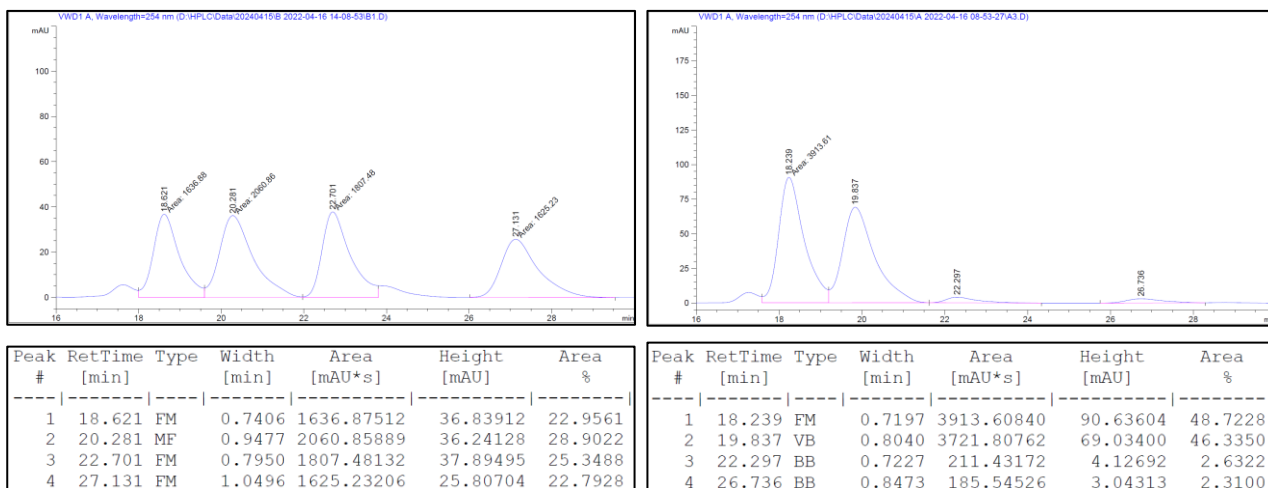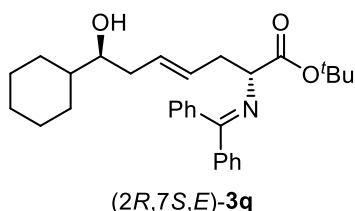

**tert-butyl (2*R*,7*S*,*E*)-7-cyclohexyl-2-((diphenylmethylene)amino)-7-hydroxyhept-4-enoate ((2*R*,7*S*,*E*)-3q):** yield (74 mg, 80%); colorless oil;  $[\alpha]_D^{20} = +30.4$  ( $c$  0.56,  $\text{CH}_2\text{Cl}_2$ ); The product was analyzed by HPLC to determine the dr value and the enantiomeric excess: 6:1 dr, > 99% ee (Chiralpak IC + Chiralpak IE, *i*-propanol/hexane = 10/90, flow rate 0.75 mL/min,  $\lambda = 254$  nm);  $t_r = 28.24, 30.19, 33.25$  and  $35.83$  min.

**<sup>1</sup>H NMR** (400 MHz, Chloroform-*d*)  $\delta$  7.67 – 7.61 (m, 2H), 7.47 – 7.41 (m, 3H), 7.39 – 7.29 (m, 3H), 7.19 – 7.13 (m, 2H), 5.53 – 5.40 (m, 2H), 3.98 (dd,  $J = 6.8, 5.6$  Hz, 1H), 3.33 – 3.23 (m, 1H), 2.67 – 2.54 (m, 2H), 2.26 – 2.19 (m, 1H), 2.08 – 1.98 (m, 1H), 1.84 – 1.61 (m, 7H), 1.44 (s, 9H), 1.20 – 1.14 (m, 2H), 1.07 – 0.95 (m, 2H).

**<sup>13</sup>C NMR** (101 MHz, Chloroform-*d*)  $\delta$  170.9, 170.1, 139.6, 136.6, 130.2, 129.9, 129.7, 128.8, 128.5, 128.4, 128.0, 127.8, 81.1, 74.7, 66.0, 42.9, 37.5, 37.2, 29.1, 28.2, 28.1, 26.5, 26.2, 26.1.

**HRMS** (ESI+) calcd. For  $\text{C}_{30}\text{H}_{40}\text{NO}_3$  ( $[\text{M}+\text{H}]^+$ ): 462.3003, found: 462.3010.

## HPLC chromatogram of compound (2*R*,7*S*,*E*)-3q

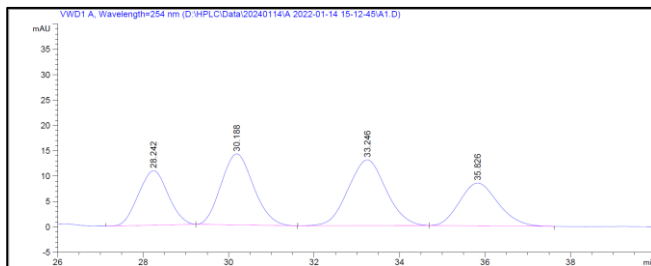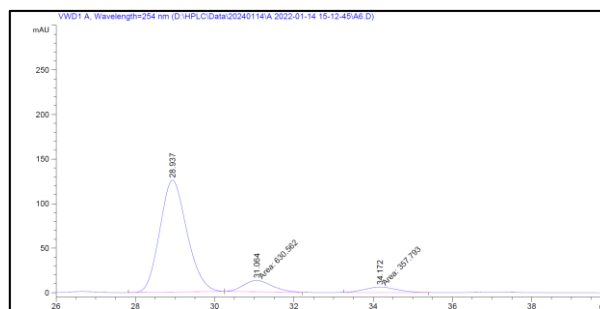

| Peak # | RetTime [min] | Type | Width [min] | Area [mAU*s] | Height [mAU] | Area %  |
|--------|---------------|------|-------------|--------------|--------------|---------|
| 1      | 28.242        | BB   | 0.7407      | 518.53638    | 10.75115     | 20.0971 |
| 2      | 30.188        | BB   | 0.7958      | 736.80237    | 13.98249     | 28.5566 |
| 3      | 33.246        | BB   | 0.9167      | 798.75641    | 12.96627     | 30.9578 |
| 4      | 35.826        | BB   | 0.9223      | 526.05438    | 8.42655      | 20.3885 |

| Peak # | RetTime [min] | Type | Width [min] | Area [mAU*s] | Height [mAU] | Area %  |
|--------|---------------|------|-------------|--------------|--------------|---------|
| 1      | 28.937        | BB   | 0.7279      | 5970.22949   | 125.52958    | 85.7966 |
| 2      | 31.064        | MF   | 0.8330      | 630.56183    | 12.61577     | 9.0616  |
| 3      | 34.172        | FM   | 0.9700      | 357.79272    | 6.14756      | 5.1417  |

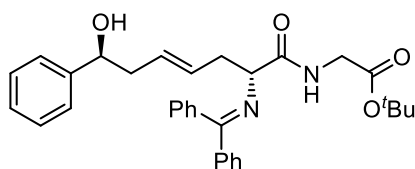

(2*R*,7*S*,*E*)-Gly-Gly-3r

**tert-butyl ((2*R*,7*S*,*E*)-2-((diphenylmethylene)amino)-7-hydroxy-7-phenylhept-4-enoyl)glycinate ((2*R*,7*S*,*E*)-Gly-Gly-3r):** yield (78 mg, 76%); colorless oil;  $[\alpha]_D^{20} = -85.0$  ( $c$  0.62,  $\text{CH}_2\text{Cl}_2$ ); The product was analyzed by HPLC to determine the dr value and the enantiomeric excess: > 20:1 dr, > 99% ee (Chiralcel OD-H, *i*-propanol/hexane = 10/90, flow rate 1.0 mL/min,  $\lambda = 254$  nm);  $t_r = 9.77$ , 10.64, 12.47 and 13.94 min.

**$^1\text{H}$  NMR** (400 MHz, Chloroform-*d*)  $\delta$  7.70 – 7.66 (m, 2H), 7.53 – 7.48 (m, 1H), 7.46 – 7.41 (m, 4H), 7.40 – 7.35 (m, 2H), 7.32 – 7.27 (m, 4H), 7.24 – 7.20 (m, 1H), 7.14 – 7.09 (m, 2H), 5.54 – 5.38 (m, 2H), 4.59 (dd,  $J = 9.0, 3.8$  Hz, 1H), 4.11 – 4.03 (m, 2H), 3.92 (dd,  $J = 18.0, 5.2$  Hz, 1H), 2.54 – 2.41 (m, 3H), 2.33 – 2.24 (m, 1H), 1.48 (s, 9H).

**$^{13}\text{C}$  NMR** (101 MHz, Chloroform-*d*)  $\delta$  172.9, 169.5, 168.8, 144.1, 139.1, 135.6, 130.7, 130.0, 129.3, 128.9, 128.73, 128.67, 128.2, 127.6, 127.1, 125.6, 82.0, 72.6, 65.8, 43.4, 41.6, 39.1, 28.0.

**HRMS** (ESI+) calcd. For  $\text{C}_{32}\text{H}_{37}\text{N}_2\text{O}_4$  ( $[\text{M}+\text{H}]^+$ ): 513.2748, found: 513.2749.



## HPLC chromatogram of compound (2R,7S,E)-Gly-Gly-3r

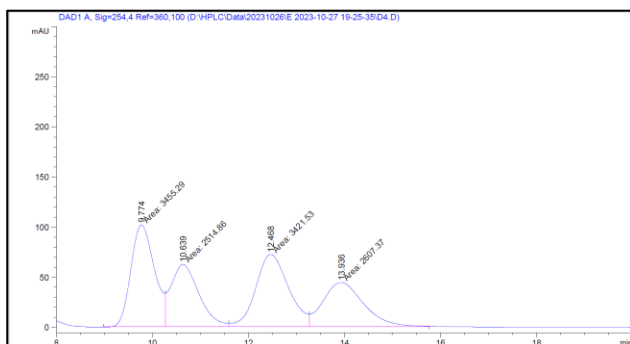

| Peak # | RetTime [min] | Type | Width [min] | Area [mAU*s] | Height [mAU] | Area %  |
|--------|---------------|------|-------------|--------------|--------------|---------|
| 1      | 9.774         | MF   | 0.5676      | 3455.29468   | 101.46545    | 28.7964 |
| 2      | 10.639        | FM   | 0.6758      | 2514.85864   | 62.02573     | 20.9588 |
| 3      | 12.468        | FM   | 0.7920      | 3421.53467   | 72.00500     | 28.5150 |
| 4      | 13.936        | FM   | 0.9849      | 2607.36938   | 44.12298     | 21.7298 |

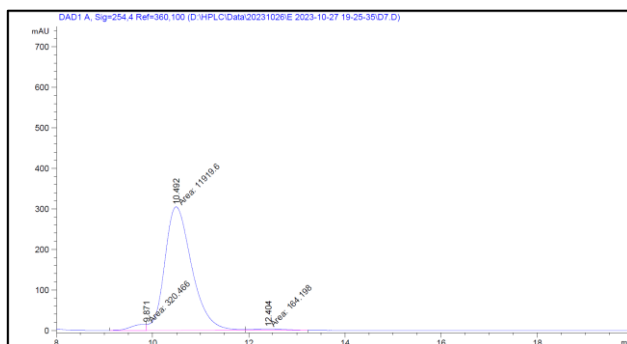

| Peak # | RetTime [min] | Type | Width [min] | Area [mAU*s] | Height [mAU] | Area %  |
|--------|---------------|------|-------------|--------------|--------------|---------|
| 1      | 9.871         | MF   | 0.3590      | 320.46637    | 14.87823     | 2.5835  |
| 2      | 10.492        | FM   | 0.6514      | 1.19196e4    | 304.97012    | 96.0928 |
| 3      | 12.404        | FM   | 0.7856      | 164.19832    | 3.48343      | 1.3237  |

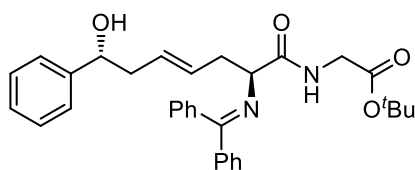

(2S,7R,E)-Gly-Gly-3r

*tert*-butyl ((2R,7S,E)-2-((diphenylmethylene)amino)-7-hydroxy-7-phenylhept-4-enoyl)glycinate ((2S,7R,E)-Gly-Gly-3r): yield (79 mg, 77%); colorless oil;  $[\alpha]_D^{20} = +86.1$  ( $c$  0.45,  $\text{CH}_2\text{Cl}_2$ ); The product was analyzed by HPLC to determine the dr value and the enantiomeric excess: > 20:1 dr, > 99% ee (Chiralcel OD-H, *i*-propanol/hexane = 10/90, flow rate 1.0 mL/min,  $\lambda = 254$  nm);  $t_r = 9.77$ , 10.64, 12.47 and 13.94 min.

HRMS (ESI+) calcd. For  $\text{C}_{32}\text{H}_{37}\text{N}_2\text{O}_4$  ( $[\text{M}+\text{H}]^+$ ): 513.2748, found: 513.2747.

## HPLC chromatogram of compound (2S,7R,E)-Gly-Gly-3r

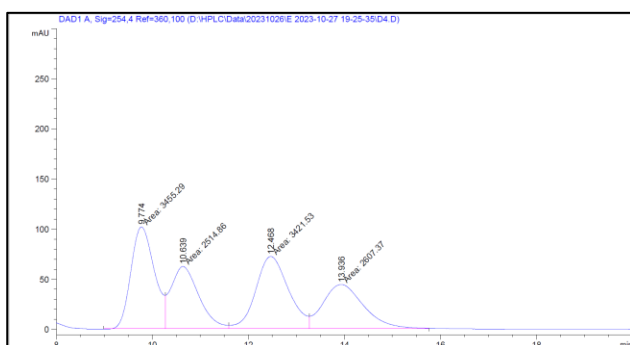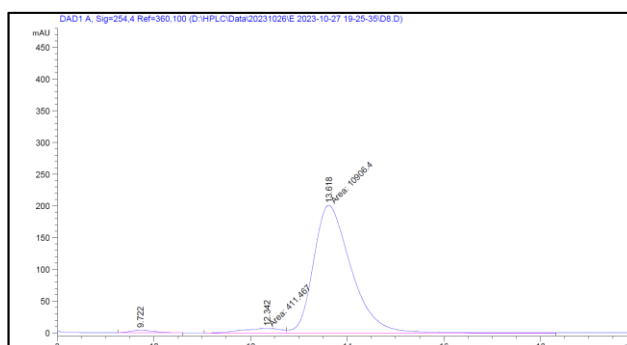

| Peak # | RetTime [min] | Type | Width [min] | Area [mAU*s] | Height [mAU] | Area %  |
|--------|---------------|------|-------------|--------------|--------------|---------|
| 1      | 9.774         | MF   | 0.5676      | 3455.29468   | 101.46545    | 28.7964 |
| 2      | 10.639        | FM   | 0.6758      | 2514.85864   | 62.02573     | 20.9588 |
| 3      | 12.468        | FM   | 0.7920      | 3421.53467   | 72.00500     | 28.5150 |
| 4      | 13.936        | FM   | 0.9849      | 2607.36938   | 44.12298     | 21.7298 |

| Peak # | RetTime [min] | Type | Width [min] | Area [mAU*s] | Height [mAU] | Area %  |
|--------|---------------|------|-------------|--------------|--------------|---------|
| 1      | 9.722         | BB   | 0.3939      | 128.06172    | 3.82186      | 1.1188  |
| 2      | 12.342        | MF   | 0.9489      | 411.46701    | 7.22736      | 3.5949  |
| 3      | 13.618        | FM   | 0.9027      | 1.09064e4    | 201.37543    | 95.2863 |

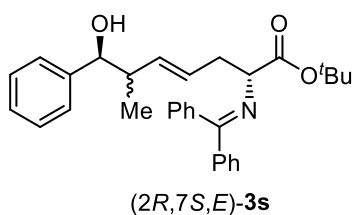

**tert-butyl (2R,7S,E)-2-((diphenylmethylene)amino)-7-hydroxy-6-methyl-7-phenylhept-4-enoate ((2R,7S,E)-3s):** yield (70 mg, 75%); colorless oil;  $[\alpha]_D^{25} = +12.1$  (*c* 0.42, CH<sub>2</sub>Cl<sub>2</sub>); The product was analyzed by <sup>1</sup>H NMR to determine the dr value: 1.3:1 dr.

<sup>1</sup>H NMR (400 MHz, Chloroform-*d*)  $\delta$  7.69 – 7.59 (m, 2H), 7.49 – 7.40 (m, 3H), 7.39 – 7.28 (m, 5H), 7.25 – 7.11 (m, 5H), 5.64 – 5.51 (m, 0.59H, minor), 5.49 – 5.35 (m, 1.42H, major), 4.56 (d, *J* = 5.2 Hz, 0.38H, minor), 4.22 (d, *J* = 8.4 Hz, 0.57H, major), 4.02 (dd, *J* = 7.2, 5.6 Hz, 0.58H, major), 3.96 (dd, *J* = 7.2, 5.6 Hz, 0.42H, minor), 2.67 – 2.52 (m, 2H), 2.46 – 2.28 (m, 1H), 1.45 (s, 4.52H, major), 1.44 (s, 4.02H, minor), 0.90 (d, *J* = 6.8 Hz, 1.29H), 0.77 (d, *J* = 6.8 Hz, 1.72H).

<sup>13</sup>C NMR (101 MHz, Chloroform-*d*)  $\delta$  170.9, 170.1, 170.0, 142.4, 142.3, 139.61, 139.57, 136.6, 135.3, 134.7, 130.3, 130.2, 129.1, 128.8, 128.6, 128.54, 128.51, 128.4, 128.1, 128.0, 127.9, 127.8, 127.7, 127.54, 127.49, 127.1, 127.0, 126.4, 81.2, 81.1, 77.9, 76.9, 66.2, 65.9, 45.8, 43.7, 37.3, 37.1, 28.1, 16.8, 14.0.

**HRMS** (ESI+) calcd. For C<sub>31</sub>H<sub>36</sub>NO<sub>3</sub> ([M+H]<sup>+</sup>): 470.2690, found: 470.2689.

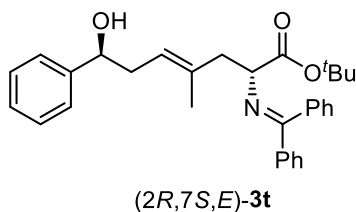

**tert-butyl (2R,7S,E)-2-((diphenylmethylene)amino)-7-hydroxy-4-methyl-7-phenylhept-4-enoate ((2R,7S,E)-3t):** yield (67 mg, 71%); colorless oil;  $[\alpha]_D^{25} = +54.4$  (*c* 0.41, CH<sub>2</sub>Cl<sub>2</sub>); The product was analyzed by HPLC to determine the dr value and the enantiomeric excess: > 20:1 dr, > 99% ee

(Chiralpak IC, *i*-propanol/hexane = 5/95, flow rate 1.0 mL/min,  $\lambda$  = 254 nm);  $t_r$  = 23.93, 28.07, 32.10 and 34.49 min.

$^1\text{H NMR}$  (400 MHz, Chloroform-*d*)  $\delta$  7.66 – 7.58 (m, 2H), 7.44 – 7.39 (m, 3H), 7.39 – 7.26 (m, 7H), 7.24 – 7.21 (m, 1H), 7.14 – 7.06 (m, 2H), 5.25 (dd,  $J$  = 7.6, 7.6 Hz, 1H), 4.61 (dd,  $J$  = 8.0, 4.8 Hz, 1H), 4.06 (dd,  $J$  = 8.0, 5.2 Hz, 1H), 2.64 (dd,  $J$  = 13.2, 5.2 Hz, 1H), 2.53 (dd,  $J$  = 13.2, 8.0 Hz, 1H), 2.47 – 2.33 (m, 2H), 1.45 (s, 9H), 1.40 (s, 3H).

$^{13}\text{C NMR}$  (101 MHz, Chloroform-*d*)  $\delta$  171.3, 169.7, 144.1, 139.7, 136.4, 135.5, 130.2, 128.7, 128.5, 128.3, 128.3, 128.0, 127.9, 127.3, 125.7, 123.2, 81.1, 73.6, 64.9, 44.0, 38.4, 28.1, 16.5.

**HRMS** (ESI+) calcd. For  $\text{C}_{31}\text{H}_{36}\text{NO}_3$  ( $[\text{M}+\text{H}]^+$ ): 470.2690, found: 470.2691.

### HPLC chromatogram of compound (2*R*,7*S*,*E*)-3t

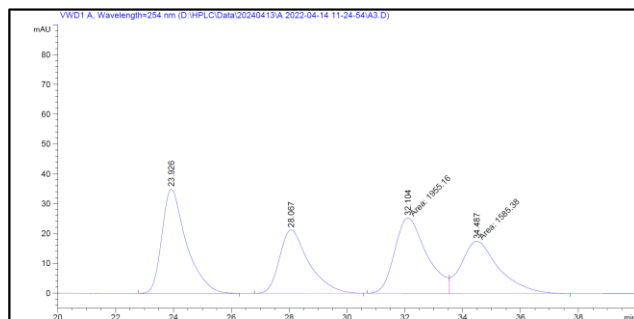

| Peak # | RetTime [min] | Type | Width [min] | Area [mAU*s] | Height [mAU] | Area %  |
|--------|---------------|------|-------------|--------------|--------------|---------|
| 1      | 23.926        | BB   | 0.8571      | 2047.70337   | 34.97396     | 28.9281 |
| 2      | 28.067        | BB   | 1.0231      | 1490.34656   | 21.28062     | 21.0543 |
| 3      | 32.104        | MF   | 1.2867      | 1955.16443   | 25.32477     | 27.6208 |
| 4      | 34.487        | FM   | 1.5080      | 1585.38269   | 17.52140     | 22.3968 |

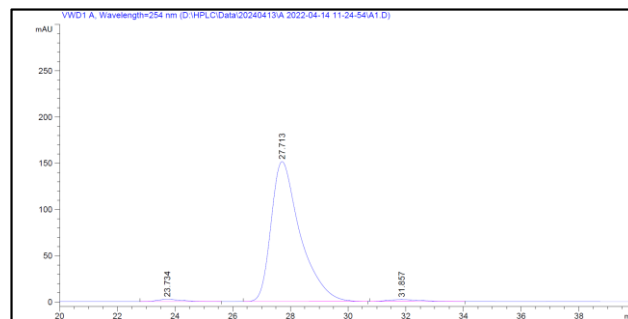

| Peak # | RetTime [min] | Type | Width [min] | Area [mAU*s] | Height [mAU] | Area %  |
|--------|---------------|------|-------------|--------------|--------------|---------|
| 1      | 23.734        | BB   | 0.7510      | 130.68596    | 2.28919      | 1.2109  |
| 2      | 27.713        | BB   | 1.0329      | 1.05208e4    | 151.18086    | 97.4860 |
| 3      | 31.857        | BB   | 0.8839      | 140.63211    | 1.88178      | 1.3031  |

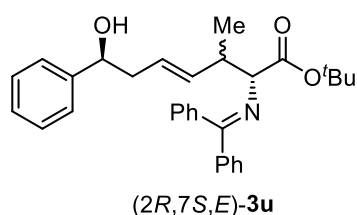

**tert-butyl (2*R*,7*S*,*E*)-2-((diphenylmethylene)amino)-7-hydroxy-3-methyl-7-phenylhept-4-enoate ((2*R*,7*S*,*E*)-3u):** yield (62 mg, 66%); colorless oil;  $[\alpha]_D^{25} = +34.6$  ( $c$  0.46,  $\text{CH}_2\text{Cl}_2$ ); The product was analyzed by  $^1\text{H NMR}$  to determine the dr value: 2.5:1 dr.

$^1\text{H NMR}$  (400 MHz, Chloroform-*d*)  $\delta$  7.69 – 7.60 (m, 2H), 7.45 – 7.39 (m, 3H), 7.39 – 7.27 (m, 7H), 7.25 – 7.23 (m, 1H), 7.16 – 7.07 (m, 2H), 5.84 – 5.72 (m, 0.67H, minor), 5.60 – 5.39 (m, 1.30H, major), 4.68 (dd,  $J$  = 8.4, 4.0 Hz, 0.66H, major), 4.61 (dd,  $J$  = 8.8, 4.0 Hz, 0.31H, minor), 3.83 (d,  $J$  = 5.2 Hz, 0.64H, major), 3.79 (d,  $J$  = 6.8 Hz, 0.29H, minor), 2.95 – 2.77 (m, 1H), 2.63 – 2.45 (m, 1H), 2.45 – 2.17 (m, 2H), 1.44 (s, 2.31H, minor), 1.43 (s, 6.68H, major), 1.05 (d,  $J$  = 6.8 Hz, 0.82H, minor),

0.98 (d,  $J = 6.8$  Hz, 2.13H, major).

$^{13}\text{C}$  NMR (101 MHz, Chloroform- $d$ )  $\delta$  170.8, 170.7, 170.4, 170.1, 144.1, 144.0, 139.6, 137.1, 136.8, 136.6, 130.2, 128.8, 128.51, 128.46, 128.42, 128.40, 128.3, 128.0, 127.8, 127.2, 126.3, 126.2, 125.8, 125.7, 81.1, 81.0, 73.0, 72.9, 71.0, 70.8, 43.2, 42.9, 41.2, 40.8, 28.1, 17.4, 16.7.

HRMS (ESI+) calcd. For  $\text{C}_{31}\text{H}_{36}\text{NO}_3$  ( $[\text{M}+\text{H}]^+$ ): 470.2690, found: 470.2696.

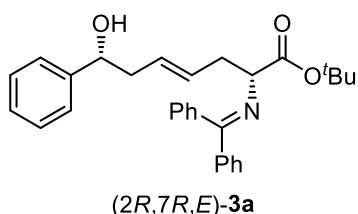

**tert-butyl (2*R*,7*R*,*E*)-2-((diphenylmethylene)amino)-7-hydroxy-7-phenylhept-4-enoate ((2*R*,7*R*,*E*)-3a):** yield (87 mg, 96%); colorless oil;  $[\alpha]_D^{20} = +78.7$  ( $c$  0.57,  $\text{CH}_2\text{Cl}_2$ ); The product was analyzed by HPLC to determine the dr value and enantiomeric excess: > 20:1 dr, > 99% ee (Chiralpak IC, *i*-propanol/hexane = 5/95, flow rate 1.0 mL/min,  $\lambda = 254$  nm);  $t_r = 26.30, 29.76, 31.69$  and 47.59 min.

$^1\text{H}$  NMR (400 MHz, Chloroform- $d$ )  $\delta$  7.64 (d,  $J = 7.6$  Hz, 2H), 7.46 – 7.29 (m, 10H), 7.25 – 7.22 (m, 1H), 7.19 – 7.13 (m, 2H), 5.59 – 5.43 (m, 2H), 4.63 (dd,  $J = 8.2, 4.6$  Hz, 1H), 4.00 (t,  $J = 6.4$  Hz, 1H), 2.66 – 2.55 (m, 2H), 2.48 – 2.35 (m, 2H), 1.43 (s, 9H).

$^{13}\text{C}$  NMR (101 MHz, Chloroform- $d$ )  $\delta$  171.0, 170.1, 143.9, 139.6, 136.6, 130.7, 130.2, 128.8, 128.5, 128.4, 128.3, 128.0, 127.8, 127.3, 125.7, 81.1, 73.1, 66.0, 42.9, 37.0, 28.0.

HRMS (ESI+) calcd. For  $\text{C}_{30}\text{H}_{34}\text{NO}_3$  ( $[\text{M}+\text{H}]^+$ ): 456.2533, found: 456.2540.

### HPLC chromatogram of compound (2*R*,7*R*,*E*)-3a

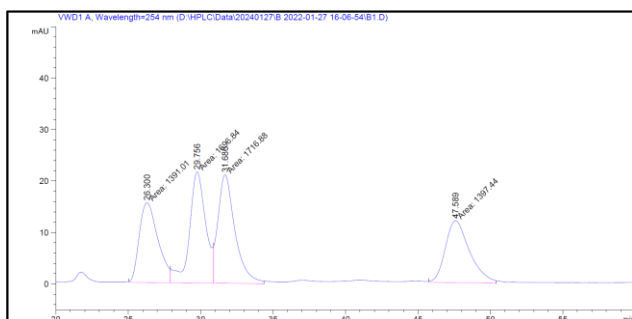

| Peak # | RetTime [min] | Type | Width [min] | Area [mAU*s] | Height [mAU] | Area %  |
|--------|---------------|------|-------------|--------------|--------------|---------|
| 1      | 26.300        | MF   | 1.4934      | 1391.01367   | 15.52366     | 22.4279 |
| 2      | 29.756        | MF   | 1.3096      | 1696.83582   | 21.59413     | 27.3588 |
| 3      | 31.686        | FM   | 1.3572      | 1716.87903   | 21.08306     | 27.6819 |
| 4      | 47.589        | MM   | 1.9347      | 1397.43835   | 12.03840     | 22.5315 |

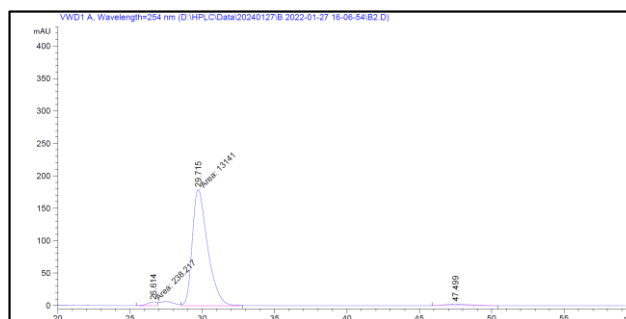

| Peak # | RetTime [min] | Type | Width [min] | Area [mAU*s] | Height [mAU] | Area %  |
|--------|---------------|------|-------------|--------------|--------------|---------|
| 1      | 26.614        | MF   | 0.7280      | 238.21719    | 5.45374      | 1.7430  |
| 2      | 29.715        | FM   | 1.2220      | 1.31410e4    | 179.22752    | 96.1510 |
| 3      | 47.499        | BB   | 1.3212      | 287.82278    | 2.59463      | 2.1060  |

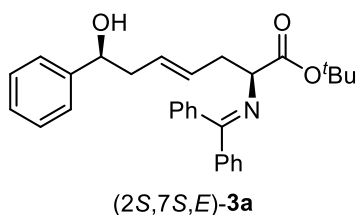

**tert-butyl (2S,7S,E)-2-((diphenylmethylene)amino)-7-hydroxy-7-phenylhept-4-enoate ((2S,7S,E)-3a):** yield (86 mg, 96%); colorless oil;  $[\alpha]_D^{20} = -77.6$  (*c* 0.57, CH<sub>2</sub>Cl<sub>2</sub>); The product was analyzed by HPLC to determine the dr value and enantiomeric excess: > 20:1 dr, > 99% ee (Chiralpak IC, *i*-propanol/hexane = 5/95, flow rate 1.0 mL/min,  $\lambda = 254$  nm);  $t_r = 26.30, 29.76, 31.69$  and 47.59 min.

**HRMS (ESI+)** calcd. For C<sub>30</sub>H<sub>34</sub>NO<sub>3</sub> ([M+H]<sup>+</sup>): 456.2533, found: 456.2537.

#### HPLC chromatogram of compound (2S,7S,E)-3a



| Peak # | RetTime [min] | Type | Width [min] | Area [mAU*s] | Height [mAU] | Area %  |
|--------|---------------|------|-------------|--------------|--------------|---------|
| 1      | 26.300        | MF   | 1.4934      | 1391.01367   | 15.52366     | 22.4279 |
| 2      | 29.756        | MF   | 1.3096      | 1696.83582   | 21.59413     | 27.3588 |
| 3      | 31.686        | FM   | 1.3572      | 1716.87903   | 21.08306     | 27.6819 |
| 4      | 47.589        | MM   | 1.9347      | 1397.43835   | 12.03840     | 22.5315 |

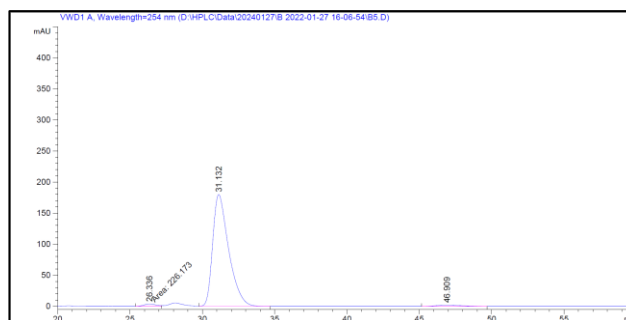

| Peak # | RetTime [min] | Type | Width [min] | Area [mAU*s] | Height [mAU] | Area %  |
|--------|---------------|------|-------------|--------------|--------------|---------|
| 1      | 26.336        | MF   | 0.9886      | 226.17250    | 3.81289      | 1.5918  |
| 2      | 31.132        | BB   | 1.1521      | 1.37537e4    | 179.87622    | 96.7981 |
| 3      | 46.909        | BB   | 1.3099      | 228.77431    | 2.04857      | 1.6101  |

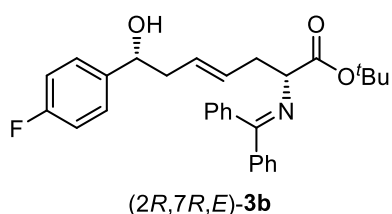

**tert-butyl (2R,7R,E)-2-((diphenylmethylene)amino)-7-(4-fluorophenyl)-7-hydroxyhept-4-enoate ((2R,7R,E)-3b):** yield (77 mg, 81%); colorless oil;  $[\alpha]_D^{15} = +87.1$  (*c* 0.52, CH<sub>2</sub>Cl<sub>2</sub>); The product was analyzed by HPLC to determine the dr value and the enantiomeric excess: 12:1 dr, > 99% ee (Chiralpak IC, *i*-propanol/hexane = 5/95, flow rate 1.0 mL/min,  $\lambda = 254$  nm);  $t_r = 18.31, 20.12,$

22.05 and 30.93 min.

$^1\text{H NMR}$  (400 MHz, Chloroform-*d*)  $\delta$  7.69 – 7.60 (m, 2H), 7.45 – 7.30 (m, 6H), 7.28 – 7.25 (m, 2H), 7.17 – 7.13 (m, 2H), 7.00 – 6.94 (m, 2H), 5.60 – 5.40 (m, 2H), 4.61 (dd,  $J = 7.8, 4.6$  Hz, 1H), 4.00 (t,  $J = 6.2$  Hz, 1H), 2.65 – 2.53 (m, 2H), 2.46 – 2.31 (m, 2H), 1.43 (s, 9H).

$^{13}\text{C NMR}$  (101 MHz, Chloroform-*d*)  $\delta$  171.0, 170.2, 162.0 (d,  $J = 245.7$  Hz), 139.6 (d,  $J = 2.9$  Hz), 139.6, 136.6, 130.9, 130.3, 128.8, 128.5, 128.4, 128.2, 128.0, 127.8, 127.4 (d,  $J = 8.0$  Hz), 115.1 (d,  $J = 21.2$  Hz), 81.1, 77.2, 72.5, 65.9, 42.9, 37.0, 28.1.

$^{19}\text{F NMR}$  (376 MHz, Chloroform-*d*)  $\delta$  -115.42 – -115.64 (m).

**HRMS** (ESI+) calcd. For  $\text{C}_{30}\text{H}_{33}\text{FNO}_3$  ( $[\text{M}+\text{H}]^+$ ): 474.2439, found: 474.2432.

### HPLC chromatogram of compound (2*R*,7*R*,*E*)-3*b*

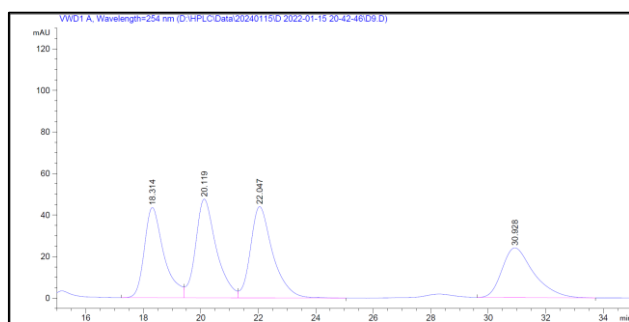

| Peak # | RetTime [min] | Type | Width [min] | Area [mAU*s] | Height [mAU] | Area %  |
|--------|---------------|------|-------------|--------------|--------------|---------|
| 1      | 18.314        | BV   | 0.7014      | 2052.49683   | 43.42568     | 23.7587 |
| 2      | 20.119        | VV   | 0.7415      | 2388.60449   | 47.51143     | 27.6493 |
| 3      | 22.047        | VB   | 0.7982      | 2367.23413   | 43.96163     | 27.4019 |
| 4      | 30.928        | BB   | 1.1339      | 1830.59253   | 23.94411     | 21.1900 |

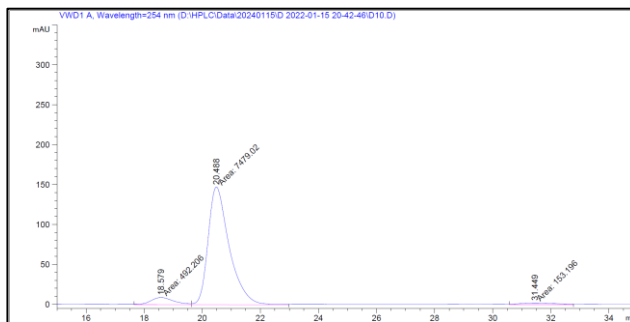

| Peak # | RetTime [min] | Type | Width [min] | Area [mAU*s] | Height [mAU] | Area %  |
|--------|---------------|------|-------------|--------------|--------------|---------|
| 1      | 18.579        | MF   | 0.9187      | 492.20605    | 8.92935      | 6.0583  |
| 2      | 20.488        | FM   | 0.8453      | 7479.02393   | 147.46727    | 92.0560 |
| 3      | 31.449        | MM   | 1.3189      | 153.19603    | 1.93593      | 1.8856  |

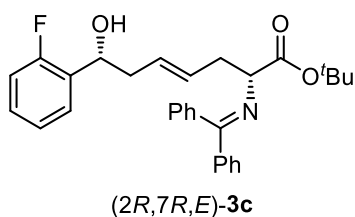

**tert-butyl (2*R*,7*R*,*E*)-2-((diphenylmethylene)amino)-7-(2-fluorophenyl)-7-hydroxyhept-4-enoate ((2*R*,7*R*,*E*)-3*c*):** yield (76 mg, 80%); colorless oil;  $[\alpha]_D^{15} = +86.9$  ( $c$  0.53,  $\text{CH}_2\text{Cl}_2$ ); The product was analyzed by HPLC to determine the dr value and the enantiomeric excess: 11:1 dr, 99% ee (Chiralpak IF + Chiralpak IF, *i*-propanol/hexane = 5/95, flow rate 1.0 mL/min,  $\lambda = 254$  nm);  $t_r = 18.77, 19.68, 20.47$  and 22.37 min.

<sup>1</sup>H NMR (400 MHz, Chloroform-*d*) δ 7.66 – 7.62 (m, 2H), 7.45 – 7.36 (m, 5H), 7.35 – 7.30 (m, 2H), 7.23 – 7.19 (m, 1H), 7.18 – 7.15 (m, 2H), 7.10 – 7.05 (m, 1H), 7.01 – 6.95 (m, 1H), 5.60 – 5.45 (m, 2H), 4.96 (dd, *J* = 8.4, 4.0 Hz, 1H), 4.00 (dd, *J* = 7.0, 5.4 Hz, 1H), 2.62 – 2.47 (m, 3H), 2.39 – 2.32 (m, 1H), 1.44 (s, 9H).

<sup>13</sup>C NMR (101 MHz, Chloroform-*d*) 171.0, 170.1, 159.6 (d, *J* = 246.4 Hz), 139.6, 136.6, 131.0, 130.2, 128.8, 128.6, 128.5, 128.4, 128.2, 128.0, 127.8, 127.2 (d, *J* = 4.4 Hz), 124.1 (d, *J* = 3.5 Hz), 115.1 (d, *J* = 21.9 Hz), 81.1, 67.0 (d, *J* = 2.5 Hz), 66.0, 41.5, 37.0, 28.1.

<sup>19</sup>F NMR (376 MHz, Chloroform-*d*) δ -119.69 – -119.81 (m).

HRMS (ESI+) calcd. For C<sub>30</sub>H<sub>33</sub>FNO<sub>3</sub> ([M+H]<sup>+</sup>): 474.2439, found: 474.2437.

### HPLC chromatogram of compound (2*R*,7*R*,*E*)-3c

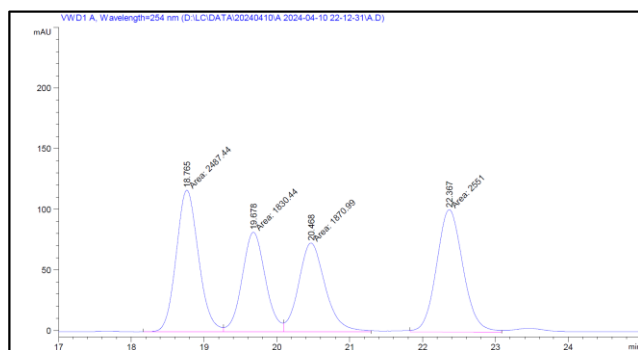

| Peak # | RetTime [min] | Type | Width [min] | Area [mAU*s] | Height [mAU] | Area %  |
|--------|---------------|------|-------------|--------------|--------------|---------|
| 1      | 18.765        | MF   | 0.3547      | 2487.43530   | 116.87381    | 28.4608 |
| 2      | 19.678        | MF   | 0.3709      | 1830.43713   | 82.25761     | 20.9436 |
| 3      | 20.468        | MF   | 0.4250      | 1870.98657   | 73.37386     | 21.4075 |
| 4      | 22.367        | FM   | 0.4213      | 2550.99854   | 100.91523    | 29.1881 |

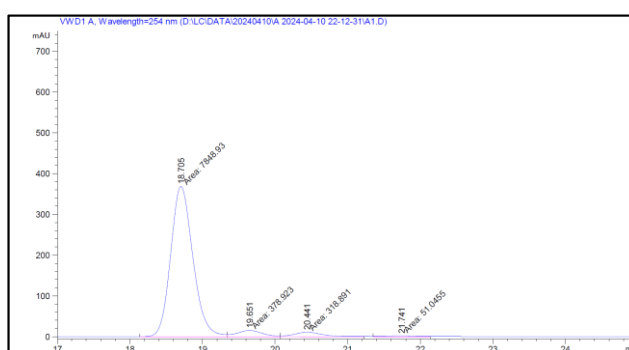

| Peak # | RetTime [min] | Type | Width [min] | Area [mAU*s] | Height [mAU] | Area %  |
|--------|---------------|------|-------------|--------------|--------------|---------|
| 1      | 18.705        | MF   | 0.3545      | 7848.92578   | 368.96945    | 91.2901 |
| 2      | 19.651        | MF   | 0.4049      | 378.92328    | 15.59919     | 4.4072  |
| 3      | 20.441        | FM   | 0.4698      | 318.89145    | 11.31284     | 3.7090  |
| 4      | 21.741        | FM   | 0.4322      | 51.04554     | 1.96861      | 0.5937  |

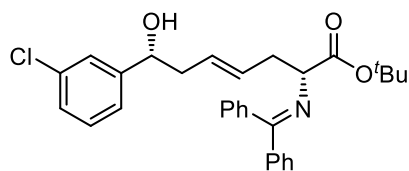

(2*R*,7*R*,*E*)-3d

*tert*-butyl (2*R*,7*R*,*E*)-7-(3-chlorophenyl)-2-((diphenylmethylene)amino)-7-hydroxyhept-4-enoate((2*R*,7*R*,*E*)-3d): yield (95 mg, 97%); colorless oil; [ $\alpha$ ]<sub>D</sub><sup>15</sup> = +73.0 (*c* 0.57, CH<sub>2</sub>Cl<sub>2</sub>); The product was analyzed by HPLC to determine the dr value and the enantiomeric excess: 17:1 dr, > 99% ee (Chiralpak IC, *i*-propanol/hexane = 5/95, flow rate 1.0 mL/min,  $\lambda$  = 254 nm); *t*<sub>r</sub> = 18.04, 22.19,

24.45 and 52.05 min.

$^1\text{H NMR}$  (400 MHz, Chloroform-*d*)  $\delta$  7.67 – 7.61 (m, 2H), 7.46 – 7.30 (m, 7H), 7.23 – 7.13 (m, 5H), 5.62 – 5.40 (m, 2H), 4.60 (dd,  $J = 8.2, 4.2$  Hz, 1H), 4.01 (t,  $J = 6.0$  Hz, 1H), 2.65 – 2.55 (m, 2H), 2.48 – 2.41 (m, 1H), 2.34 – 2.30 (m, 1H), 1.43 (s, 9H).

$^{13}\text{C NMR}$  (101 MHz, Chloroform-*d*)  $\delta$  171.0, 170.2, 146.1, 139.5, 136.6, 134.2, 131.3, 130.3, 129.5, 128.8, 128.6, 128.4, 128.0, 127.8, 127.4, 125.9, 123.9, 81.1, 72.3, 65.9, 42.8, 37.0, 28.1.

**HRMS** (ESI+) calcd. For  $\text{C}_{30}\text{H}_{33}\text{ClNO}_3$  ( $[\text{M}+\text{H}]^+$ ): 490.2143, found: 490.2147.

### HPLC chromatogram of compound (2*R*,7*R*,*E*)-3*d*

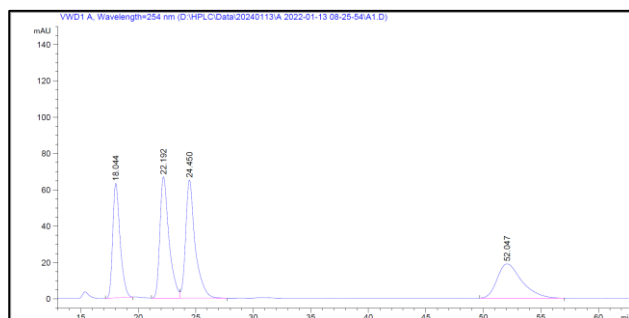

| Peak # | RetTime [min] | Type | Width [min] | Area [mAU*s] | Height [mAU] | Area %  |
|--------|---------------|------|-------------|--------------|--------------|---------|
| 1      | 18.044        | BB   | 0.6686      | 2799.91260   | 62.98667     | 21.5644 |
| 2      | 22.192        | BV   | 0.8148      | 3652.05640   | 66.69958     | 28.1275 |
| 3      | 24.450        | VB   | 0.8407      | 3734.44385   | 64.96114     | 28.7620 |
| 4      | 52.047        | BB   | 1.8575      | 2797.53638   | 18.81717     | 21.5461 |

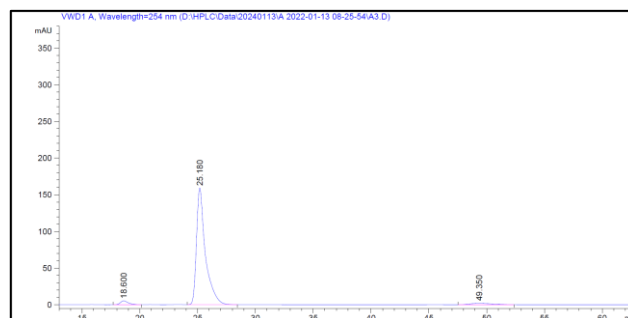

| Peak # | RetTime [min] | Type | Width [min] | Area [mAU*s] | Height [mAU] | Area %  |
|--------|---------------|------|-------------|--------------|--------------|---------|
| 1      | 18.600        | BB   | 0.6752      | 242.17767    | 5.25941      | 2.7063  |
| 2      | 25.180        | BB   | 0.7705      | 8464.11133   | 158.89493    | 94.5857 |
| 3      | 49.350        | BB   | 1.3725      | 242.32547    | 2.08561      | 2.7080  |

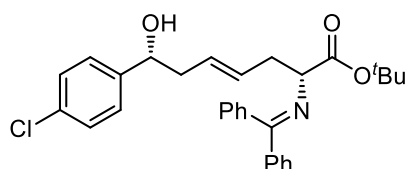

(2*R*,7*R*,*E*)-3*e*

**tert-butyl (2*R*,7*R*,*E*)-7-(4-chlorophenyl)-2-((diphenylmethylene)amino)-7-hydroxyhept-4-enoate ((2*R*,7*R*,*E*)-3*e*):** yield (91 mg, 93%); colorless oil;  $[\alpha]_D^{15} = +82.8$  ( $c$  0.53,  $\text{CH}_2\text{Cl}_2$ ); The product was analyzed by HPLC to determine the dr value and the enantiomeric excess: 12:1 dr, > 99% ee (Chiralpak IE, *i*-propanol/hexane = 5/95, flow rate 1.0 mL/min,  $\lambda = 254$  nm);  $t_r = 23.48, 24.58, 25.91$  and 28.76 min.

$^1\text{H NMR}$  (400 MHz, Chloroform-*d*)  $\delta$  7.67 – 7.61 (m, 2H), 7.46 – 7.41 (m, 3H), 7.41 – 7.36 (m, 1H), 7.41 – 7.36 (m, 2H), 7.26 – 7.21 (m, 4H), 7.18 – 7.12 (m, 2H), 5.60 – 5.39 (m, 2H), 4.61 (dd,  $J = 8.0,$



4.4 Hz, 1H), 4.00 (t,  $J = 6.2$  Hz, 1H), 2.63 – 2.54 (m, 2H), 2.46 – 2.39 (m, 1H), 2.36 – 2.31 (m, 1H), 1.43 (s, 9H).

$^{13}\text{C}$  NMR (101 MHz, Chloroform- $d$ )  $\delta$  171.0, 170.2, 142.4, 139.5, 136.6, 132.8, 131.1, 130.3, 128.8, 128.6, 128.43, 128.38, 128.0, 127.8, 127.1, 81.1, 72.3, 65.9, 42.8, 37.0, 28.0.

HRMS (ESI+) calcd. For  $\text{C}_{30}\text{H}_{33}\text{ClNO}_3$  ( $[\text{M}+\text{H}]^+$ ): 490.2143, found: 490.2140.

### HPLC chromatogram of compound (2*R*,7*R*,*E*)-3e

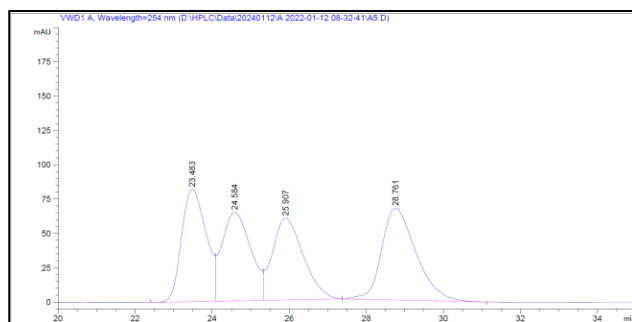

| Peak # | RetTime [min] | Type | Width [min] | Area [mAU*s] | Height [mAU] | Area %  |
|--------|---------------|------|-------------|--------------|--------------|---------|
| 1      | 23.483        | BV   | 0.6857      | 3619.99219   | 81.73204     | 25.0628 |
| 2      | 24.584        | VV   | 0.7862      | 3358.27295   | 64.52159     | 23.2508 |
| 3      | 25.907        | VB   | 0.8367      | 3323.45581   | 59.58376     | 23.0097 |
| 4      | 28.761        | BB   | 0.9501      | 4141.96729   | 66.82352     | 28.6767 |

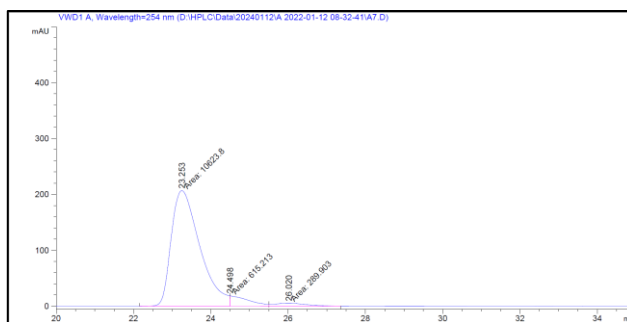

| Peak # | RetTime [min] | Type | Width [min] | Area [mAU*s] | Height [mAU] | Area %  |
|--------|---------------|------|-------------|--------------|--------------|---------|
| 1      | 23.253        | MF   | 0.8573      | 1.06238e4    | 206.54178    | 92.1492 |
| 2      | 24.498        | MF   | 0.4165      | 615.21277    | 18.35585     | 5.3363  |
| 3      | 26.020        | FM   | 0.9477      | 289.90277    | 5.09849      | 2.5146  |

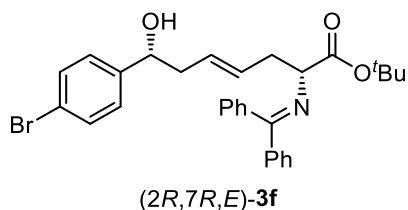

**tert-butyl (2*R*,7*R*,*E*)-7-(4-bromophenyl)-2-((diphenylmethylene)amino)-7-hydroxyhept-4-enoate ((2*R*,7*R*,*E*)-3f):** yield (100 mg, 94%); colorless oil;  $[\alpha]_D^{15} = +85.0$  ( $c$  0.44,  $\text{CH}_2\text{Cl}_2$ ); The product was analyzed by HPLC to determine the dr value and the enantiomeric excess: 12:1 dr, > 99% ee (Chiralpak IE, *i*-propanol/hexane = 5/95, flow rate 1.0 mL/min,  $\lambda = 254$  nm);  $t_r = 24.47$ , 25.66, 26.95 and 30.03 min.

$^1\text{H}$  NMR (400 MHz, Chloroform- $d$ )  $\delta$  7.67 – 7.61 (m, 2H), 7.46 – 7.31 (m, 8H), 7.20 – 7.11 (m, 4H), 5.60 – 5.38 (m, 2H), 4.59 (dd,  $J = 7.8, 4.6$  Hz, 1H), 4.00 (t,  $J = 6.2$  Hz, 1H), 2.64 – 2.52 (m, 2H), 2.46 – 2.39 (m, 1H), 2.37 – 2.31 (m, 1H), 1.43 (s, 9H).

$^{13}\text{C}$  NMR (101 MHz, Chloroform- $d$ )  $\delta$  171.0, 170.2, 142.9, 139.5, 136.6, 131.3, 131.1, 130.3, 128.8,

128.6, 128.4, 128.02, 127.99, 127.8, 127.5, 121.0, 81.1, 72.4, 65.9, 42.8, 37.0, 28.0.

**HRMS** (ESI+) calcd. For  $C_{30}H_{33}BrNO_3$  ( $[M+H]^+$ ): 534.1638, found: 534.1633.

### HPLC chromatogram of compound (2*R*,7*R*,*E*)-3*f*

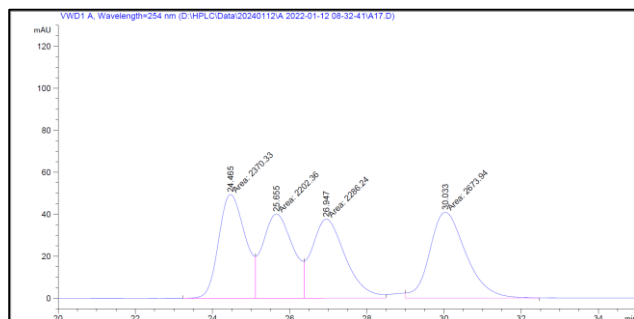

| Peak # | RetTime [min] | Type | Width [min] | Area [mAU*s] | Height [mAU] | Area %  |
|--------|---------------|------|-------------|--------------|--------------|---------|
| 1      | 24.465        | MF   | 0.7993      | 2370.32544   | 49.42738     | 24.8648 |
| 2      | 25.655        | FM   | 0.9153      | 2202.36450   | 40.10333     | 23.1028 |
| 3      | 26.947        | FM   | 1.0117      | 2286.24121   | 37.66394     | 23.9827 |
| 4      | 30.033        | FM   | 1.0899      | 2673.94165   | 40.88910     | 28.0497 |

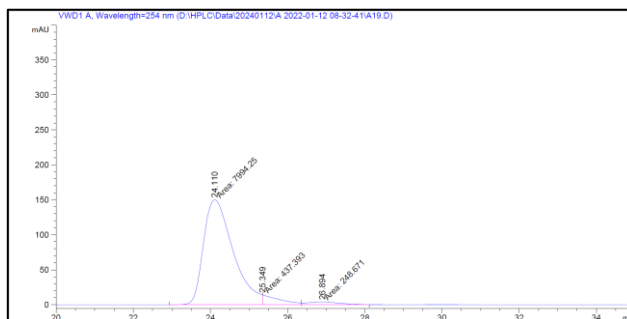

| Peak # | RetTime [min] | Type | Width [min] | Area [mAU*s] | Height [mAU] | Area %  |
|--------|---------------|------|-------------|--------------|--------------|---------|
| 1      | 24.110        | MF   | 0.8874      | 7994.24707   | 150.14470    | 92.0963 |
| 2      | 25.349        | MF   | 0.3982      | 437.39340    | 14.20834     | 5.0389  |
| 3      | 26.894        | FM   | 1.0130      | 248.67134    | 4.09144      | 2.8648  |

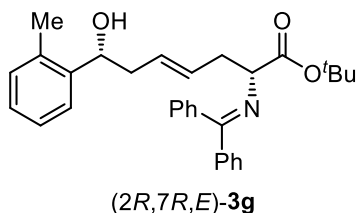

**tert-butyl** (2*R*,7*R*,*E*)-2-((diphenylmethylene)amino)-7-hydroxy-7-(*o*-tolyl)hept-4-enoate

((2*R*,7*R*,*E*)-3*g*): yield (70 mg, 75%); colorless oil;  $[\alpha]_D^{15} = +85.5$  ( $c$  0.48,  $CH_2Cl_2$ ); The product was analyzed by HPLC to determine the dr value and the enantiomeric excess: 17:1 dr, 98% ee (Chiralpak IC, *i*-propanol/hexane = 5/95, flow rate 1.0 mL/min,  $\lambda = 254$  nm);  $t_r = 25.14, 27.38, 31.10$  and 41.29 min.

**$^1H$  NMR** (400 MHz, Chloroform-*d*)  $\delta$  7.67 – 7.62 (m, 2H), 7.45 – 7.40 (m, 4H), 7.39 – 7.30 (m, 3H), 7.21 – 7.13 (m, 4H), 7.12 – 7.09 (m, 1H), 5.60 – 5.48 (m, 2H), 4.85 (dd,  $J = 8.4, 4.0$  Hz, 1H), 4.01 (dd,  $J = 7.4, 5.4$  Hz, 1H), 2.67 – 2.56 (m, 2H), 2.45 – 2.39 (m, 1H), 2.35 – 2.30 (m, 1H), 2.28 (s, 3H), 1.44 (s, 9H).

**$^{13}C$  NMR** (101 MHz, Chloroform-*d*)  $\delta$  171.0, 170.1, 142.0, 139.6, 136.6, 134.2, 130.5, 130.2, 128.9, 128.8, 128.5, 128.4, 128.0, 127.8, 127.0, 126.2, 125.1, 81.1, 69.6, 66.0, 41.5, 37.1, 28.1, 19.0.

**HRMS** (ESI+) calcd. For  $C_{31}H_{36}NO_3$  ( $[M+H]^+$ ): 470.2690, found: 470.2694.

## HPLC chromatogram of compound (2*R*,7*R*,*E*)-3g

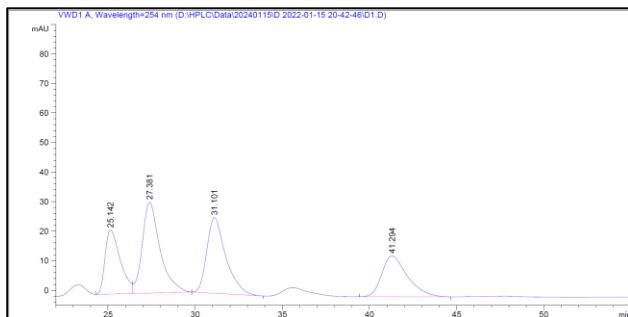

| Peak # | RetTime [min] | Type | Width [min] | Area [mAU*s] | Height [mAU] | Area %  |
|--------|---------------|------|-------------|--------------|--------------|---------|
| 1      | 25.142        | BV   | 0.9046      | 1314.24036   | 21.63872     | 19.1849 |
| 2      | 27.381        | VB   | 1.0323      | 2185.32861   | 30.78133     | 31.9008 |
| 3      | 31.101        | BB   | 1.1250      | 1943.81995   | 25.59508     | 28.3753 |
| 4      | 41.294        | BB   | 1.4303      | 1406.99451   | 13.83712     | 20.5389 |

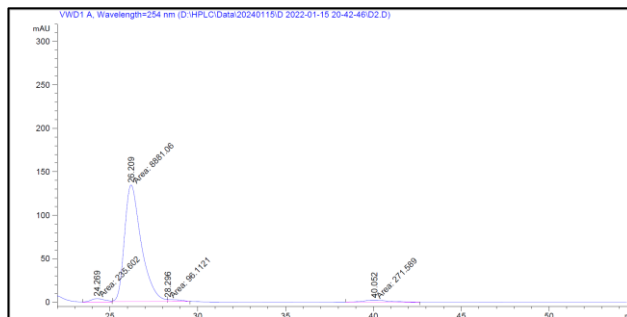

| Peak # | RetTime [min] | Type | Width [min] | Area [mAU*s] | Height [mAU] | Area %  |
|--------|---------------|------|-------------|--------------|--------------|---------|
| 1      | 24.269        | MM   | 0.9643      | 235.60226    | 4.07226      | 2.4841  |
| 2      | 26.209        | MF   | 1.1042      | 8881.05566   | 134.05222    | 93.6390 |
| 3      | 28.296        | FM   | 0.7892      | 96.11207     | 2.02963      | 1.0134  |
| 4      | 40.052        | MM   | 1.9306      | 271.58871    | 2.34461      | 2.8635  |

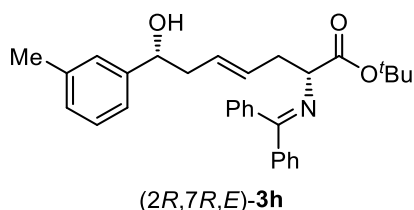

**tert-butyl (2*R*,7*R*,*E*)-2-((diphenylmethylene)amino)-7-hydroxy-7-(*m*-tolyl)hept-4-enoate ((2*R*,7*R*,*E*)-3h):** yield (75 mg, 80%); colorless oil;  $[\alpha]_D^{15} = +86.7$  (*c* 0.50, CH<sub>2</sub>Cl<sub>2</sub>); The product was analyzed by HPLC to determine the dr value and the enantiomeric excess: 19:1 dr, > 99% ee (Chiralpak IC + Chiralpak IE, *i*-propanol/hexane = 10/90, flow rate 0.75 mL/min,  $\lambda = 254$  nm);  $t_r = 35.60, 37.08, 42.17$  and 48.43 min.

**<sup>1</sup>H NMR** (400 MHz, Chloroform-*d*)  $\delta$  7.67 – 7.61 (m, 2H), 7.46 – 7.40 (m, 3H), 7.39 – 7.30 (m, 3H), 7.21 – 7.13 (m, 4H), 7.10 – 7.04 (m, 2H), 5.58 – 5.43 (m, 2H), 4.59 (dd, *J* = 8.2, 4.6 Hz, 1H), 4.00 (dd, *J* = 7.2, 5.6 Hz, 1H), 2.65 – 2.55 (m, 2H), 2.49 – 2.36 (m, 2H), 2.33 (s, 3H), 1.43 (s, 9H).

**<sup>13</sup>C NMR** (101 MHz, Chloroform-*d*)  $\delta$  171.0, 170.1, 143.9, 139.6, 137.9, 136.6, 130.5, 130.2, 128.8, 128.7, 128.5, 128.4, 128.2, 128.1, 128.0, 127.8, 126.4, 122.8, 81.0, 73.2, 66.0, 42.8, 37.0, 28.1, 21.4.

**HRMS** (ESI+) calcd. For C<sub>31</sub>H<sub>36</sub>NO<sub>3</sub> ([M+H]<sup>+</sup>): 470.2690, found: 470.2696.

## HPLC chromatogram of compound (2*R*,7*R*,*E*)-3h

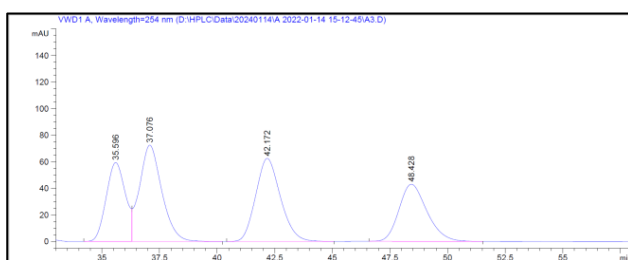

| Peak # | RetTime [min] | Type | Width [min] | Area [mAU*s] | Height [mAU] | Area %  |
|--------|---------------|------|-------------|--------------|--------------|---------|
| 1      | 35.596        | BV   | 0.8829      | 3422.52173   | 59.34138     | 20.6241 |
| 2      | 37.076        | VB   | 0.9937      | 4889.97803   | 72.42786     | 29.4670 |
| 3      | 42.172        | BB   | 1.1217      | 4668.31738   | 62.47826     | 28.1313 |
| 4      | 48.428        | BB   | 1.2574      | 3613.95337   | 42.91986     | 21.7777 |

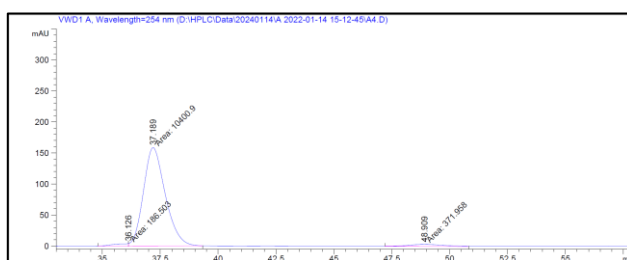

| Peak # | RetTime [min] | Type | Width [min] | Area [mAU*s] | Height [mAU] | Area %  |
|--------|---------------|------|-------------|--------------|--------------|---------|
| 1      | 36.126        | FM   | 0.7375      | 186.50298    | 4.21450      | 1.7018  |
| 2      | 37.189        | FM   | 1.0929      | 1.04009e4    | 158.61198    | 94.9043 |
| 3      | 48.909        | MF   | 1.7696      | 371.95813    | 3.50319      | 3.3940  |

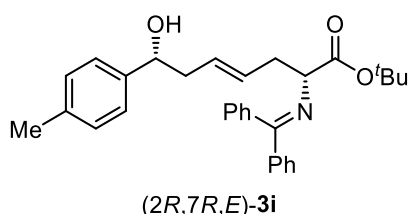

**tert-butyl (2*R*,7*R*,*E*)-2-((diphenylmethylene)amino)-7-hydroxy-7-(*p*-tolyl)hept-4-enoate ((2*R*,7*R*,*E*)-3i):** yield (83 mg, 88%); colorless oil;  $[\alpha]_D^{15} = +77.6$  (*c* 0.52, CH<sub>2</sub>Cl<sub>2</sub>); The product was analyzed by HPLC to determine the dr value and the enantiomeric excess: 12:1 dr, > 99% ee (Chiralpak IE, *i*-propanol/hexane = 5/95, flow rate 1.0 mL/min,  $\lambda = 254$  nm);  $t_r = 35.66, 38.51, 40.38$  and 48.37 min.

**<sup>1</sup>H NMR** (400 MHz, Chloroform-*d*)  $\delta$  7.67 – 7.61 (m, 2H), 7.45 – 7.40 (m, 3H), 7.39 – 7.30 (m, 3H), 7.20 – 7.13 (m, 4H), 7.12 – 7.09 (m, 2H), 5.57 – 5.42 (m, 2H), 4.59 (dd, *J* = 7.8, 5.0 Hz, 1H), 3.99 (dd, *J* = 7.2, 5.2 Hz, 1H), 2.65 – 2.55 (m, 2H), 2.45 – 2.35 (m, 2H), 2.32 (s, 3H), 1.43 (s, 9H).

**<sup>13</sup>C NMR** (101 MHz, Chloroform-*d*)  $\delta$  171.0, 170.1, 141.0, 139.6, 136.9, 136.7, 130.4, 130.2, 129.0, 128.8, 128.7, 128.5, 128.4, 128.0, 127.8, 125.7, 81.0, 73.1, 66.0, 42.8, 37.0, 28.0, 21.0.

**HRMS** (ESI+) calcd. For C<sub>31</sub>H<sub>36</sub>NO<sub>3</sub> ([M+H]<sup>+</sup>): 470.2690, found: 470.2688.

## HPLC chromatogram of compound (2*R*,7*R*,*E*)-3i

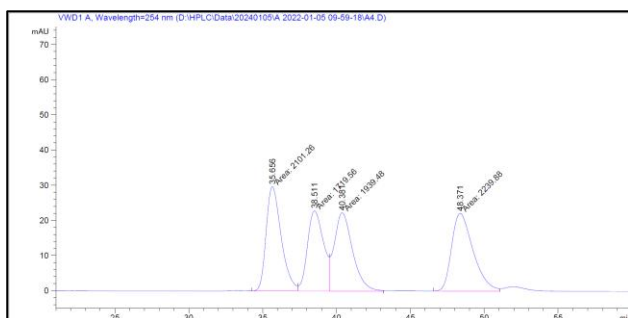

| Peak # | RetTime [min] | Type | Width [min] | Area [mAU*s] | Height [mAU] | Area %  |
|--------|---------------|------|-------------|--------------|--------------|---------|
| 1      | 35.656        | MF   | 1.1812      | 2101.25537   | 29.64985     | 26.2651 |
| 2      | 38.511        | MF   | 1.2568      | 1719.55811   | 22.80326     | 21.4940 |
| 3      | 40.381        | FM   | 1.4531      | 1939.48169   | 22.24508     | 24.2430 |
| 4      | 48.371        | MF   | 1.6876      | 2239.87817   | 22.12046     | 27.9979 |

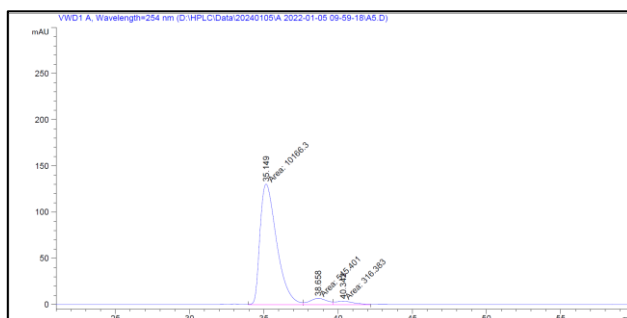

| Peak # | RetTime [min] | Type | Width [min] | Area [mAU*s] | Height [mAU] | Area %  |
|--------|---------------|------|-------------|--------------|--------------|---------|
| 1      | 35.149        | MF   | 1.2991      | 1.01663e4    | 130.42726    | 92.1855 |
| 2      | 38.658        | MF   | 1.3508      | 545.40112    | 6.72925      | 4.9456  |
| 3      | 40.342        | FM   | 1.4511      | 316.38281    | 3.63393      | 2.8689  |

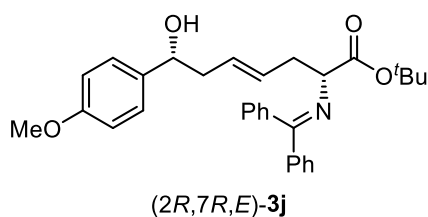

**tert-butyl (2*R*,7*R*,*E*)-2-((diphenylmethylene)amino)-7-hydroxy-7-(4-methoxyphenyl)hept-4-enoate ((2*R*,7*R*,*E*)-3j):** yield (81 mg, 84%); colorless oil;  $[\alpha]_D^{15} = +79.3$  ( $c$  0.47,  $\text{CH}_2\text{Cl}_2$ ); The product was analyzed by HPLC to determine the dr value and the enantiomeric excess: 17:1 dr, > 99% ee (Chiralpak IC, *i*-propanol/hexane = 10/90, flow rate 1.0 mL/min,  $\lambda = 254$  nm);  $t_r = 22.66, 24.13, 26.13$  and 29.62 min.

**$^1\text{H}$  NMR** (400 MHz, Chloroform-*d*)  $\delta$  7.64 (d,  $J = 7.6$  Hz, 2H), 7.46 – 7.40 (m, 3H), 7.39 – 7.30 (m, 3H), 7.24 – 7.20 (m, 2H), 7.18 – 7.13 (m, 2H), 6.83(d,  $J = 8.4$  Hz, 2H), 5.57 – 5.41 (m, 2H), 4.58 (dd,  $J = 7.6, 5.2$  Hz, 1H), 3.99 (t,  $J = 6.4$  Hz, 1H), 3.78 (s, 3H), 2.64 – 2.54 (m, 2H), 2.45 – 2.34 (m, 2H), 1.43 (s, 9H).

**$^{13}\text{C}$  NMR** (101 MHz, Chloroform-*d*)  $\delta$  171.0, 170.1, 158.9, 139.6, 136.6, 136.1, 130.4, 130.2, 128.8, 128.7, 128.5, 128.4, 128.0, 127.8, 127.0, 113.7, 81.0, 72.9, 66.0, 55.2, 42.7, 37.0, 28.0.

**HRMS** (ESI+) calcd. For  $\text{C}_{31}\text{H}_{36}\text{NO}_4$  ( $[\text{M}+\text{H}]^+$ ): 486.2639, found: 486.2645.

## HPLC chromatogram of compound (2*R*,7*R*,*E*)-3j

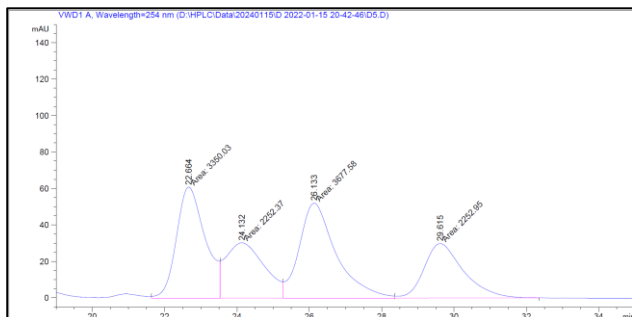

| Peak # | RetTime [min] | Type | Width [min] | Area [mAU*s] | Height [mAU] | Area %  |
|--------|---------------|------|-------------|--------------|--------------|---------|
| 1      | 22.664        | MF   | 0.9178      | 3350.02563   | 60.83315     | 29.0475 |
| 2      | 24.132        | FM   | 1.2391      | 2252.37036   | 30.29615     | 19.5299 |
| 3      | 26.133        | MF   | 1.1783      | 3677.58057   | 52.02008     | 31.8877 |
| 4      | 29.615        | FM   | 1.2585      | 2252.94653   | 29.83608     | 19.5349 |

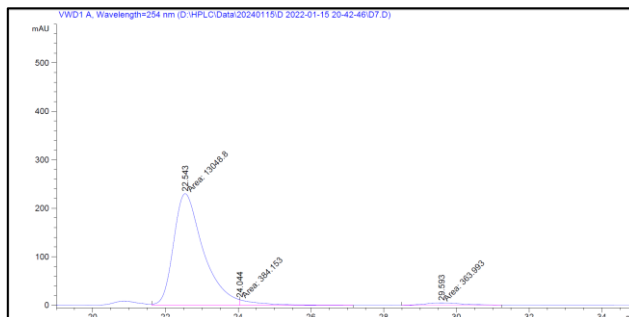

| Peak # | RetTime [min] | Type | Width [min] | Area [mAU*s] | Height [mAU] | Area %  |
|--------|---------------|------|-------------|--------------|--------------|---------|
| 1      | 22.543        | FM   | 0.9455      | 1.30488e4    | 230.02109    | 94.5775 |
| 2      | 24.044        | FM   | 0.5661      | 384.15259    | 11.30920     | 2.7843  |
| 3      | 29.593        | MM   | 1.2420      | 363.99332    | 4.88440      | 2.6382  |

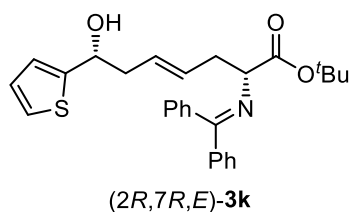

**tert-butyl (2*R*,7*R*,*E*)-2-((diphenylmethylene)amino)-7-hydroxy-7-(thiophen-2-yl)hept-4-enoate ((2*R*,7*R*,*E*)-3k):** yield (83 mg, 90%); colorless oil;  $[\alpha]_D^{15} = +72.5$  (*c* 0.56, CH<sub>2</sub>Cl<sub>2</sub>); The product was analyzed by HPLC to determine the dr value and the enantiomeric excess: 9:1 dr, > 99% ee (Chiralpak IC, *i*-propanol/hexane = 5/95, flow rate 1.0 mL/min,  $\lambda = 254$  nm);  $t_r = 31.16, 35.55, 37.47$  and 51.84 min.

**<sup>1</sup>H NMR** (400 MHz, Chloroform-*d*)  $\delta$  7.67 – 7.60 (m, 2H), 7.46 – 7.30 (m, 6H), 7.22 – 7.18 (m, 1H), 7.17 – 7.12 (m, 2H), 6.94 – 6.89 (m, 2H), 5.61 – 5.45 (m, 2H), 4.92 – 4.85 (m, 1H), 4.00 (dd, *J* = 7.0, 5.4 Hz, 1H), 2.64 – 2.57 (m, 2H), 2.57 – 2.45 (m, 2H), 1.43 (s, 9H).

**<sup>13</sup>C NMR** (101 MHz, Chloroform-*d*)  $\delta$  171.0, 170.2, 147.9, 139.6, 136.6, 131.1, 130.2, 128.8, 128.5, 128.4, 128.0, 127.9, 127.8, 126.5, 124.4, 123.5, 81.1, 69.3, 65.9, 42.7, 37.0, 28.0.

**HRMS** (ESI+) calcd. For C<sub>28</sub>H<sub>32</sub>NO<sub>3</sub>S ([*M*+*H*]<sup>+</sup>): 462.2097, found: 462.2090.

## HPLC chromatogram of compound (2*R*,7*R*,*E*)-3k

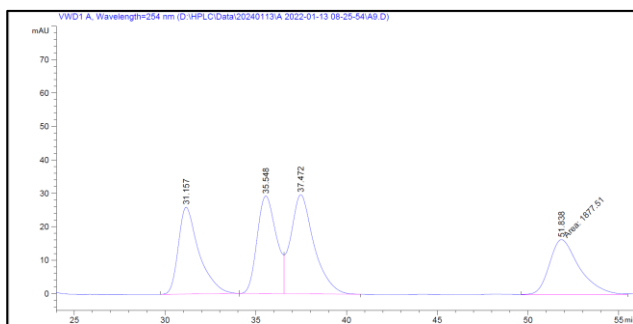

| Peak # | RetTime [min] | Type | Width [min] | Area [mAU*s] | Height [mAU] | Area %  |
|--------|---------------|------|-------------|--------------|--------------|---------|
| 1      | 31.157        | BB   | 1.1441      | 2053.90918   | 25.98606     | 23.5017 |
| 2      | 35.548        | BV   | 1.1126      | 2153.87036   | 29.19880     | 24.6455 |
| 3      | 37.472        | VB   | 1.2723      | 2654.13403   | 29.65247     | 30.3697 |
| 4      | 51.838        | MF   | 1.9049      | 1877.50952   | 16.42696     | 21.4832 |

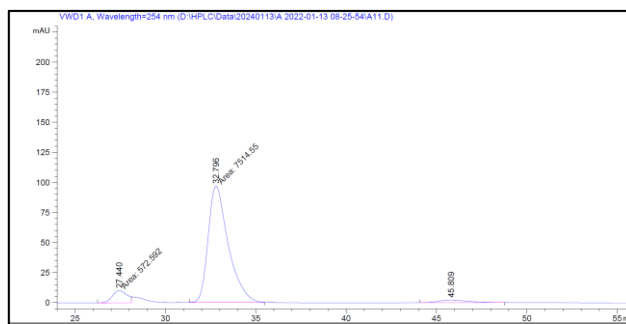

| Peak # | RetTime [min] | Type | Width [min] | Area [mAU*s] | Height [mAU] | Area %  |
|--------|---------------|------|-------------|--------------|--------------|---------|
| 1      | 27.440        | MF   | 0.9355      | 572.59235    | 10.20103     | 6.8773  |
| 2      | 32.796        | MM   | 1.2927      | 7514.54736   | 96.88213     | 90.2553 |
| 3      | 45.809        | BB   | 1.2687      | 238.74200    | 2.20232      | 2.8675  |

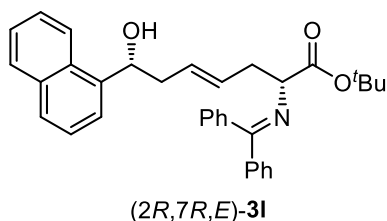

**tert-butyl (2*R*,7*R*,*E*)-2-((diphenylmethylene)amino)-7-hydroxy-7-(naphthalen-1-yl)hept-4-enoate ((2*R*,7*R*,*E*)-3k):** yield (86 mg, 85%); colorless oil;  $[\alpha]_D^{15} = +96.2$  (*c* 0.61, CH<sub>2</sub>Cl<sub>2</sub>); The product was analyzed by HPLC to determine the dr value and the enantiomeric excess: 17:1 dr, 98% ee (Chiralpak IC, *i*-propanol/hexane = 10/90, flow rate 1.0 mL/min,  $\lambda = 254$  nm);  $t_r = 14.21, 15.59, 17.97$  and  $26.85$  min.

**<sup>1</sup>H NMR** (400 MHz, Chloroform-*d*)  $\delta$  8.05 – 7.98 (m, 1H), 7.87 – 7.83 (m, 1H), 7.77 – 7.72 (m, 1H), 7.68 – 7.59 (m, 3H), 7.49 – 7.40 (m, 6H), 7.39 – 7.30 (m, 3H), 7.19 – 7.13 (m, 1H), 5.65 – 5.54 (m, 2H), 5.42 (dd, *J* = 8.6, 3.8 Hz, 1H), 4.02 (t, *J* = 6.2 Hz, 1H), 2.72 – 2.58 (m, 3H), 2.53 – 2.45 (m, 1H), 1.44 (s, 9H).

**<sup>13</sup>C NMR** (101 MHz, Chloroform-*d*)  $\delta$  171.0, 170.2, 139.6, 139.4, 136.6, 133.7, 130.6, 130.25, 130.22, 128.9, 128.8, 128.5, 128.4, 128.0, 127.8, 127.7, 125.9, 125.42, 125.37, 123.0, 122.8, 81.1, 69.9, 66.0, 41.8, 37.1, 28.1.

**HRMS** (ESI+) calcd. For C<sub>34</sub>H<sub>36</sub>NO<sub>3</sub> ( $[M+H]^+$ ): 506.2690, found: 506.2686.

## HPLC chromatogram of compound (2*R*,7*R*,*E*)-31

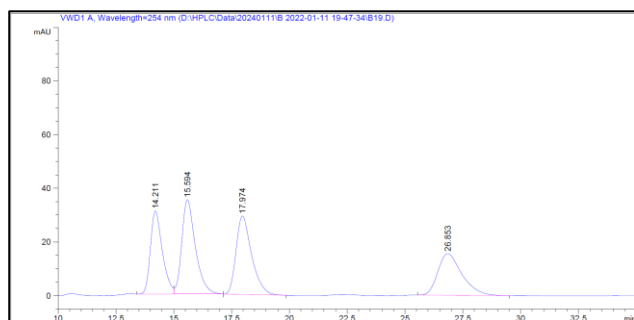

| Peak # | RetTime [min] | Type | Width [min] | Area [mAU*s] | Height [mAU] | Area %  |
|--------|---------------|------|-------------|--------------|--------------|---------|
| 1      | 14.211        | BV   | 0.5389      | 1112.84277   | 30.99708     | 22.0764 |
| 2      | 15.594        | VB   | 0.6128      | 1443.15125   | 35.16558     | 28.6290 |
| 3      | 17.974        | BB   | 0.7040      | 1367.06213   | 29.21193     | 27.1196 |
| 4      | 26.853        | BB   | 1.0606      | 1117.81140   | 15.51426     | 22.1750 |

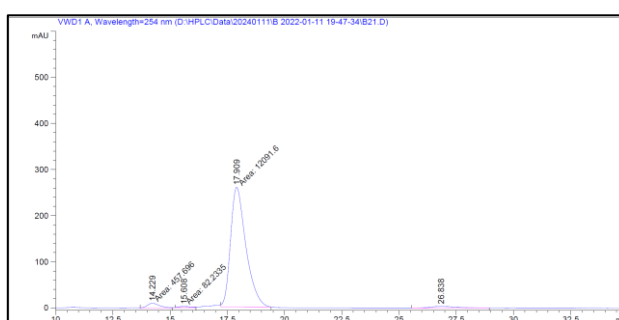

| Peak # | RetTime [min] | Type | Width [min] | Area [mAU*s] | Height [mAU] | Area %  |
|--------|---------------|------|-------------|--------------|--------------|---------|
| 1      | 14.229        | MM   | 0.6837      | 457.69583    | 11.15800     | 3.5553  |
| 2      | 15.608        | MF   | 0.5426      | 82.23348     | 2.52602      | 0.6388  |
| 3      | 17.909        | MM   | 0.7773      | 1.20916e4    | 259.27725    | 93.9251 |
| 4      | 26.838        | BB   | 0.8597      | 242.12468    | 3.39656      | 1.8808  |

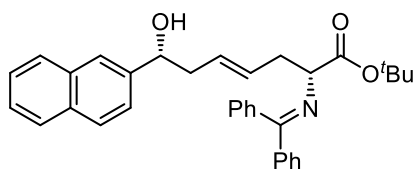

(2*R*,7*R*,*E*)-3m

**tert-butyl (2*R*,7*R*,*E*)-2-((diphenylmethylene)amino)-7-hydroxy-7-(naphthalen-2-yl)hept-4-enoate ((2*R*,7*R*,*E*)-3m):** yield (86 mg, 85%); colorless oil;  $[\alpha]_D^{15} = +80.8$  ( $c$  0.58,  $\text{CH}_2\text{Cl}_2$ ); The product was analyzed by HPLC to determine the dr value and the enantiomeric excess: 10:1 dr, > 99% ee (Chiralpak IE, *i*-propanol/hexane = 10/90, flow rate 1.0 mL/min,  $\lambda = 254$  nm);  $t_r = 18.25, 19.37, 20.79$  and  $22.73$  min.

**$^1\text{H}$  NMR** (400 MHz, Chloroform-*d*)  $\delta$  7.82 – 7.76 (m, 4H), 7.67 – 7.63 (m, 2H), 7.47 – 7.37 (m, 7H), 7.35 – 7.30 (m, 2H), 7.17 – 7.13 (m, 2H), 5.63 – 5.45 (m, 2H), 4.80 (dd,  $J = 8.0, 4.4$  Hz, 1H), 4.00 (dd,  $J = 6.8, 5.6$  Hz, 1H), 2.64 – 2.57 (m, 2H), 2.57 – 2.51 (m, 1H), 2.51 – 2.42 (m, 1H), 1.43 (s, 9H).

**$^{13}\text{C}$  NMR** (101 MHz, Chloroform-*d*)  $\delta$  171.0, 170.2, 141.4, 139.6, 136.6, 133.2, 132.8, 130.8, 130.3, 128.8, 128.5, 128.4, 128.04, 128.01, 127.9, 127.8, 127.6, 126.0, 125.7, 124.3, 124.0, 81.1, 73.2, 65.9, 42.8, 37.1, 28.0.

**HRMS** (ESI+) calcd. For  $\text{C}_{34}\text{H}_{36}\text{NO}_3$  ( $[\text{M}+\text{H}]^+$ ):506.2690, found: 506.2688.



## HPLC chromatogram of compound (2*R*,7*R*,*E*)-3*m*

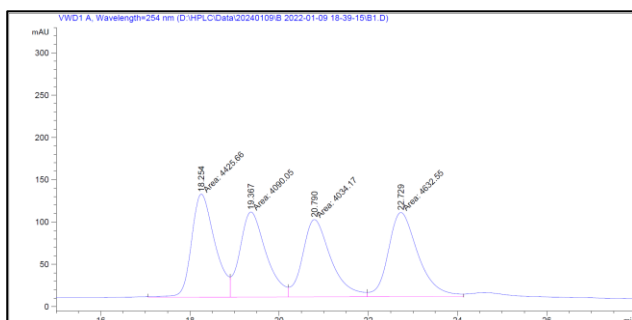

| Peak # | RetTime [min] | Type | Width [min] | Area [mAU*s] | Height [mAU] | Area %  |
|--------|---------------|------|-------------|--------------|--------------|---------|
| 1      | 18.254        | MF   | 0.6059      | 4425.66406   | 121.72798    | 25.7569 |
| 2      | 19.367        | MF   | 0.6782      | 4090.05396   | 100.51357    | 23.8037 |
| 3      | 20.790        | MF   | 0.7357      | 4034.16553   | 91.39146     | 23.4784 |
| 4      | 22.729        | FM   | 0.7762      | 4632.55078   | 99.46693     | 26.9610 |

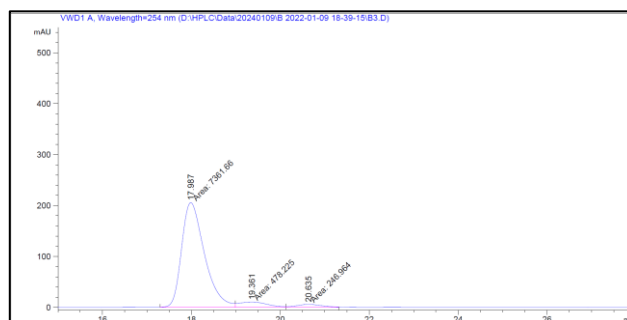

| Peak # | RetTime [min] | Type | Width [min] | Area [mAU*s] | Height [mAU] | Area %  |
|--------|---------------|------|-------------|--------------|--------------|---------|
| 1      | 17.987        | FM   | 0.5960      | 7361.66309   | 205.85715    | 91.0325 |
| 2      | 19.361        | MF   | 0.7500      | 478.22534    | 10.62706     | 5.9136  |
| 3      | 20.635        | FM   | 0.6850      | 246.96399    | 6.00870      | 3.0539  |

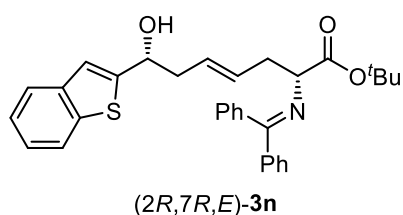

**tert-butyl (2*R*,7*R*,*E*)-7-(benzo[*b*]thiophen-2-yl)-2-((diphenylmethylene)amino)-7-hydroxyhept-4-enoate ((2*R*,7*R*,*E*)-3*n*):** yield (96 mg, 94%); colorless oil;  $[\alpha]_D^{15} = +67.1$  (*c* 0.56, CH<sub>2</sub>Cl<sub>2</sub>); The product was analyzed by HPLC to determine the dr value and the enantiomeric excess: 6:1 dr, > 99% ee (Chiralpak IE, *i*-propanol/hexane = 10/90, flow rate 1.0 mL/min,  $\lambda = 254$  nm);  $t_r = 17.02, 18.66, 19.62$  and  $21.63$  min.

**<sup>1</sup>H NMR** (400 MHz, Chloroform-*d*)  $\delta$  7.78 (d, *J* = 7.6 Hz, 1H), 7.69 – 7.60 (m, 3H), 7.44 – 7.36 (m, 4H), 7.35 – 7.26 (m, 4H), 7.17 – 7.09 (m, 3H), 5.66 – 5.46 (m, 2H), 4.95 (t, *J* = 6.2 Hz, 1H), 4.00 (t, *J* = 6.2 Hz, 1H), 2.62 – 2.57 (m, 3H), 2.56 – 2.50 (m, 1H), 1.42 (s, 9H).

**<sup>13</sup>C NMR** (101 MHz, Chloroform-*d*)  $\delta$  170.9, 170.2, 148.6, 139.6, 139.5, 139.3, 136.6, 131.4, 130.3, 128.8, 128.5, 128.4, 128.0, 127.8, 127.5, 124.1, 124.0, 123.4, 122.4, 119.9, 81.1, 69.7, 65.8, 42.4, 37.0, 28.0.

**HRMS** (ESI+) calcd. For C<sub>32</sub>H<sub>34</sub>NO<sub>3</sub>S ([*M*+*H*]<sup>+</sup>): 512.2254, found: 512.2255.

## HPLC chromatogram of compound (2*R*,7*R*,*E*)-3n

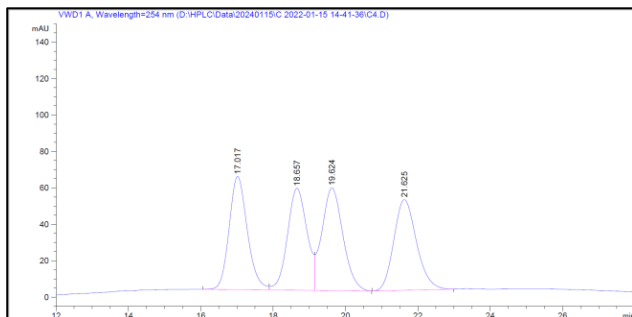

| Peak # | RetTime [min] | Type | Width [min] | Area [mAU*s] | Height [mAU] | Area %  |
|--------|---------------|------|-------------|--------------|--------------|---------|
| 1      | 17.017        | BV   | 0.5347      | 2170.81860   | 62.12012     | 24.8817 |
| 2      | 18.624        | VB   | 0.6149      | 2289.83154   | 56.36955     | 26.2458 |
| 3      | 19.624        | VB   | 0.6149      | 2289.83154   | 56.36955     | 26.2458 |
| 4      | 21.625        | BB   | 0.6723      | 2167.96558   | 49.75972     | 24.8490 |

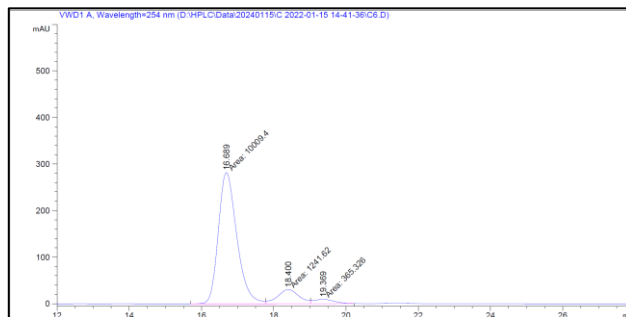

| Peak # | RetTime [min] | Type | Width [min] | Area [mAU*s] | Height [mAU] | Area %  |
|--------|---------------|------|-------------|--------------|--------------|---------|
| 1      | 16.689        | MF   | 0.5916      | 1.00094e4    | 281.99188    | 86.1665 |
| 2      | 18.400        | MF   | 0.6789      | 1241.61768   | 30.47942     | 10.6885 |
| 3      | 19.369        | FM   | 0.6596      | 365.32611    | 9.23127      | 3.1449  |

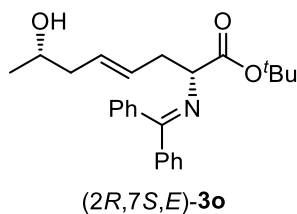

**tert-butyl (2*R*,7*S*,*E*)-2-((diphenylmethylene)amino)-7-hydroxyoct-4-enoate ((2*R*,7*S*,*E*)-3o):** yield (42 mg, 53%); colorless oil;  $[\alpha]_D^{25} = +69.7$  (*c* 0.47, CH<sub>2</sub>Cl<sub>2</sub>); The product was analyzed by HPLC to determine the dr value and the enantiomeric excess: 1.3:1 dr, 98% ee (Chiralpak AD-H, *i*-propanol/hexane = 5/95, flow rate 1.0 mL/min,  $\lambda = 254$  nm);  $t_r = 6.06, 6.67, 7.88$  and 9.97 min.

**<sup>1</sup>H NMR** (400 MHz, Chloroform-*d*)  $\delta$  7.67 – 7.57 (m, 2H), 7.48 – 7.40 (m, 3H), 7.37 (d, *J* = 7.0 Hz, 1H), 7.35 – 7.28 (m, 2H), 7.21 – 7.09 (m, 2H), 5.54 – 5.39 (m, 2H), 4.04 – 3.94 (m, 1H), 3.79 – 3.66 (m, 1H), 2.67 – 2.51 (m, 2H), 2.21 – 2.13 (m, 1H), 2.11 – 1.99 (m, 1H), 1.442 (s, 4.81H, major), 1.436 (s, 3.99H, minor), 1.14 (d, *J* = 6.0 Hz, 3H).

**<sup>13</sup>C NMR** (101 MHz, Chloroform-*d*)  $\delta$  171.0, 170.9, 170.11, 170.06, 139.60, 139.57, 136.6, 130.2, 130.1, 130.0, 129.1, 129.0, 128.7, 128.5, 128.43, 128.411, 128.0, 127.81, 127.77, 81.1, 81.0, 67.0, 66.9, 66.0, 42.6, 42.5, 37.13, 37.10, 28.1, 22.6.

**HRMS** (ESI+) calcd. For C<sub>25</sub>H<sub>32</sub>NO<sub>3</sub> ([M+H]<sup>+</sup>): 394.2377, found: 394.2382.

## HPLC chromatogram of compound (2*R*,7*S*,*E*)-3o

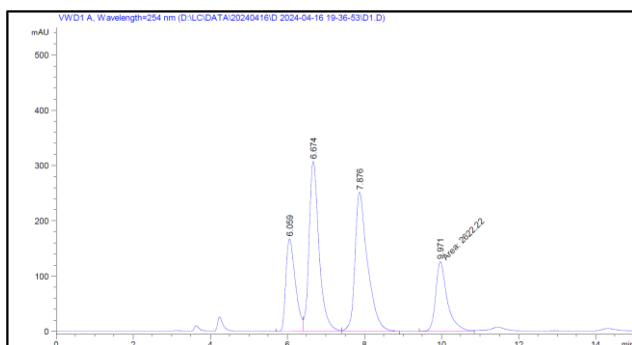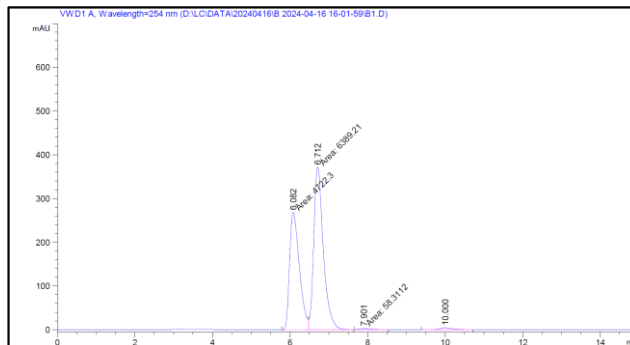

| Peak # | RetTime [min] | Type | Width [min] | Area [mAU*s] | Height [mAU] | Area %  |
|--------|---------------|------|-------------|--------------|--------------|---------|
| 1      | 6.059         | BV   | 0.2591      | 2837.15674   | 167.20161    | 17.0600 |
| 2      | 6.674         | VV   | 0.2688      | 5511.17139   | 307.41818    | 33.1390 |
| 3      | 7.876         | VB   | 0.3251      | 5659.89893   | 251.51981    | 34.0334 |
| 4      | 9.971         | MF   | 0.3471      | 2622.21802   | 125.90105    | 15.7676 |

| Peak # | RetTime [min] | Type | Width [min] | Area [mAU*s] | Height [mAU] | Area %  |
|--------|---------------|------|-------------|--------------|--------------|---------|
| 1      | 6.082         | MF   | 0.2934      | 4722.30469   | 268.28632    | 41.8783 |
| 2      | 6.712         | FM   | 0.2866      | 6389.21484   | 371.52213    | 56.6608 |
| 3      | 7.901         | FM   | 0.3403      | 58.31115     | 2.85550      | 0.5171  |
| 4      | 10.000        | VB R | 0.3171      | 106.41431    | 4.82227      | 0.9437  |

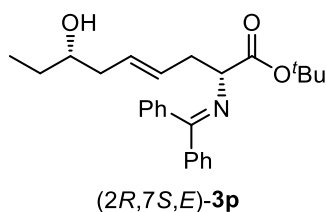

**tert-butyl (2R,7S,E)-2-((diphenylmethylene)amino)-7-hydroxynon-4-enoate ((2R,7S,E)-3p):** yield (53 mg, 65%); colorless oil;  $[\alpha]_D^{25} = +52.3$  ( $c$  0.44,  $\text{CH}_2\text{Cl}_2$ ); The product was analyzed by HPLC to determine the dr value and the enantiomeric excess: 1.6:1 dr, 97% ee (Chiralpak IC, *i*-propanol/hexane = 5/95, flow rate 1.0 mL/min,  $\lambda = 254$  nm);  $t_r = 18.62, 20.28, 22.70$  and  $27.13$  min.  **$^1\text{H}$  NMR** (400 MHz, Chloroform-*d*) 7.69 – 7.64 (m, 2H), 7.48 – 7.41 (m, 3H), 7.40 – 7.30 (m, 3H), 7.20 – 7.12 (m, 2H), 5.54 – 5.41 (m, 2H), 4.06 – 3.91 (m, 1H), 3.56 – 3.40 (m, 1H), 2.68 – 2.55 (m, 2H), 2.24 – 2.17 (m, 1H), 2.12 – 2.01 (m, 1H), 1.49 – 1.47 (m, 2H), 1.440 (s, 5.93H, major), 1.435 (s, 2.95H, minor),.

**$^{13}\text{C}$  NMR** (101 MHz, Chloroform-*d*)  $\delta$  170.99, 170.96, 170.11, 170.06, 139.6, 136.6, 130.2, 129.9, 129.2, 129.0, 128.7, 128.530, 128.526, 128.43, 128.40, 128.0, 127.81, 127.78, 81.1, 81.0, 72.1, 72.0, 66.1, 66.0, 40.3, 40.2, 37.2, 37.1, 29.4, 28.1, 9.9.

**HRMS** (ESI+) calcd. For  $\text{C}_{26}\text{H}_{34}\text{NO}_3$  ( $[\text{M}+\text{H}]^+$ ): 408.2533, found: 408.2535.

**HPLC chromatogram of compound (2R,7S,E)-3p**

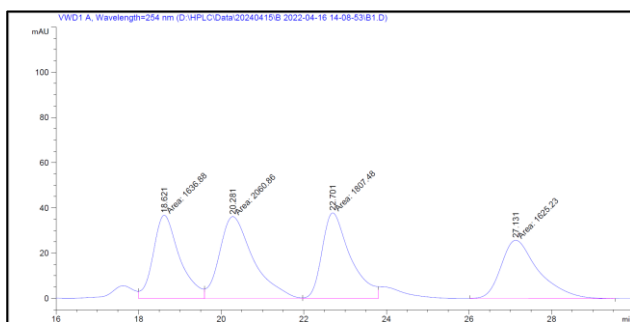

| Peak # | RetTime [min] | Type | Width [min] | Area [mAU*s] | Height [mAU] | Area %  |
|--------|---------------|------|-------------|--------------|--------------|---------|
| 1      | 18.621        | FM   | 0.7406      | 1636.87512   | 36.83912     | 22.9561 |
| 2      | 20.281        | MF   | 0.9477      | 2060.85889   | 36.24128     | 28.9022 |
| 3      | 22.701        | FM   | 0.7950      | 1807.48132   | 37.89495     | 25.3488 |
| 4      | 27.131        | FM   | 1.0496      | 1625.23206   | 25.80704     | 22.7928 |

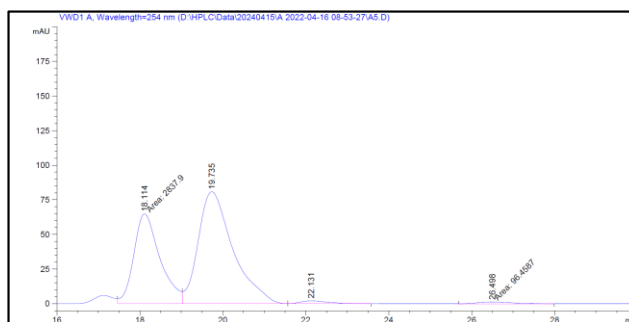

| Peak # | RetTime [min] | Type | Width [min] | Area [mAU*s] | Height [mAU] | Area %  |
|--------|---------------|------|-------------|--------------|--------------|---------|
| 1      | 18.114        | FM   | 0.7301      | 2837.89990   | 64.78103     | 36.8076 |
| 2      | 19.735        | VB   | 0.8701      | 4692.49414   | 80.72861     | 60.8618 |
| 3      | 22.131        | BB   | 0.6278      | 83.23144     | 1.91992      | 1.0795  |
| 4      | 26.498        | MM   | 1.1292      | 96.45875     | 1.42376      | 1.2511  |

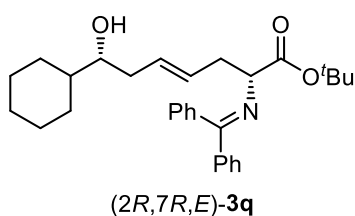

**tert-butyl (2R,7R,E)-7-cyclohexyl-2-((diphenylmethylene)amino)-7-hydroxyhept-4-enoate ((2R,7R,E)-3q):** yield (60 mg, 65%); colorless oil;  $[\alpha]_D^{15} = +61.7$  (*c* 0.60, CH<sub>2</sub>Cl<sub>2</sub>); The product was analyzed by HPLC to determine the dr value and the enantiomeric excess: 11:1 dr, > 99% ee (Chiralpak IC + Chiralpak IE, *i*-propanol/hexane = 10/90, flow rate 0.75 mL/min,  $\lambda = 254$  nm);  $t_r = 28.24, 30.19, 33.25$  and  $35.83$  min.

**<sup>1</sup>H NMR** (400 MHz, Chloroform-*d*)  $\delta$  7.67 – 7.61 (m, 2H), 7.45 – 7.40 (m, 3H), 7.40 – 7.29 (m, 3H), 7.19 – 7.13 (m, 2H), 5.53 – 5.44 (m, 2H), 3.99 (dd, *J* = 7.2, 5.2 Hz, 1H), 3.31 – 3.24 (m, 1H), 2.67 – 2.55 (m, 2H), 2.26 – 2.19 (m, 1H), 2.09 – 2.01 (m, 1H), 1.85 – 1.59 (m, 7H), 1.44 (s, 9H), 1.19 – 1.13 (m, 2H), 1.04 – 0.93 (m, 2H).

**<sup>13</sup>C NMR** (101 MHz, Chloroform-*d*)  $\delta$  171.0, 170.0, 139.6, 136.7, 130.2, 129.9, 129.5, 128.7, 128.5, 128.4, 128.0, 127.8, 81.0, 77.2, 74.9, 66.1, 42.8, 37.5, 37.1, 29.0, 28.2, 28.1, 26.5, 26.2, 26.1.

**HRMS** (ESI+) calcd. For C<sub>30</sub>H<sub>40</sub>NO<sub>3</sub> ([M+H]<sup>+</sup>): 462.3003, found: 462.3002.

### HPLC chromatogram of compound (2R,7R,E)-3q

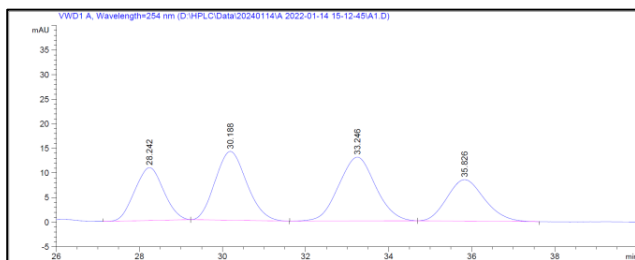

| Peak # | RetTime [min] | Type | Width [min] | Area [mAU*s] | Height [mAU] | Area %  |
|--------|---------------|------|-------------|--------------|--------------|---------|
| 1      | 28.242        | BB   | 0.7407      | 518.53638    | 10.75115     | 20.0971 |
| 2      | 30.188        | BB   | 0.7958      | 736.80237    | 13.98249     | 28.5566 |
| 3      | 33.246        | BB   | 0.9167      | 798.75641    | 12.96627     | 30.9578 |
| 4      | 35.826        | BB   | 0.9223      | 526.05438    | 8.42655      | 20.3885 |

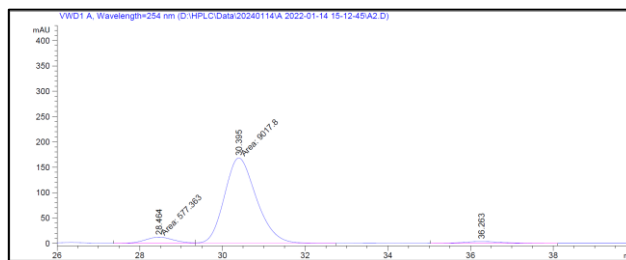

| Peak # | RetTime [min] | Type | Width [min] | Area [mAU*s] | Height [mAU] | Area %  |
|--------|---------------|------|-------------|--------------|--------------|---------|
| 1      | 28.464        | MF   | 0.7882      | 577.36255    | 12.20912     | 5.8762  |
| 2      | 30.395        | FM   | 0.8932      | 9017.79980   | 168.26625    | 91.7799 |
| 3      | 36.263        | BB   | 0.8212      | 230.30092    | 3.68481      | 2.3439  |

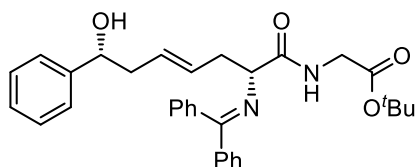

(2R,7R,E)-Gly-Gly-3r

**tert-butyl ((2R,7R,E)-2-((diphenylmethylene)amino)-7-hydroxy-7-phenylhept-4-enoyl)glycinate ((2R,7R,E)-Gly-Gly-3r):** yield (69 mg, 73%); colorless oil;  $[\alpha]_D^{20} = -6.0$  ( $c$  0.44,  $\text{CH}_2\text{Cl}_2$ ); The product was analyzed by HPLC to determine the dr value and the enantiomeric excess: 13:1 dr, > 99% ee (Chiralcel OD-H, *i*-propanol/hexane = 10/90, flow rate 1.0 mL/min,  $\lambda = 254$  nm);  $t_r = 9.77, 10.64, 12.47$  and  $13.94$  min.

**$^1\text{H}$  NMR** (400 MHz, Chloroform-*d*)  $\delta$  7.65 – 7.57 (m, 2H), 7.45 – 7.27 (m, 8H), 7.24 – 7.21 (m, 3H), 7.17 – 7.14 (m, 1H), 7.11 – 7.00 (m, 2H), 5.47 – 5.39 (m, 1H), 5.37 – 5.20 (d,  $J = 7.5$  Hz, 1H), 4.59 (dd,  $J = 7.6, 4.4$  Hz, 1H), 4.00 (t,  $J = 6.2$  Hz, 1H), 3.91 (dd,  $J = 5.6, 2.8$  Hz, 1H), 2.47 – 2.27 (m, 4H), 1.40 (s, 9H).

**$^{13}\text{C}$  NMR** (101 MHz, Chloroform-*d*)  $\delta$  172.9, 169.7, 168.8, 144.1, 139.1, 135.7, 132.4, 130.7, 130.0, 129.9, 128.8, 128.7, 128.2, 127.6, 127.1, 125.7, 82.1, 72.8, 65.8, 42.5, 41.7, 38.7, 28.0.

**HRMS** (ESI+) calcd. For  $\text{C}_{32}\text{H}_{37}\text{N}_2\text{O}_4$  ( $[\text{M}+\text{H}]^+$ ): 513.2748, found: 513.2749.

## HPLC chromatogram of compound (2*R*,7*R*,*E*)-Gly-Gly-3*r*

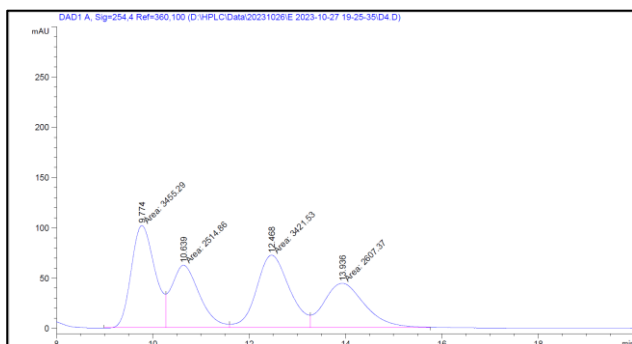

| Peak # | RetTime [min] | Type | Width [min] | Area [mAU*s] | Height [mAU] | Area %  |
|--------|---------------|------|-------------|--------------|--------------|---------|
| 1      | 9.774         | MF   | 0.5676      | 3455.29468   | 101.46545    | 28.7964 |
| 2      | 10.639        | FM   | 0.6758      | 2514.85864   | 62.02573     | 20.9588 |
| 3      | 12.468        | FM   | 0.7920      | 3421.53467   | 72.00500     | 28.5150 |
| 4      | 13.936        | FM   | 0.9849      | 2607.36938   | 44.12298     | 21.7298 |

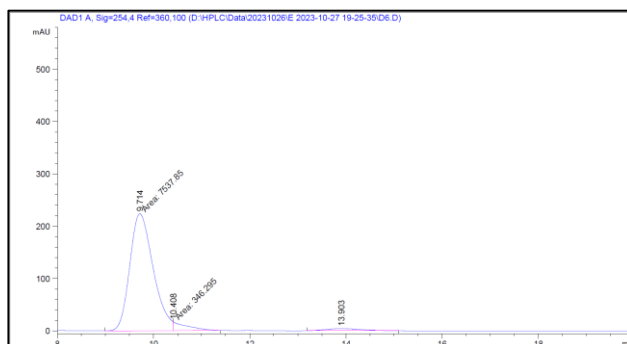

| Peak # | RetTime [min] | Type | Width [min] | Area [mAU*s] | Height [mAU] | Area %  |
|--------|---------------|------|-------------|--------------|--------------|---------|
| 1      | 9.714         | MF   | 0.5622      | 7537.85400   | 223.44754    | 93.0862 |
| 2      | 10.408        | FM   | 0.3393      | 346.29477    | 17.00795     | 4.2764  |
| 3      | 13.903        | BB   | 0.5977      | 213.56754    | 4.20403      | 2.6374  |

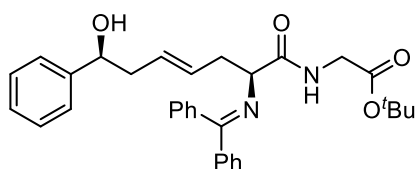

(2*S*,7*S*,*E*)-2-Gly-Gly-3*r*

**tert-butyl (2*S*,7*S*,*E*)-7-cyclohexyl-2-((diphenylmethylene)amino)-7-hydroxyhept-4-enoate ((2*S*,7*S*,*E*)-Gly-Gly-3*r*):** yield (72 mg, 70%); colorless oil;  $[\alpha]_D^{20} = +6.2$  (*c* 0.69, CH<sub>2</sub>Cl<sub>2</sub>); The product was analyzed by HPLC to determine the dr value and the enantiomeric excess: 13:1 dr, > 99% ee (Chiralcel OD-H, *i*-propanol/hexane = 10/90, flow rate 1.0 mL/min,  $\lambda = 254$  nm);  $t_r = 9.77, 10.64, 12.47$  and 13.94 min.

**HRMS (ESI+)** calcd. For C<sub>32</sub>H<sub>37</sub>N<sub>2</sub>O<sub>4</sub> ([M+H]<sup>+</sup>): 513.2748, found: 513.2742.

## HPLC chromatogram of compound (2*S*,7*S*,*E*)-Gly-Gly-3*r*

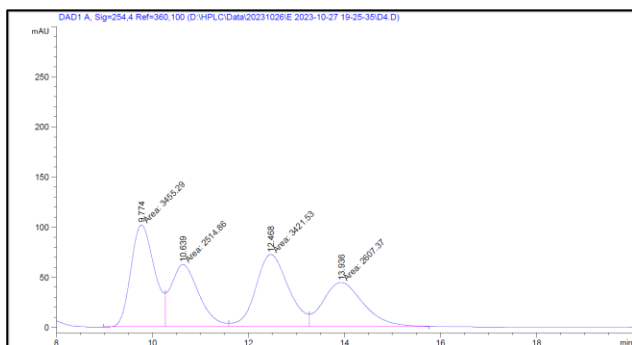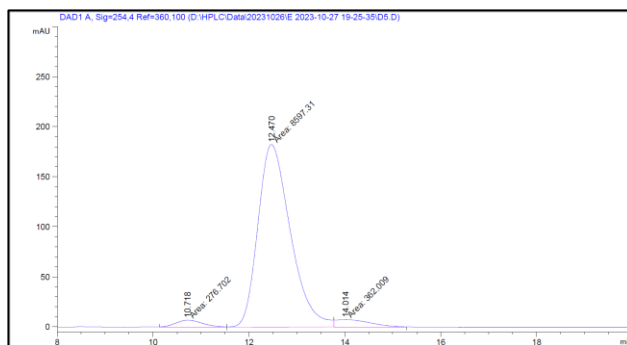

| Peak # | RetTime [min] | Type | Width [min] | Area [mAU*s] | Height [mAU] | Area %  |
|--------|---------------|------|-------------|--------------|--------------|---------|
| 1      | 9.774         | MF   | 0.5676      | 3455.29468   | 101.46545    | 28.7964 |
| 2      | 10.639        | FM   | 0.6758      | 2514.85864   | 62.02573     | 20.9588 |
| 3      | 12.468        | FM   | 0.7920      | 3421.53467   | 72.00500     | 28.5150 |
| 4      | 13.936        | FM   | 0.9849      | 2607.36938   | 44.12298     | 21.7298 |

| Peak # | RetTime [min] | Type | Width [min] | Area [mAU*s] | Height [mAU] | Area %  |
|--------|---------------|------|-------------|--------------|--------------|---------|
| 1      | 10.718        | MF   | 0.6552      | 276.70209    | 7.03890      | 2.9959  |
| 2      | 12.470        | MF   | 0.7852      | 8597.31250   | 182.48773    | 93.0846 |
| 3      | 14.014        | FM   | 0.8213      | 362.00897    | 7.34606      | 3.9195  |

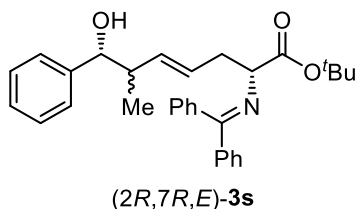

**tert-butyl (2R,7R,E)-2-((diphenylmethylene)amino)-7-hydroxy-6-methyl-7-phenylhept-4-enoate ((2R,7R,E)-3s):** yield (74 mg, 79%); colorless oil;  $[\alpha]_D^{25} = +74.3$  (*c* 0.39, CH<sub>2</sub>Cl<sub>2</sub>); The product was analyzed by <sup>1</sup>H NMR to determine the dr value and the enantiomeric excess: 1:1 dr.

<sup>1</sup>H NMR (400 MHz, Chloroform-*d*) δ 7.69 – 7.57 (m, 2H), 7.48 – 7.40 (m, 3H), 7.39 – 7.35 (m, 1H), 7.35 – 7.28 (m, 3H), 7.27 – 7.20 (m, 4H), 7.19 – 7.12 (m, 2H), 5.67 – 5.53 (m, 0.50H, minor), 5.49 – 5.31 (m, 1.47H, major), 4.56 (d, *J* = 4.8 Hz, 0.45H, minor), 4.23 (d, *J* = 8.0 Hz, 0.47H, major), 4.07 – 3.91 (m, 1H), 2.67 – 2.51 (m, 2H), 2.45 – 2.21 (m, 1H), 1.44 (s, 4.21H, minor), 1.43 (s, 4.39H, major), 0.89 (d, *J* = 6.8 Hz, 1.51H), 0.80 (d, *J* = 6.8 Hz, 1.50H).

<sup>13</sup>C NMR (101 MHz, Chloroform-*d*) δ 171.0, 170.9, 170.2, 170.1, 142.44, 142.41, 139.64, 139.56, 136.7, 136.6, 134.9, 134.5, 130.3, 130.2, 129.2, 128.8, 128.5, 128.4, 128.1, 128.01, 127.98, 127.90, 127.8, 127.6, 127.5, 127.1, 126.9, 126.4, 81.1, 81.0, 77.9, 66.1, 66.0, 45.6, 43.6, 37.13, 37.06, 28.1, 16.9, 14.1.

**HRMS (ESI+)** calcd. For C<sub>31</sub>H<sub>36</sub>NO<sub>3</sub> ([M+H]<sup>+</sup>): 470.2690, found: 470.2691.

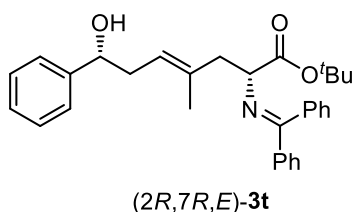

**tert-butyl (2R,7R,E)-2-((diphenylmethylene)amino)-7-hydroxy-4-methyl-7-phenylhept-4-enoate ((2R,7R,E)-3t):** yield (76 mg, 81%); colorless oil;  $[\alpha]_D^{25} = +105.5$  (*c* 0.41, CH<sub>2</sub>Cl<sub>2</sub>); The product was analyzed by HPLC to determine the dr value and the enantiomeric excess: > 20:1 dr, > 99% ee (Chiralpak IC, *i*-propanol/hexane = 5/95, flow rate 1.0 mL/min, λ = 254 nm); *t<sub>r</sub>* = 23.93, 28.07, 32.10 and 34.49 min.

$^1\text{H NMR}$  (400 MHz, Chloroform-*d*)  $\delta$  7.63 (d,  $J = 7.0$  Hz, 2H), 7.46 – 7.39 (m, 3H), 7.39 – 7.26 (m, 7H), 7.22 (q,  $J = 3.8$  Hz, 1H), 7.14 (dd,  $J = 6.5, 2.9$  Hz, 2H), 5.30 – 5.13 (m, 1H), 4.60 (dd,  $J = 8.0, 5.1$  Hz, 1H), 4.06 (dd,  $J = 8.1, 5.2$  Hz, 1H), 2.62 (dd,  $J = 13.4, 5.3$  Hz, 1H), 2.55 (dd,  $J = 13.4, 8.0$  Hz, 1H), 2.49 – 2.31 (m, 2H), 1.44 (s, 9H), 1.42 (s, 3H).

$^{13}\text{C NMR}$  (101 MHz, Chloroform-*d*)  $\delta$  171.3, 169.8, 144.1, 139.6, 136.4, 135.4, 130.2, 128.7, 128.5, 128.32, 128.28, 128.0, 127.9, 127.3, 125.7, 123.2, 81.0, 73.7, 64.9, 43.89, 38.3, 28.0, 16.6.

**HRMS** (ESI+) calcd. For  $\text{C}_{31}\text{H}_{36}\text{NO}_3$  ( $[\text{M}+\text{H}]^+$ ): 470.2690, found: 470.2690.

### HPLC chromatogram of compound (2*R*,7*R*,*E*)-3t

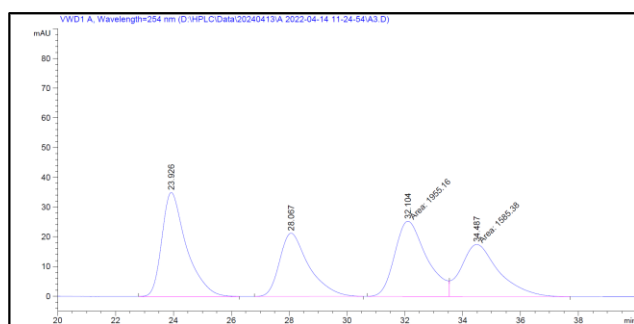

| Peak # | RetTime [min] | Type | Width [min] | Area [mAU*s] | Height [mAU] | Area %  |
|--------|---------------|------|-------------|--------------|--------------|---------|
| 1      | 23.926        | BB   | 0.8571      | 2047.70337   | 34.97396     | 28.9281 |
| 2      | 28.067        | BB   | 1.0231      | 1490.34656   | 21.28062     | 21.0543 |
| 3      | 32.104        | MF   | 1.2867      | 1955.16443   | 25.32477     | 27.6208 |
| 4      | 34.487        | FM   | 1.5080      | 1585.38269   | 17.52140     | 22.3968 |

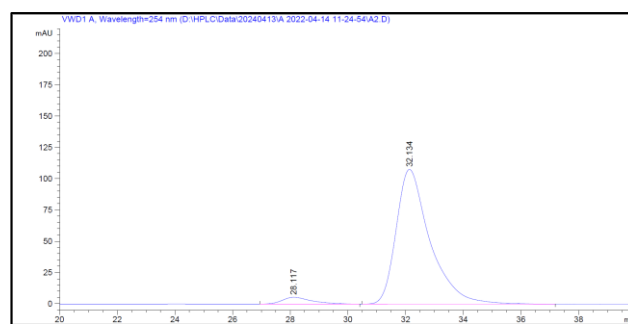

| Peak # | RetTime [min] | Type | Width [min] | Area [mAU*s] | Height [mAU] | Area %  |
|--------|---------------|------|-------------|--------------|--------------|---------|
| 1      | 28.117        | BB   | 0.9447      | 374.76321    | 5.41353      | 4.0979  |
| 2      | 32.134        | BB   | 1.2027      | 8770.46875   | 107.62825    | 95.9021 |

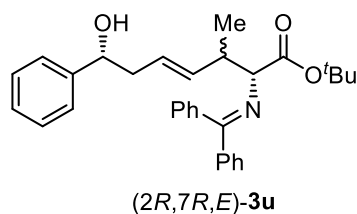

**tert-butyl (2*R*,7*R*,*E*)-2-((diphenylmethylene)amino)-7-hydroxy-3-methyl-7-phenylhept-4-enoate ((2*R*,7*R*,*E*)-3u):** yield (81 mg, 86%); colorless oil;  $[\alpha]_D^{25} = +108.2$  ( $c$  0.46,  $\text{CH}_2\text{Cl}_2$ ); The product was analyzed by  $^1\text{H NMR}$  to determine the dr value: 2:1 dr.

$^1\text{H NMR}$  (400 MHz, Chloroform-*d*)  $\delta$  7.69 – 7.62 (m, 2H), 7.46 – 7.44 (m, 3H), 7.39 – 7.29 (m, 7H), 7.25 – 7.21 (d,  $J = 6.5$  Hz, 1H), 7.17 – 7.07 (m, 2H), 5.86 – 5.76 (m, 0.64H, minor), 5.55 – 5.39 (m, 1.32H, major), 4.63 (dd,  $J = 8.4, 4.0$  Hz, 1H), 3.85 (d,  $J = 4.8$  Hz, 0.62H, major), 3.81 (d,  $J = 6.4$  Hz, 0.33H, minor), 2.94 – 2.78 (m, 1H), 2.64 – 2.17 (m, 3H), 1.43 (s, 6.04H, major), 1.42 (s, 3.00H, minor), 1.07 (d,  $J = 6.8$  Hz, 0.98H, minor), 0.96 (d,  $J = 6.8$  Hz, 3H, major).

$^{13}\text{C NMR}$  (101 MHz, Chloroform-*d*)  $\delta$  171.0, 170.6, 170.5, 170.3, 144.1, 144.0, 139.64, 139.59,



137.03, 136.98, 136.8, 136.7, 130.2, 128.8, 128.5, 128.44, 128.39, 128.35, 128.28, 128.23, 128.0, 127.8, 127.3, 127.2, 126.2, 125.9, 125.8, 125.7, 81.0, 73.1, 72.9, 71.0, 70.9, 43.2, 42.8, 41.2, 40.9, 28.1, 17.8, 16.5.

**HRMS** (ESI+) calcd. For C<sub>31</sub>H<sub>36</sub>NO<sub>3</sub> ([M+H]<sup>+</sup>): 470.2690, found: 470.2692.

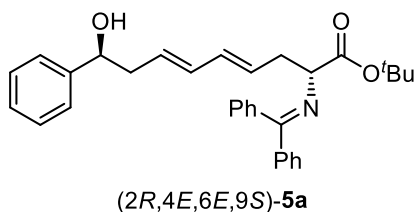

**tert-butyl (2R,4E,6E,9S)-2-((diphenylmethylene)amino)-9-hydroxy-9-phenylnona-4,6-dienoate ((2R,4E,6E,9S)-5a)**: yield (91 mg, 94%); colorless oil;  $[\alpha]_D^{20} = +10.2$  (*c* 0.45, CH<sub>2</sub>Cl<sub>2</sub>); The product was analyzed by HPLC to determine the dr value and the enantiomeric excess: 16:1 dr, > 99% ee (Chiralpak AD-H, *i*-propanol/hexane = 10/90, flow rate 1.0 mL/min,  $\lambda = 254$  nm);  $t_r = 7.94, 8.54, 13.55$  and 21.26 min.

**<sup>1</sup>H NMR** (400 MHz, Chloroform-*d*)  $\delta$  7.59 – 7.53 (m, 2H), 7.37 – 7.22 (m, 10H), 7.19 – 7.16 (m, 1H), 7.10 – 7.02 (m, 2H), 6.05 – 5.89 (m, 2H), 5.52 – 5.34 (m, 2H), 4.61 (dd, *J* = 7.2, 5.6 Hz, 1H), 3.92 (dd, *J* = 7.4, 5.4 Hz, 1H), 2.63 – 2.49 (m, 2H), 2.47 – 2.36 (m, 2H), 1.36 (s, 9H).

**<sup>13</sup>C NMR** (101 MHz, Chloroform-*d*)  $\delta$  170.8, 170.2, 143.8, 139.7, 136.6, 133.7, 132.5, 130.2, 129.1, 128.8, 128.5, 128.3, 128.0, 127.9, 127.7, 127.5, 125.7, 81.0, 73.6, 66.0, 42.7, 36.9, 28.0.

**HRMS** (ESI+) calcd. For C<sub>32</sub>H<sub>36</sub>NO<sub>3</sub> ([M+H]<sup>+</sup>): 482.2690, found: 482.2695.

### HPLC chromatogram of compound (2R,4E,6E,9S)-5a

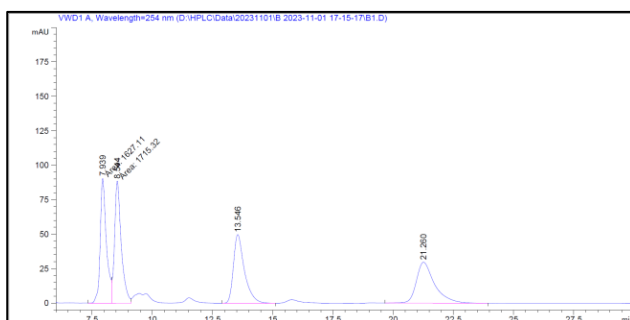

| Peak # | RetTime [min] | Type | Width [min] | Area [mAU*s] | Height [mAU] | Area %  |
|--------|---------------|------|-------------|--------------|--------------|---------|
| 1      | 7.939         | MF   | 0.2998      | 1627.10864   | 90.44197     | 25.0979 |
| 2      | 8.544         | FM   | 0.3227      | 1715.32166   | 88.60120     | 26.4586 |
| 3      | 13.546        | BB   | 0.4673      | 1576.58984   | 49.81060     | 24.3187 |
| 4      | 21.260        | BB   | 0.7761      | 1564.02295   | 29.66586     | 24.1248 |

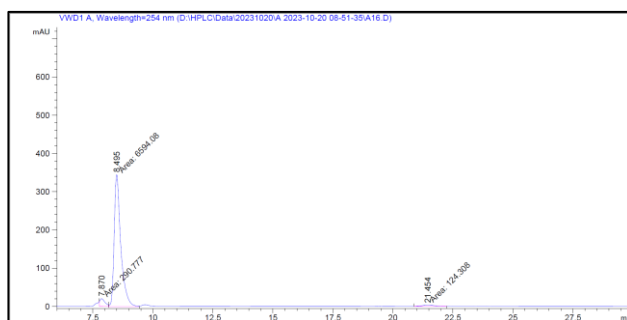

| Peak # | RetTime [min] | Type | Width [min] | Area [mAU*s] | Height [mAU] | Area %  |
|--------|---------------|------|-------------|--------------|--------------|---------|
| 1      | 7.870         | FM   | 0.2394      | 290.77689    | 20.24337     | 4.1485  |
| 2      | 8.495         | MM   | 0.3187      | 6594.08301   | 344.87564    | 94.0780 |
| 3      | 21.454        | MM   | 0.7147      | 124.30778    | 2.89887      | 1.7735  |

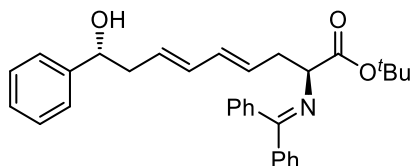

(2*S*,4*E*,6*E*,9*R*)-5a

**tert-butyl (2*S*,4*E*,6*E*,9*R*)-2-((diphenylmethylene)amino)-9-hydroxy-9-phenylnona-4,6-dienoate ((2*S*,4*E*,6*E*,9*R*)-5a):** yield (95 mg, 99%); colorless oil;  $[\alpha]_D^{20} = -10.9$  (*c* 0.64, CH<sub>2</sub>Cl<sub>2</sub>); The product was analyzed by HPLC to determine the dr value and the enantiomeric excess: 16:1 dr, > 99% ee (Chiralpak AD-H, *i*-propanol/hexane = 10/90, flow rate 1.0 mL/min,  $\lambda = 254$  nm);  $t_r = 7.94, 8.54, 13.55$  and 21.26 min.

**HRMS (ESI+)** calcd. For C<sub>32</sub>H<sub>36</sub>NO<sub>3</sub> ([M+H]<sup>+</sup>): 482.2690, found: 482.2689.

#### HPLC chromatogram of compound (2*S*,4*E*,6*E*,9*R*)-5a

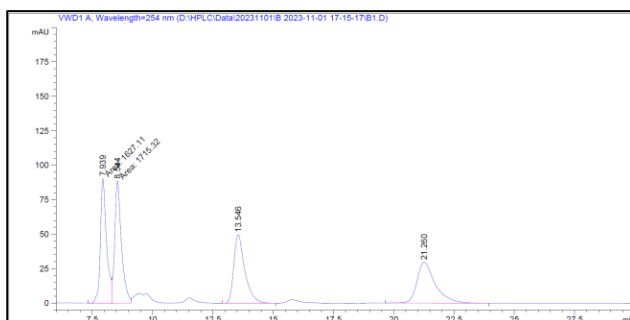

| Peak # | RetTime [min] | Type | Width [min] | Area [mAU*s] | Height [mAU] | Area %  |
|--------|---------------|------|-------------|--------------|--------------|---------|
| 1      | 7.939         | MF   | 0.2998      | 1627.10864   | 90.44197     | 25.0979 |
| 2      | 8.544         | FM   | 0.3227      | 1715.32166   | 88.60120     | 26.4586 |
| 3      | 13.546        | BB   | 0.4673      | 1576.58984   | 49.81060     | 24.3187 |
| 4      | 21.260        | BB   | 0.7761      | 1564.02295   | 29.66586     | 24.1248 |

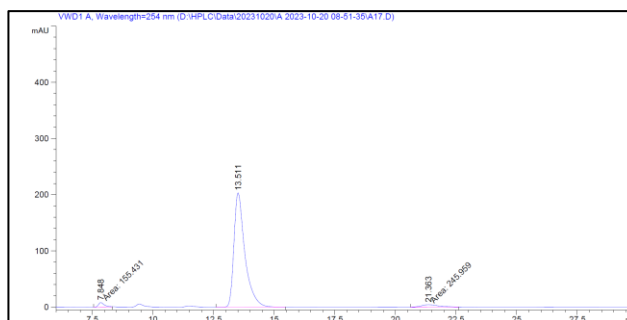

| Peak # | RetTime [min] | Type | Width [min] | Area [mAU*s] | Height [mAU] | Area %  |
|--------|---------------|------|-------------|--------------|--------------|---------|
| 1      | 7.848         | MM   | 0.3054      | 155.43135    | 8.48245      | 2.2926  |
| 2      | 13.511        | BB   | 0.4633      | 6378.26465   | 203.12837    | 94.0795 |
| 3      | 21.363        | MM   | 0.8900      | 245.95860    | 4.60619      | 3.6279  |

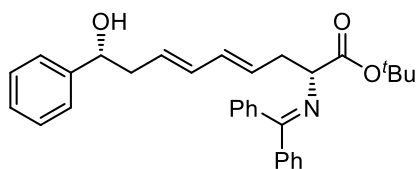

(2*R*,4*E*,6*E*,9*R*)-5a

**tert-butyl (2*R*,4*E*,6*E*,9*R*)-2-((diphenylmethylene)amino)-9-hydroxy-9-phenylnona-4,6-dienoate ((2*R*,4*E*,6*E*,9*R*)-5a):** yield (89 mg, 92%); colorless oil;  $[\alpha]_D^{20} = +54.4$  (*c* 0.66, CH<sub>2</sub>Cl<sub>2</sub>); The product was analyzed by HPLC to determine the dr value and the enantiomeric excess: 13:1 dr, > 99% ee (Chiralpak AD-H, *i*-propanol/hexane = 10/90, flow rate 1.0 mL/min,  $\lambda = 254$  nm);  $t_r = 7.94, 8.54,$

13.55 and 21.26 min.

<sup>1</sup>H NMR (400 MHz, Chloroform-*d*) δ 7.59 – 7.53 (m, 2H), 7.37 – 7.33 (m, 3H), 7.32 – 7.29 (m, 1H), 7.27 – 7.22 (m, 6H), 7.19 – 7.16 (m, 1H), 7.09 – 7.03 (m, 2H), 6.03 – 5.91 (m, 2H), 5.49 – 5.38 (m, 2H), 4.61 (dd, *J* = 7.6, 5.2 Hz, 1H), 3.92 (dd, *J* = 7.6, 5.2 Hz, 1H), 2.63 – 2.50 (m, 2H), 2.46 – 2.36 (m, 2H), 1.36 (s, 9H).

<sup>13</sup>C NMR (101 MHz, Chloroform-*d*) 170.8, 170.2, 143.8, 139.6, 136.6, 133.7, 132.5, 130.2, 129.1, 128.8, 128.5, 128.4, 128.0, 127.9, 127.7, 127.5, 125.7, 81.0, 73.6, 66.0, 42.6, 36.9, 28.0.

HRMS (ESI+) calcd. For C<sub>32</sub>H<sub>36</sub>NO<sub>3</sub> ([M+H]<sup>+</sup>): 482.2690, found: 482.2696.

### HPLC chromatogram of compound (2*R*,4*E*,6*E*,9*R*)-5a

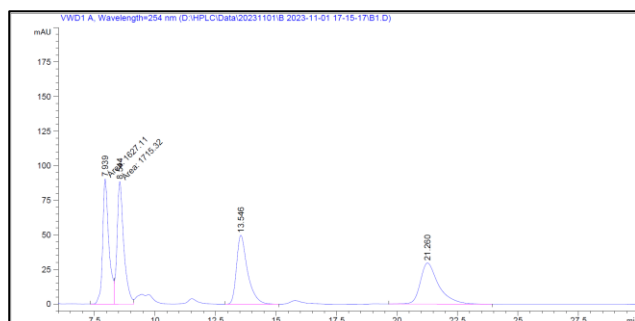

| Peak # | RetTime [min] | Type | Width [min] | Area [mAU*s] | Height [mAU] | Area %  |
|--------|---------------|------|-------------|--------------|--------------|---------|
| 1      | 7.939         | MF   | 0.2998      | 1627.10864   | 90.44197     | 25.0979 |
| 2      | 8.544         | FM   | 0.3227      | 1715.32166   | 88.60120     | 26.4586 |
| 3      | 13.546        | BB   | 0.4673      | 1576.58984   | 49.81060     | 24.3187 |
| 4      | 21.260        | BB   | 0.7761      | 1564.02295   | 29.66586     | 24.1248 |

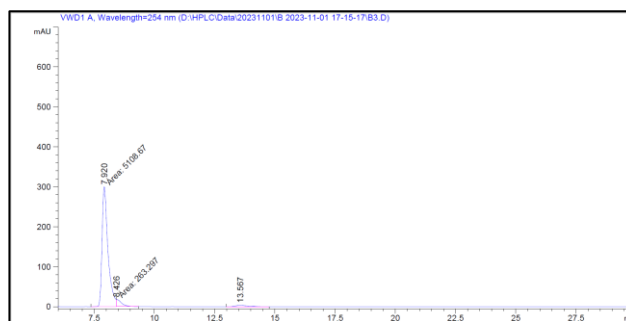

| Peak # | RetTime [min] | Type | Width [min] | Area [mAU*s] | Height [mAU] | Area %  |
|--------|---------------|------|-------------|--------------|--------------|---------|
| 1      | 7.920         | MF   | 0.2841      | 5108.66992   | 299.71225    | 93.0131 |
| 2      | 8.426         | FM   | 0.2460      | 263.29657    | 17.84160     | 4.7938  |
| 3      | 13.567        | BB   | 0.4561      | 120.45333    | 3.85956      | 2.1931  |

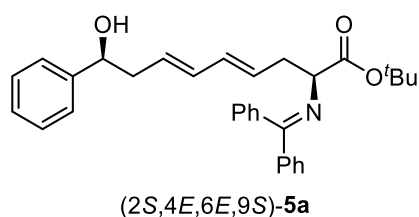

*tert*-butyl (2*S*,4*E*,6*E*,9*S*)-2-((diphenylmethylene)amino)-9-hydroxy-9-phenylnona-4,6-dienoate ((2*S*,4*E*,6*E*,9*S*)-5a): yield (89 mg, 92%); colorless oil; [ $\alpha$ ]<sub>D</sub><sup>20</sup> = -54.6 (*c* 0.45, CH<sub>2</sub>Cl<sub>2</sub>); The product was analyzed by HPLC to determine the dr value and the enantiomeric excess: 13:1 dr, 99% ee (Chiralpak AD-H, *i*-propanol/hexane = 10/90, flow rate 1.0 mL/min,  $\lambda$  = 254 nm);  $t_r$  = 7.94, 8.54, 13.55 and 21.26 min.

HRMS (ESI+) calcd. For C<sub>32</sub>H<sub>36</sub>NO<sub>3</sub> ([M+H]<sup>+</sup>): 482.2690, found: 482.2695.

## HPLC chromatogram of compound (2*S*,4*E*,6*E*,9*S*)-5a

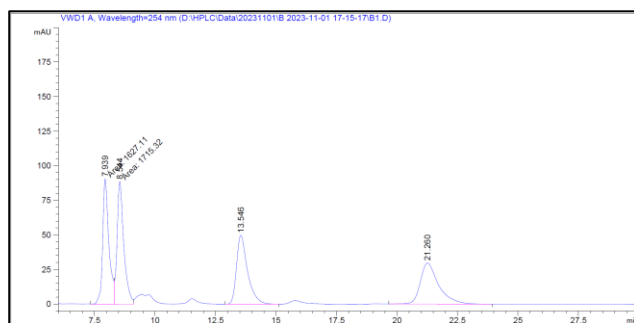

| Peak # | RetTime [min] | Type | Width [min] | Area [mAU*s] | Height [mAU] | Area %  |
|--------|---------------|------|-------------|--------------|--------------|---------|
| 1      | 7.939         | MF   | 0.2998      | 1627.10864   | 90.44197     | 25.0979 |
| 2      | 8.544         | FM   | 0.3227      | 1715.32166   | 88.60120     | 26.4586 |
| 3      | 13.546        | BB   | 0.4673      | 1576.58984   | 49.81060     | 24.3187 |
| 4      | 21.260        | BB   | 0.7761      | 1564.02295   | 29.66586     | 24.1248 |

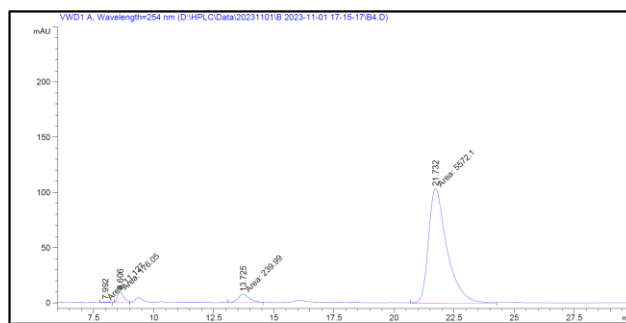

| Peak # | RetTime [min] | Type | Width [min] | Area [mAU*s] | Height [mAU] | Area %  |
|--------|---------------|------|-------------|--------------|--------------|---------|
| 1      | 7.992         | MF   | 0.2740      | 11.12695     | 6.76841e-1   | 0.1855  |
| 2      | 8.606         | MF   | 0.3069      | 176.05025    | 9.56122      | 2.9345  |
| 3      | 13.725        | MM   | 0.5199      | 239.99019    | 7.69322      | 4.0003  |
| 4      | 21.732        | MM   | 0.8925      | 5572.09619   | 104.05132    | 92.8797 |

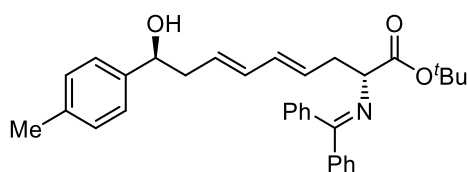

(2*R*,4*E*,6*E*,9*S*)-5b

**tert-butyl (2*R*,4*E*,6*E*,9*S*)-2-((diphenylmethylene)amino)-9-hydroxy-9-(*p*-tolyl)nona-4,6-dienoate ((2*R*,4*E*,6*E*,9*S*)-5b):** yield (92 mg, 93%); colorless oil;  $[\alpha]_D^{15} = +14.6$  ( $c$  0.52,  $\text{CH}_2\text{Cl}_2$ ); The product was analyzed by HPLC to determine the dr value and the enantiomeric excess: > 20:1 dr, > 99% ee (Chiralpak AD-H, *i*-propanol/hexane = 5/95, flow rate 1.0 mL/min,  $\lambda = 254$  nm);  $t_r = 11.32$ , 12.92, 20.27 and 32.18 min.

**$^1\text{H}$  NMR** (400 MHz, Chloroform-*d*)  $\delta$  7.68 – 7.59 (m, 2H), 7.44 – 7.29 (m, 6H), 7.23 – 7.18 (m, 2H), 7.16 – 7.07 (m, 4H), 6.10 – 5.97 (m, 2H), 5.57 – 5.43 (m, 2H), 4.69 – 4.61 (m, 1H), 3.98 (dd,  $J = 7.6$ , 5.2 Hz, 1H), 2.70 – 2.55 (m, 2H), 2.52 – 2.44 (m, 2H), 2.32 (s, 3H), 1.43 (s, 9H).

**$^{13}\text{C}$  NMR** (101 MHz, Chloroform-*d*)  $\delta$  170.8, 170.1, 140.9, 139.7, 137.1, 136.6, 133.6, 132.5, 130.2, 129.0, 128.8, 128.5, 128.4, 128.0, 127.92, 127.88, 125.7, 81.0 73.5, 66.0, 42.7, 36.9, 28.0, 21.1.

**HRMS** (ESI+) calcd. For  $\text{C}_{33}\text{H}_{38}\text{NO}_3$  ( $[\text{M}+\text{H}]^+$ ): 496.2846, found: 496.2843.

## HPLC chromatogram of compound (2*R*,4*E*,6*E*,9*S*)-5b

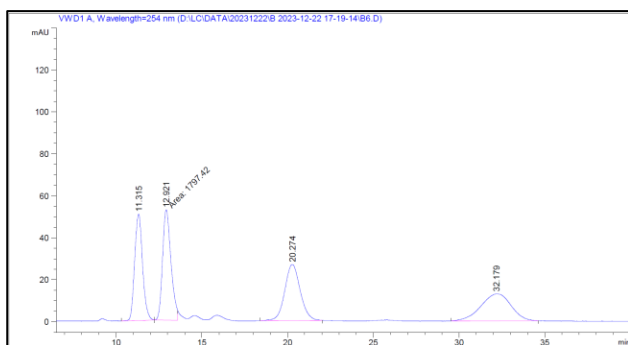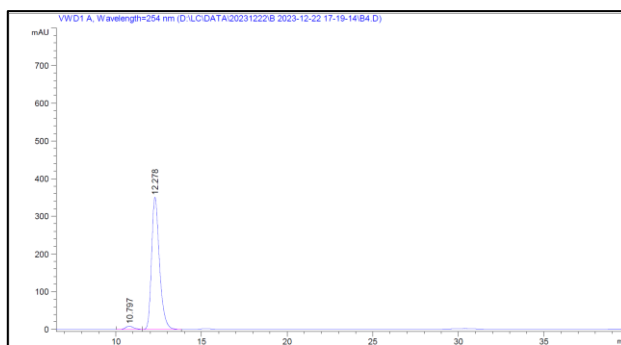

| Peak # | RetTime [min] | Type | Width [min] | Area [mAU*s] | Height [mAU] | Area %  |
|--------|---------------|------|-------------|--------------|--------------|---------|
| 1      | 11.315        | BB   | 0.5045      | 1623.52759   | 50.71288     | 24.3512 |
| 2      | 12.921        | MF   | 0.5698      | 1797.41577   | 52.57051     | 26.9594 |
| 3      | 20.274        | BV R | 0.8320      | 1676.85083   | 26.79663     | 25.1510 |
| 4      | 32.179        | BB   | 1.4294      | 1569.33191   | 12.90098     | 23.5384 |

| Peak # | RetTime [min] | Type | Width [min] | Area [mAU*s] | Height [mAU] | Area %  |
|--------|---------------|------|-------------|--------------|--------------|---------|
| 1      | 10.797        | VV R | 0.4894      | 272.22079    | 8.22655      | 2.3673  |
| 2      | 12.278        | VB   | 0.4874      | 1.12268e4    | 350.38440    | 97.6327 |

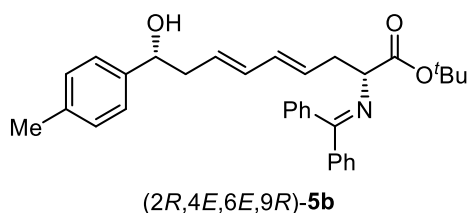

**tert-butyl (2*R*,4*E*,6*E*,9*R*)-2-((diphenylmethylene)amino)-9-hydroxy-9-(*p*-tolyl)nona-4,6-dienoate ((2*R*,4*E*,6*E*,9*R*)-5b):** yield (82 mg, 83%); colorless oil;  $[\alpha]_D^{15} = +63.7$  (*c* 0.52, CH<sub>2</sub>Cl<sub>2</sub>); The product was analyzed by HPLC to determine the dr value and the enantiomeric excess: > 20:1 dr, > 99% ee (Chiralpak AD-H, *i*-propanol/hexane = 5/95, flow rate 1.0 mL/min,  $\lambda = 254$  nm);  $t_r = 11.32, 12.92, 20.27$  and 32.18 min.

**<sup>1</sup>H NMR** (400 MHz, Chloroform-*d*)  $\delta$  7.66 – 7.61 (m, 2H), 7.43 – 7.30 (m, 6H), 7.23 – 7.19 (m, 2H), 7.16 – 7.10 (m, 4H), 6.10 – 5.98 (m, 2H), 5.56 – 5.46 (m, 2H), 4.66 (t, *J* = 6.4 Hz, 1H), 3.99 (dd, *J* = 7.6, 5.2 Hz, 1H), 2.70 – 2.57 (m, 2H), 2.53 – 2.44 (m, 2H), 2.33 (s, 3H), 1.43 (s, 9H).

**<sup>13</sup>C NMR** (101 MHz, Chloroform-*d*)  $\delta$  170.8, 170.1, 140.9, 139.6, 137.1, 136.6, 133.6, 132.5, 130.2, 129.03, 129.01, 128.8, 128.5, 128.4, 128.0, 127.89, 127.86, 125.7, 81.0, 73.5, 66.0, 42.6, 36.9, 28.0, 21.1.

**HRMS** (ESI+) calcd. For C<sub>33</sub>H<sub>38</sub>NO<sub>3</sub> ([M+H]<sup>+</sup>): 496.2846, found: 496.2845.

## HPLC chromatogram of compound (2R,4E,6E,9R)-5b

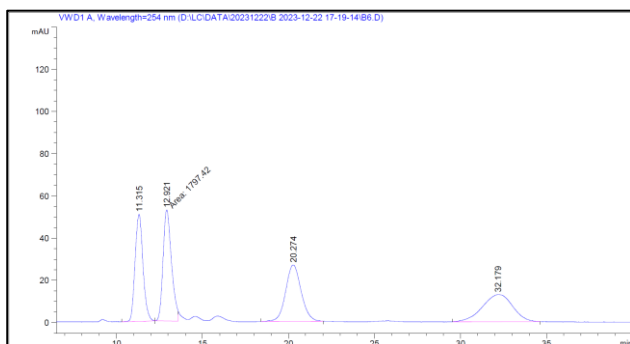

| Peak # | RetTime [min] | Type | Width [min] | Area [mAU*s] | Height [mAU] | Area %  |
|--------|---------------|------|-------------|--------------|--------------|---------|
| 1      | 11.315        | BB   | 0.5045      | 1623.52759   | 50.71288     | 24.3512 |
| 2      | 12.921        | MF   | 0.5698      | 1797.41577   | 52.57051     | 26.9594 |
| 3      | 20.274        | BV R | 0.8320      | 1676.85083   | 26.79663     | 25.1510 |
| 4      | 32.179        | BB   | 1.4294      | 1569.33191   | 12.90098     | 23.5384 |

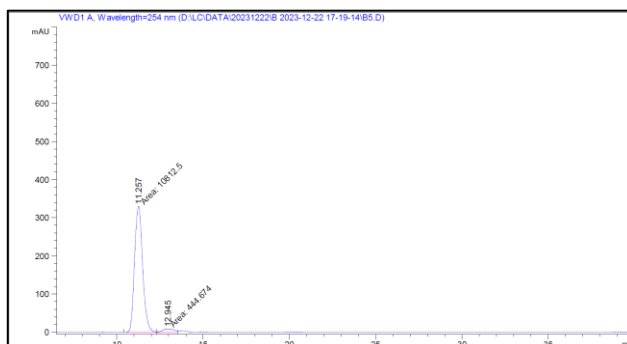

| Peak # | RetTime [min] | Type | Width [min] | Area [mAU*s] | Height [mAU] | Area %  |
|--------|---------------|------|-------------|--------------|--------------|---------|
| 1      | 11.257        | MF   | 0.5449      | 1.08125e4    | 330.74567    | 96.0499 |
| 2      | 12.945        | MF   | 0.7911      | 444.67429    | 9.36854      | 3.9501  |

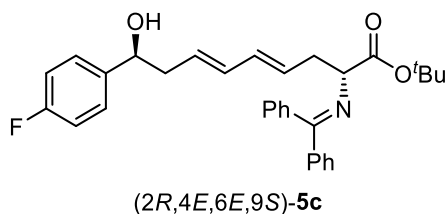

**tert-butyl (2R,4E,6E,9S)-2-((diphenylmethylene)amino)-9-(4-fluorophenyl)-9-hydroxynona-4,6-dienoate ((2R,4E,6E,9S)-5c):** yield (95 mg, 95%); colorless oil;  $[\alpha]_D^{15} = +18.1$  (*c* 0.50, CH<sub>2</sub>Cl<sub>2</sub>); The product was analyzed by HPLC to determine the dr value and the enantiomeric excess: 19:1 dr, > 99% ee (Chiralpak AD-H, *i*-propanol/hexane = 10/90, flow rate 1.0 mL/min,  $\lambda = 254$  nm);  $t_r = 7.63$ , 8.32, 12.19 and 18.41 min.

**<sup>1</sup>H NMR** (400 MHz, Chloroform-*d*)  $\delta$  7.65 – 7.60 (m, 2H), 7.44 – 7.26 (m, 8H), 7.15 – 7.09 (m, 2H), 7.02 – 6.95 (m, 2H), 6.09 – 5.97 (m, 2H), 5.55 – 5.43 (m, 2H), 4.67 (t, *J* = 6.4 Hz, 1H), 3.99 (dd, *J* = 7.6, 5.2 Hz, 1H), 2.69 – 2.56 (m, 2H), 2.50 – 2.41 (m, 2H), 1.43 (s, 9H).

**<sup>13</sup>C NMR** (101 MHz, Chloroform-*d*)  $\delta$  170.8, 170.2, 162.1 (d, *J* = 246.4 Hz), 139.7, 139.5 (d, *J* = 2.9 Hz), 136.6, 134.0, 132.4, 130.2, 129.4, 128.8, 128.5, 128.4, 128.0, 127.9, 127.4 (d, *J* = 8.1 Hz), 127.3, 115.1 (d, *J* = 21.2 Hz), 81.0, 72.9, 66.0, 42.8, 36.9, 28.0.

**<sup>19</sup>F NMR** (376 MHz, Chloroform-*d*)  $\delta$  -115.12 – -115.28 (m).

**HRMS** (ESI+) calcd. For C<sub>32</sub>H<sub>35</sub>FNO<sub>3</sub> ([M+H]<sup>+</sup>): 500.2595, found: 500.2602.

## HPLC chromatogram of compound (2*R*,4*E*,6*E*,9*S*)-5c

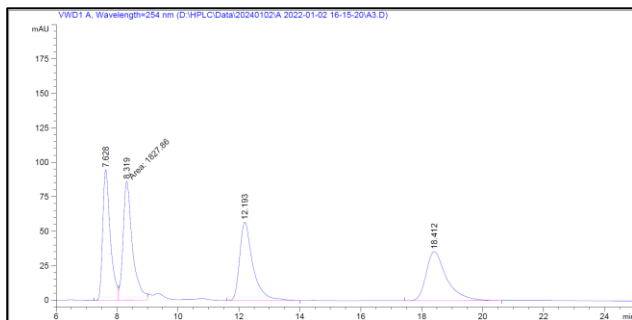

| Peak # | RetTime [min] | Type | Width [min] | Area [mAU*s] | Height [mAU] | Area %  |
|--------|---------------|------|-------------|--------------|--------------|---------|
| 1      | 7.628         | BV   | 0.2591      | 1649.11743   | 94.72486     | 24.1325 |
| 2      | 8.319         | MF   | 0.3529      | 1827.85608   | 86.33602     | 26.7481 |
| 3      | 12.193        | BB   | 0.4424      | 1708.19067   | 56.87701     | 24.9970 |
| 4      | 18.412        | BB   | 0.6866      | 1648.42371   | 35.57173     | 24.1224 |

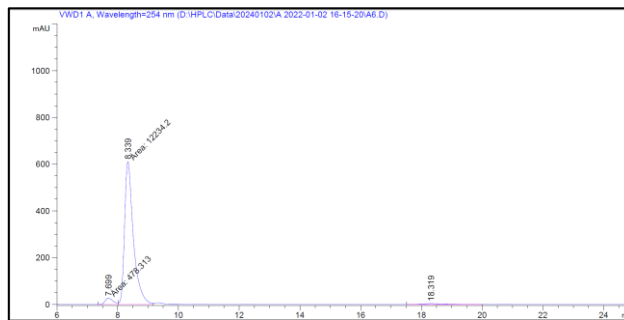

| Peak # | RetTime [min] | Type | Width [min] | Area [mAU*s] | Height [mAU] | Area %  |
|--------|---------------|------|-------------|--------------|--------------|---------|
| 1      | 7.699         | MF   | 0.3041      | 478.31308    | 26.21165     | 3.7144  |
| 2      | 8.339         | FM   | 0.3345      | 1.22342e4    | 609.56348    | 95.0071 |
| 3      | 18.319        | BB   | 0.6340      | 164.62610    | 3.65858      | 1.2784  |

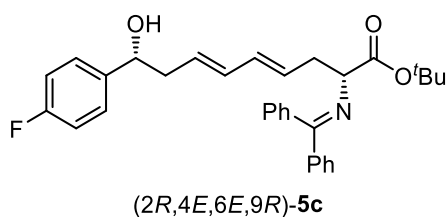

**tert-butyl (2*R*,4*E*,6*E*,9*R*)-2-((diphenylmethylene)amino)-9-(4-fluorophenyl)-9-hydroxynona-4,6-dienoate ((2*R*,4*E*,6*E*,9*R*)-5c):** yield (87 mg, 87%); colorless oil;  $[\alpha]_D^{15} = +60.4$  ( $c$  0.52, CH<sub>2</sub>Cl<sub>2</sub>); The product was analyzed by HPLC to determine the dr value and the enantiomeric excess: 13:1 dr, > 99% ee (Chiralpak AD-H, *i*-propanol/hexane = 10/90, flow rate 1.0 mL/min,  $\lambda = 254$  nm);  $t_r = 7.63$ , 8.32, 12.19 and 18.41 min.

**<sup>1</sup>H NMR** (400 MHz, Chloroform-*d*)  $\delta$  7.67 – 7.59 (m, 2H), 7.44 – 7.26 (m, 8H), 7.17 – 7.10 (m, 2H), 7.04 – 6.95 (m, 2H), 6.10 – 5.97 (m, 2H), 5.57 – 5.43 (m, 2H), 4.68 (dd,  $J = 7.4, 5.4$  Hz, 1H), 3.99 (dd,  $J = 7.6, 5.2$  Hz, 1H), 2.70 – 2.56 (m, 2H), 2.53 – 2.41 (m, 2H), 1.43 (s, 9H).

**<sup>13</sup>C NMR** (101 MHz, Chloroform-*d*)  $\delta$  170.8, 170.2, 162.1 (d,  $J = 245.9$  Hz), 139.6, 139.5 (d,  $J = 3.0$  Hz), 136.6, 134.0, 132.4, 130.2, 129.3, 128.8, 128.5, 128.4, 128.0, 127.9, 127.4 (d,  $J = 8.1$  Hz), 127.3, 115.1 (d,  $J = 21.4$  Hz), 81.0, 72.9, 66.0, 42.8, 36.9, 28.0.

**<sup>19</sup>F NMR** (376 MHz, Chloroform-*d*) -115.09 – -115.31 (m).

**HRMS** (ESI+) calcd. For C<sub>32</sub>H<sub>35</sub>FNO<sub>3</sub> ( $[M+H]^+$ ): 500.2595, found: 500.2600.

## HPLC chromatogram of compound (2*R*,4*E*,6*E*,9*R*)-5c

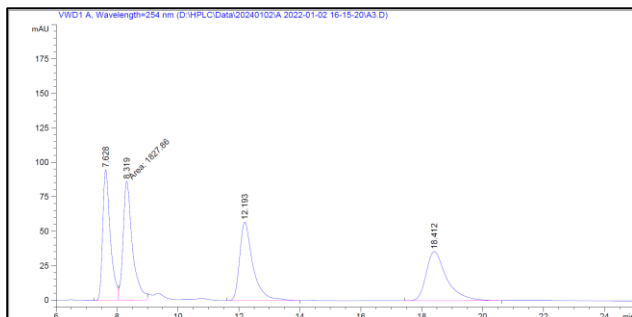

| Peak # | RetTime [min] | Type | Width [min] | Area [mAU*s] | Height [mAU] | Area %  |
|--------|---------------|------|-------------|--------------|--------------|---------|
| 1      | 7.628         | BV   | 0.2591      | 1649.11743   | 94.72486     | 24.1325 |
| 2      | 8.319         | MF   | 0.3529      | 1827.85608   | 86.33602     | 26.7481 |
| 3      | 12.193        | BB   | 0.4424      | 1708.19067   | 56.87701     | 24.9970 |
| 4      | 18.412        | BB   | 0.6866      | 1648.42371   | 35.57173     | 24.1224 |

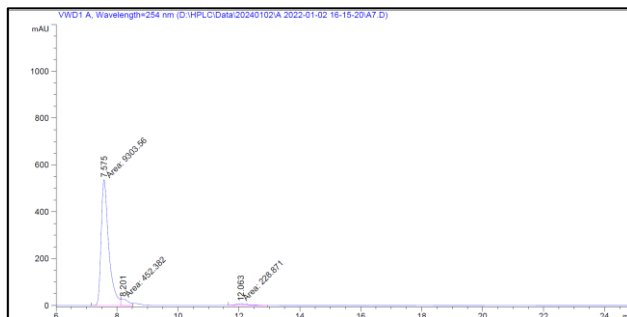

| Peak # | RetTime [min] | Type | Width [min] | Area [mAU*s] | Height [mAU] | Area %  |
|--------|---------------|------|-------------|--------------|--------------|---------|
| 1      | 7.575         | MF   | 0.2891      | 9303.55664   | 536.36804    | 93.1771 |
| 2      | 8.201         | FM   | 0.2732      | 452.38159    | 27.59366     | 4.5307  |
| 3      | 12.063        | MF   | 0.4924      | 228.87100    | 7.74632      | 2.2922  |

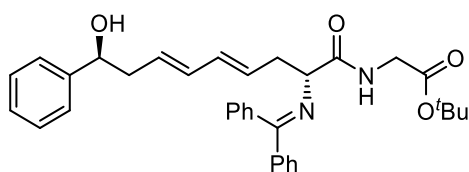

(2*R*,4*E*,6*E*,9*S*)-Gly-Gly-5d

**tert-butyl ((2*R*,4*E*,6*E*,9*S*)-2-((diphenylmethylene)amino)-9-hydroxy-9-phenylnona-4,6-dienoyl)glycinate ((2*R*,4*E*,6*E*,9*S*)-Gly-Gly-5d):** yield (89 mg, 83%); colorless oil;  $[\alpha]_D^{15} = -80.9$  ( $c$  0.53,  $\text{CH}_2\text{Cl}_2$ ); The product was analyzed by HPLC to determine the dr value and the enantiomeric excess: > 20:1 dr, > 99% ee (Chiralcel IC-AD-H, *i*-propanol/hexane = 20/80, flow rate 1.0 mL/min,  $\lambda = 254$  nm);  $t_r = 34.72, 38.71, 42.65$  and  $45.90$  min.

**$^1\text{H}$  NMR** (400 MHz, Chloroform-*d*)  $\delta$  7.68 – 7.63 (m, 2H), 7.46 – 7.39 (m, 5H), 7.38 – 7.35 (m, 2H), 7.32 – 7.27 (m, 4H), 7.25 – 7.20 (m, 1H), 7.08 – 7.02 (m, 2H), 6.07 – 5.91 (m, 2H), 5.53 – 5.35 (m, 2H), 4.71 – 4.64 (m, 1H), 4.09 (dd,  $J = 7.2, 4.8$  Hz, 1H), 4.01 (dd,  $J = 18.2, 5.4$  Hz, 1H), 3.94 (dd,  $J = 18.0, 5.2$  Hz, 1H), 2.58 – 2.44 (m, 4H), 1.47 (s, 9H).

**$^{13}\text{C}$  NMR** (101 MHz, Chloroform-*d*)  $\delta$  172.9, 169.9, 168.7, 143.8, 139.3, 135.7, 133.6, 132.7, 130.6, 128.8, 128.71, 128.65, 128.6, 128.3, 128.1, 127.9, 127.8, 127.5, 125.7, 82.0, 73.5, 65.7, 42.8, 41.7, 38.6, 28.0.

**HRMS** (ESI+) calcd. For  $\text{C}_{34}\text{H}_{39}\text{N}_2\text{O}_4$  ( $[\text{M}+\text{H}]^+$ ): 539.2904, found: 539.2909.



## HPLC chromatogram of compound (2*R*,4*E*,6*E*,9*S*)-Gly-Gly-5d

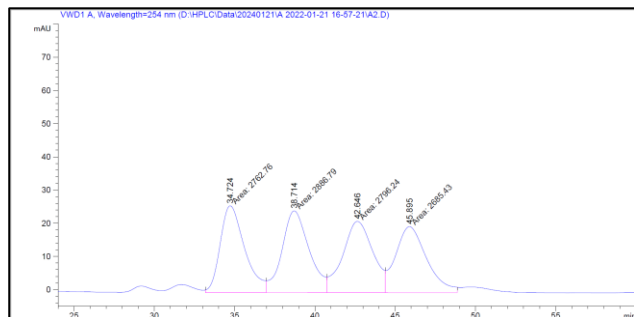

| Peak # | RetTime [min] | Type | Width [min] | Area [mAU*s] | Height [mAU] | Area %  |
|--------|---------------|------|-------------|--------------|--------------|---------|
| 1      | 34.724        | FM   | 1.7654      | 2762.76416   | 26.08285     | 24.8200 |
| 2      | 38.714        | FM   | 1.9561      | 2886.78638   | 24.59692     | 25.9341 |
| 3      | 42.646        | FM   | 2.1735      | 2796.24121   | 21.44174     | 25.1207 |
| 4      | 45.895        | FM   | 2.2513      | 2685.42798   | 19.88074     | 24.1252 |

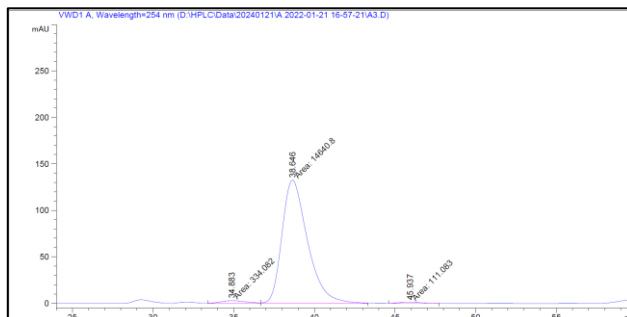

| Peak # | RetTime [min] | Type | Width [min] | Area [mAU*s] | Height [mAU] | Area %  |
|--------|---------------|------|-------------|--------------|--------------|---------|
| 1      | 34.883        | MF   | 1.8657      | 334.08203    | 2.98446      | 2.2145  |
| 2      | 38.646        | FM   | 1.8392      | 1.46408e4    | 132.67056    | 97.0492 |
| 3      | 45.937        | MM   | 1.8520      | 111.08257    | 9.99672e-1   | 0.7363  |

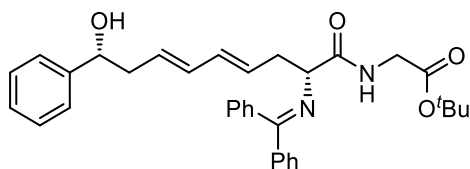

(2*R*,4*E*,6*E*,9*R*)-Gly-Gly-5d

**tert-butyl ((2*R*,4*E*,6*E*,9*R*)-2-((diphenylmethylene)amino)-9-hydroxy-9-phenylnona-4,6-dienoyl)glycinate ((2*R*,4*E*,6*E*,9*R*)-Gly-Gly-5d):** yield (88 mg, 82%); colorless oil;  $[\alpha]_D^{15} = -43.1$  ( $c$  0.50,  $\text{CH}_2\text{Cl}_2$ ); The product was analyzed by HPLC to determine the dr value and the enantiomeric excess: > 20:1 dr, > 99% ee (Chiralcel IC-AD-H, *i*-propanol/hexane = 20/80, flow rate 1.0 mL/min,  $\lambda = 254$  nm);  $t_r = 34.72, 38.71, 42.65$  and  $45.90$  min.

**$^1\text{H}$  NMR** (400 MHz, Chloroform-*d*)  $\delta$  7.68 – 7.63 (m, 2H), 7.46 – 7.38 (m, 5H), 7.38 – 7.35 (m, 2H), 7.33 – 7.28 (m, 4H), 7.26 – 7.20 (m, 1H), 7.10 – 7.04 (m, 2H), 6.10 – 5.91 (m, 2H), 5.55 – 5.37 (m, 2H), 4.73 – 4.65 (m, 1H), 4.09 (dd,  $J = 6.4, 5.2$  Hz, 1H), 4.02 (dd,  $J = 18.2, 5.4$  Hz, 1H), 3.94 (dd,  $J = 18.2, 5.4$  Hz, 1H), 2.58 – 2.41 (m, 4H), 1.47 (s, 9H).

**$^{13}\text{C}$  NMR** (101 MHz, Chloroform-*d*)  $\delta$  172.9, 169.8, 168.7, 143.8, 139.2, 135.7, 133.7, 132.7, 130.6, 128.8, 128.7, 128.6, 128.3, 128.2, 127.9, 127.8, 127.5, 125.7, 82.0, 73.6, 65.8, 42.7, 41.7, 38.6, 28.0.

**HRMS** (ESI+) calcd. For  $\text{C}_{34}\text{H}_{39}\text{N}_2\text{O}_4$  ( $[\text{M}+\text{H}]^+$ ): 539.2904, found: 539.2897.

## HPLC chromatogram of compound (2*R*,4*E*,6*E*,9*R*)-Gly-Gly-5d

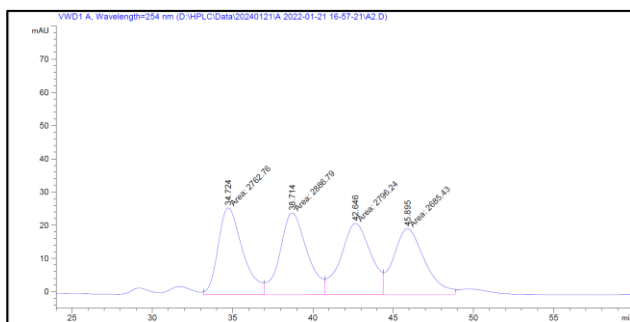

| Peak # | RetTime [min] | Type | Width [min] | Area [mAU*s] | Height [mAU] | Area %  |
|--------|---------------|------|-------------|--------------|--------------|---------|
| 1      | 34.724        | FM   | 1.7654      | 2762.76416   | 26.08285     | 24.8200 |
| 2      | 38.714        | FM   | 1.9561      | 2886.78638   | 24.59692     | 25.9341 |
| 3      | 42.646        | FM   | 2.1735      | 2796.24121   | 21.44174     | 25.1207 |
| 4      | 45.895        | FM   | 2.2513      | 2685.42798   | 19.88074     | 24.1252 |

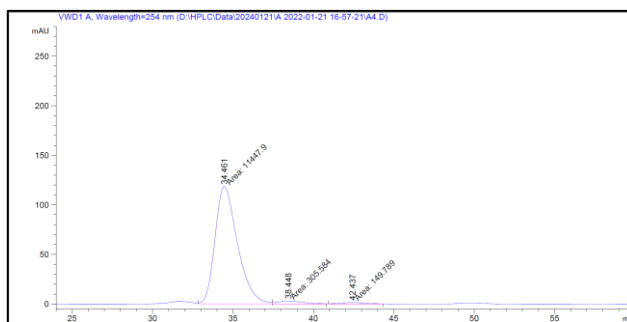

| Peak # | RetTime [min] | Type | Width [min] | Area [mAU*s] | Height [mAU] | Area %  |
|--------|---------------|------|-------------|--------------|--------------|---------|
| 1      | 34.461        | FM   | 1.6152      | 1.14479e4    | 118.12802    | 96.1744 |
| 2      | 38.448        | FM   | 1.8662      | 305.58432    | 2.72905      | 2.5672  |
| 3      | 42.437        | MM   | 1.8444      | 149.78949    | 1.35354      | 1.2584  |

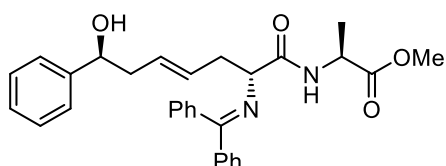

(2*R*,7*S*,*E*)-*L*-3v

**methyl ((2*R*,7*S*,*E*)-2-((diphenylmethylene)amino)-7-hydroxy-7-phenylhept-4-enoyl)-*L*-alaninate ((2*R*,7*S*,*E*)-*L*-3v):** yield (48 mg, 50%); colorless oil; > 20:1 dr;  $[\alpha]_D^{20} = -95.0$  (*c* 0.54, CH<sub>2</sub>Cl<sub>2</sub>).

**<sup>1</sup>H NMR** (400 MHz, Chloroform-*d*)  $\delta$  7.64 – 7.57 (m, 2H), 7.55 – 7.46 (m, 1H), 7.44 – 7.23 (m, 9H), 7.21 – 7.11 (m, 2H), 7.08 – 6.98 (m, 2H), 5.49 – 5.32 (m, 2H), 4.60 – 4.47 (m, 2H), 3.96 (t, *J* = 6.4 Hz, 1H), 3.71 (s, 3H), 2.51 – 2.29 (m, 3H), 2.24 – 2.14 (m, 1H), 1.38 (d, *J* = 7.2 Hz, 3H).

**<sup>13</sup>C NMR** (101 MHz, Chloroform-*d*)  $\delta$  173.4, 172.6, 169.2, 144.2, 139.0, 135.6, 130.7, 129.8, 129.5, 128.9, 128.8, 128.6, 128.25, 128.19, 127.5, 127.1, 125.6, 72.6, 65.6, 52.4, 47.6, 43.5, 39.1, 18.1.

**HRMS** (ESI+) calcd. For C<sub>30</sub>H<sub>33</sub>N<sub>2</sub>O<sub>4</sub> ([*M*+*H*]<sup>+</sup>): 485.2435, found: 485.2440.

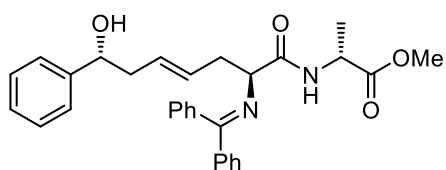

(2*S*,7*R*,*E*)-*D*-3v

**methyl ((2*S*,7*R*,*E*)-2-((diphenylmethylene)amino)-7-hydroxy-7-phenylhept-4-enoyl)-*D*-alaninate ((2*S*,7*R*,*E*)-*D*-3v):** yield (46 mg, 48%); colorless oil; > 20:1 dr;  $[\alpha]_D^{20} = 95.6$  (*c* 0.45, CH<sub>2</sub>Cl<sub>2</sub>).

**HRMS (ESI+)** calcd. For C<sub>30</sub>H<sub>33</sub>N<sub>2</sub>O<sub>4</sub> ([M+H]<sup>+</sup>): 485.2435, found: 485.2434.

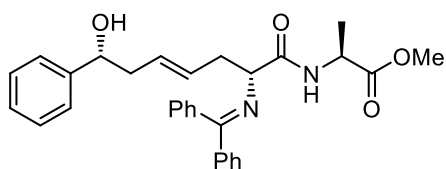

(2*R*,7*R*,*E*)-*L*-3v

**methyl ((2*R*,7*R*,*E*)-2-((diphenylmethylene)amino)-7-hydroxy-7-phenylhept-4-enoyl)-*L*-alaninate ((2*R*,7*R*,*E*)-*L*-3v):** yield (45 mg, 47%); colorless oil; > 20:1 dr;  $[\alpha]_D^{20} = -9.2$  (*c* 0.53, CH<sub>2</sub>Cl<sub>2</sub>).

**<sup>1</sup>H NMR** (400 MHz, Chloroform-*d*)  $\delta$  7.72 – 7.64 (m, 2H), 7.58 – 7.51 (m, 1H), 7.48 – 7.42 (m, 4H), 7.41 – 7.36 (m, 2H), 7.33 – 7.26 (m, 4H), 7.25 – 7.18 (m, 1H), 7.16 – 7.06 (m, 2H), 5.56 – 5.47 (m, 1H), 5.44 – 5.30 (m, 1H), 4.71 – 4.57 (m, 2H), 4.04 (t, *J* = 6.0 Hz, 1H), 3.77 (s, 3H), 2.54 – 2.33 (m, 4H), 1.45 (d, *J* = 7.2 Hz, 3H).

**<sup>13</sup>C NMR** (101 MHz, Chloroform-*d*)  $\delta$  173.4, 172.5, 169.4, 144.1, 139.0, 135.7, 130.7, 129.7, 128.85, 128.76, 128.7, 128.6, 128.3, 128.2, 127.5, 127.1, 125.6, 72.8, 65.6, 52.5, 47.7, 42.6, 38.7, 18.3.

**HRMS (ESI+)** calcd. For C<sub>30</sub>H<sub>33</sub>N<sub>2</sub>O<sub>4</sub> ([M+H]<sup>+</sup>): 485.2435, found: 485.2434.

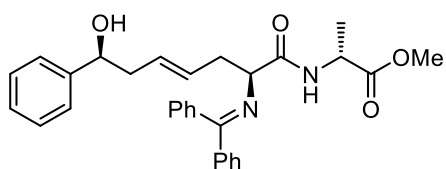

(2*S*,7*S*,*E*)-*D*-3v

**methyl ((2*S*,7*S*,*E*)-2-((diphenylmethylene)amino)-7-hydroxy-7-phenylhept-4-enoyl)-*D*-alaninate ((2*S*,7*S*,*E*)-*D*-3v):** yield (43 mg, 45%); colorless oil; > 20:1 dr;  $[\alpha]_D^{20} = +9.9$  (*c* 0.55, CH<sub>2</sub>Cl<sub>2</sub>).

**HRMS** (ESI+) calcd. For C<sub>30</sub>H<sub>33</sub>N<sub>2</sub>O<sub>4</sub> ([M+H]<sup>+</sup>): 485.2435, found: 485.2437.

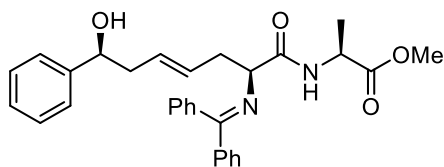

(2*S*,7*S*,*E*)-*L*-**3v**

**methyl ((2*S*,7*S*,*E*)-2-((diphenylmethylene)amino)-7-hydroxy-7-phenylhept-4-enoyl)-*L*-alaninate ((2*S*,7*S*,*E*)-*L*-**3v**):** yield (57 mg, 59%); colorless oil; 20:1 dr; [α]<sup>20</sup><sub>D</sub> = +13.9 (*c* 0.59, CH<sub>2</sub>Cl<sub>2</sub>).

<sup>1</sup>H NMR (400 MHz, Chloroform-*d*) δ 7.66 – 7.55 (m, 2H), 7.48 – 7.29 (m, 7H), 7.25 – 7.19 (m, 4H), 7.18 – 7.01 (m, 3H), 5.47 – 5.37 (m, 1H), 5.37 – 5.20 (m, 1H), 4.65 – 4.49 (m, 2H), 3.94 (t, *J* = 6.2 Hz, 1H), 3.67 (s, 3H), 2.46 – 2.25 (m, 4H), 1.38 (d, *J* = 7.2 Hz, 3H).

<sup>13</sup>C NMR (101 MHz, Chloroform-*d*) δ 173.3, 172.3, 170.0, 144.0, 139.1, 135.7, 130.7, 129.9, 128.9, 128.7, 128.6, 128.6, 128.2, 127.6, 127.2, 125.7, 72.8, 65.8, 52.4, 47.7, 42.4, 38.8, 18.6.

**HRMS** (ESI+) calcd. For C<sub>30</sub>H<sub>33</sub>N<sub>2</sub>O<sub>4</sub> ([M+H]<sup>+</sup>): 485.2435, found: 485.2440.

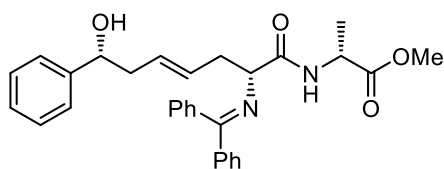

(2*R*,7*R*,*E*)-*D*-**3v**

**methyl ((2*R*,7*R*,*E*)-2-((diphenylmethylene)amino)-7-hydroxy-7-phenylhept-4-enoyl)-*D*-alaninate ((2*R*,7*R*,*E*)-*D*-**3v**):** yield (58 mg, 60%); colorless oil; 20:1 dr; [α]<sup>20</sup><sub>D</sub> = -14.2 (*c* 0.71, CH<sub>2</sub>Cl<sub>2</sub>).

**HRMS** (ESI+) calcd. For C<sub>30</sub>H<sub>33</sub>N<sub>2</sub>O<sub>4</sub> ([M+H]<sup>+</sup>): 485.2435, found: 485.2431.

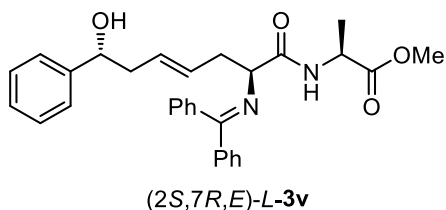

**methyl ((2*S*,7*R*,*E*)-2-((diphenylmethylene)amino)-7-hydroxy-7-phenylhept-4-enoyl)-*L*-alaninate ((2*S*,7*R*,*E*)-**L-3v**):** yield (52 mg, 54%); colorless oil; 20:1 dr;  $[\alpha]_D^{20} = +97.8$  (*c* 0.52, CH<sub>2</sub>Cl<sub>2</sub>).

**<sup>1</sup>H NMR** (400 MHz, Chloroform-*d*)  $\delta$  7.68 – 7.53 (m, 3H), 7.42 – 7.29 (m, 6H), 7.27 – 7.20 (m, 4H), 7.18 – 7.12 (m, 1H), 7.10 – 6.99 (m, 2H), 5.48 – 5.29 (m, 2H), 4.61 – 4.49 (m, 2H), 3.94 (t, *J* = 6.6 Hz, 1H), 3.68 (s, 3H), 2.46 – 2.31 (m, 3H), 2.26 – 2.17 (m, 1H), 1.41 (d, *J* = 7.2 Hz, 3H).

**<sup>13</sup>C NMR** (101 MHz, Chloroform-*d*)  $\delta$  173.2, 172.3, 169.8, 144.0, 139.1, 135.7, 130.7, 130.1, 129.2, 128.9, 128.7, 128.6, 128.2, 127.5, 127.2, 125.6, 72.6, 65.7, 52.4, 47.7, 43.4, 39.2, 18.7.

**HRMS** (ESI+) calcd. For C<sub>30</sub>H<sub>33</sub>N<sub>2</sub>O<sub>4</sub> ([M+H]<sup>+</sup>): 485.2435, found: 485.2441.

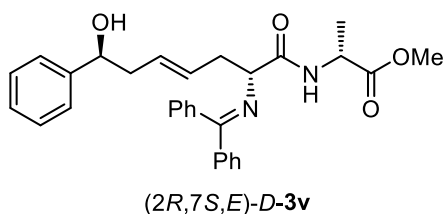

**methyl ((2*R*,7*S*,*E*)-2-((diphenylmethylene)amino)-7-hydroxy-7-phenylhept-4-enoyl)-*D*-alaninate ((2*R*,7*S*,*E*)-**D-3v**):** yield (55 mg, 57%); colorless oil; 20:1 dr;  $[\alpha]_D^{20} = -98.9$  (*c* 0.54, CH<sub>2</sub>Cl<sub>2</sub>).

**HRMS** (ESI+) calcd. For C<sub>30</sub>H<sub>33</sub>N<sub>2</sub>O<sub>4</sub> ([M+H]<sup>+</sup>): 485.2435, found: 485.2436.

## 6. Scale-up experiments and synthetic transformations

### Scheme S1. Scale-up experiments.

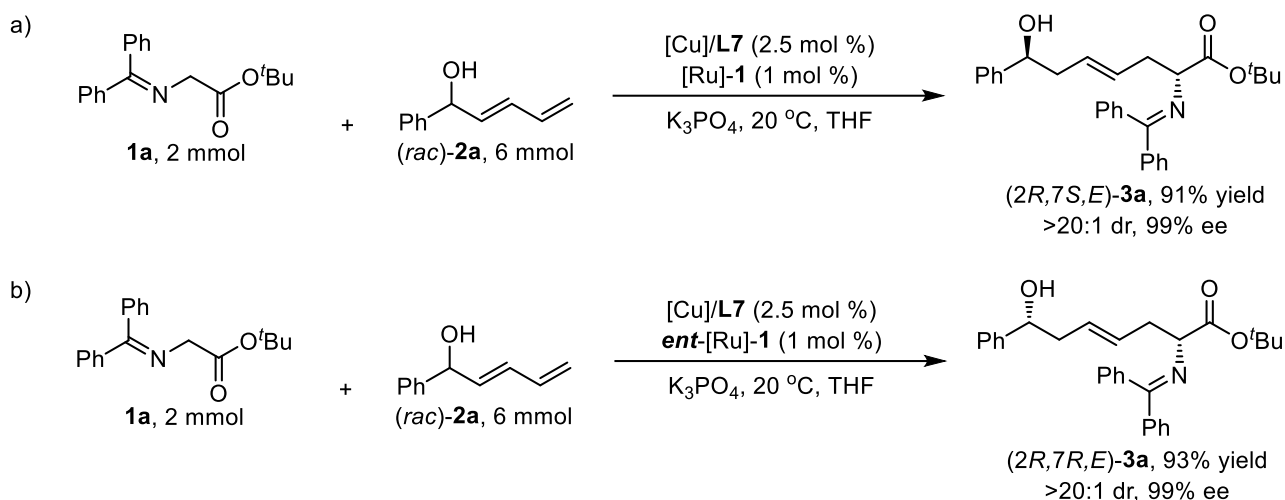

Under argon, to a flame dried Schlenk tube were added Cu(MeCN)<sub>4</sub>BF<sub>4</sub> (0.05 mmol) and L7 (0.055 mmol) and degassed THF (10 mL). The reaction mixture was stirred at 20 °C for 30 min. Then, [Ru]-1 or *ent*-[Ru]-1 complex (0.02 mmol), imino ester **1a** (2 mmol), dienyl carbinol **2a** (6 mmol), K<sub>3</sub>PO<sub>4</sub> (2 mmol) and THF (10 mL) were added into the Schlenk tube under argon. The reaction mixture was continuously stirred at 20 °C. Once starting material was consumed (monitored by TLC), the organic solvent was removed and the residue was purified by column chromatography to give the desired enolate products, which were then directly analyzed by chiral HPLC to determine the dr value and the enantiomeric excess.

### Scheme S2. Synthetic transformations.

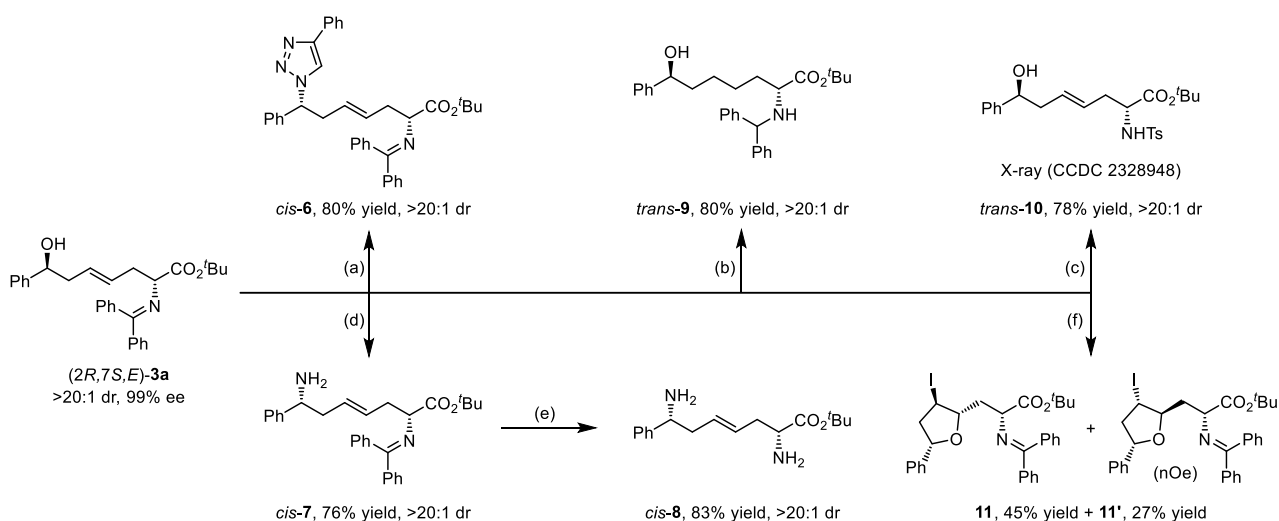

Reaction conditions: (a) i. DIAD, DPPA, PPh<sub>3</sub>, THF, ii. DIPEA, CuI, DMF, phenylacetylene; (b) Pd/C, H<sub>2</sub>, EtOAc; (c) i. 15% citric acid, THF, ii. TsCl, Et<sub>3</sub>N, DMAP; (d) i. DIAD, DPPA, PPh<sub>3</sub>, THF, ii. PPh<sub>3</sub>, THF, H<sub>2</sub>O; (e) 15% citric acid, THF, H<sub>2</sub>O; (f) I<sub>2</sub>, NaHCO<sub>3</sub>, MeCN, -20 °C.

(2*R*,7*S*,*E*)-**3a** (76 mg, 0.2 mmol) and PPh<sub>3</sub> (105 mg, 0.4 mmol) were dissolved in dry THF (5 mL) under an argon atmosphere, DIAD (81 mg, 0.4 mmol) was added dropwise under 0 °C and stirred for 10 min. Then DPPA (111 mg, 0.4 mmol) was added dropwise at the same time. The reaction mixture was stirred at room temperature for 16 h. Then the solution was concentrated under reduced pressure. The crude product was obtained by silica-gel column chromatography.

Another flame-dried Schlenk tube was cooled to room temperature and evacuated and backfilled with argon for three times. To this Schlenk tube were added the crude product (96 mg, 0.2 mmol), Phenylacetylene (27 mg, 0.26 mmol), CuI (3.8 mg, 0.02 mmol), DIPEA (52 mg, 0.4 mmol) and degassed DMF (2 mL). The mixture was stirred overnight at 30 °C. And then the mixture was concentrated in vacuo and purified by silica-gel column chromatography to give *cis*-**6** in 80% overall yield with > 20:1 dr.

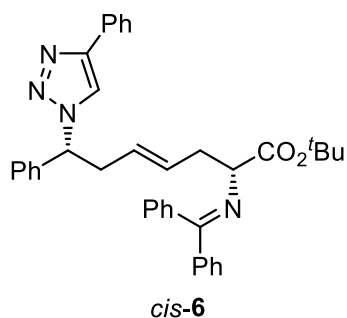

**tert-butyl (2*R*,7*R*,*E*)-2-((diphenylmethylene)amino)-7-phenyl-7-(4-phenyl-1*H*-1,2,3-triazol-1-yl)hept-4-enoate (*cis*-**6**):** yield (92 mg, 80%); sticky liquid; > 20:1 dr;  $[\alpha]_D^{20} = +38.7$  (*c* 0.72, CH<sub>2</sub>Cl<sub>2</sub>); The product was analyzed by HPLC to determine the enantiomeric excess: 99% ee (Chiralcel AD-H, *i*-propanol/hexane = 25/75, flow rate 1.0 mL/min,  $\lambda = 220$  nm);  $t_r = 7.89$  and 9.54 min.

**<sup>1</sup>H NMR** (400 MHz, Chloroform-*d*)  $\delta$  7.72 – 7.66 (m, 2H), 7.55 – 7.51 (m, 3H), 7.35 – 7.28 (m, 6H), 7.27 – 7.19 (m, 8H), 7.05 – 7.00 (m, 2H), 5.52 – 5.43 (m, 2H), 5.35 – 5.26 (m, 1H), 3.85 (dd, *J* = 7.0, 5.8 Hz, 1H), 3.21 – 3.08 (m, 1H), 2.98 – 2.83 (m, 1H), 2.51 – 2.38 (m, 2H), 1.32 (s, 9H).

**<sup>13</sup>C NMR** (101 MHz, Chloroform-*d*)  $\delta$  170.8, 170.2, 147.6, 139.5, 138.5, 136.5, 130.8, 130.6, 130.2, 129.0, 128.8, 128.7, 128.6, 128.4, 128.01, 127.99, 127.8, 127.1, 127.0, 125.7, 118.9, 81.0, 65.7, 65.3, 38.3, 36.8, 28.

**HRMS** (ESI+) calcd. For C<sub>38</sub>H<sub>39</sub>N<sub>4</sub>O<sub>2</sub> ([M+H]<sup>+</sup>): 583.7580, found: 583.7588.

**HPLC chromatogram of compound *cis*-**6****

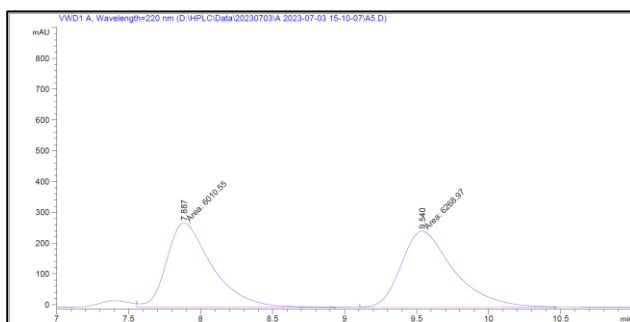

| Peak # | RetTime [min] | Type | Width [min] | Area [mAU*s] | Height [mAU] | Area %  |
|--------|---------------|------|-------------|--------------|--------------|---------|
| 1      | 7.887         | FM   | 0.3661      | 6010.55420   | 273.62256    | 48.9478 |
| 2      | 9.540         | MM   | 0.4234      | 6268.96875   | 246.75447    | 51.0522 |

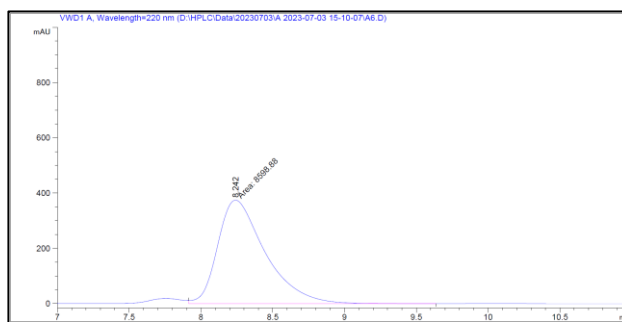

| Peak # | RetTime [min] | Type | Width [min] | Area [mAU*s] | Height [mAU] | Area %   |
|--------|---------------|------|-------------|--------------|--------------|----------|
| 1      | 8.242         | FM   | 0.3830      | 8598.88281   | 374.22989    | 100.0000 |

(*2R,7S,E*)-**3a** (76 mg, 0.2 mmol) and PPh<sub>3</sub> (105 mg, 0.4 mmol) were dissolved in dry THF (5 mL) under an argon atmosphere, DIAD (81 mg, 0.4 mmol) was added dropwise under 0 °C and stirred for 10 min. Then DPPA (111 mg, 0.4 mmol) was added dropwise at the same time. The reaction mixture was stirred at room temperature for 16 h. Then the solution was concentrated under reduced pressure. The crude product was obtained by silica-gel column chromatography.

A flame-dried Schlenk tube was cooled to room temperature and evacuated and backfilled with argon for three times. To this Schlenk tube were added the crude product (96 mg, 0.2 mmol), PPh<sub>3</sub> (105 mg, 0.4 mmol), H<sub>2</sub>O (0.2 mL) and THF (2 mL). The mixture was stirred overnight at 40 °C. And then the mixture was concentrated in vacuo and purified by silica-gel column chromatography to give *cis*-**7** in 76% overall yield with > 20:1 dr.

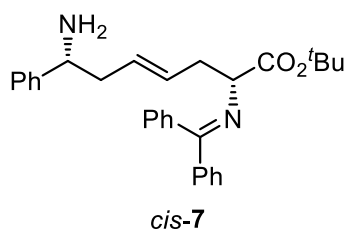

**tert-butyl (2*R*,7*R*,*E*)-7-amino-2-((diphenylmethylene)amino)-7-phenylhept-4-enoate (*cis*-**7**):** yield (68 mg, 76%); colorless oil; > 20:1 dr,  $[\alpha]_D^{20} = +74.0$  (c 0.27, CH<sub>2</sub>Cl<sub>2</sub>); The product was analyzed by HPLC to determine the enantiomeric excess: 99% ee (Chiralpak IC, *i*-propanol/hexane = 10/90, flow rate 1.0 mL/min,  $\lambda = 254$  nm);  $t_r = 15.50$  and 19.13 min.

<sup>1</sup>H NMR (400 MHz, Chloroform-*d*)  $\delta$  7.58 – 7.54 (m, 2H), 7.38 – 7.33 (m, 3H), 7.31 – 7.19 (m, 7H),



7.16 – 7.06 (m, 3H), 5.43 – 5.30 (m, 2H), 3.90 (dd,  $J = 7.6, 5.6$  Hz, 1H), 3.81 (dd,  $J = 8.2, 5.0$  Hz, 1H), 2.57 – 2.46 (m, 2H), 2.34 – 2.26 (m, 1H), 2.22 – 2.13 (m, 1H), 1.36 (s, 9H).

$^{13}\text{C}$  NMR (101 MHz, Chloroform- $d$ )  $\delta$  171.0, 170.1, 145.8, 139.6, 136.6, 130.2, 129.63, 129.56, 128.7, 128.5, 128.4, 128.3, 128.0, 127.8, 126.9, 126.3, 81.0, 66.0, 55.4, 43.0, 37.0, 28.0.

HRMS (ESI+) calcd. For  $\text{C}_{30}\text{H}_{35}\text{N}_2\text{O}_2$  ( $[\text{M}+\text{H}]^+$ ): 455.2693, found: 455.2695.

### HPLC chromatogram of compound *cis-7*

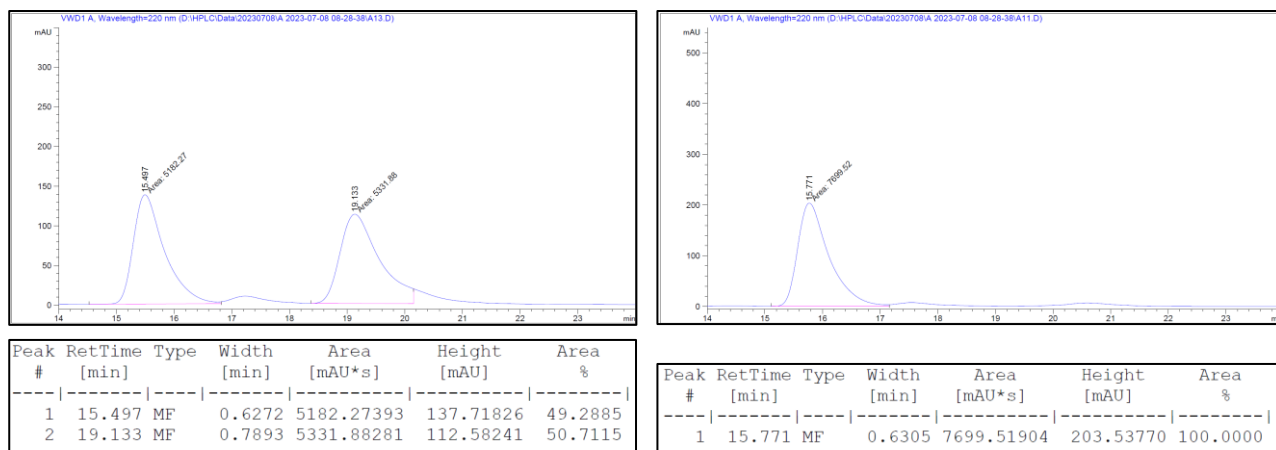

The compound *cis-7* was dissolved in THF (2 mL) and 15% citric acid (1 mL) was added. The tube was sealed, and the mixture was stirred for 2 h. The mixture was then neutralized by adding sat. aq.  $\text{NaHCO}_3$ . The resulting solution was extracted with EtOAc ( $3 \times 2$  mL). The organic phases were collected and dried over  $\text{Na}_2\text{SO}_4$ . After filtration, the solvent was removed under reduce pressure, and the crude product was purified by silica gel chromatography to give *cis-8* in 83% yield with  $> 20:1$  dr.

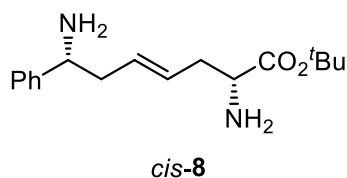

**tert-butyl (2*R*,7*R*,*E*)-2,7-diamino-7-phenylhept-4-enoate (*cis-8*):** yield (48 mg, 83%); colorless oil;  $> 20:1$  dr;  $[\alpha]_{\text{D}}^{20} = +64.2$  ( $c$  0.27,  $\text{CH}_2\text{Cl}_2$ ).

$^1\text{H}$  NMR (400 MHz, Chloroform- $d$ )  $\delta$  7.38 – 7.21 (m, 5H), 5.56 – 5.42 (m, 2H), 4.08 (dd,  $J = 9.0, 5.0$  Hz, 1H), 3.36 (dd,  $J = 8.2, 5.0$  Hz, 1H), 2.56 – 2.40 (m, 3H), 2.31 – 2.23 (m, 1H), 1.37 (s, 9H).

$^{13}\text{C}$  NMR (101 MHz, Chloroform- $d$ )  $\delta$  173.0, 141.3, 130.1, 129.4, 128.8, 127.9, 126.7, 81.8, 55.3,

53.7, 40.7, 36.9, 28.0.

**HRMS** (ESI+) calcd. For C<sub>17</sub>H<sub>27</sub>N<sub>2</sub>O<sub>2</sub> ([M+H]<sup>+</sup>): 291.2067, found: 291.2061.

A flame-dried Schlenk tube was cooled to room temperature and evacuated and backfilled with hydrogen for three times. To this Schlenk tube were added (2*R*,7*S*,*E*)-**3a** (91 mg, 0.2 mmol), Pd/C (3 mg, 10 wt%), EtOAc (2 mL) and the reaction mixture was stirred under 1 atm hydrogen gas pressure at room temperature overnight. Then the resulting mixture was concentrated and purified by flash column chromatography to afford the desired product *trans*-**9** in 80% overall yield with > 20:1 dr.

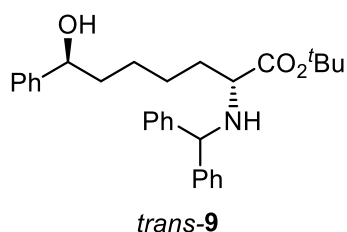

**tert-butyl (2*R*,7*S*)-2-(benzhydrylamino)-7-hydroxy-7-phenylheptanoate (*trans*-**9**):** yield (74 mg, 80%); colorless oil; > 20:1 dr; [ $\alpha$ ]<sub>D</sub><sup>20</sup> = -0.9 (*c* 0.45, CH<sub>2</sub>Cl<sub>2</sub>).

**<sup>1</sup>H NMR** (400 MHz, Chloroform-*d*)  $\delta$  7.36 – 7.33 (m, 2H), 7.30 – 7.25 (m, 4H), 7.25 – 7.07 (m, 9H), 4.70 (s, 1H), 4.56 (dd, *J* = 7.4, 5.8 Hz, 1H), 2.95 (dd, *J* = 7.4, 5.8 Hz, 1H), 1.86 – 1.58 (m, 5H), 1.54 – 1.45 (m, 2H), 1.39 (s, 9H), 1.34 – 1.28 (m, 2H).

**<sup>13</sup>C NMR** (101 MHz, Chloroform-*d*)  $\delta$  175.1, 144.8, 144.5, 142.9, 128.5, 128.44, 128.39, 127.7, 127.5, 127.3, 127.1, 125.8, 80.9, 74.5, 65.5, 59.7, 38.9, 33.7, 28.2, 25.7, 25.6.

**HRMS** (ESI+) calcd. For C<sub>30</sub>H<sub>38</sub>NO<sub>3</sub> ([M+H]<sup>+</sup>): 460.2846, found: 460.2842.

To a solution of (2*R*,7*S*,*E*)-**3a** (0.2 mmol) in THF (0.1 mL) was added 15% citric acid (1 mL). The mixture was stirred at room temperature for 1 h, quenched with sat. aq. NaHCO<sub>3</sub> and extracted with EtOAc (3 × 2 mL). The organic layers were combined and dried over Na<sub>2</sub>SO<sub>4</sub>. The solvent was removed and the crude product amine was obtained. To a solution of crude product in DCM (2 mL) was added triethylamine (61 mg, 0.6 mmol) and TsCl (114 mg, 0.6 mmol) followed by DMAP (7.5 mg, 0.06 mmol). The mixture was stirred overnight and then the resulting mixture was concentrated and purified by flash column chromatography to afford the desired product *trans*-**10** in 78% overall

yield with > 20:1 dr.

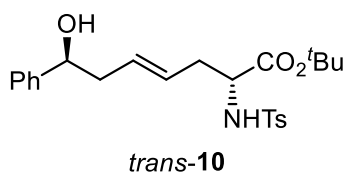

**tert-butyl (2*R*,7*S*,*E*)-7-hydroxy-2-((4-methylphenyl)sulfonamido)-7-phenylhept-4-enoate**

**(*trans*-**10**):** yield (63 mg, 78%); white solid; m.p. 88-90 °C; > 20:1 dr;  $[\alpha]_D^{10} = -53.9$  (*c* 0.53, CH<sub>2</sub>Cl<sub>2</sub>).

**<sup>1</sup>H NMR** (400 MHz, Chloroform-*d*)  $\delta$  7.64 (d, *J* = 8.0 Hz, 2H), 7.35 – 7.28 (m, 3H), 7.25 – 7.14 (m, 4H), 5.48 – 5.31 (m, 2H), 5.19 (d, *J* = 9.2 Hz, 1H), 4.63 (dd, *J* = 8.0, 4.8 Hz, 1H), 3.83 – 3.74 (m, 1H), 2.41 – 2.33 (m, 3H), 2.32 (s, 3H), 2.31 – 2.25 (m, 1H), 1.19 (s, 9H).

**<sup>13</sup>C NMR** (101 MHz, Chloroform-*d*)  $\delta$  170.0, 143.9, 143.5, 137.0, 131.3, 129.6, 128.4, 127.5, 127.3, 127.0, 125.7, 82.6, 73.2, 55.8, 42.5, 36.7, 27.7, 21.4.

**HRMS** (ESI+) calcd. For C<sub>24</sub>H<sub>32</sub>NO<sub>5</sub>S ([*M*+*H*]<sup>+</sup>): 446.1996, found: 446.1990.

To a solution of (*2R,7R,E*)-**3a** (0.2 mmol) in THF (0.1 mL) was added 15% citric acid (1 mL). The mixture was stirred at room temperature for 1 h, quenched with sat. aq. NaHCO<sub>3</sub> and extracted with EtOAc (3 × 2 mL). The organic layers were combined and dried over Na<sub>2</sub>SO<sub>4</sub>. The solvent was removed and the crude product amine was obtained. To a solution of crude product in DCM (2 mL) was added triethylamine (61 mg, 0.6 mmol) and TsCl (114 mg, 0.6 mmol) followed by DMAP (7.5 mg, 0.06 mmol). The mixture was stirred overnight and then the resulting mixture was concentrated and purified by flash column chromatography to afford the desired product *cis*-**10** in 77% overall yield with > 20:1 dr.

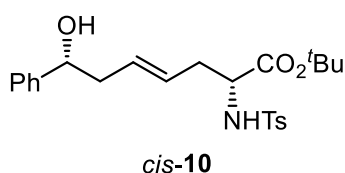

**tert-butyl (2*R*,7*R*,*E*)-7-hydroxy-2-((4-methylphenyl)sulfonamido)-7-phenylhept-4-enoate (*cis*-**

****10**):** yield (62 mg, 77%); white solid; m.p. 100-102 °C; > 20:1 dr;  $[\alpha]_D^{10} = +17.8$  (*c* 0.47, CH<sub>2</sub>Cl<sub>2</sub>).

**<sup>1</sup>H NMR** (400 MHz, Chloroform-*d*)  $\delta$  7.64 (d, *J* = 8.4 Hz, 2H), 7.30 – 7.27 (m, 4H), 7.23 – 7.19 (m,

3H), 5.48 – 5.31 (m, 2H), 5.09 (d,  $J = 9.2$  Hz, 1H), 4.61 (dd,  $J = 8.4, 4.8$  Hz, 1H), 3.82 – 3.75 (m, 1H), 2.44 – 2.33 (m, 3H), 2.32 (s, 3H), 2.31 – 2.26 (m, 1H), 1.18 (s, 9H).

$^{13}\text{C}$  NMR (101 MHz, Chloroform- $d$ )  $\delta$  170.1, 143.8, 143.5, 136.9, 131.3, 129.6, 128.4, 127.5, 127.3, 127.1, 125.7, 82.6, 73.0, 55.8, 42.8, 36.7, 27.7, 21.4.

HRMS (ESI+) calcd. For  $\text{C}_{24}\text{H}_{32}\text{NO}_5\text{S}$  ( $[\text{M}+\text{H}]^+$ ): 446.1996, found: 446.1997.

To a solution of (2*R*,7*S*,*E*)-**3a** (137 mg, 0.3 mmol) and  $\text{NaHCO}_3$  (51 mg, 0.6 mmol) in MeCN (3 mL) was added  $\text{I}_2$  (229 mg, 0.9 mmol) at  $-20$  °C. The mixture was stirred for 12 h before quenched by addition of sat. aq.  $\text{Na}_2\text{SO}_3$ . The aqueous layer was extracted with EtOAc ( $3 \times 5$  mL). The combined organic layers were concentrated, and purified using flash chromatography to give the desired product **11** in 45% yield with  $> 20:1$  dr and **11'** in 27% yield with  $> 20:1$  dr.

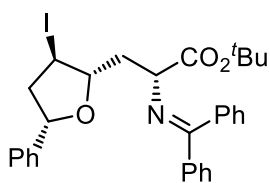

*tert*-butyl (*R*)-2-((diphenylmethylene)amino)-3-((2*S*,3*R*,5*S*)-3-iodo-5-phenyltetrahydrofuran-2-yl)propanoate (**11**): yield (79 mg, 45%); white solid; m.p. 140-142 °C;  $> 20:1$  dr;  $[\alpha]^{15}_{\text{D}} = -18.0$  ( $c$  0.56,  $\text{CH}_2\text{Cl}_2$ ).

$^1\text{H}$  NMR (400 MHz, Chloroform- $d$ )  $\delta$  7.91 (d,  $J = 7.6$  Hz, 2H), 7.41 – 7.27 (m, 10H), 7.18 – 7.11 (m, 3H), 5.07 (dd,  $J = 12.6, 2.6$  Hz, 1H), 4.30 – 4.23 (m, 2H), 3.98 (dd,  $J = 9.0, 6.6$  Hz, 1H), 2.92 – 2.83 (m, 1H), 2.41 – 2.30 (m, 1H), 1.89 – 1.78 (m, 1H), 1.71 – 1.64 (m, 1H), 1.20 (s, 9H).

$^{13}\text{C}$  NMR (101 MHz, Chloroform- $d$ )  $\delta$  172.7, 147.6, 142.4, 142.0, 129.0, 128.4, 128.2, 128.0, 127.6, 127.5, 127.3, 126.6, 92.1, 80.6, 71.6, 65.8, 63.2, 42.9, 32.1, 27.8, 23.9.

HRMS (ESI+) calcd. For  $\text{C}_{30}\text{H}_{33}\text{INO}_3$  ( $[\text{M}+\text{H}]^+$ ): 582.1500, found: 582.1492.

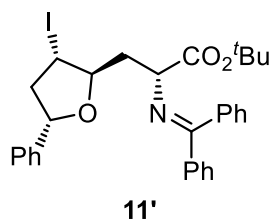

***tert*-butyl (*R*)-2-((diphenylmethylene)amino)-3-((2*R*,3*S*,5*S*)-3-iodo-5-phenyltetrahydrofuran-2-yl)propanoate (**11'**):** yield (47 mg, 27%); white solid; m.p. 68-70 °C; > 20:1 dr;  $[\alpha]_D^{20} = +132.9$  (*c* 0.44, CH<sub>2</sub>Cl<sub>2</sub>).

**<sup>1</sup>H NMR** (400 MHz, Chloroform-*d*)  $\delta$  7.55 – 7.45 (m, 4H), 7.44 – 7.26 (m, 8H), 7.24 – 7.16 (m, 3H), 4.60 (dd, *J* = 11.6, 2.4 Hz, 1H), 4.14 – 4.06 (m, 1H), 3.93 (d, *J* = 8.8 Hz, 1H), 3.90 – 3.84 (m, 1H), 2.72 – 2.62 (m, 1H), 2.40 – 2.32 (m, 1H), 2.14 – 2.07 (m, 1H), 1.96 – 1.86 (m, 1H), 1.19 (s, 9H).

**<sup>13</sup>C NMR** (101 MHz, Chloroform-*d*)  $\delta$  173.7, 143.0, 142.8, 142.1, 128.3, 128.2, 127.8, 127.7, 127.6, 127.4, 126.1, 92.5, 80.3, 72.7, 65.4, 62.6, 42.3, 37.7, 27.7, 23.2.

**HRMS** (ESI+) calcd. For C<sub>30</sub>H<sub>33</sub>INO<sub>3</sub> ([M+H]<sup>+</sup>): 582.1500, found: 582.1502.

## 7. Kinetic resolution studies

### Scheme S3. Kinetic resolution studies.

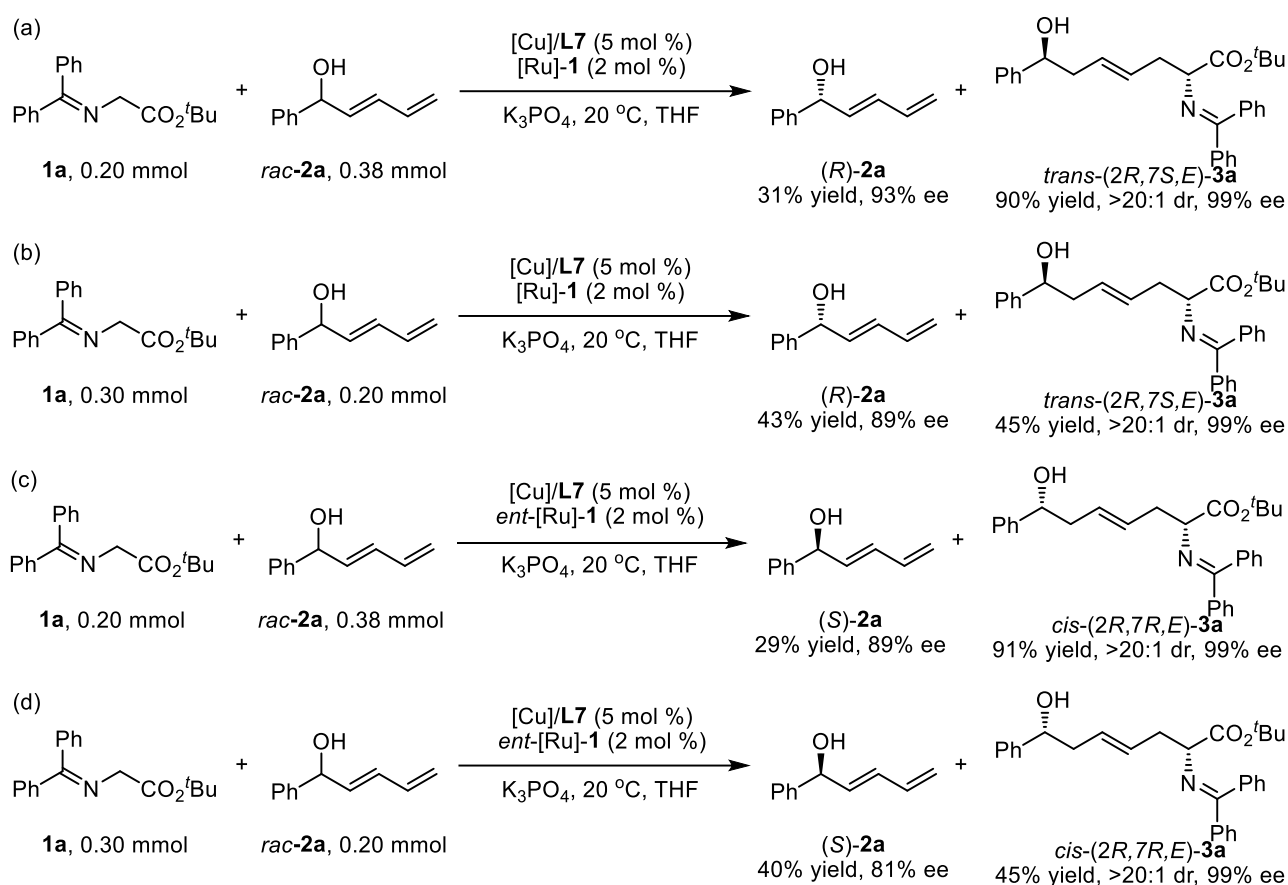

Under argon, to a flame dried Schlenk tube were added  $\text{Cu}(\text{MeCN})_4\text{BF}_4$  (0.01 mmol) and **L7** (0.01 mmol) and degassed THF (1 mL). The reaction mixture was stirred at 20 °C for about 30 min. Then,  $[\text{Ru}]\text{-1}$  (0.004 mmol), imino ester **1a** (0.2 mmol), dienyl carbinol **2a** (0.38 mmol),  $\text{K}_3\text{PO}_4$  (0.2 mmol) and THF (1 mL) were added into the Schlenk tube under argon. The reaction mixture was continuously stirred at 20 °C. Once starting material was consumed (monitored by TLC), the organic solvent was removed by rotary evaporation. The whole residue was further purified by column chromatography to give the desired product **3a**, which was analyzed by HPLC to determine the dr value and enantiomeric excess. The recovered **2a** was analyzed by HPLC to determine the enantiomeric excess. We can get the *trans*-(**2R,7S,E**)-**3a** in 90% yield (> 20:1 dr, 99% ee) and (**R**)-**2a** in 31% yield (93% ee) (Scheme S3a). By the same operation, but using 0.2 mmol **2a** and 0.3 mmol **1a**, we can only get the *trans*-(**2R,7S,E**)-**3a** in 45% yield with > 20:1 dr and 99% ee, and (**R**)-**2a** in 43% yield with 89% ee (Scheme S3b). By the same operation, but using *ent*- $[\text{Ru}]\text{-1}$  instead of  $[\text{Ru}]\text{-1}$

**1**, we can get the *cis*-(2*R*,7*R*,*E*)-**3a** in 91% yield with > 20:1 dr and 99% ee, and (*S*)-**2a** in 29% yield with 89% ee (Scheme S3c). When we use 0.20 mmol **2a** and 0.30 mmol **1a** with *ent*-[Ru]-**1**, the *cis*-(2*R*,7*R*,*E*)-**3a** in 45% yield with > 20:1 dr and 99% ee, and (*S*)-**2a** in 40% yield with 81% ee will be obtained. Thus, the bimetallic copper/ruthenium relay catalysis undergoes kinetic resolution process.

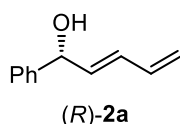

**(*R*,*E*)-1-phenylpenta-2,4-dien-1-ol ((*R*)-**2a**):** yield (30 mg, 31%); colorless oil;  $[\alpha]_D^{20} = -35.8$  (*c* 0.51, CH<sub>2</sub>Cl<sub>2</sub>); The product was analyzed by HPLC to determine the enantiomeric excess: 93% ee (Chiralpak OD-H, *i*-propanol/hexane = 3/97, flow rate 1 mL/min,  $\lambda = 254$  nm);  $t_r = 19.65$  and 24.02 min.

#### HPLC chromatogram of compound (*R*)-**2a**

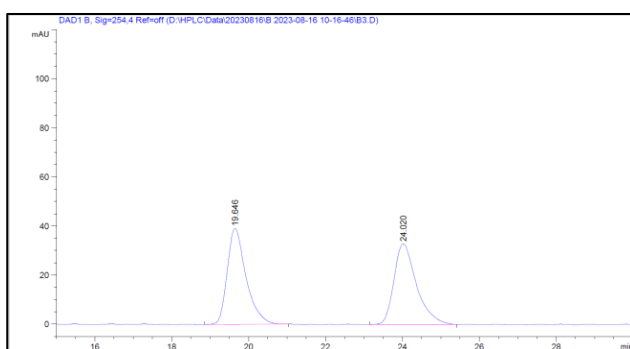

| Peak # | RetTime [min] | Type | Width [min] | Area [mAU*s] | Height [mAU] | Area %  |
|--------|---------------|------|-------------|--------------|--------------|---------|
| 1      | 19.646        | BB   | 0.5101      | 1328.04858   | 39.12090     | 49.8424 |
| 2      | 24.020        | BB   | 0.6084      | 1336.44556   | 32.86478     | 50.1576 |

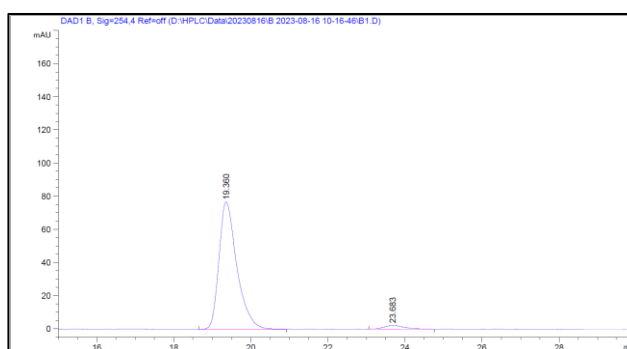

| Peak # | RetTime [min] | Type | Width [min] | Area [mAU*s] | Height [mAU] | Area %  |
|--------|---------------|------|-------------|--------------|--------------|---------|
| 1      | 19.360        | BB   | 0.4830      | 2467.29248   | 76.75365     | 96.7882 |
| 2      | 23.683        | BB   | 0.4526      | 81.87313     | 2.22864      | 3.2118  |

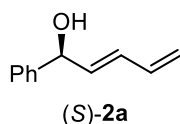

**(*S*,*E*)-1-phenylpenta-2,4-dien-1-ol ((*S*)-**2a**):** yield (28 mg, 29%); colorless oil;  $[\alpha]_D^{20} = +31.1$  (*c* 0.67, CH<sub>2</sub>Cl<sub>2</sub>); The product was analyzed by HPLC to determine the enantiomeric excess: 89% ee (Chiralpak OD-H, *i*-propanol/hexane = 3/97, flow rate 1 mL/min,  $\lambda = 254$  nm);  $t_r = 19.65$  and 24.02 min.

# HPLC chromatogram of compound (S)-2a

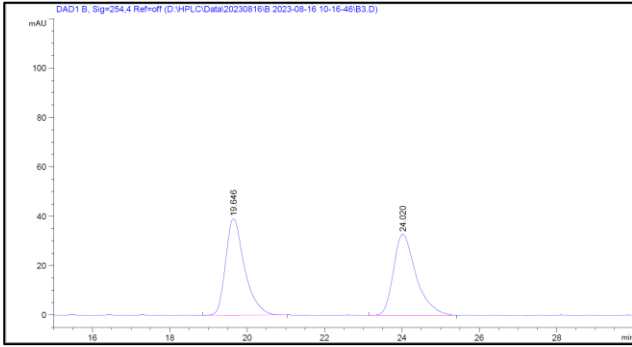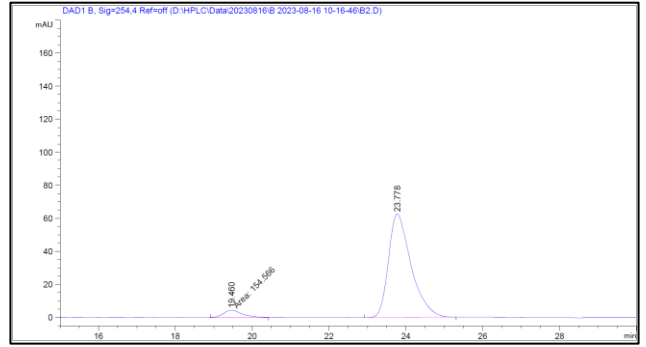

| Peak # | RetTime [min] | Type | Width [min] | Area [mAU*s] | Height [mAU] | Area %  |
|--------|---------------|------|-------------|--------------|--------------|---------|
| 1      | 19.646        | BB   | 0.5101      | 1328.04858   | 39.12090     | 49.8424 |
| 2      | 24.020        | BB   | 0.6084      | 1336.44556   | 32.86478     | 50.1576 |

| Peak # | RetTime [min] | Type | Width [min] | Area [mAU*s] | Height [mAU] | Area %  |
|--------|---------------|------|-------------|--------------|--------------|---------|
| 1      | 19.460        | FM   | 0.5754      | 154.56577    | 4.47691      | 5.7026  |
| 2      | 23.778        | BB   | 0.6268      | 2555.87793   | 62.54356     | 94.2974 |



## 8. X-ray structures of (2*R*,7*S*,*E*)-*trans*-10 and (2*R*,7*R*,*E*)-*cis*-10

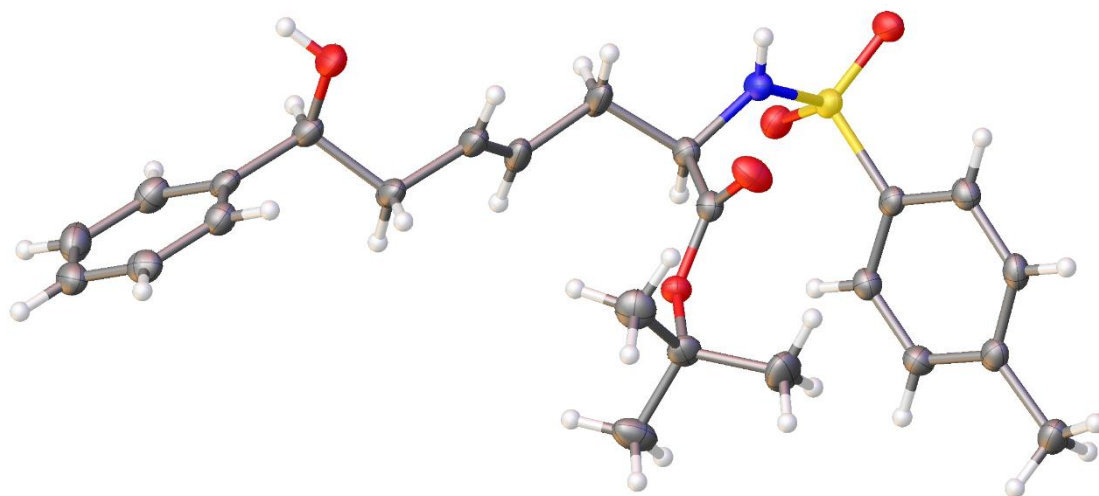

**Figure S1.** X-ray structure of (2*R*,7*S*,*E*)-*trans*-10.

Crystal data for (2*R*,7*S*,*E*)-*trans*-10:  $2(\text{C}_{24}\text{H}_{31}\text{NO}_5\text{S})$ ,  $M_r = 891.11$ ,  $T = 100$  K, monoclinic, space group  $P 1 21 1$ ,  $a = 18.8686(2)$ ,  $b = 5.43670(10)$ ,  $c = 22.9849(2)$  Å,  $\alpha = 90$ ,  $\beta = 94.9320(10)$ ,  $\gamma = 90$ ,  $V = 2349.13(5)$  Å<sup>3</sup>,  $Z = 2$ , 8325 unique reflections, final  $R_1 = 0.0362$  and  $wR_2 = 0.0991$  for 8532 observed [ $I > 2\sigma(I)$ ] reflections, Flack  $\chi = 0.023(13)$ . CCDC 2328948 contains the supplementary crystallographic data for this paper. These data can be obtained free of charge via [www.ccdc.cam.ac.uk/conts/retrieving.html](http://www.ccdc.cam.ac.uk/conts/retrieving.html) (or from the Cambridge Crystallographic Data Centre, 12, Union Road, Cambridge CB21EZ, UK; fax: (+44) 1223-336-033; or [deposit@ccdc.cam.ac.uk](mailto:deposit@ccdc.cam.ac.uk)).

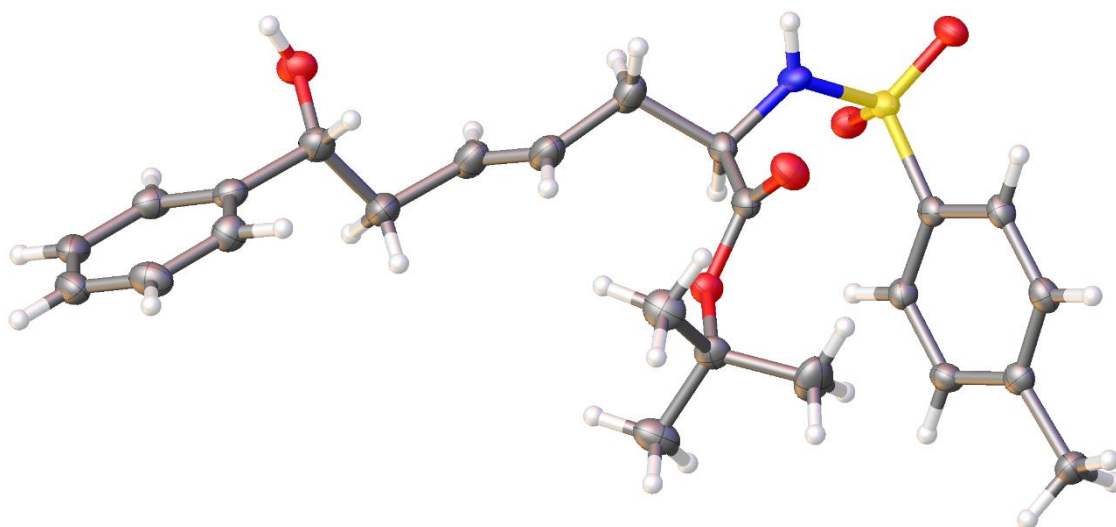

**Figure S2.** X-ray structure of (2*R*,7*R*,*E*)-*cis*-10.

Crystal data for *(2R,7R,E)-cis-10*: C<sub>24</sub>H<sub>31</sub>NO<sub>5</sub>S,  $M_r = 445.56$ ,  $T = 100$  K, monoclinic, space group P 1 21 1,  $a = 12.6662(4)$ ,  $b = 5.60080(10)$ ,  $c = 36.6350(11)$  Å,  $\alpha = 90$ ,  $\beta = 116.175(4)$ ,  $\gamma = 90$ ,  $V = 2332.40(13)$  Å<sup>3</sup>,  $Z = 4$ , 5635 unique reflections, final  $R_1 = 0.0615$  and  $wR_2 = 0.1710$  for 7349 observed [ $I > 2\sigma(I)$ ] reflections, Flack  $\chi = 0.042(15)$ . CCDC 2328949 contains the supplementary crystallographic data for this paper. These data can be obtained free of charge via [www.ccdc.cam.ac.uk/conts/retrieving.html](http://www.ccdc.cam.ac.uk/conts/retrieving.html) (or from the Cambridge Crystallographic Data Centre, 12, Union Road, Cambridge CB21EZ, UK; fax: (+44) 1223-336-033; or [deposit@ccdc.cam.ac.uk](mailto:deposit@ccdc.cam.ac.uk)).

## 9. References

1. (a) Chen, F.; He, D.; Chen L.; Chang, X.; Wang, D.; Xu, C.; Xing, X. Chirality-Economy Catalysis: Asymmetric Transfer Hydrogenation of Ketones by Ru-Catalysts of Minimal Stereogenicity. *ACS Catal.* **2019**, *9*, 5562-5566. (b) Baratta, W.; Herdtweck, E.; Siega, K.; Toniutti, M.; Rigo, P., 2-(Aminomethyl)pyridine–Phosphine Ruthenium(II) Complexes: Novel Highly Active Transfer Hydrogenation Catalysts. *Organometallics* **2005**, *24*, 1660-1669.
2. Richards, C. J.; Mulvaney, A. W. Synthesis of Phosphinoferrocenyloxazolines. New Ligands for Asymmetric Catalysis. *Tetrahedron: Asymmetry* **1996**, *7*, 1419-1430.
3. Smith, C. R.; Mans, D. J.; RajanBabu, T. V. (*R*)-2,2'-Binaphthoyl-(*S,S*)-Di(1-phenylethyl) Aminophosphine. Scalable Protocols for the Syntheses of Phosphoramidite (Feringa) Ligands. *Org Synth.* **2008**, *85*, 238-247.
4. Nie, H.; Zhou, G.; Wang, Q.; Chen, W.; Zhang, S. Asymmetric Hydrogenation of Aromatic Ketones Using an Iridium(I) Catalyst Containing Ferrocene-Based P–N–N Tridentate Ligands. *Tetrahedron: Asymmetry* **2013**, *24*, 1567-1571.
5. Fernandes, R. A.; Gangani, A. J.; Panja, A. Synthesis of 5-Vinyl-2-isoxazolines by Palladium-Catalyzed Intramolecular *O*-Allylation of Ketoximes. *Org. Lett.* **2021**, *23*, 6227-6231; (b) Cheng, T.; Liu B.; Wu, R.; Zhu S. Cu-catalyzed Carboboration of Acetylene with Michael Acceptors. *Chem. Sci.* **2022**, *13*, 7604-7609; (c) Carreño, M. C.; García-Cerrada, S.; Urbano, A.; Vitta, C. D. Studies of Diastereoselectivity in Diels-Alder Reactions of Enantiopure (*S,S*)-2-(*p*-Tolylsulfinyl)-1,4-naphthoquinone and Chiral Racemic Acyclic Dienes. *J. Org. Chem.* **2000**, *65*, 4355-4363.
6. Kim, H. Y.; Oh, K. 1,3-Dienones and 2*H*-Pyran-2-ones from Soft  $\alpha$ -Vinyl Enolization of  $\beta$ -Chlorovinyl Ketones: Defined Roles of Brønsted and Lewis Base. *Org. Lett.* **2015**, *17*, 6254-6257; (b) Kim, H. Y.; Li, J. Y.; Oh, K. Studies on Elimination Pathways of  $\beta$ -Halovinyl Ketones Leading to Allenyl and Propargyl Ketones and Furans under the Action of Mild Bases. *J. Org. Chem.* **2012**, *77*, 11132-11145.

## 10. NMR spectra

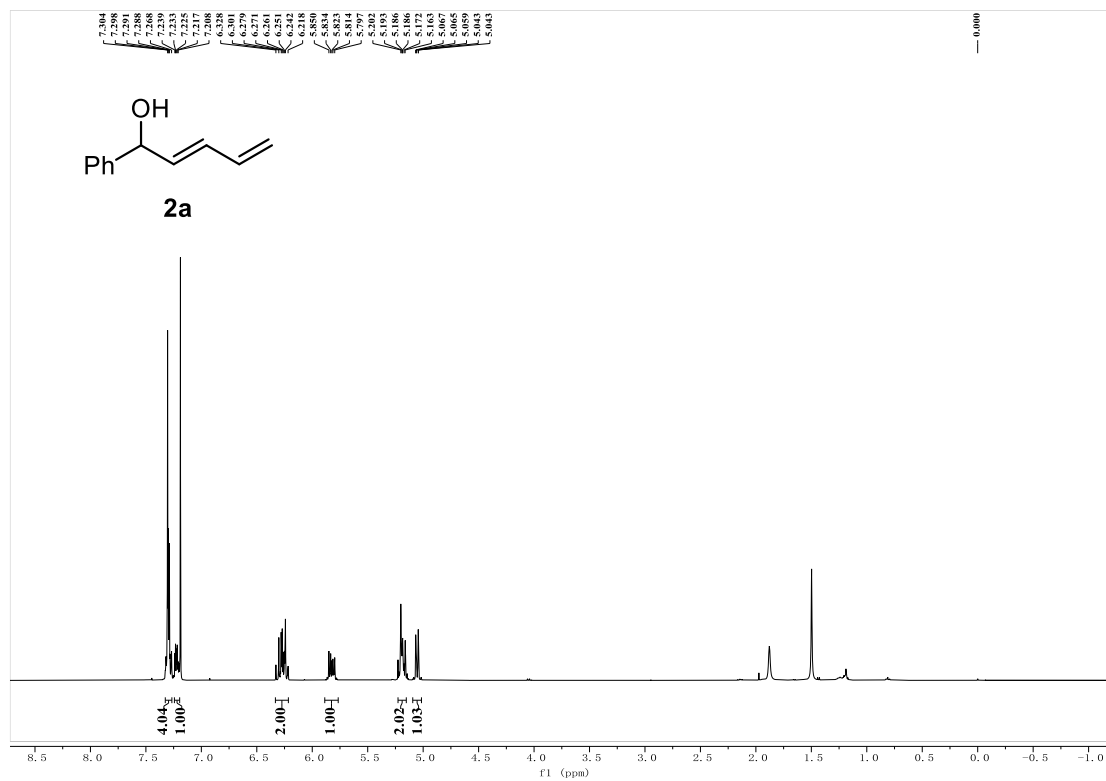

<sup>1</sup>H NMR (400 MHz, CDCl<sub>3</sub>) of **2a**

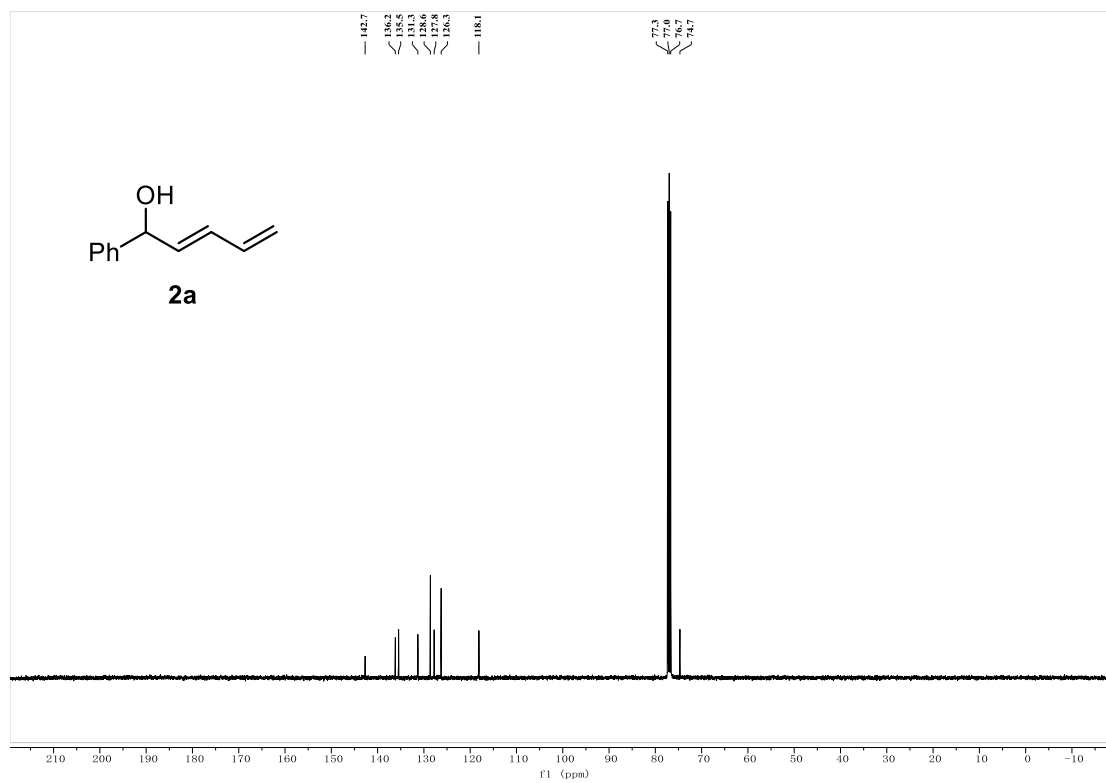

<sup>13</sup>C NMR (101 MHz, CDCl<sub>3</sub>) of **2a**

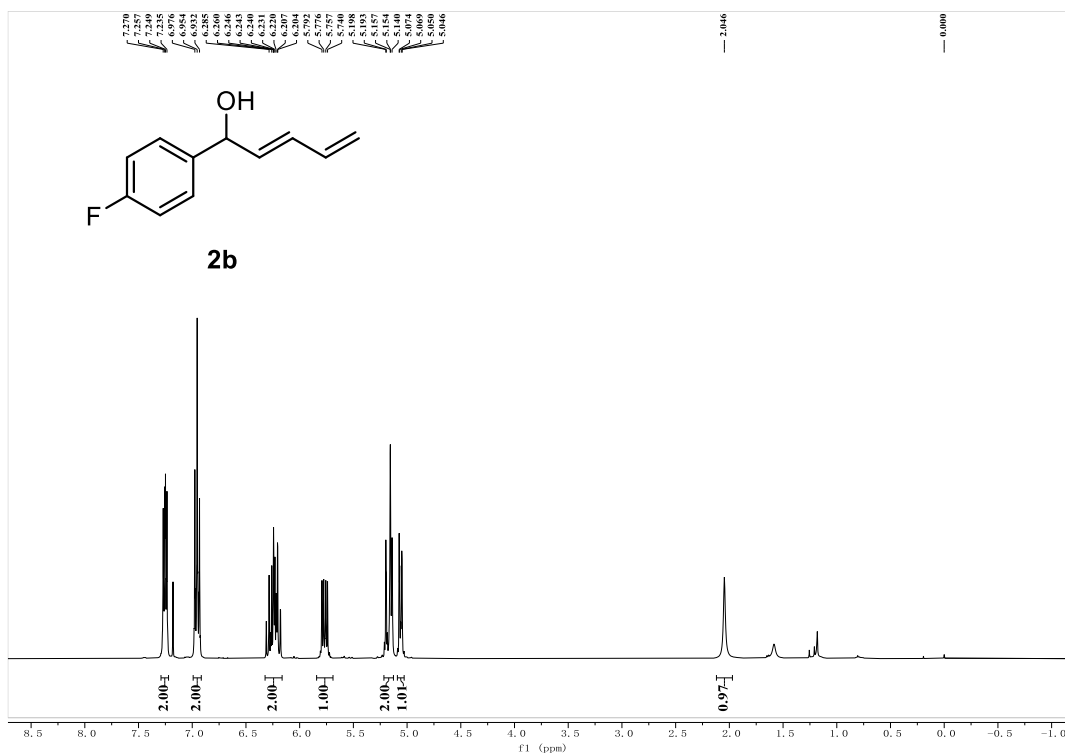

<sup>1</sup>H NMR (400 MHz, CDCl<sub>3</sub>) of **2b**

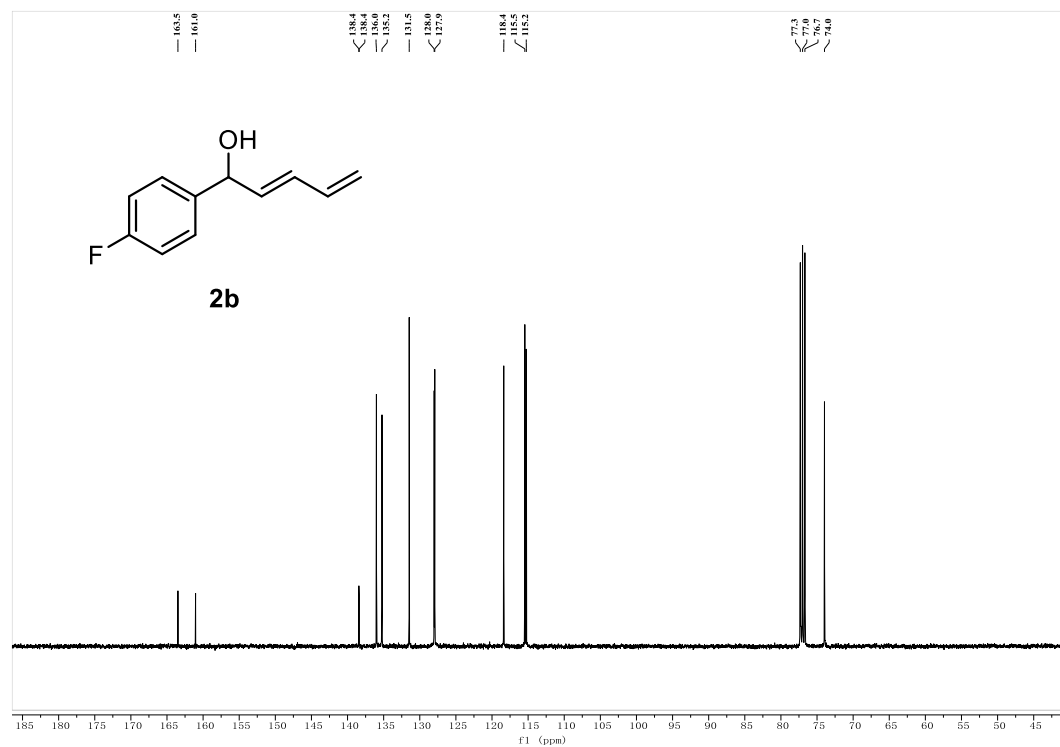

<sup>13</sup>C NMR (101 MHz, CDCl<sub>3</sub>) of **2b**

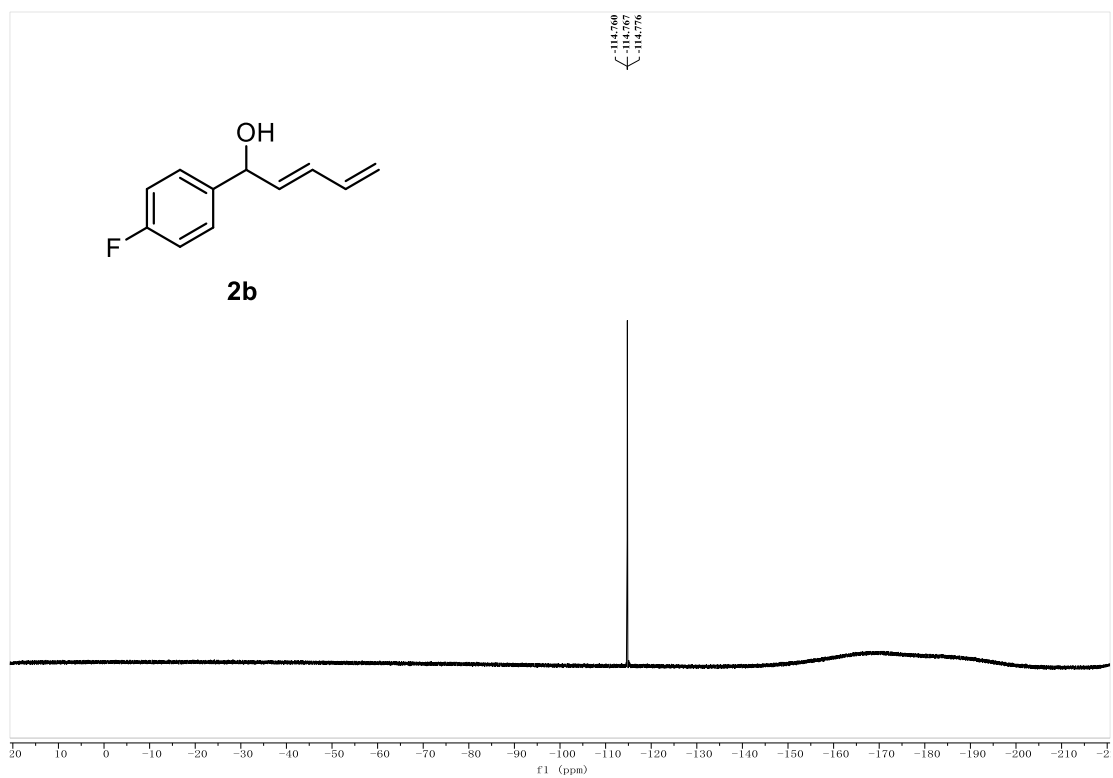

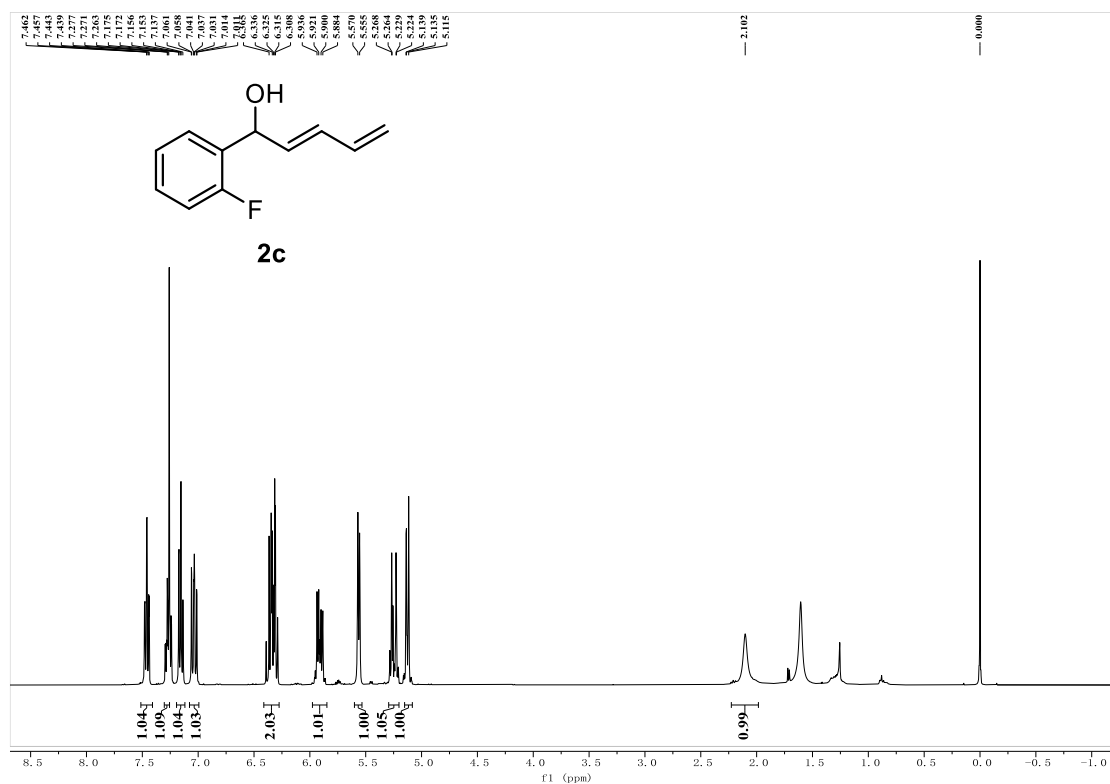

**<sup>1</sup>H NMR (400 MHz, CDCl<sub>3</sub>) of 2c**

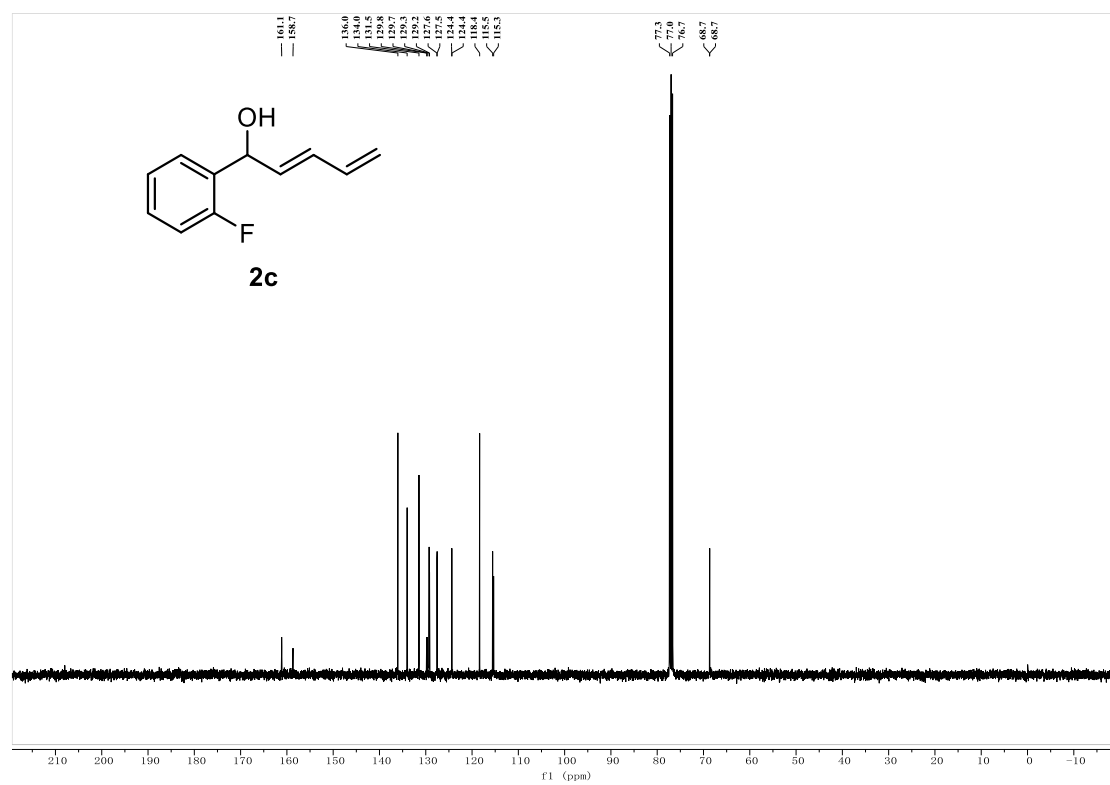

**<sup>13</sup>C NMR (101 MHz, CDCl<sub>3</sub>) of 2c**

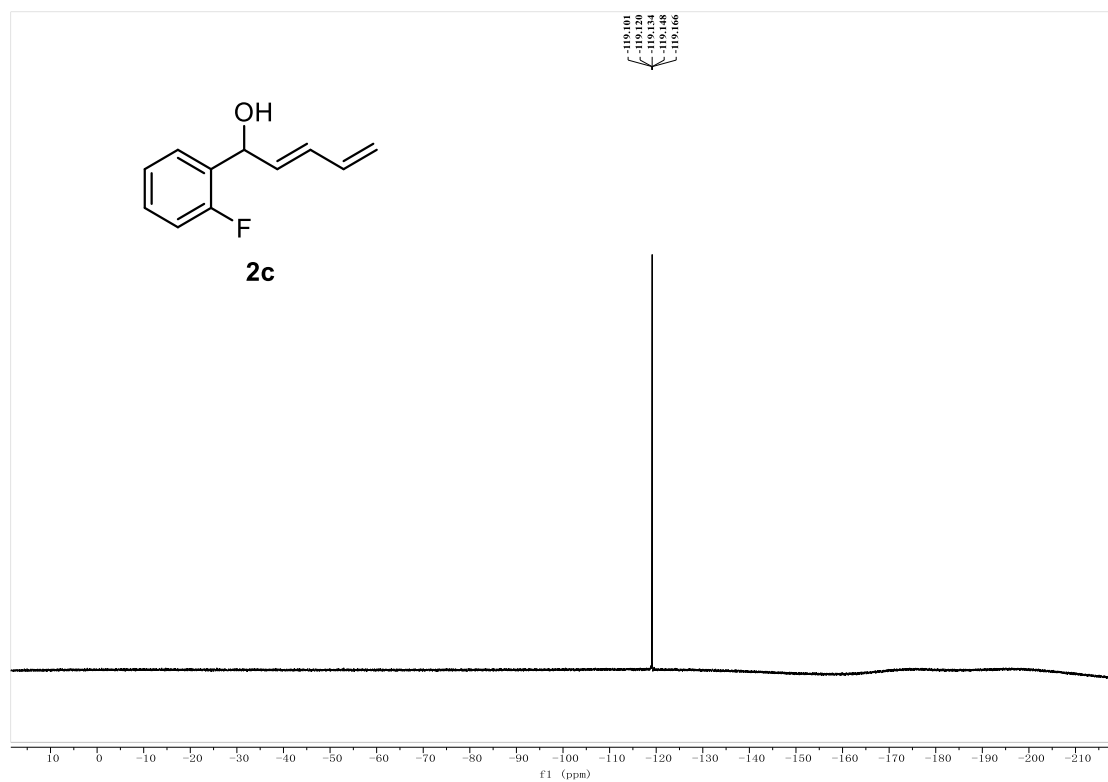



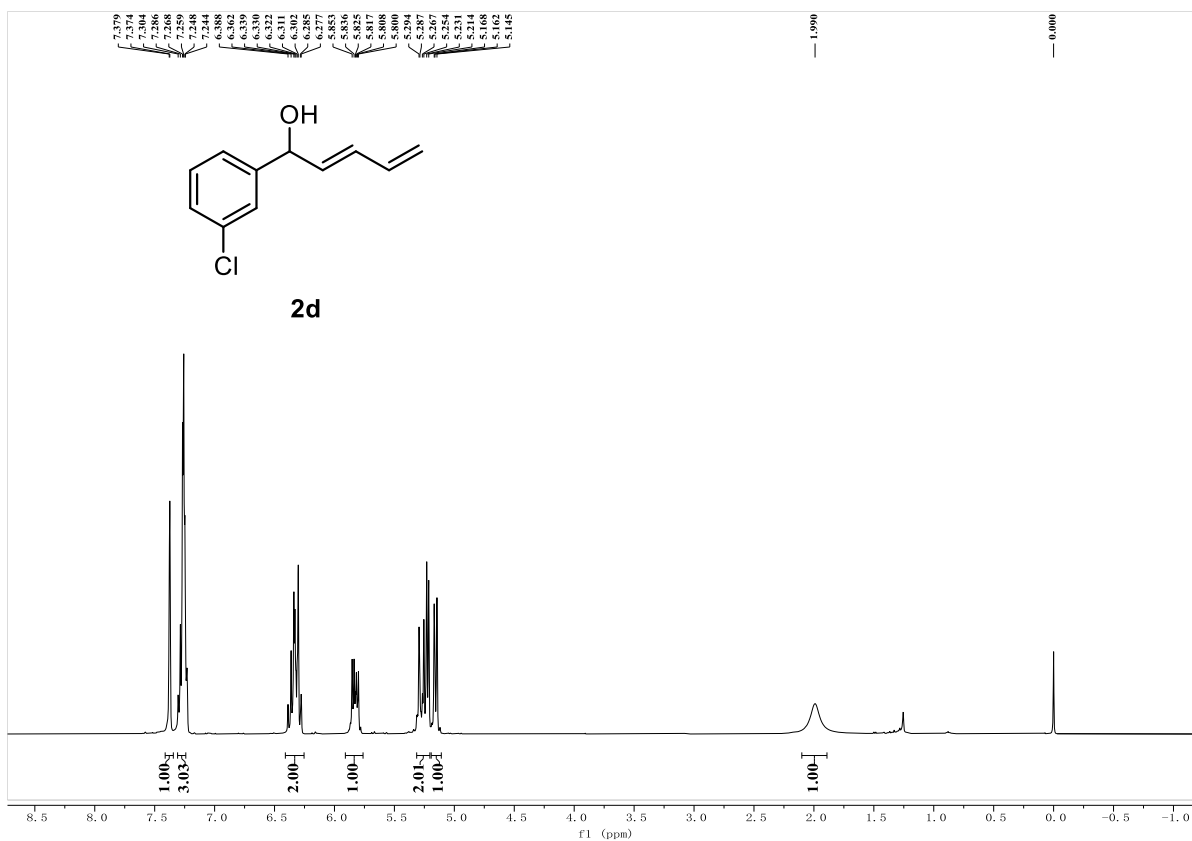

<sup>1</sup>H NMR (400 MHz, CDCl<sub>3</sub>) of **2d**

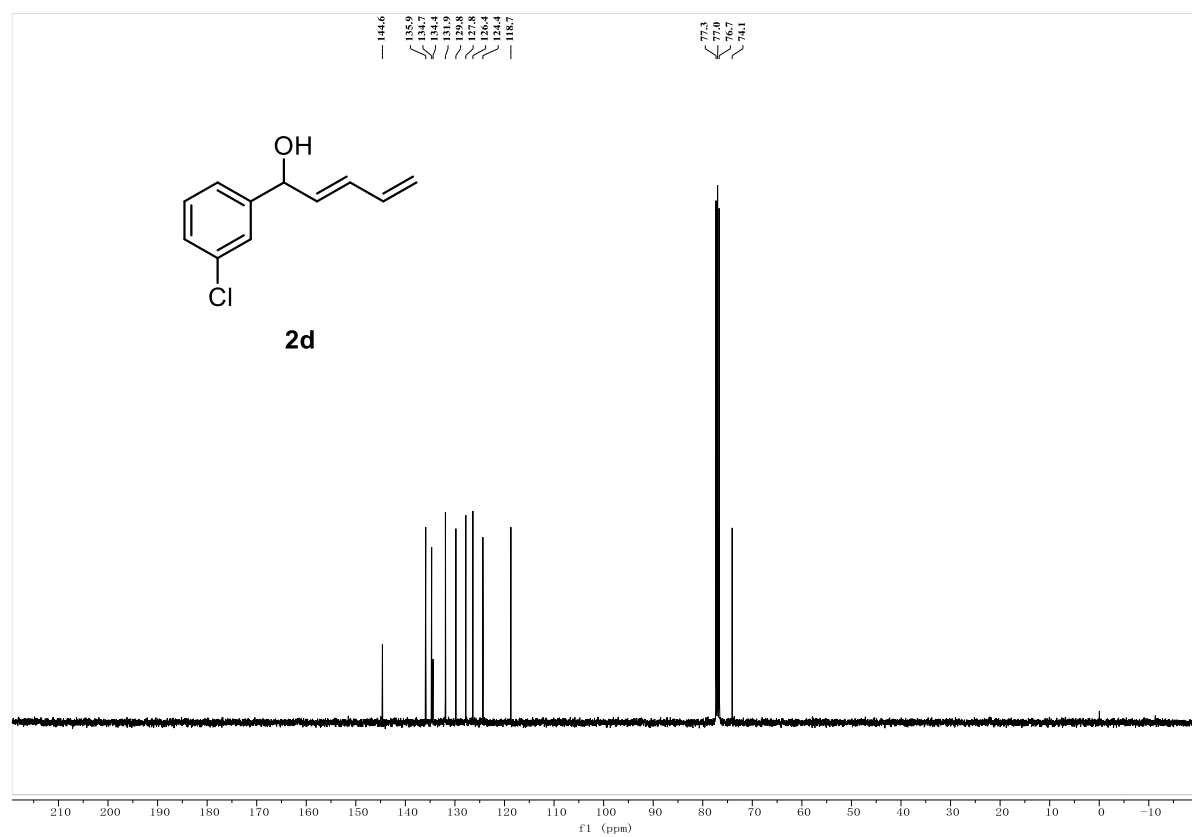

<sup>13</sup>C NMR (101 MHz, CDCl<sub>3</sub>) of **2d**

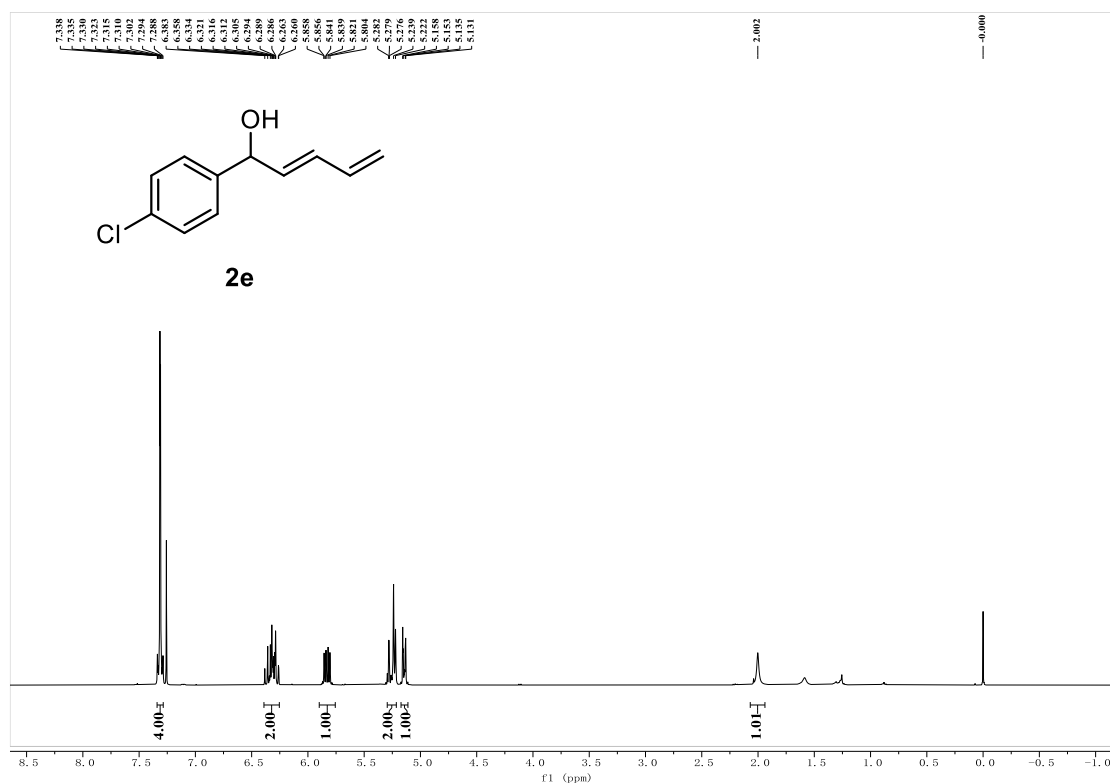

**<sup>1</sup>H NMR (400 MHz, CDCl<sub>3</sub>) of 2e**

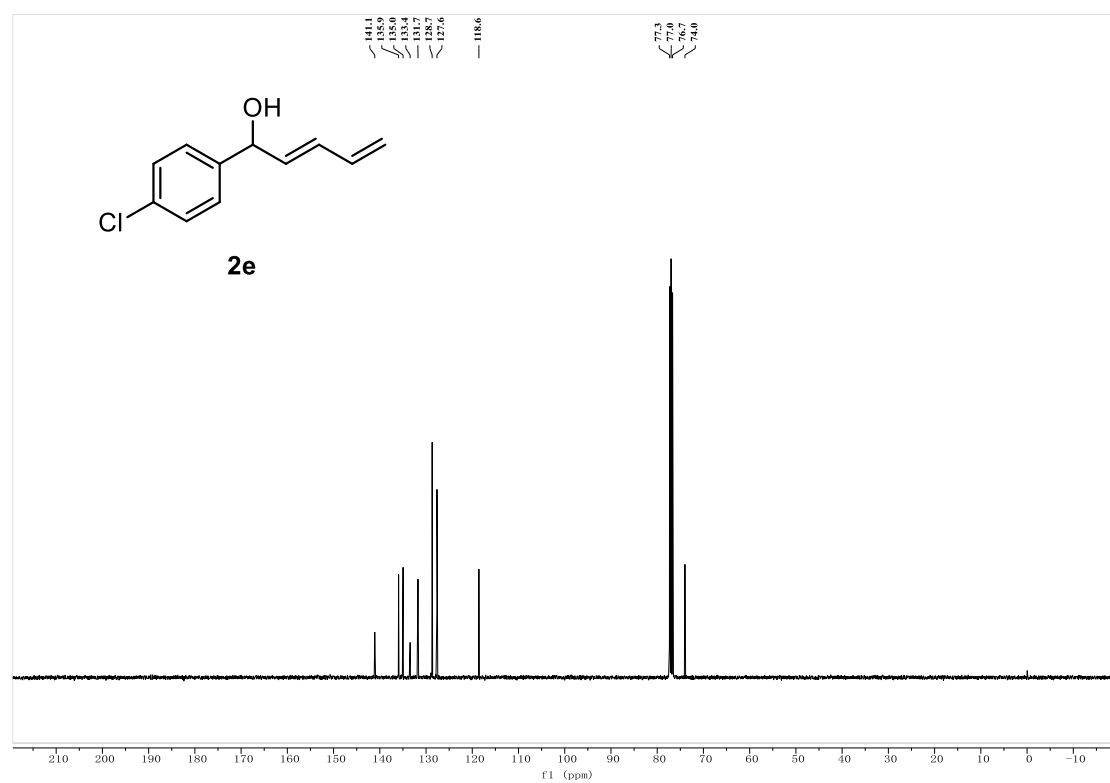

**<sup>13</sup>C NMR (101 MHz, CDCl<sub>3</sub>) of 2e**

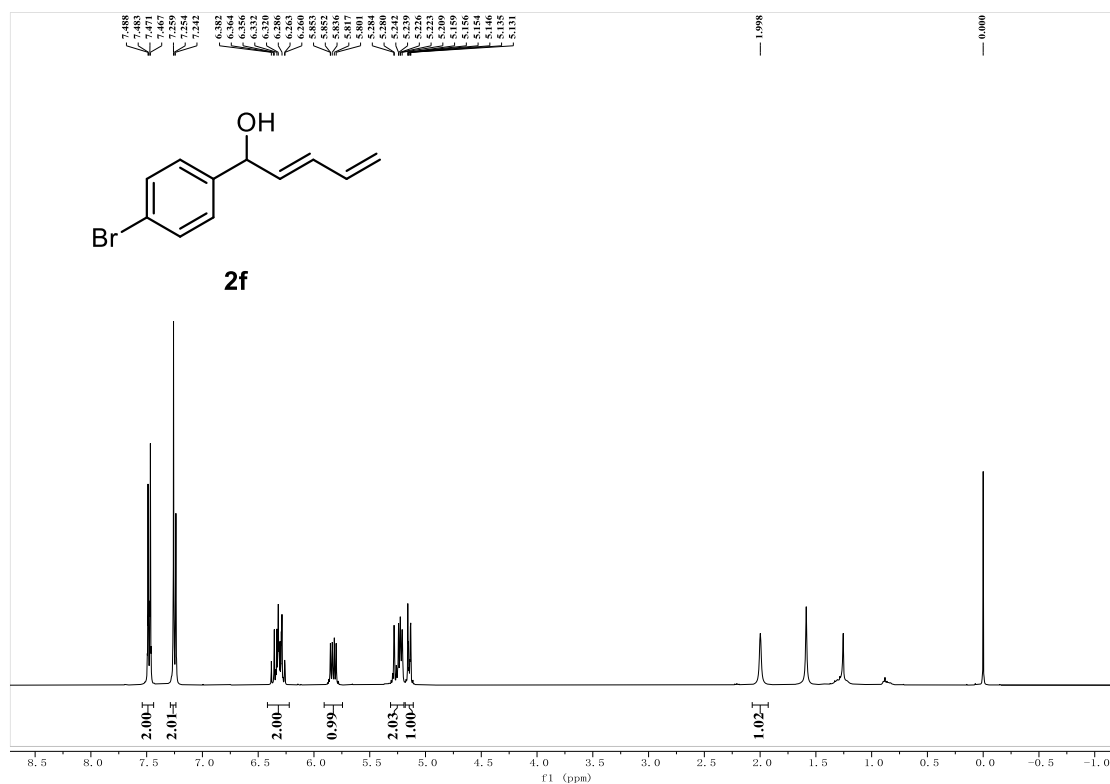

<sup>1</sup>H NMR (400 MHz, CDCl<sub>3</sub>) of **2f**

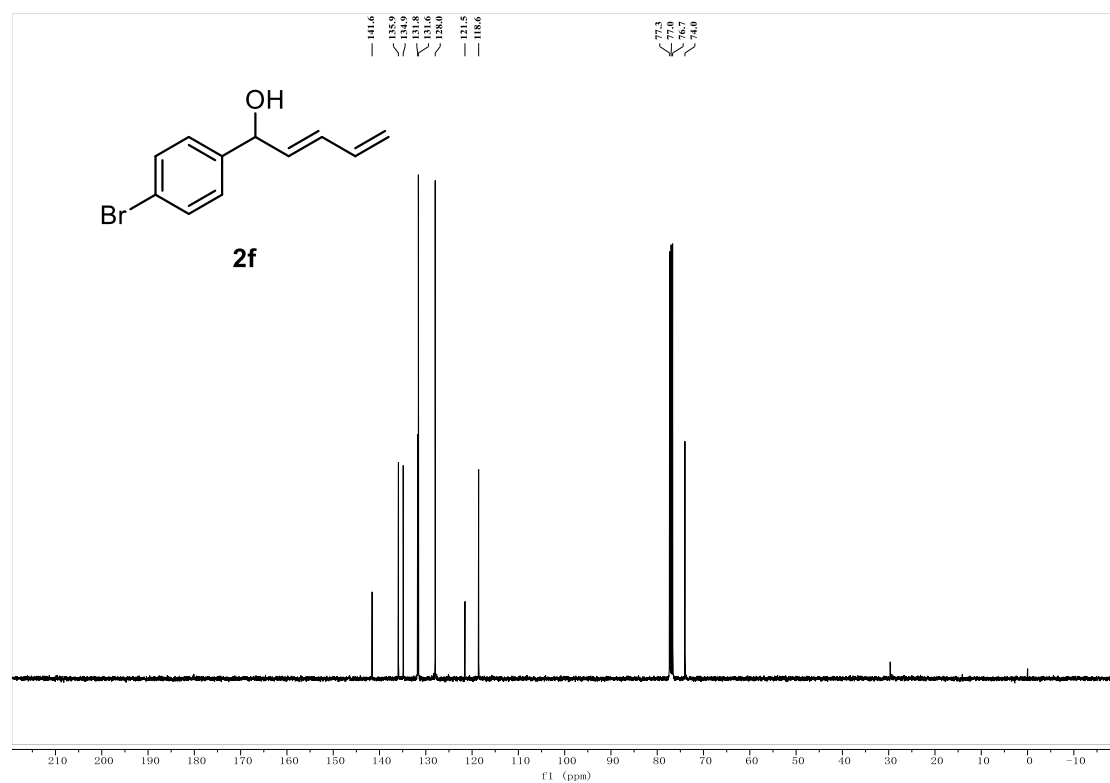

<sup>13</sup>C NMR (101 MHz, CDCl<sub>3</sub>) of **2f**

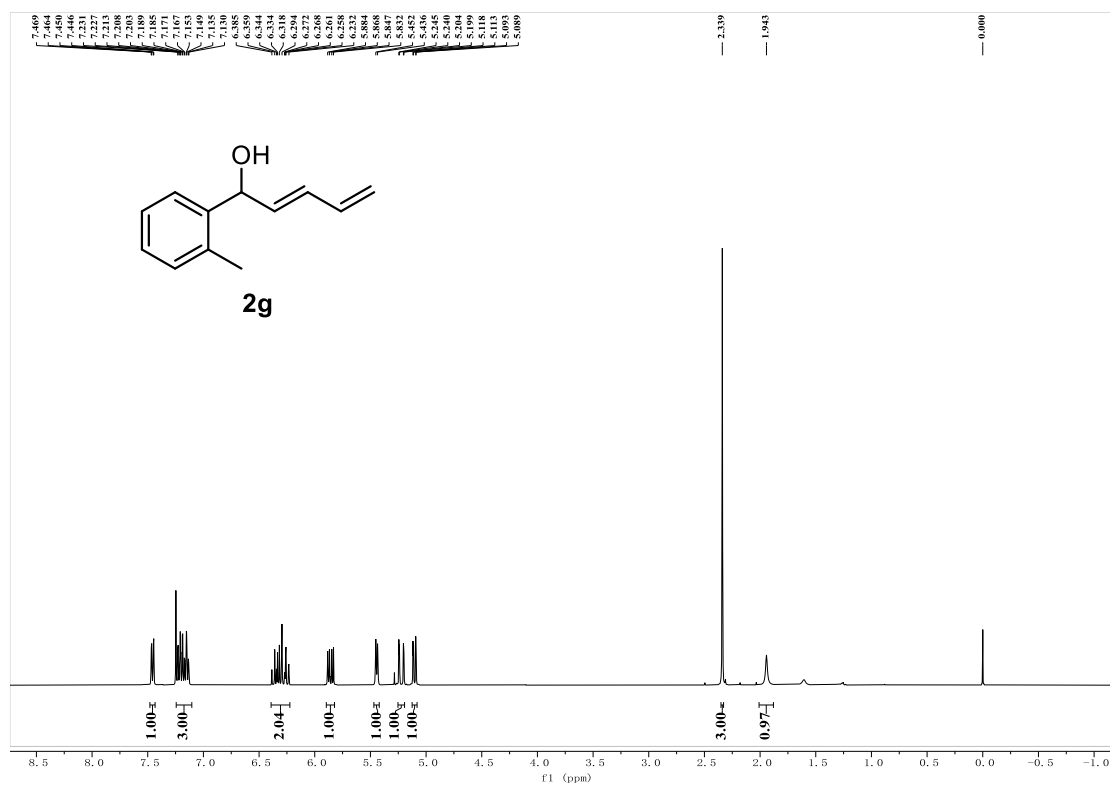

<sup>1</sup>H NMR (400 MHz, CDCl<sub>3</sub>) of **2g**

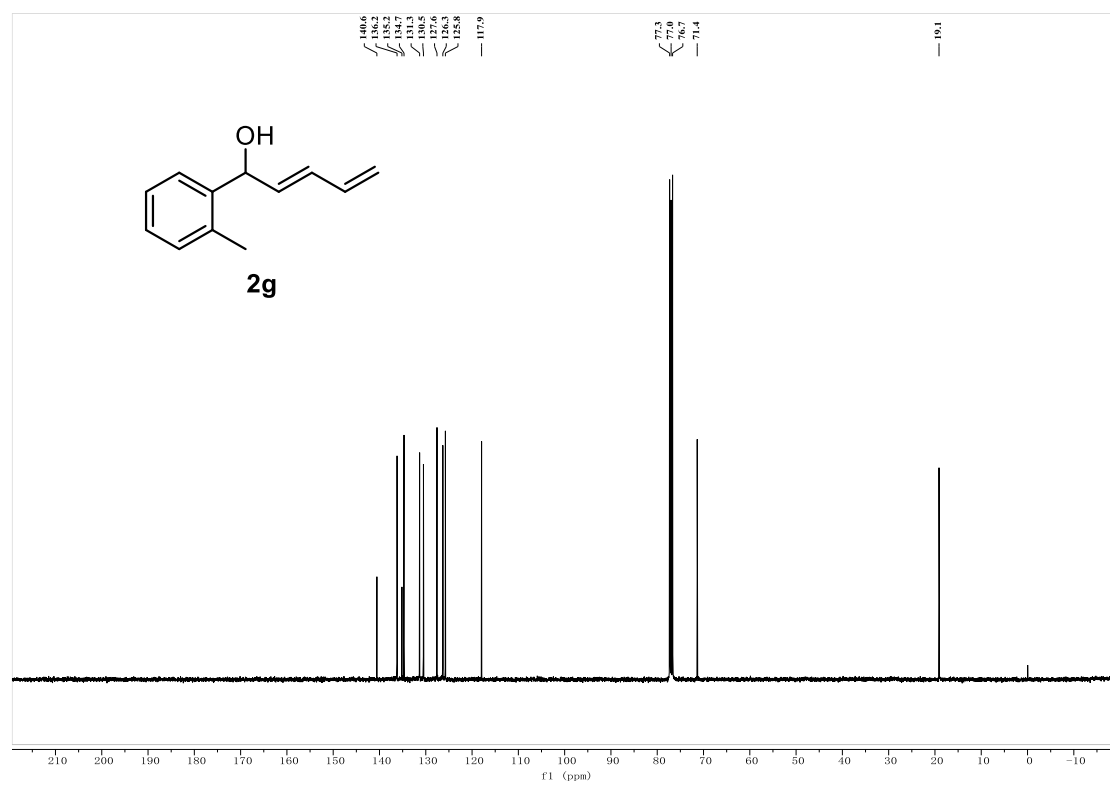

<sup>13</sup>C NMR (101 MHz, CDCl<sub>3</sub>) of **2g**

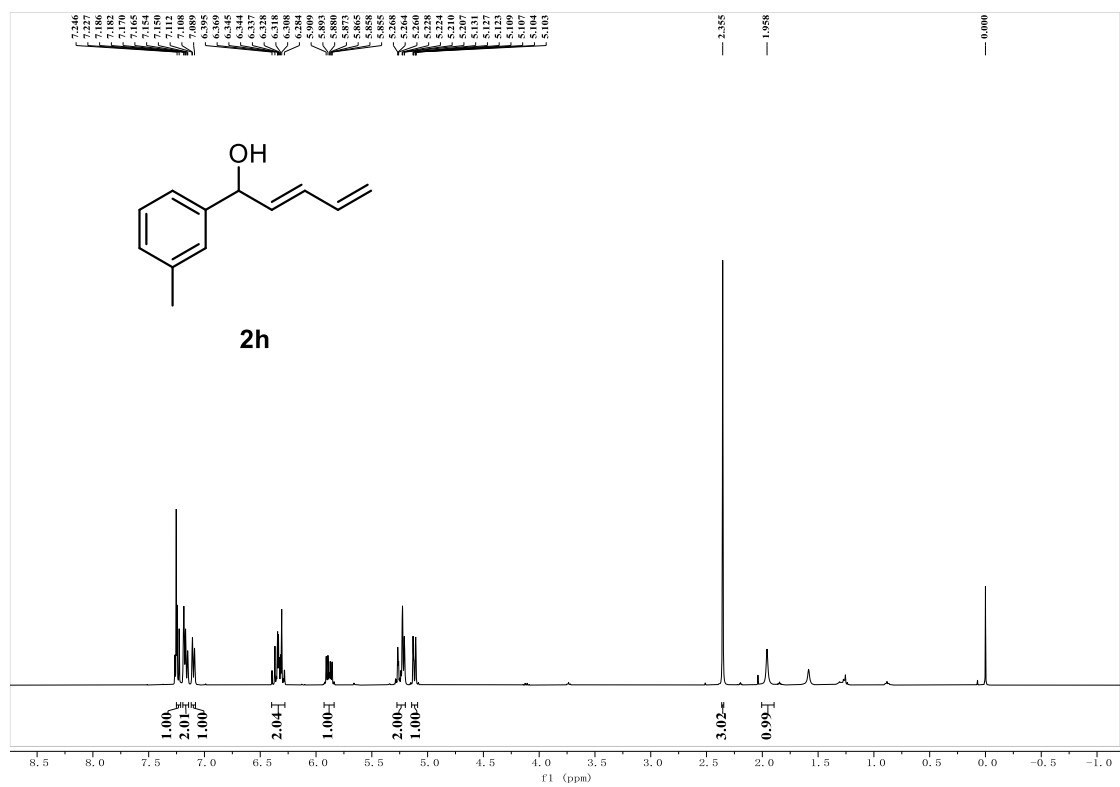

**<sup>1</sup>H NMR (400 MHz, CDCl<sub>3</sub>) of 2h**

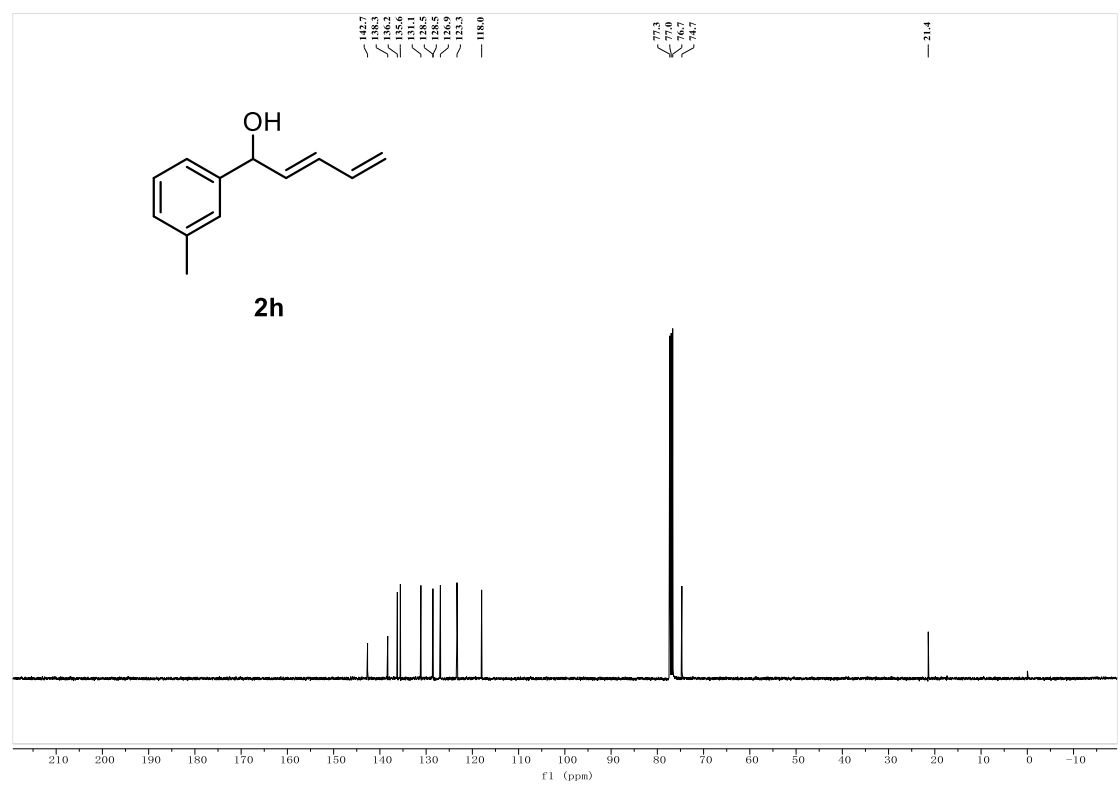

**<sup>13</sup>C NMR (101 MHz, CDCl<sub>3</sub>) of 2h**

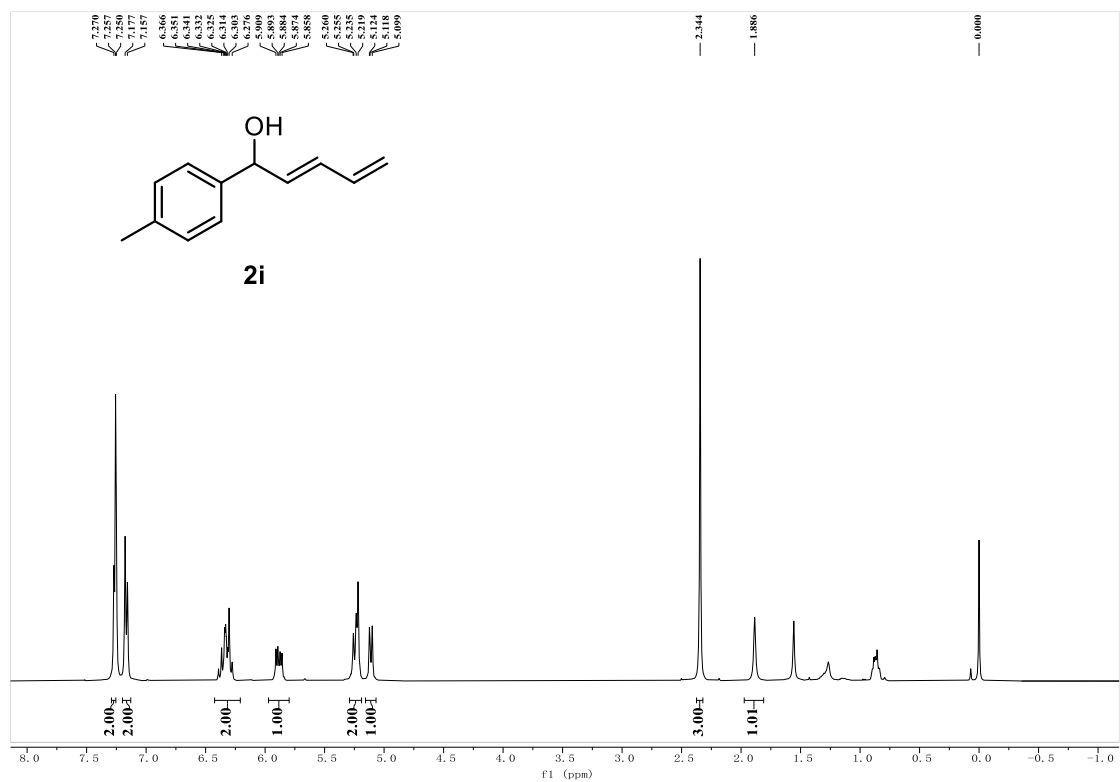

<sup>1</sup>H NMR (400 MHz, CDCl<sub>3</sub>) of **2i**

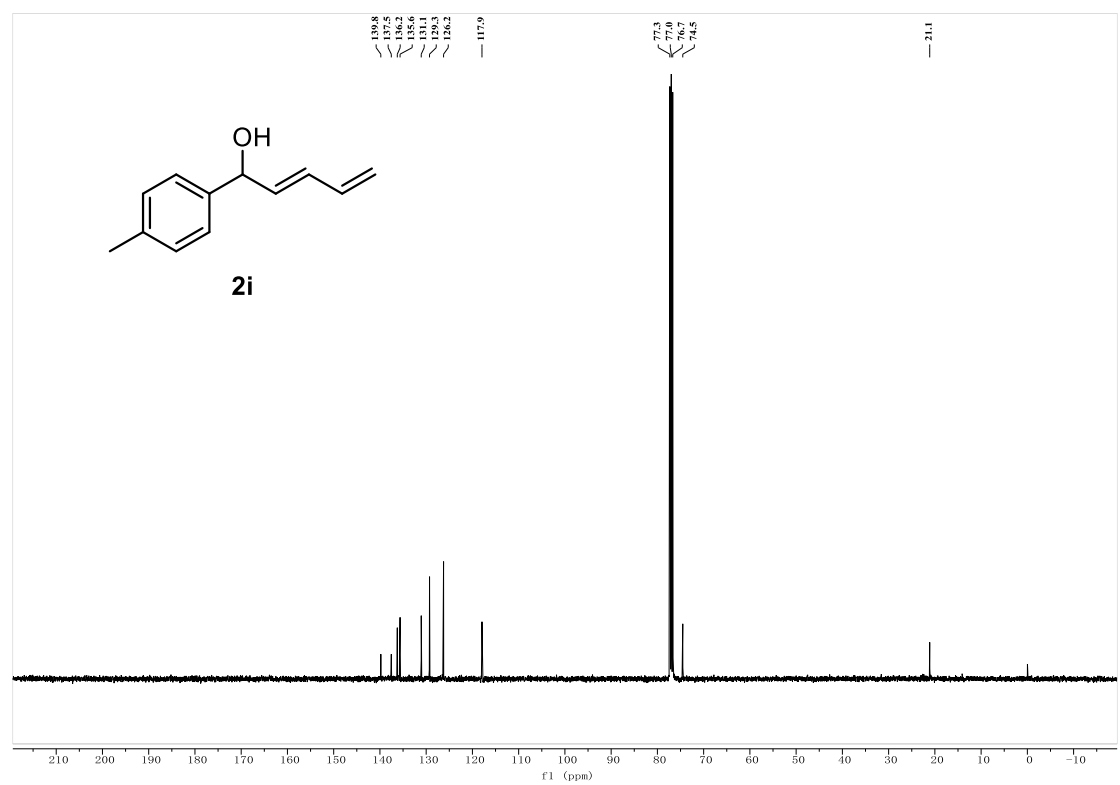

<sup>13</sup>C NMR (101 MHz, CDCl<sub>3</sub>) of **2i**

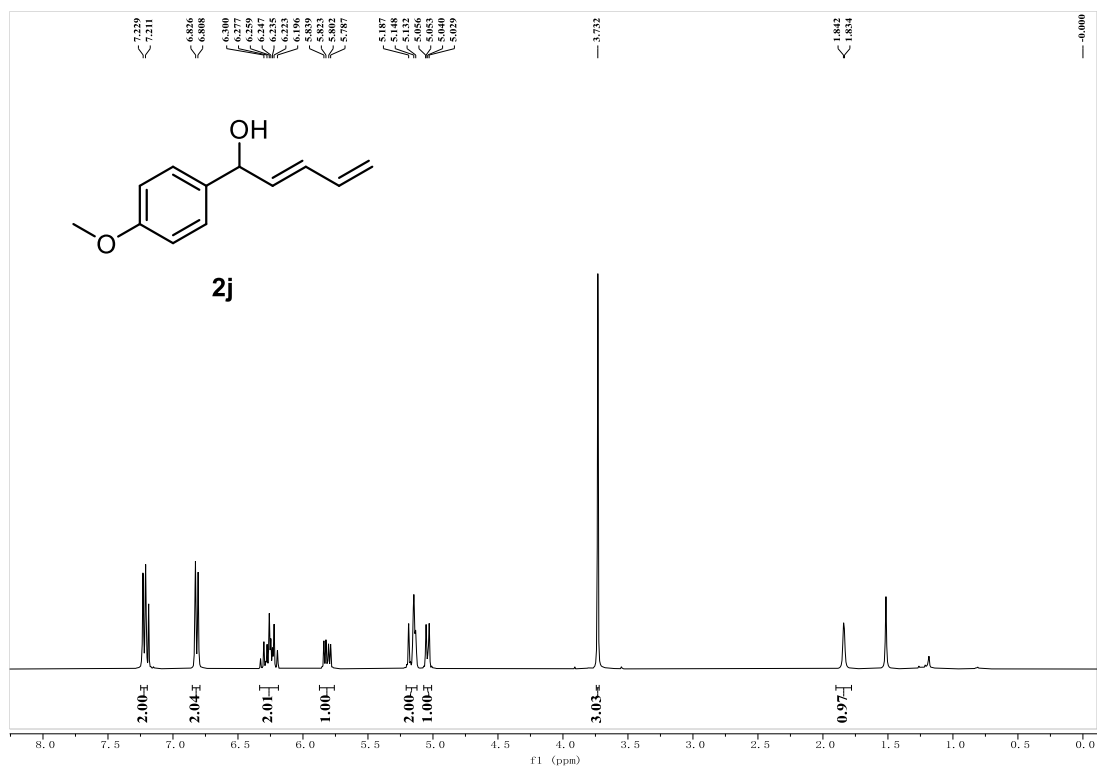

<sup>1</sup>H NMR (400 MHz, CDCl<sub>3</sub>) of **2j**

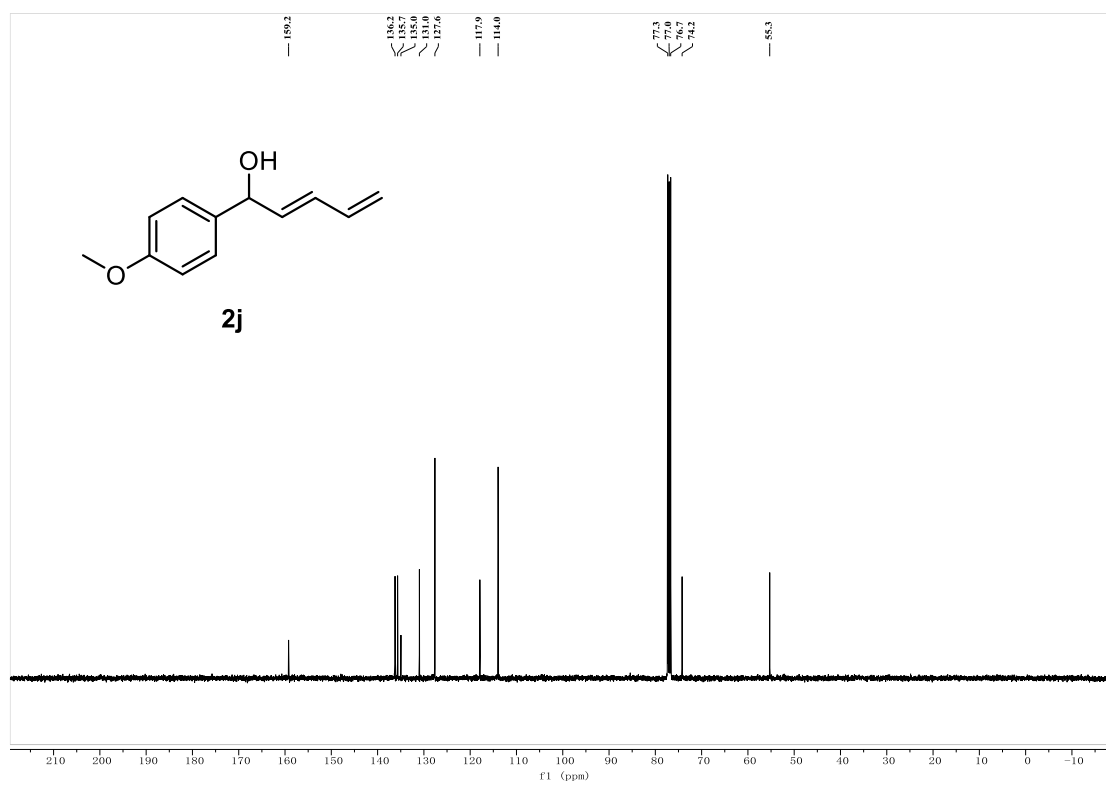

<sup>13</sup>C NMR (101 MHz, CDCl<sub>3</sub>) of **2j**

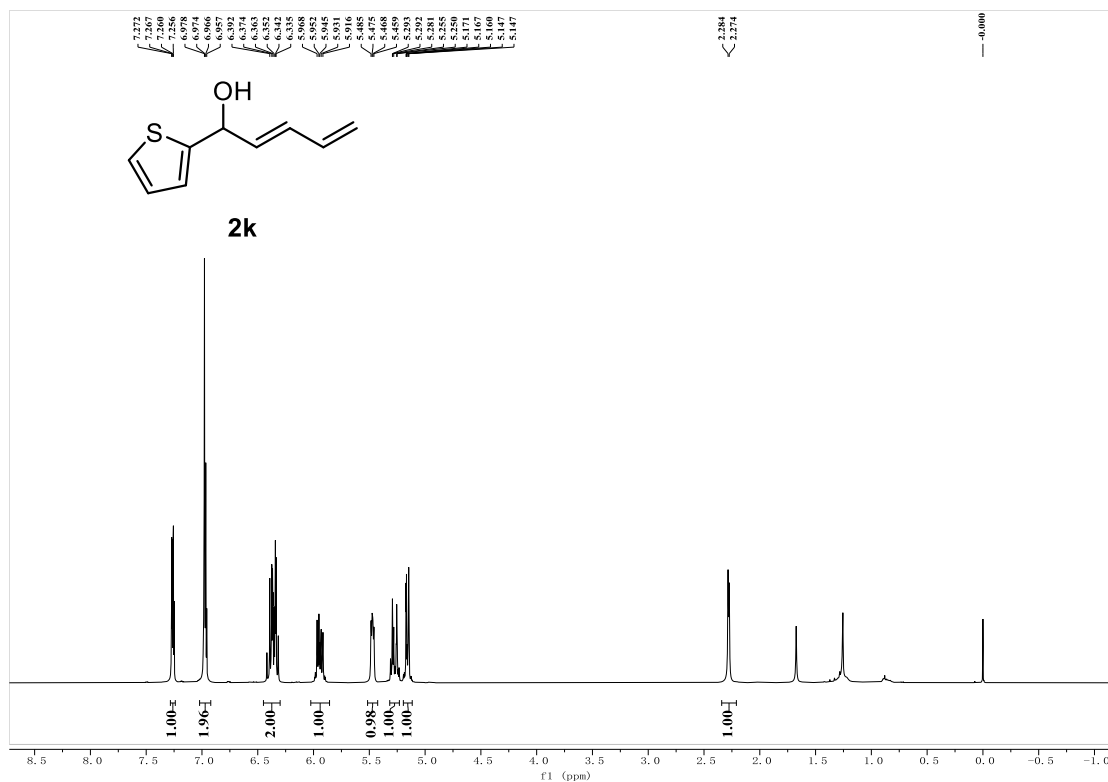

<sup>1</sup>H NMR (400 MHz, CDCl<sub>3</sub>) of **2k**

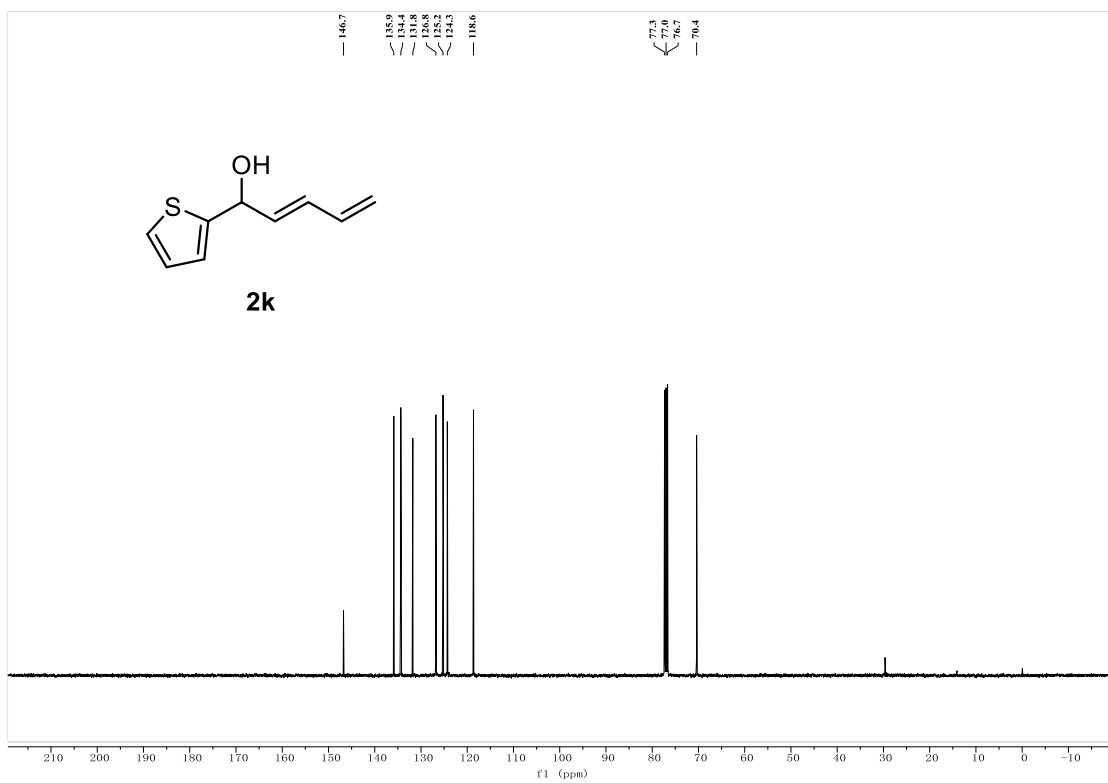

<sup>13</sup>C NMR (101 MHz, CDCl<sub>3</sub>) of **2k**



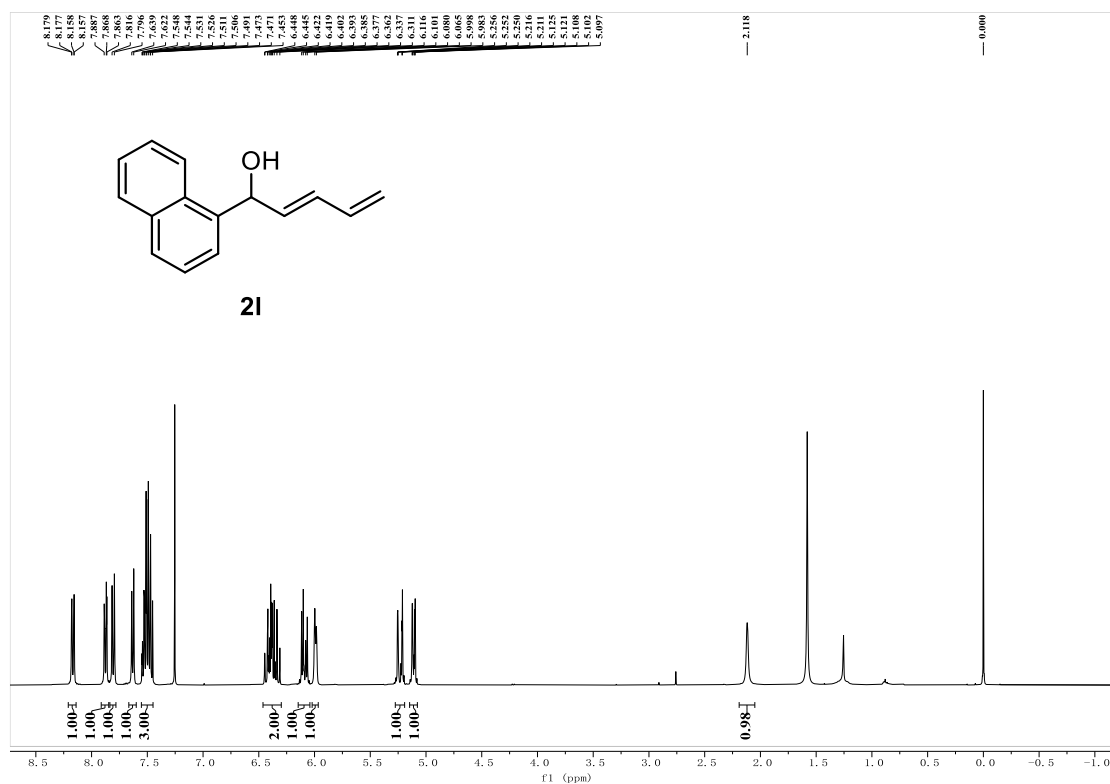

<sup>1</sup>H NMR (400 MHz, CDCl<sub>3</sub>) of **21**

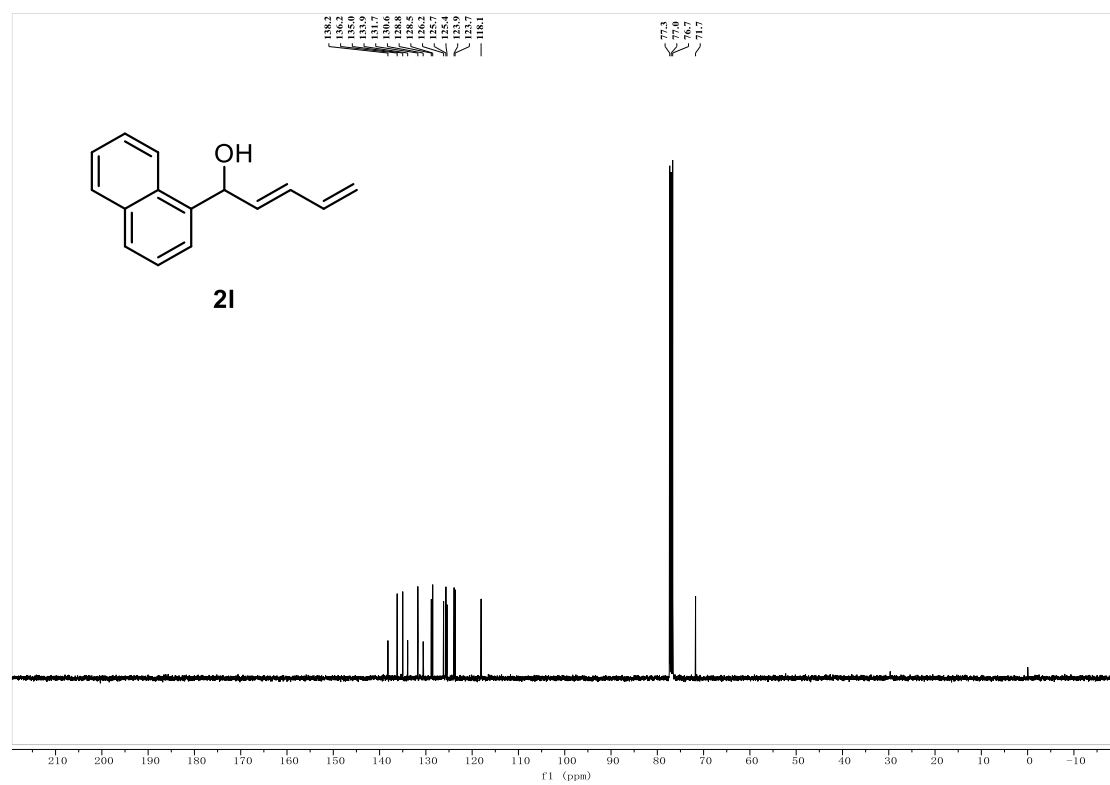

<sup>13</sup>C NMR (101 MHz, CDCl<sub>3</sub>) of **21**

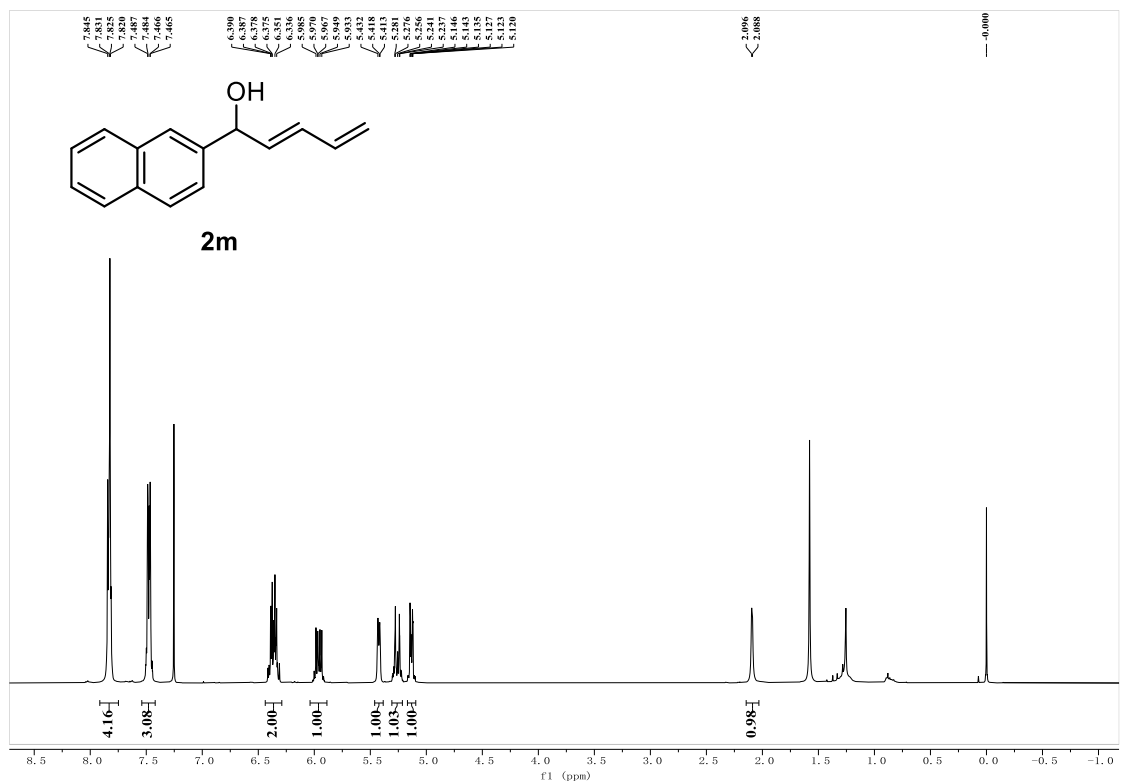

<sup>1</sup>H NMR (400 MHz, CDCl<sub>3</sub>) of **2m**

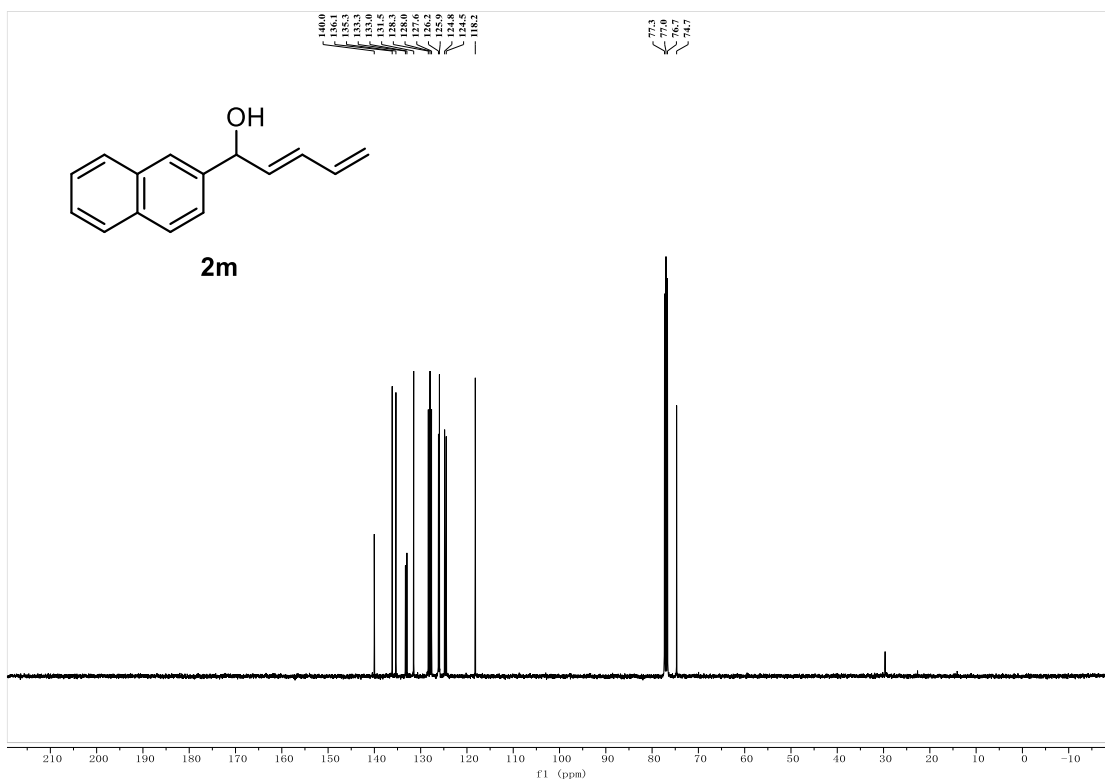

<sup>13</sup>C NMR (101 MHz, CDCl<sub>3</sub>) of **2m**

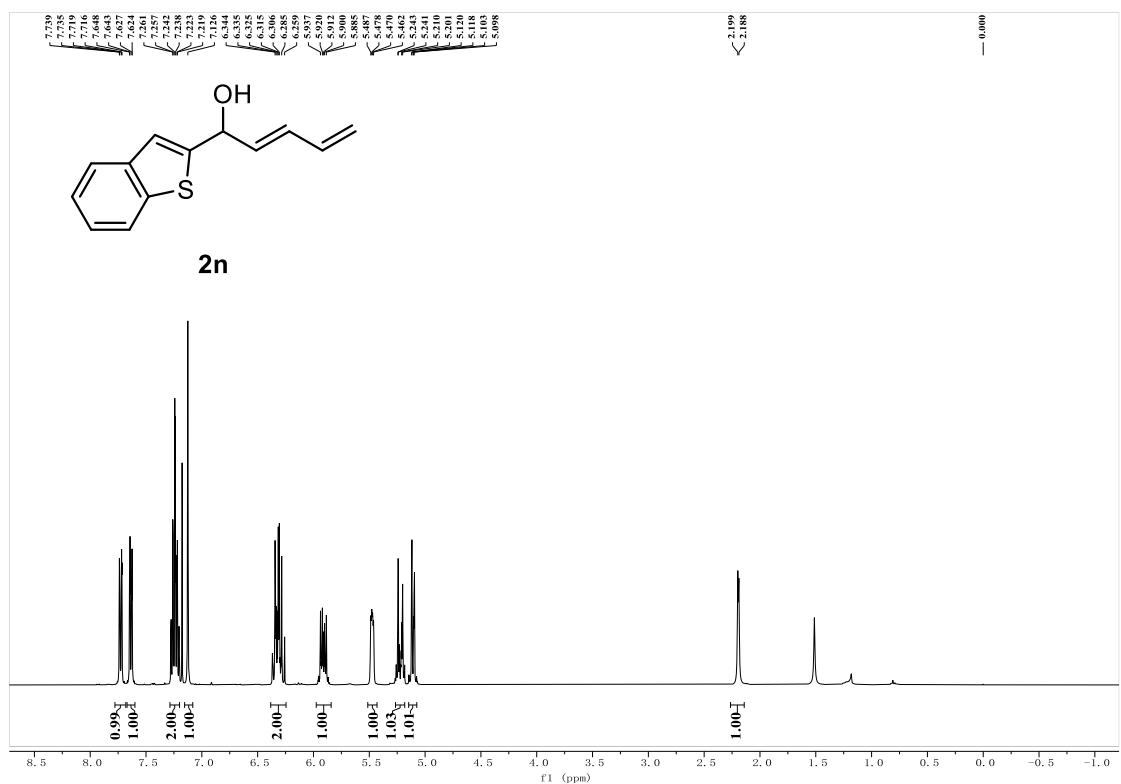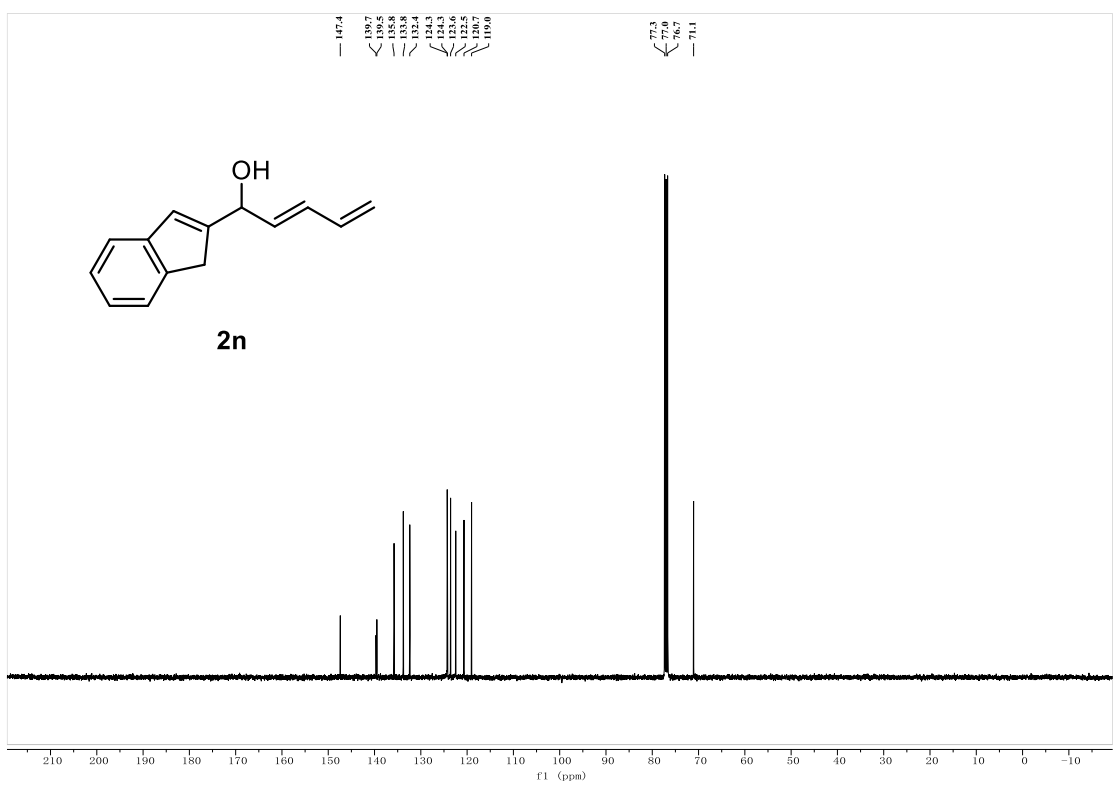

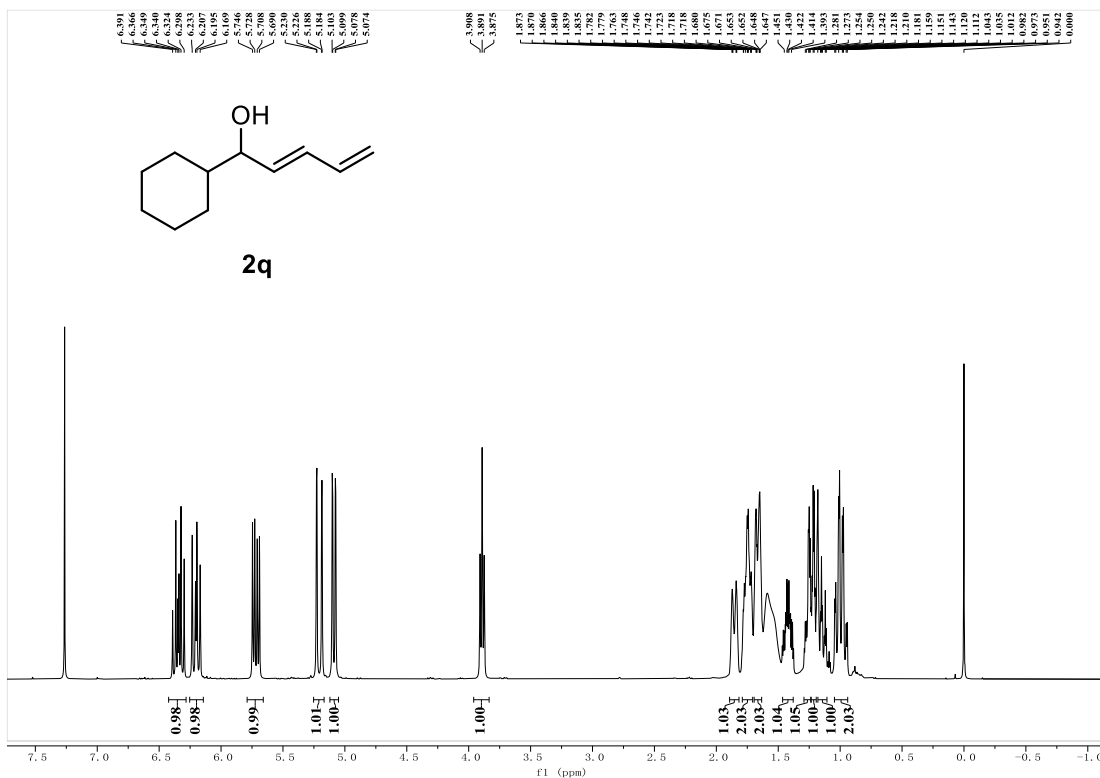

**<sup>1</sup>H NMR (400 MHz, CDCl<sub>3</sub>) of 2q**

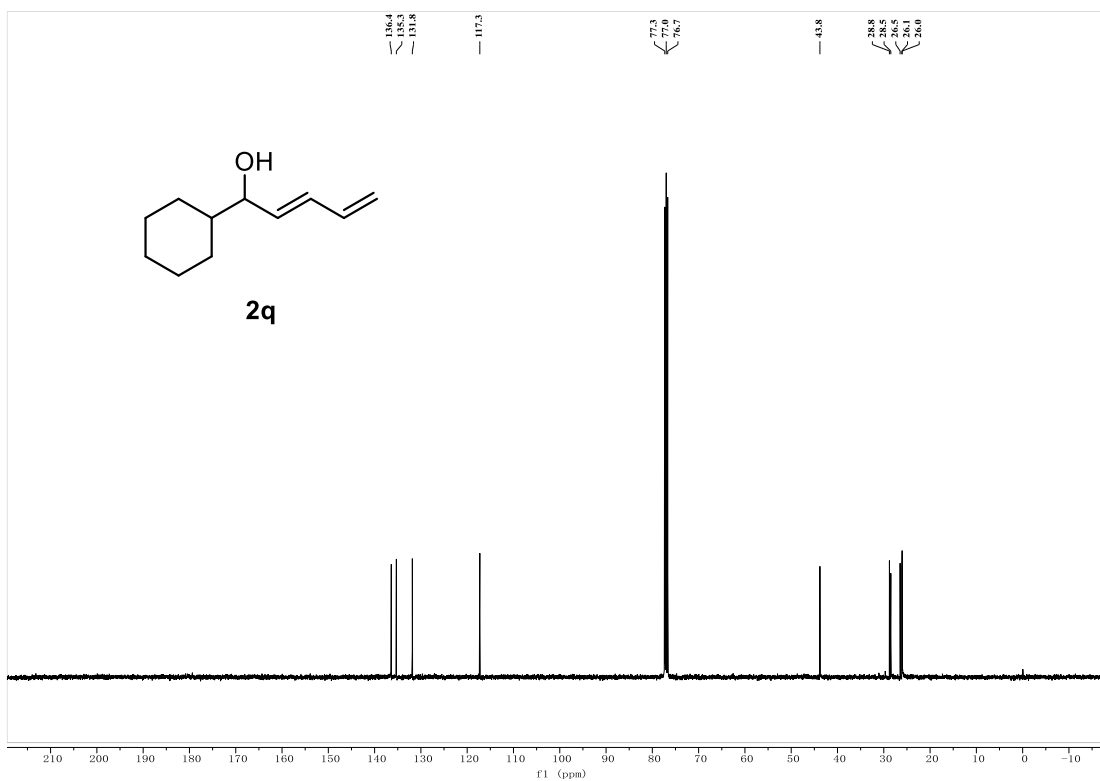

**<sup>13</sup>C NMR (101 MHz, CDCl<sub>3</sub>) of 2q**

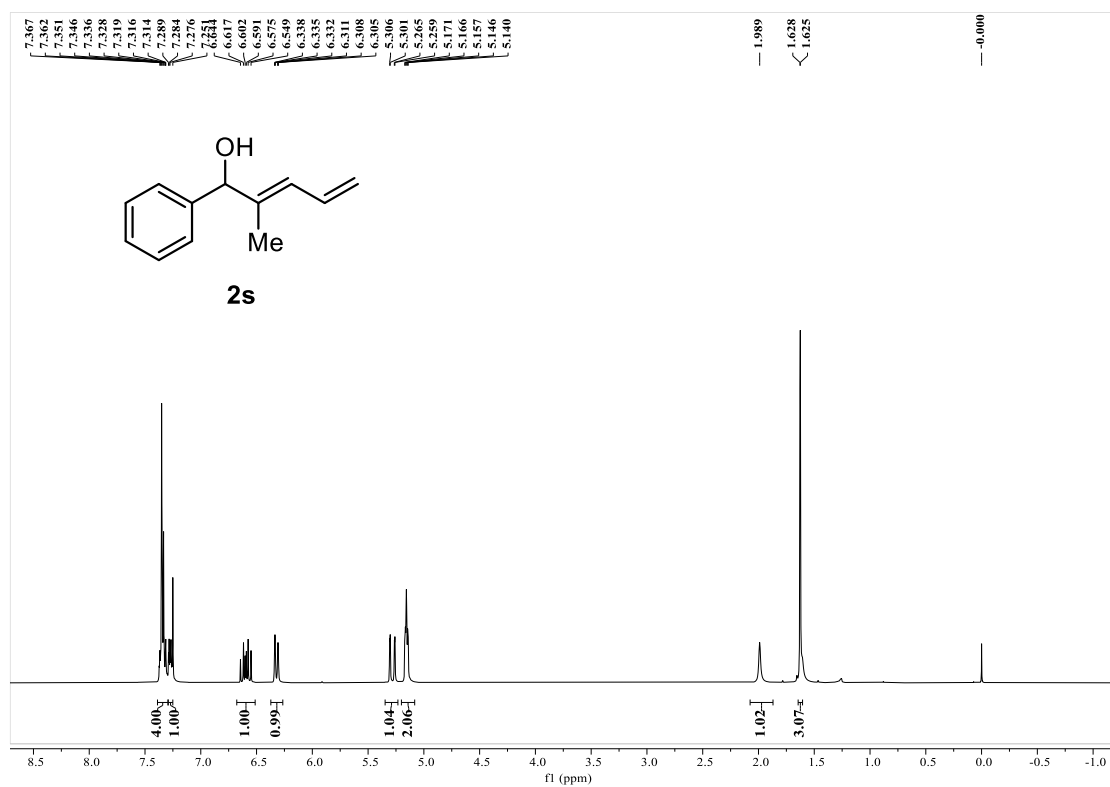

<sup>1</sup>H NMR (400 MHz, CDCl<sub>3</sub>) of **2s**

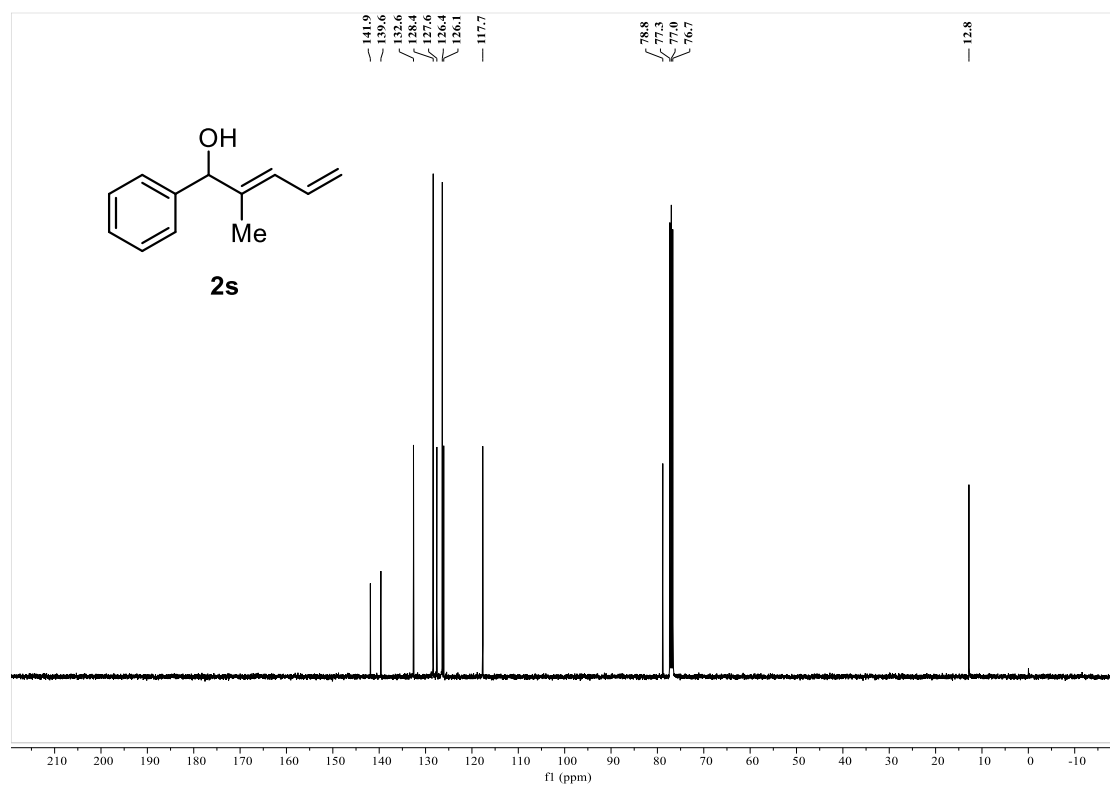

<sup>13</sup>C NMR (101 MHz, CDCl<sub>3</sub>) of **2s**

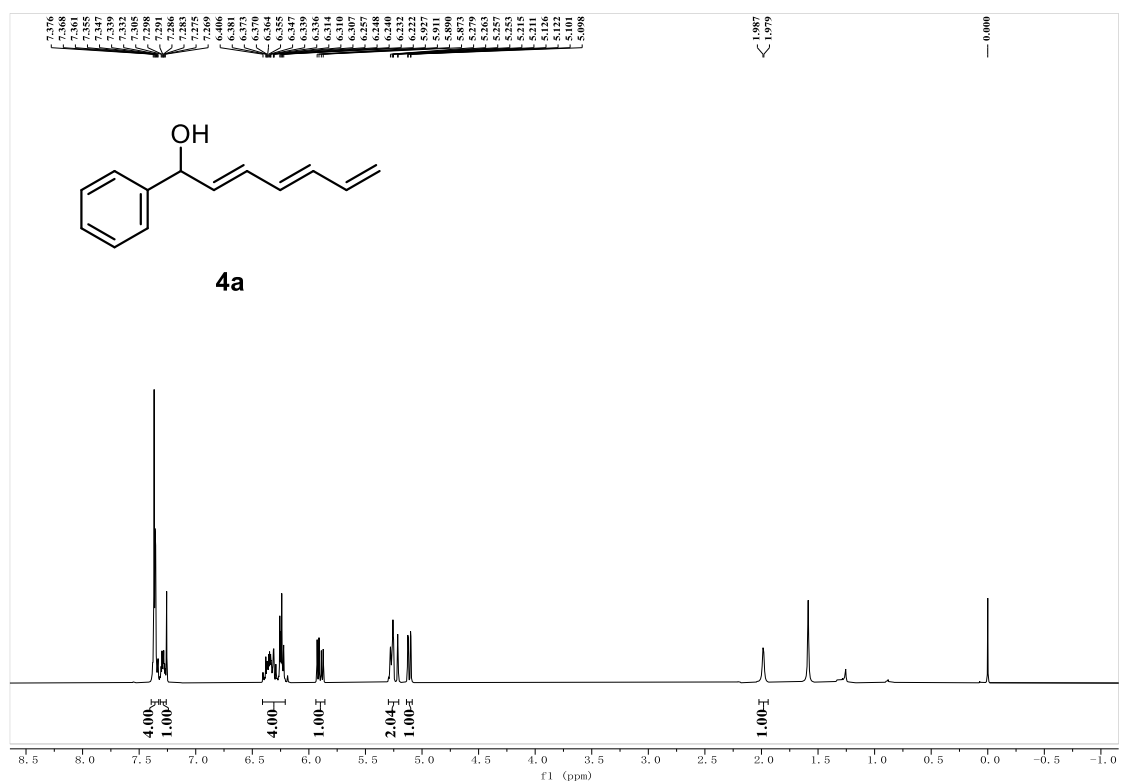

<sup>1</sup>H NMR (400 MHz, CDCl<sub>3</sub>) of **4a**

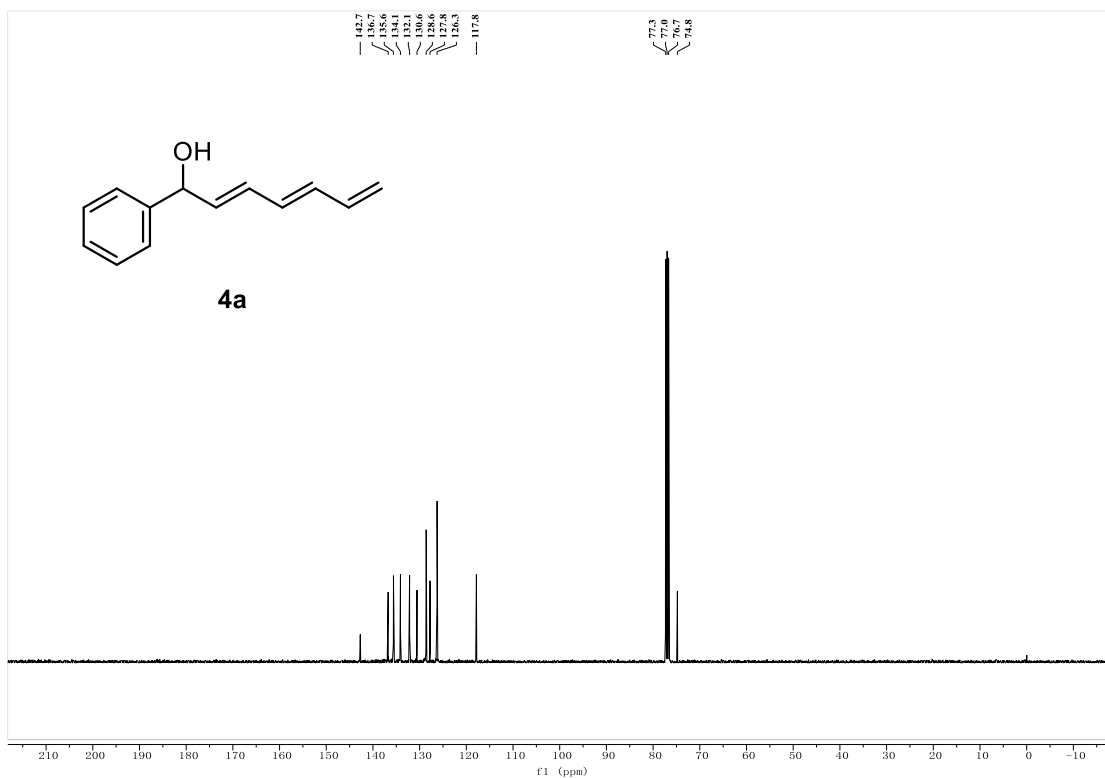

<sup>13</sup>C NMR (101 MHz, CDCl<sub>3</sub>) of **4a**

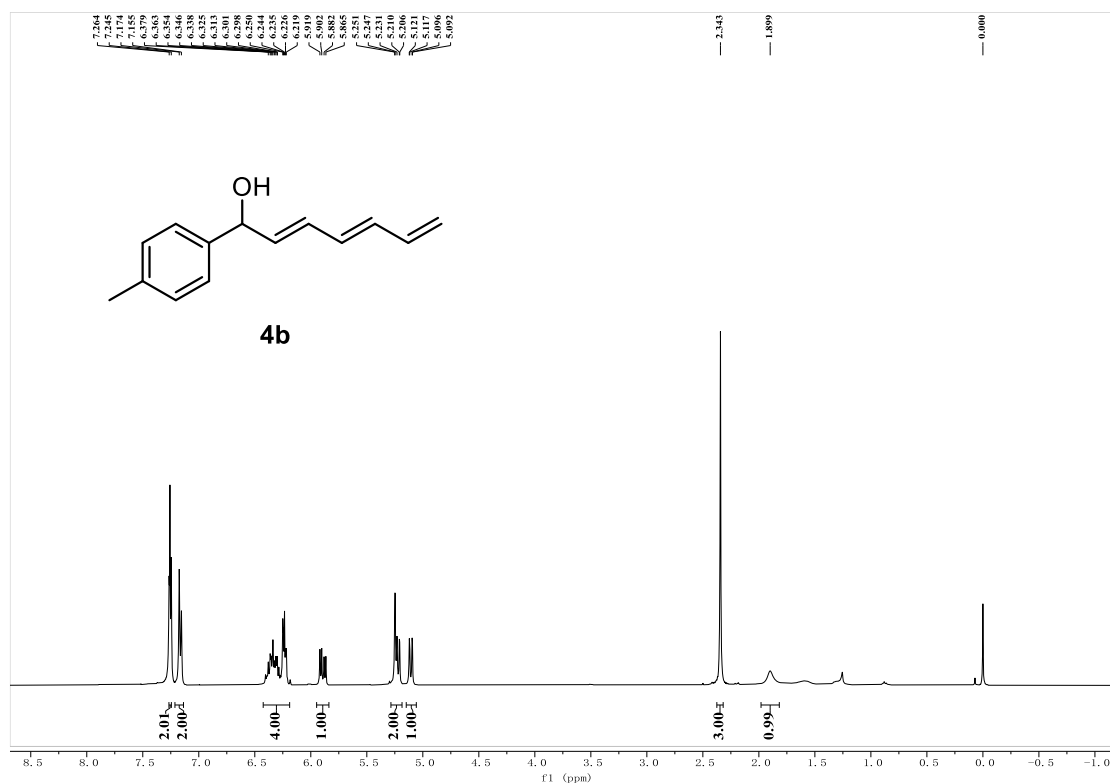

<sup>1</sup>H NMR (400 MHz, CDCl<sub>3</sub>) of **4b**

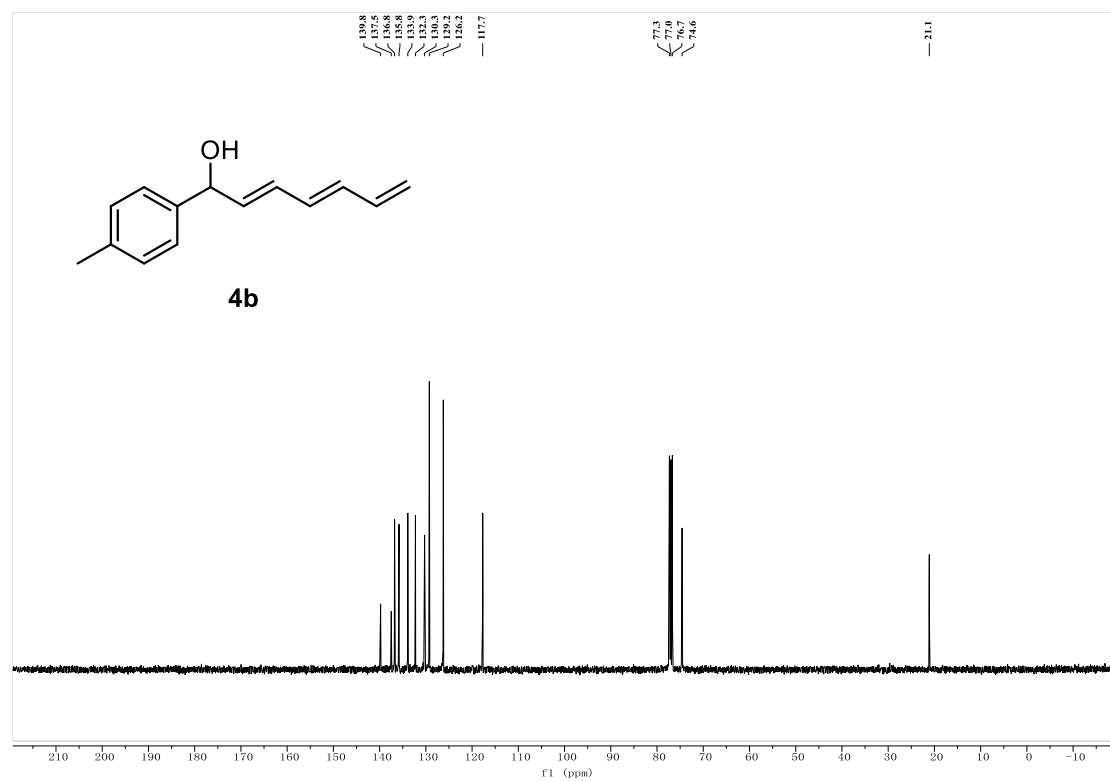

<sup>13</sup>C NMR (101 MHz, CDCl<sub>3</sub>) of **4b**

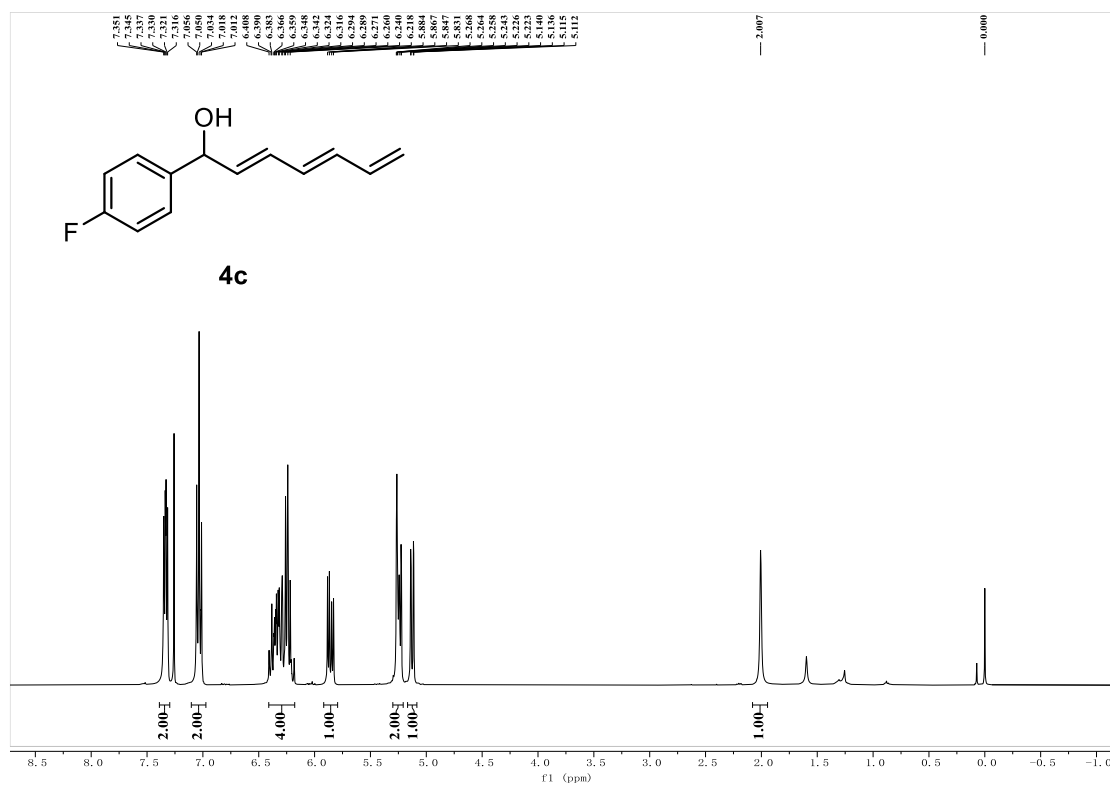

<sup>1</sup>H NMR (400 MHz, CDCl<sub>3</sub>) of **4c**

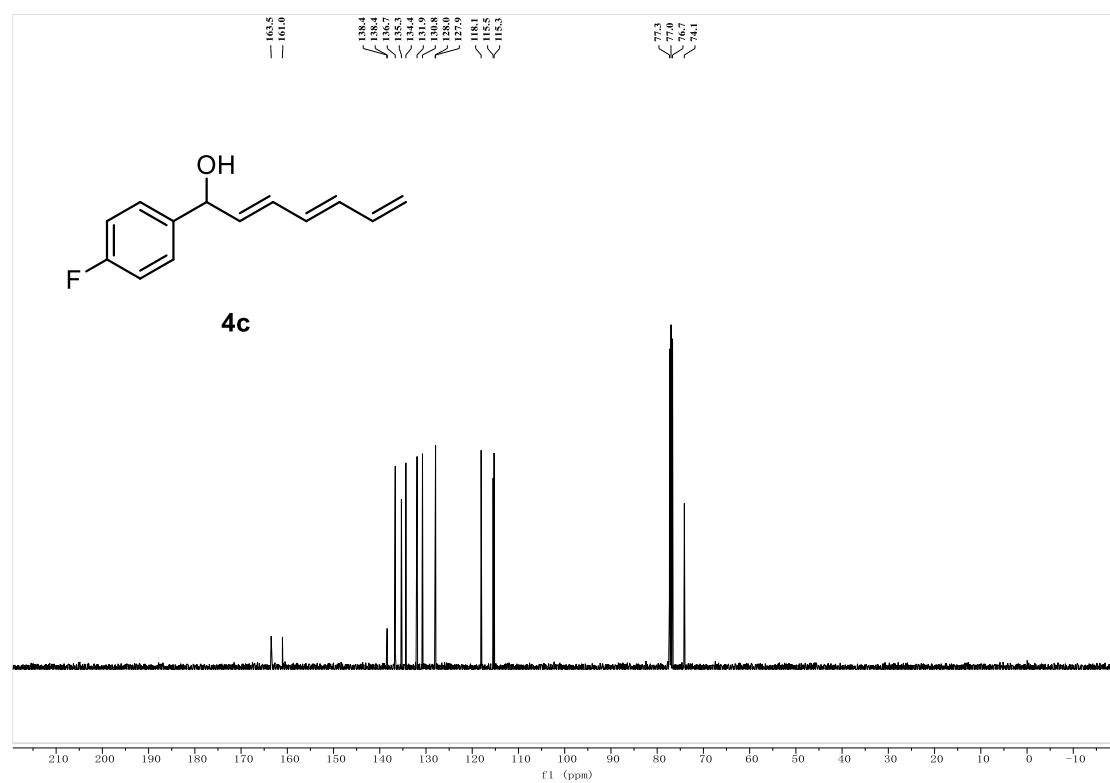

<sup>13</sup>C NMR (101 MHz, CDCl<sub>3</sub>) of **4c**



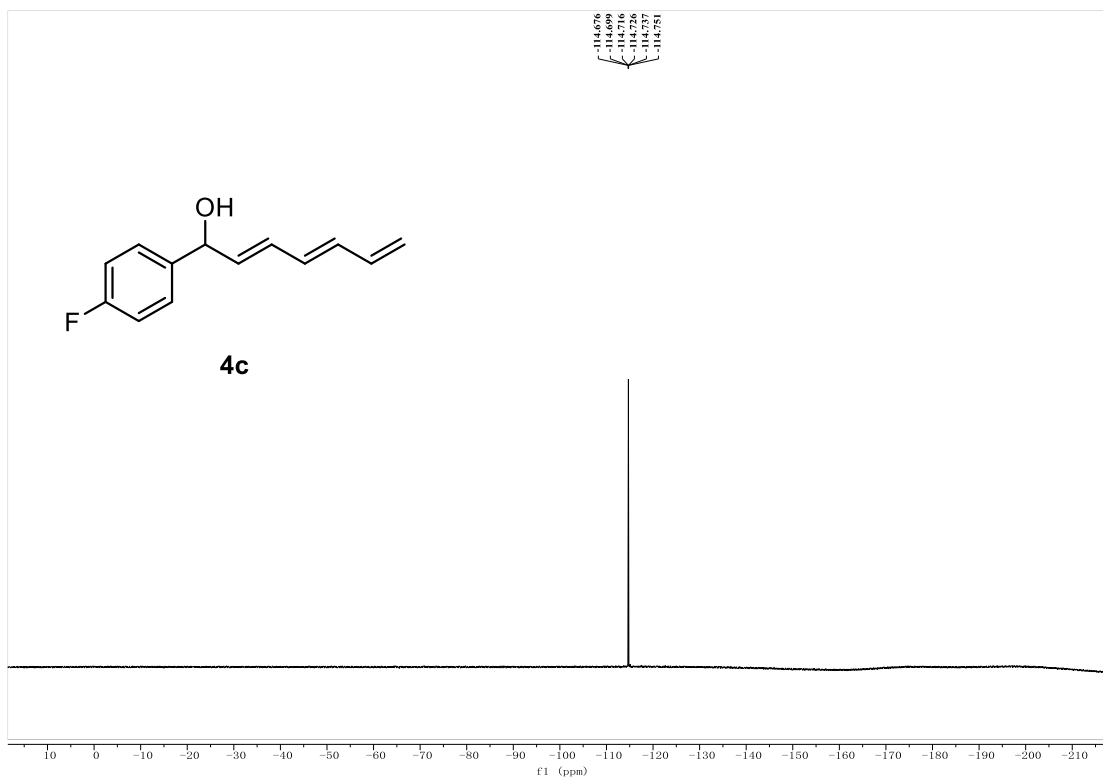

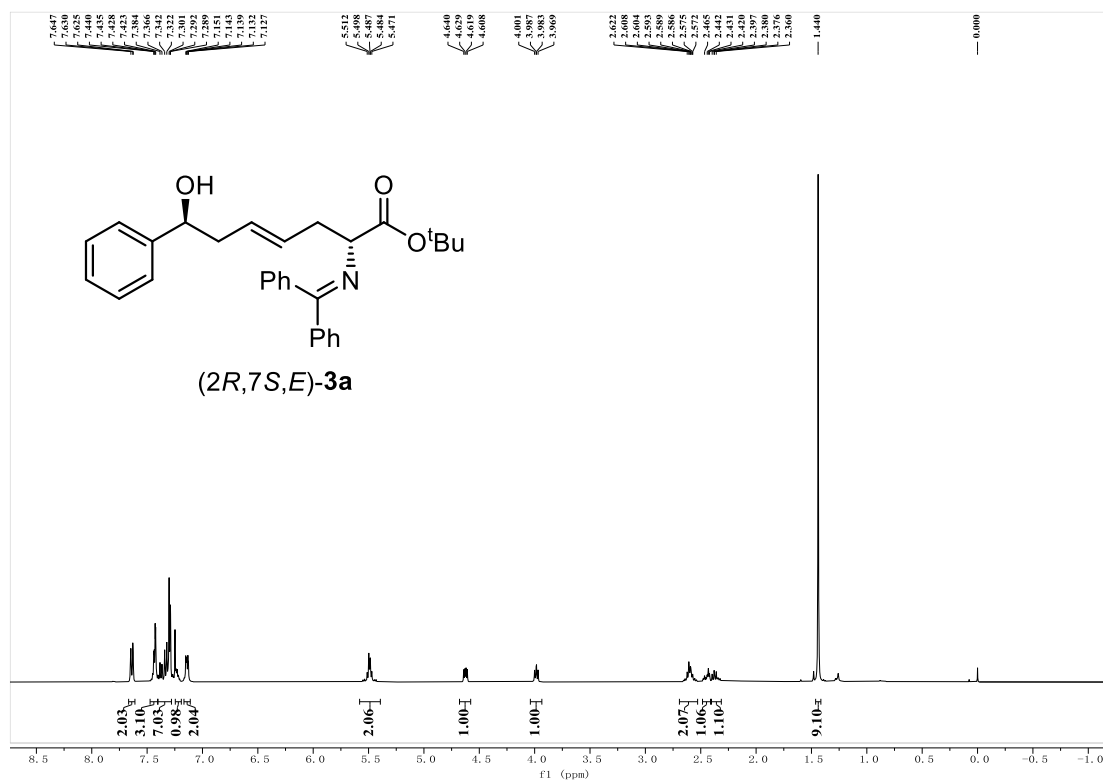

**<sup>1</sup>H NMR (400 MHz, CDCl<sub>3</sub>) of (2*R*,7*S*,*E*)-3a**

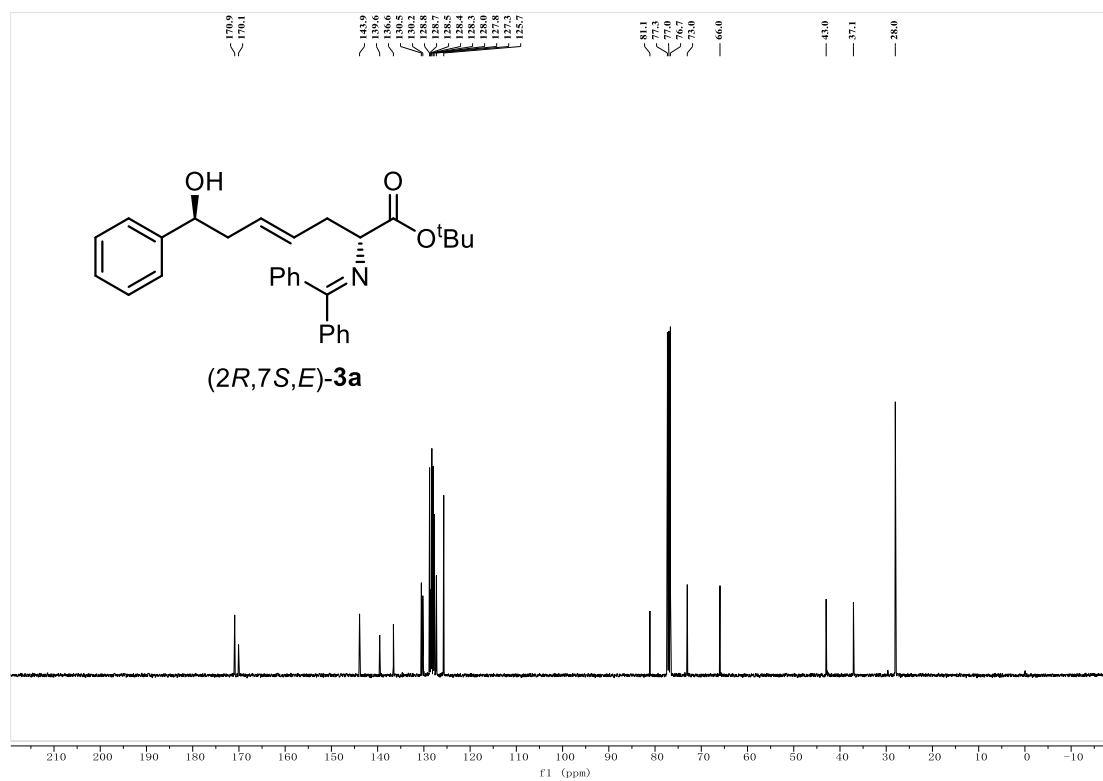

**<sup>13</sup>C NMR (101 MHz, CDCl<sub>3</sub>) of (2*R*,7*S*,*E*)-3a**

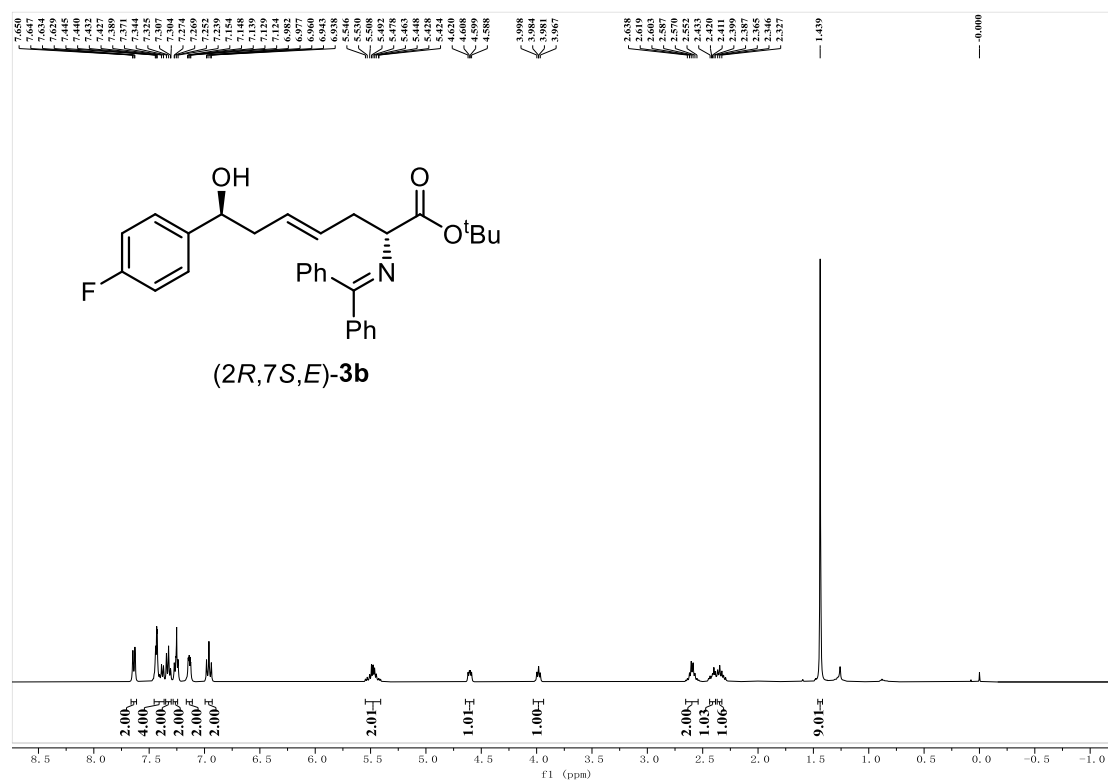

**<sup>1</sup>H NMR (400 MHz, CDCl<sub>3</sub>) of (2R,7S,E)-3b**

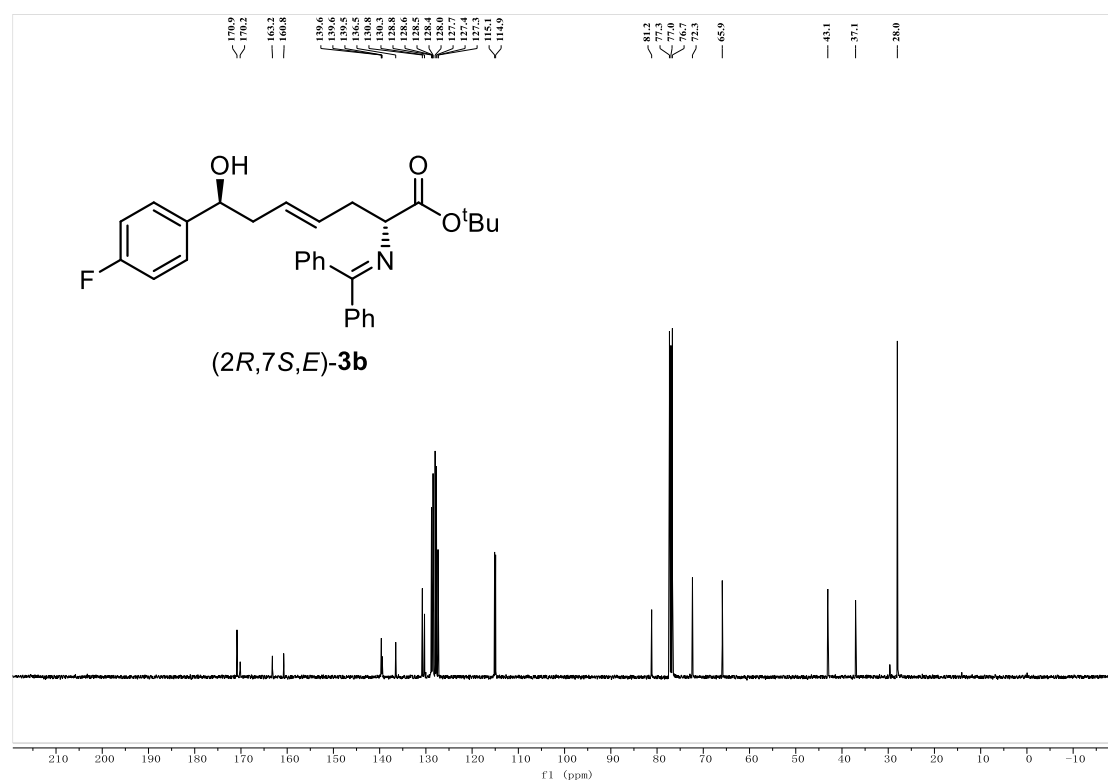

**<sup>13</sup>C NMR (101 MHz, CDCl<sub>3</sub>) of (2R,7S,E)-3b**

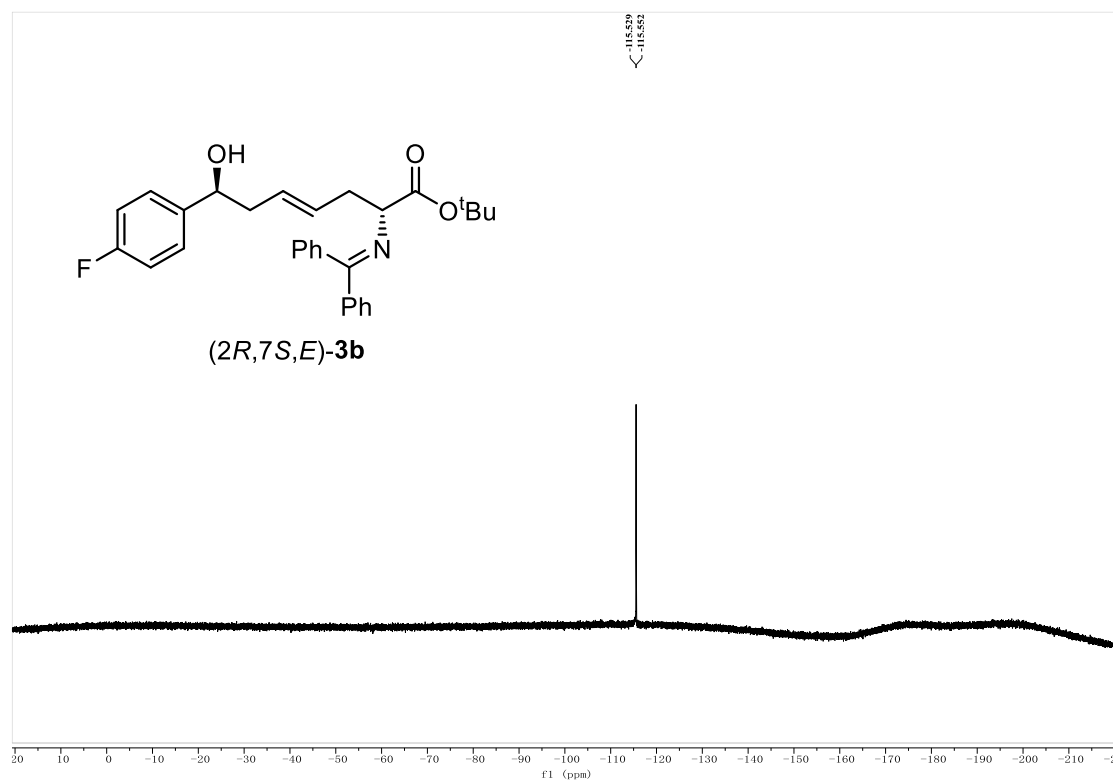

**<sup>19</sup>F NMR (376 MHz, CDCl<sub>3</sub>) of 3b**

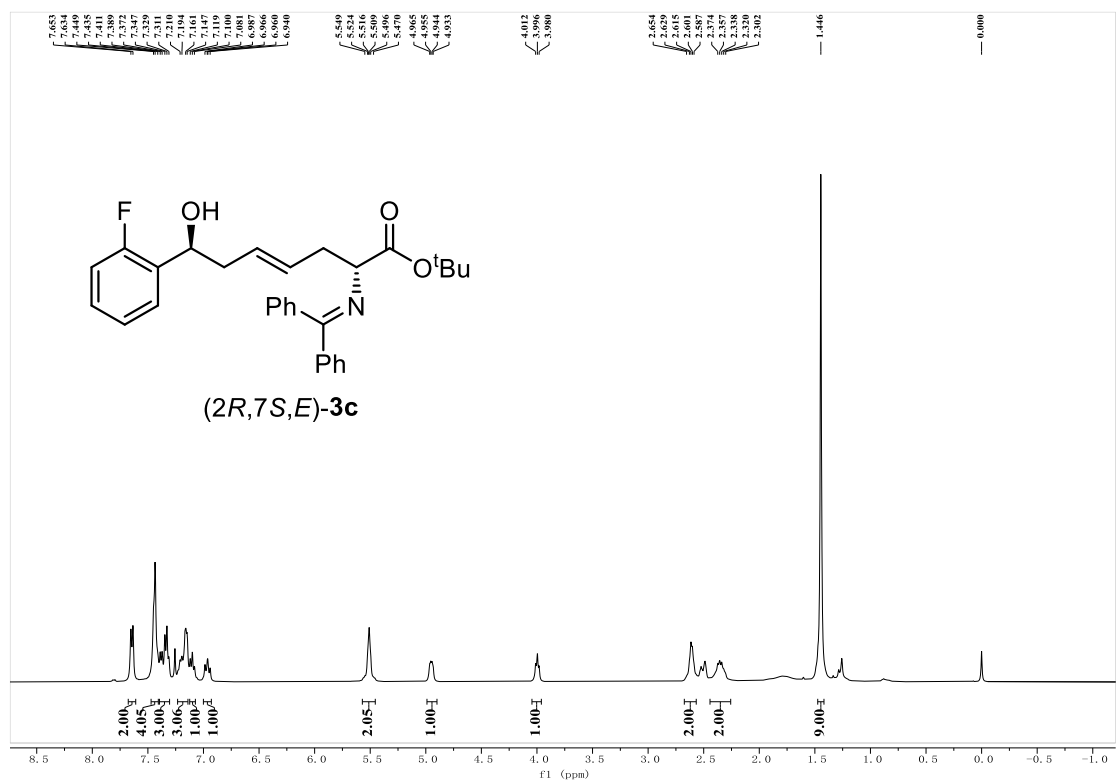

**<sup>1</sup>H NMR (400 MHz, CDCl<sub>3</sub>) of (2*R*,7*S*,*E*)-3c**

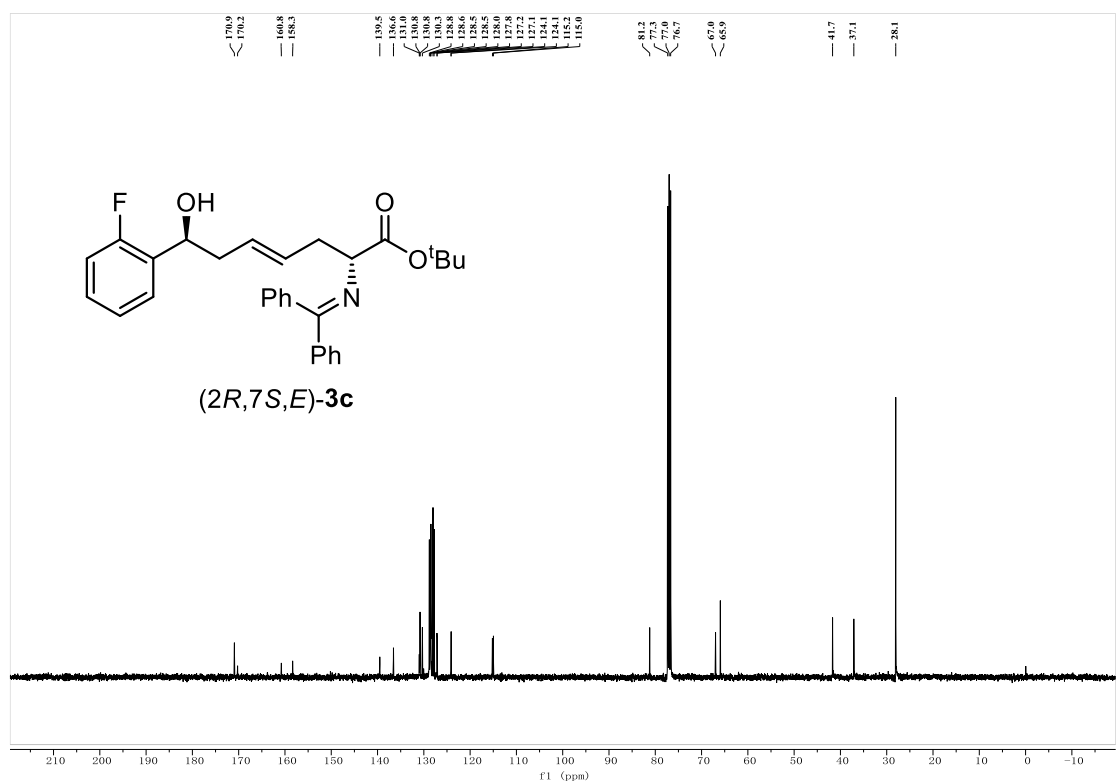

**<sup>13</sup>C NMR (101 MHz, CDCl<sub>3</sub>) of (2*R*,7*S*,*E*)-3c**

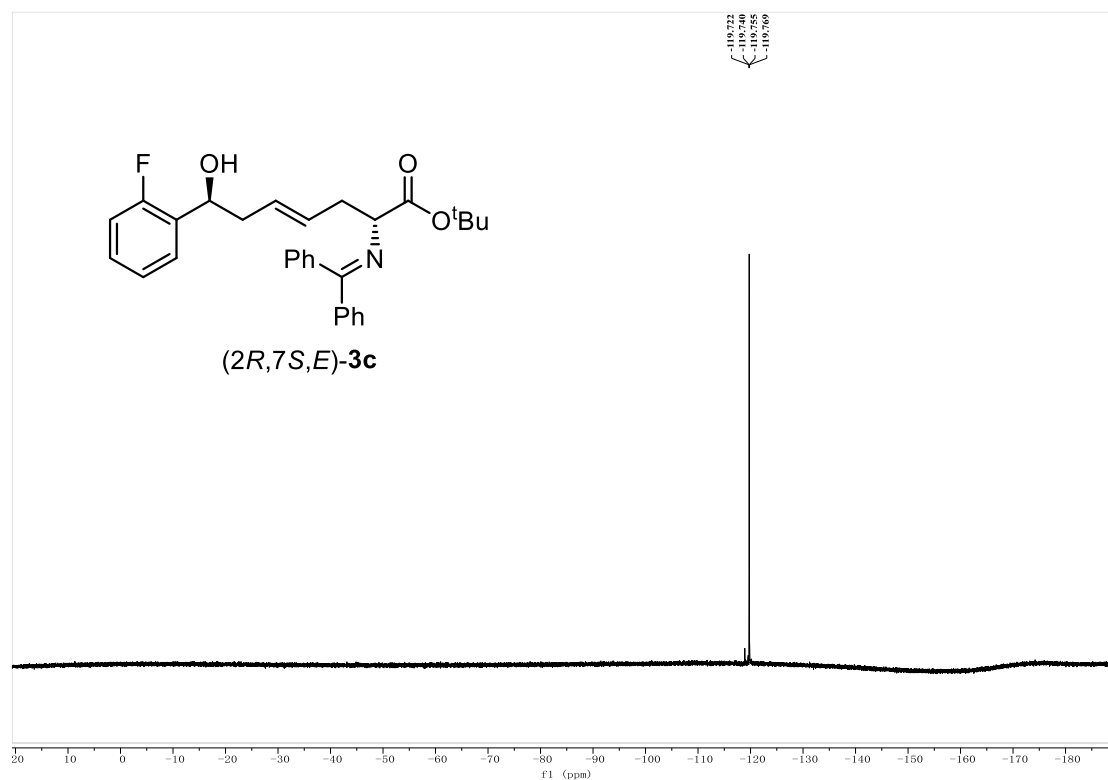

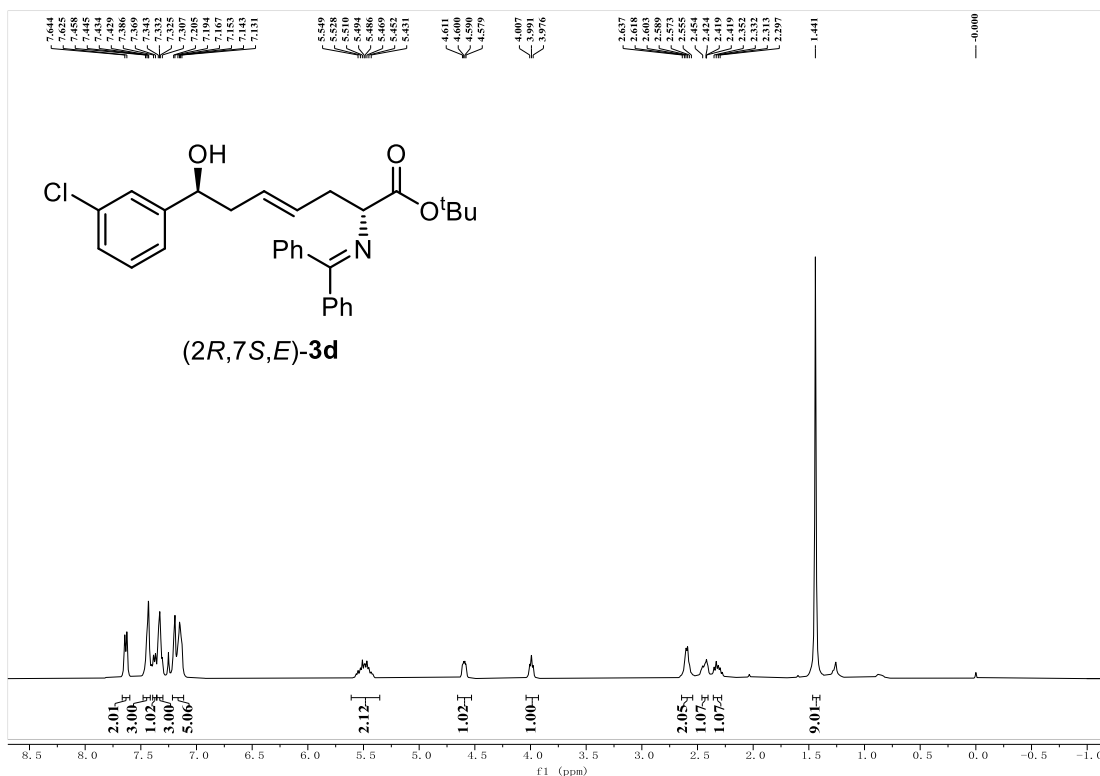

$^1\text{H}$  NMR (400 MHz,  $\text{CDCl}_3$ ) of **(2R,7S,E)-3d**

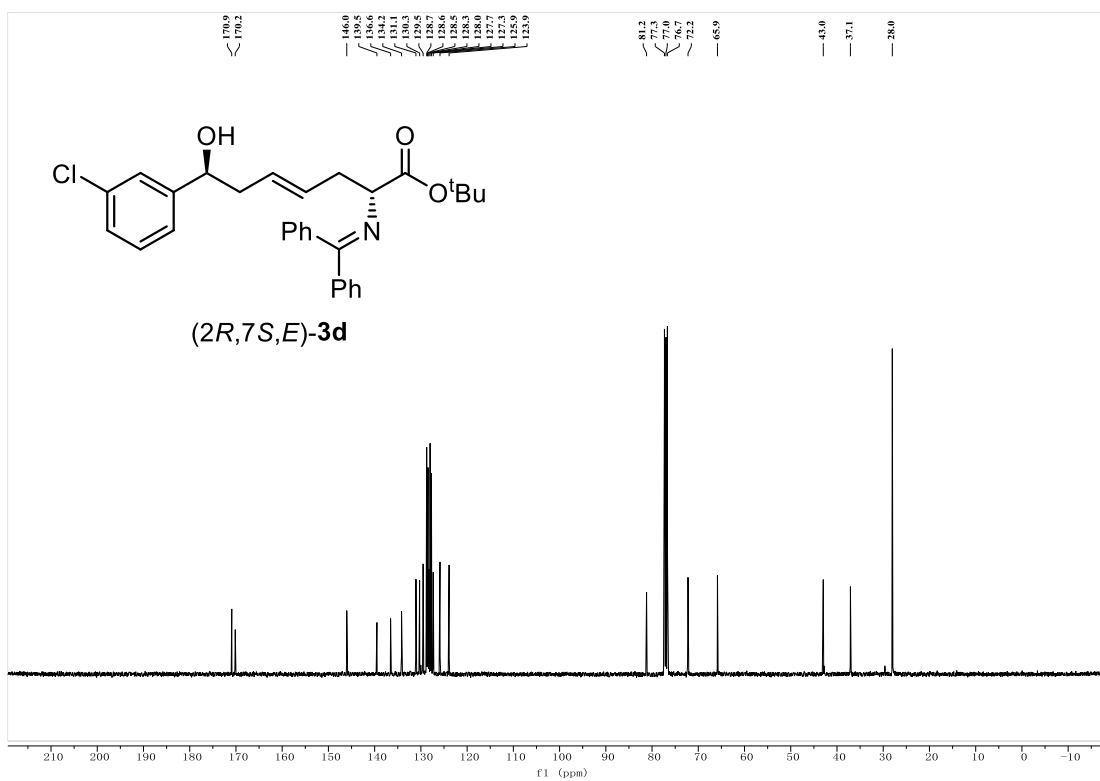

$^{13}\text{C}$  NMR (101 MHz,  $\text{CDCl}_3$ ) of **(2R,7S,E)-3d**

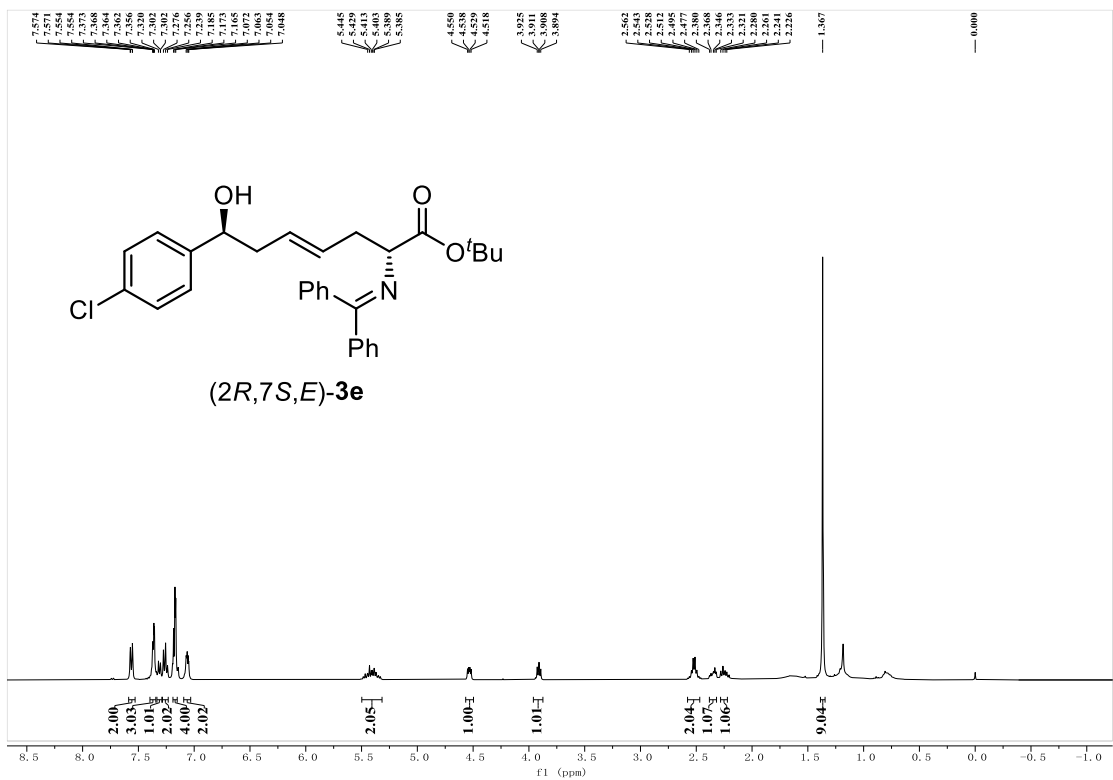

**<sup>1</sup>H NMR (400 MHz, CDCl<sub>3</sub>) of (2*R*,7*S*,*E*)-3e**

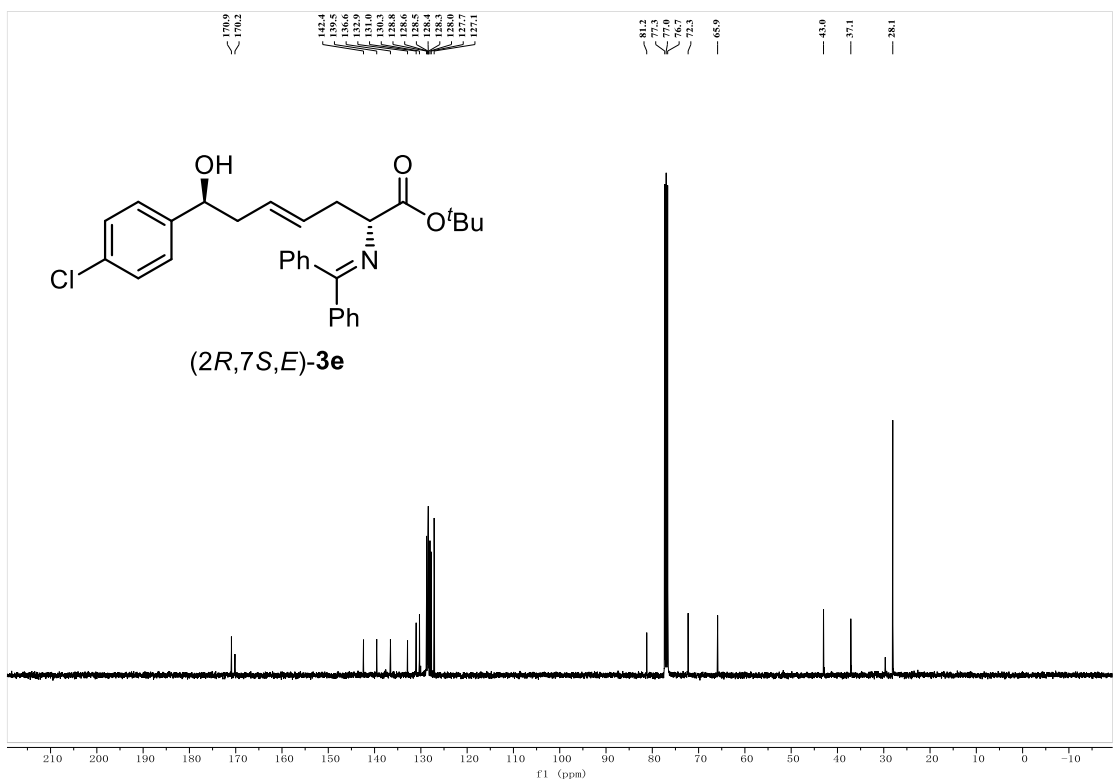

**<sup>13</sup>C NMR (101 MHz, CDCl<sub>3</sub>) of (2*R*,7*S*,*E*)-3e**



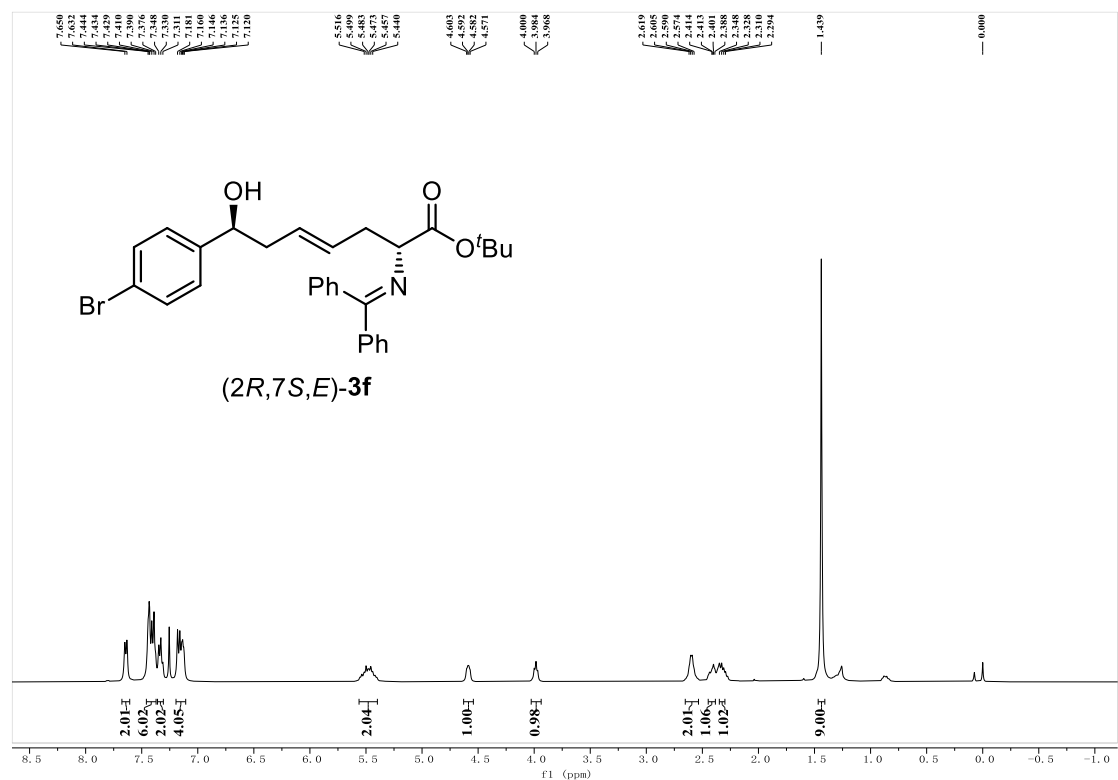

$^1\text{H NMR}$  (400 MHz,  $\text{CDCl}_3$ ) of (2R,7S,E)-3f

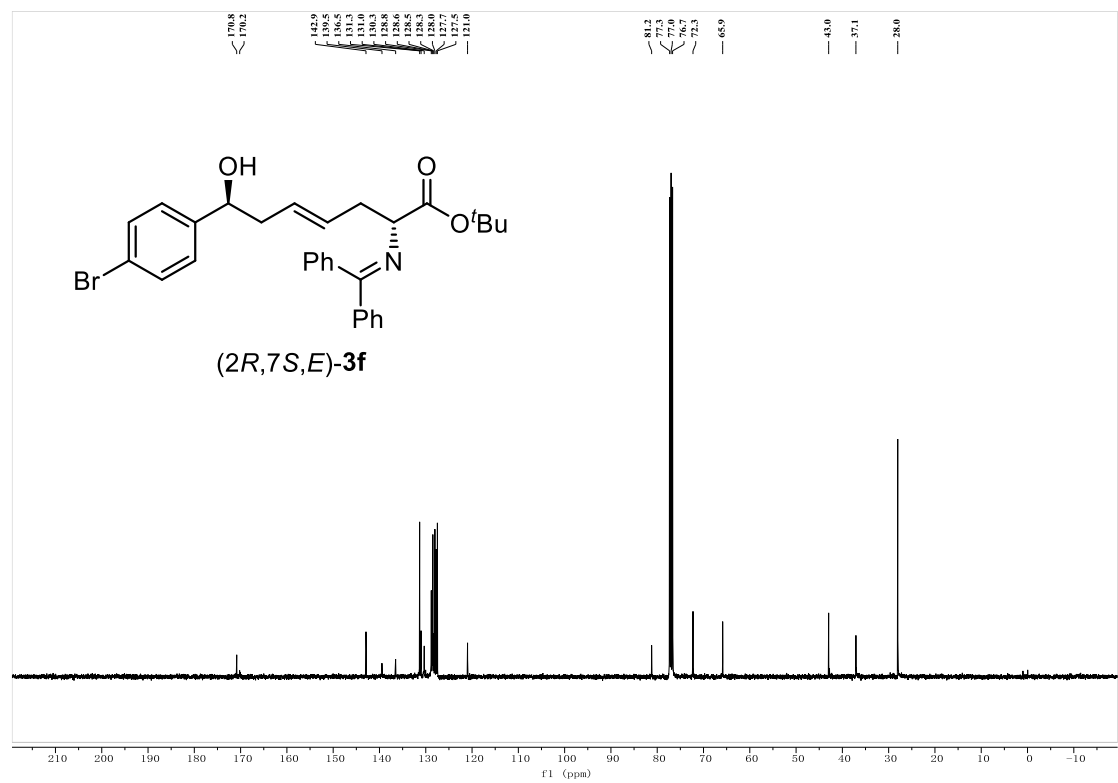

$^{13}\text{C NMR}$  (101 MHz,  $\text{CDCl}_3$ ) of (2R,7S,E)-3f

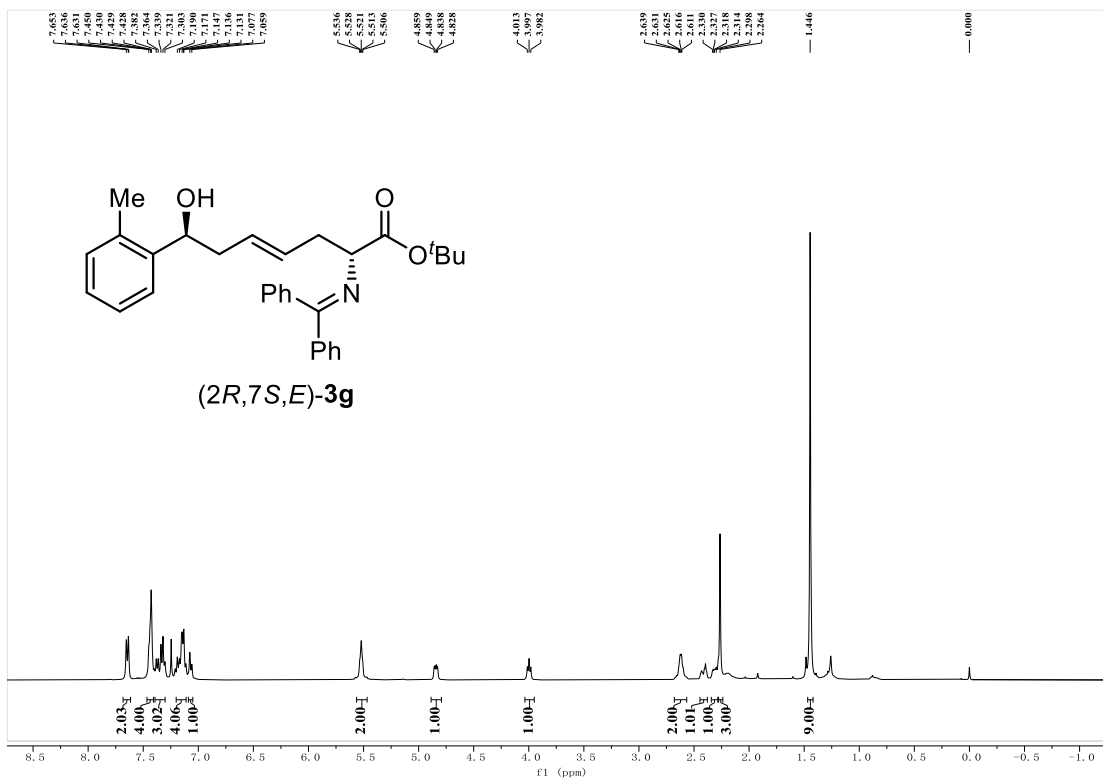

$^1\text{H NMR}$  (400 MHz,  $\text{CDCl}_3$ ) of (2R,7S,E)-3g

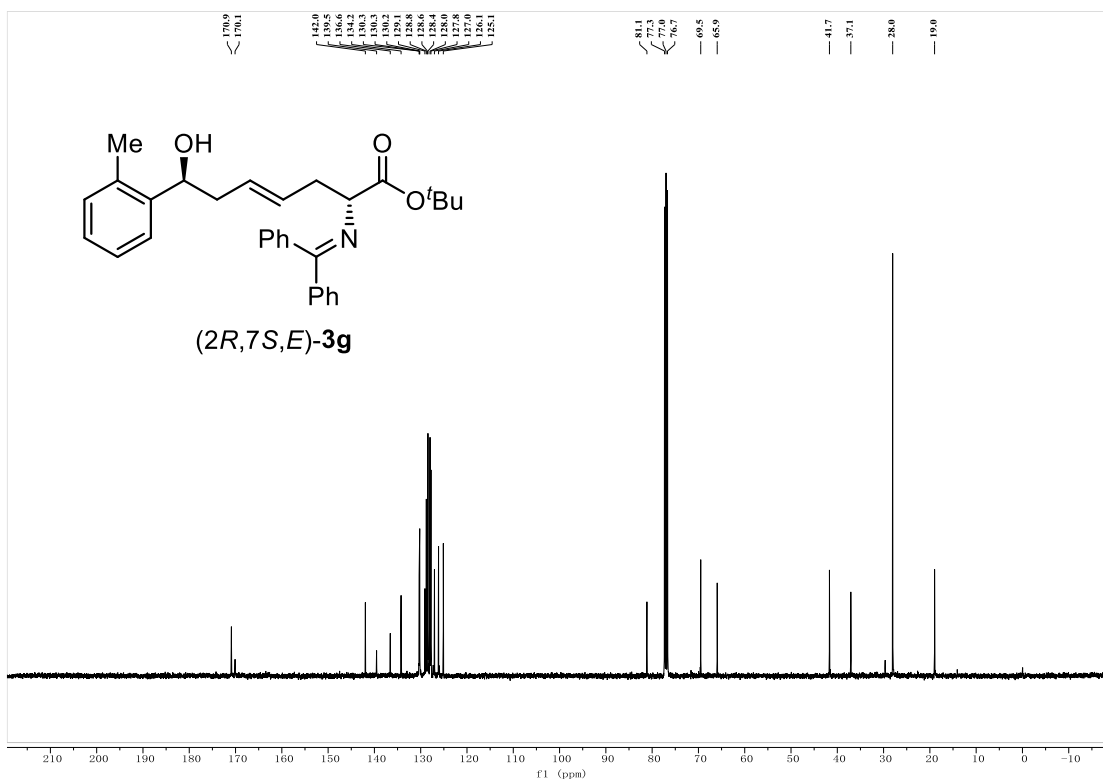

$^{13}\text{C NMR}$  (101 MHz,  $\text{CDCl}_3$ ) of (2R,7S,E)-3g

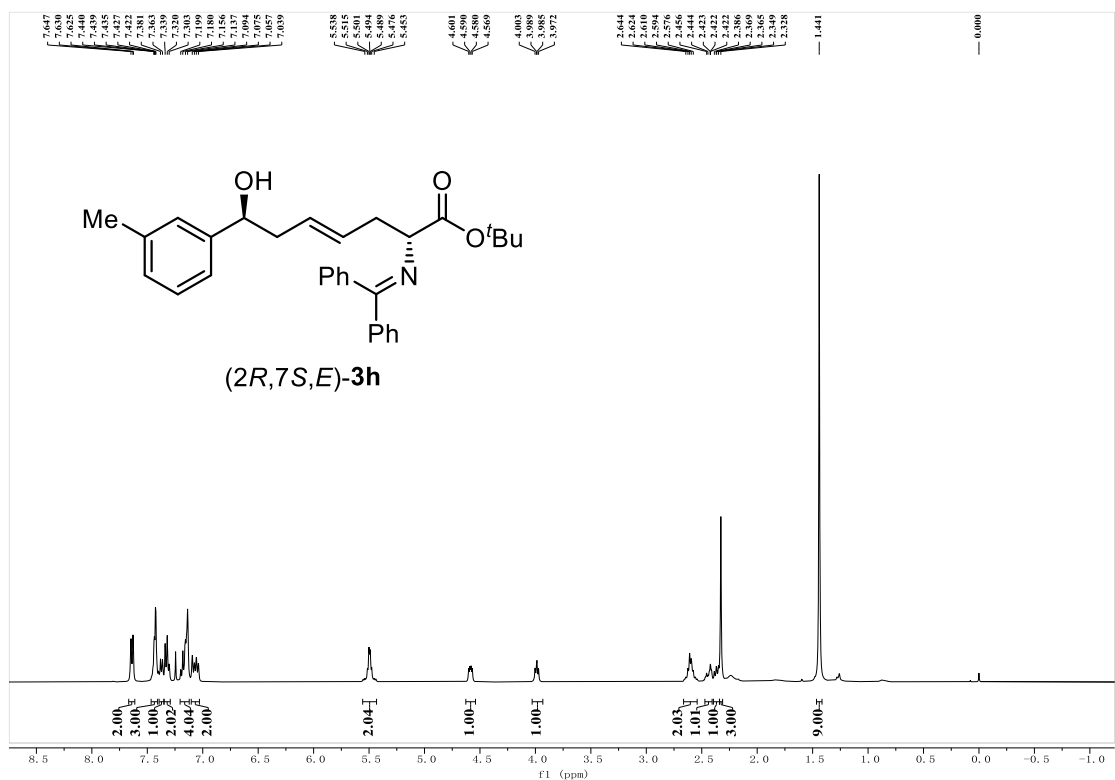

$^1\text{H}$  NMR (400 MHz,  $\text{CDCl}_3$ ) of **(2R,7S,E)-3h**

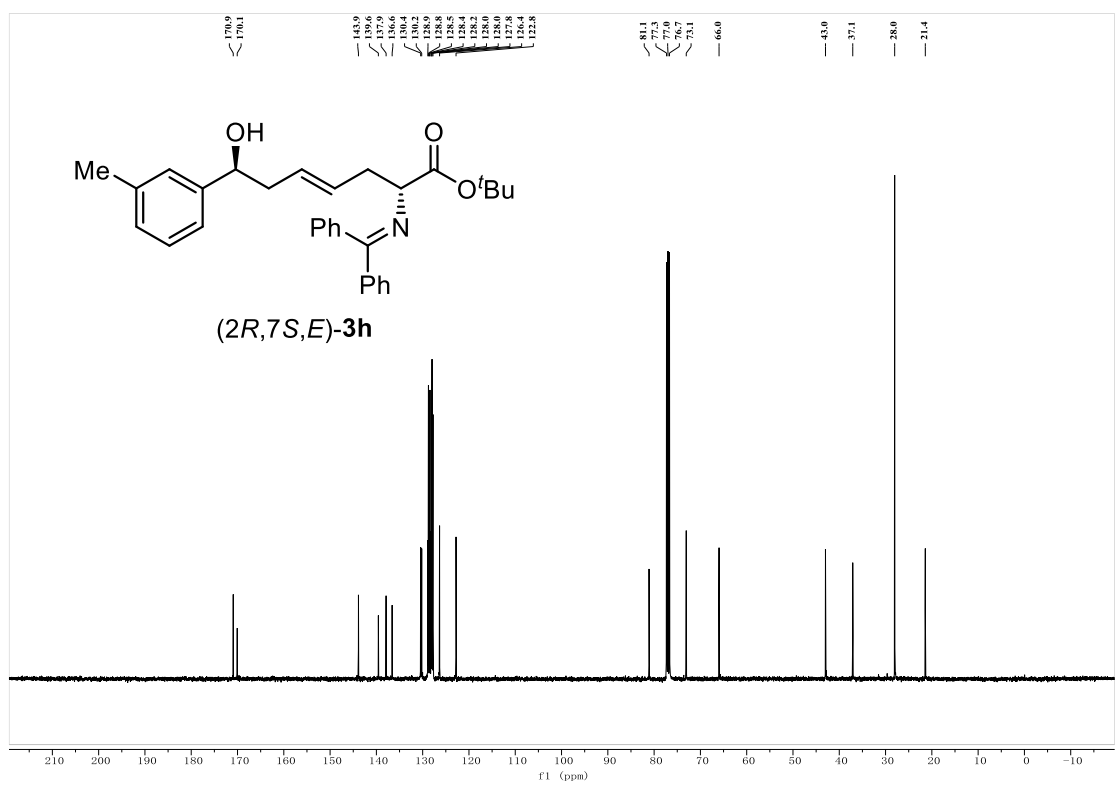

$^{13}\text{C}$  NMR (101 MHz,  $\text{CDCl}_3$ ) of **(2R,7S,E)-3h**

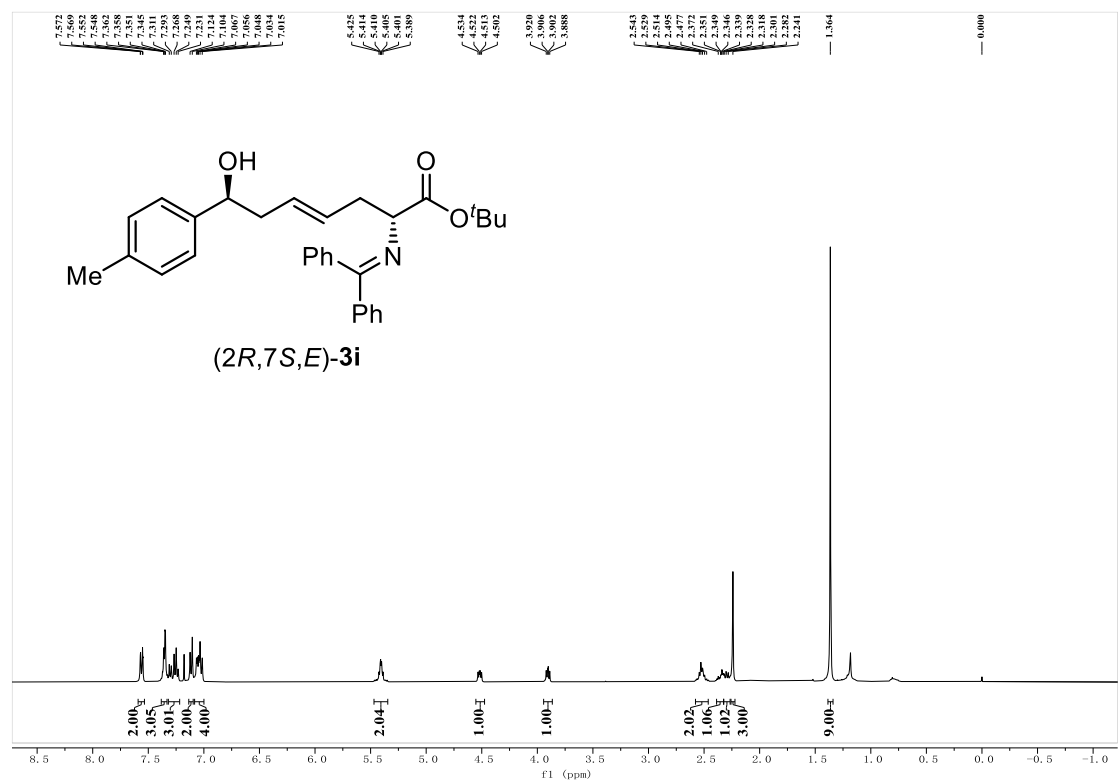

**<sup>1</sup>H NMR (400 MHz, CDCl<sub>3</sub>) of (2*R*,7*S*,*E*)-3i**

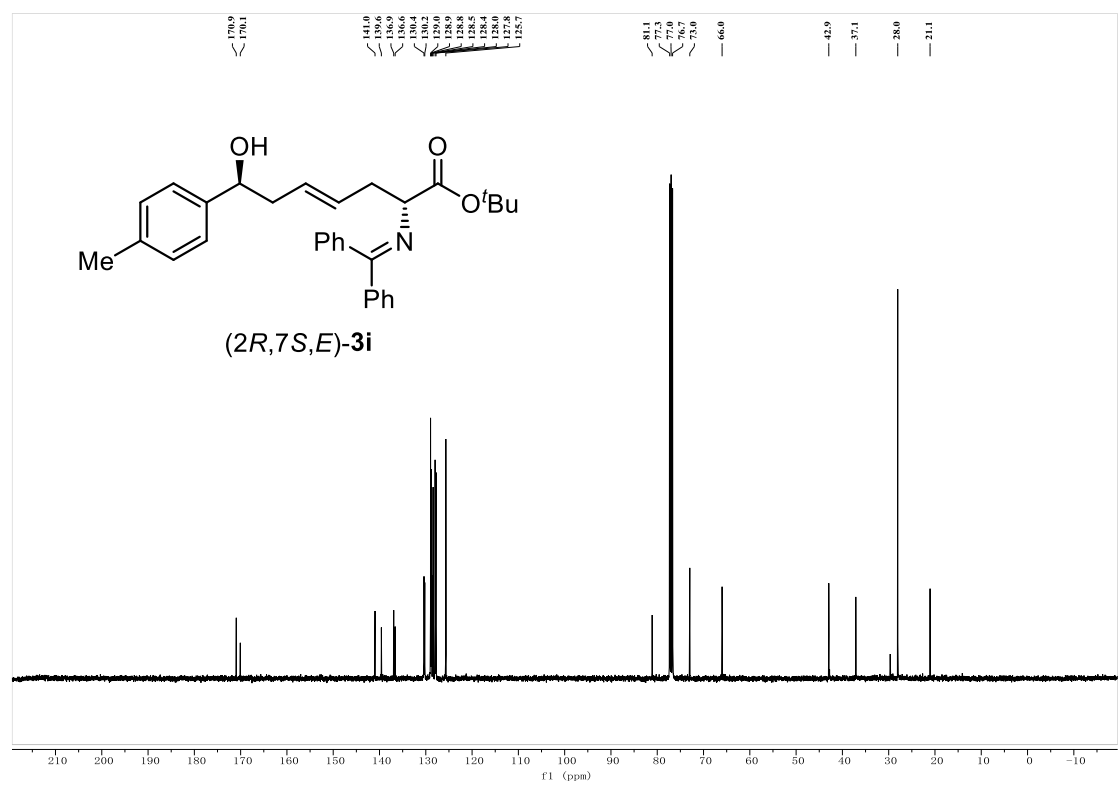

**<sup>13</sup>C NMR (101 MHz, CDCl<sub>3</sub>) of (2*R*,7*S*,*E*)-3i**

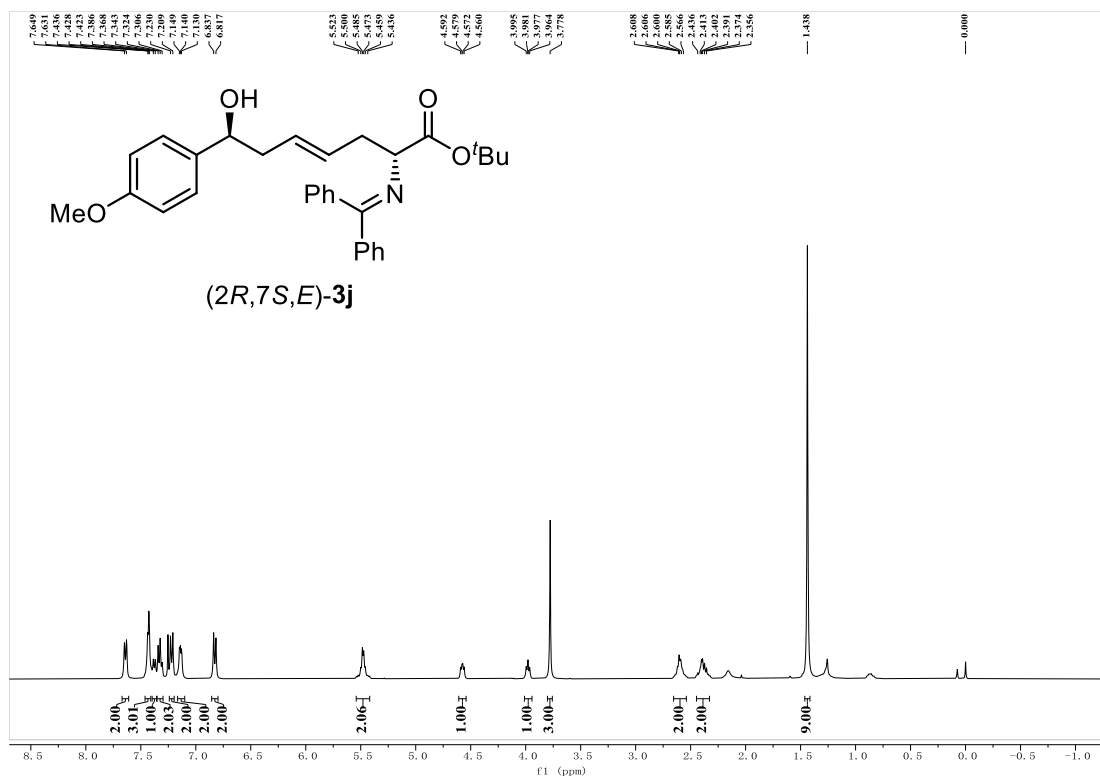

**<sup>1</sup>H NMR (400 MHz, CDCl<sub>3</sub>) of (2*R*,7*S*,*E*)-3j**

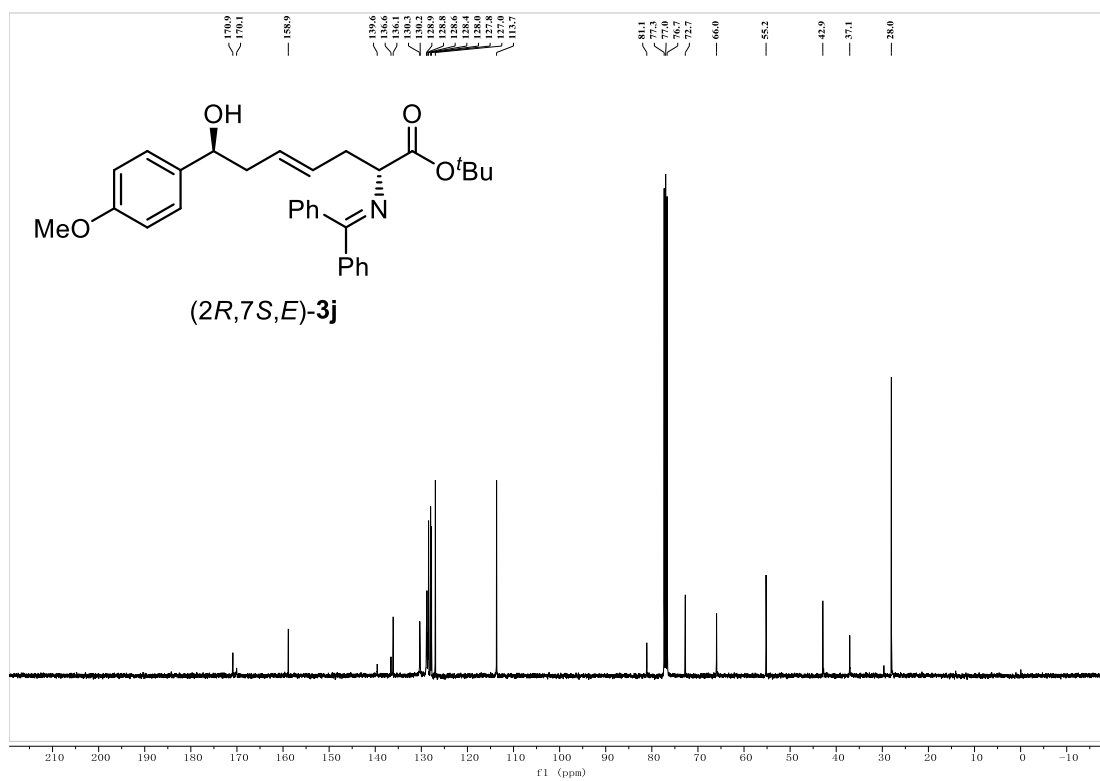

**<sup>13</sup>C NMR (101 MHz, CDCl<sub>3</sub>) of (2*R*,7*S*,*E*)-3j**

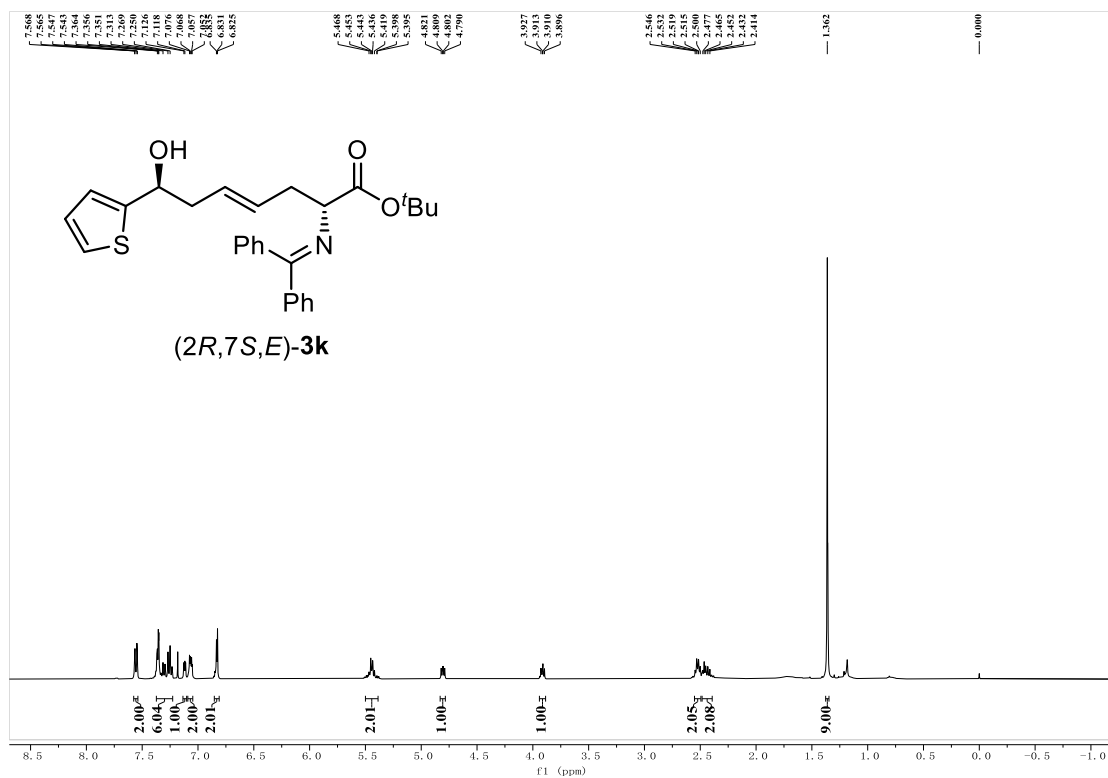

**<sup>1</sup>H NMR (400 MHz, CDCl<sub>3</sub>) of (2*R*,7*S*,*E*)-3k**

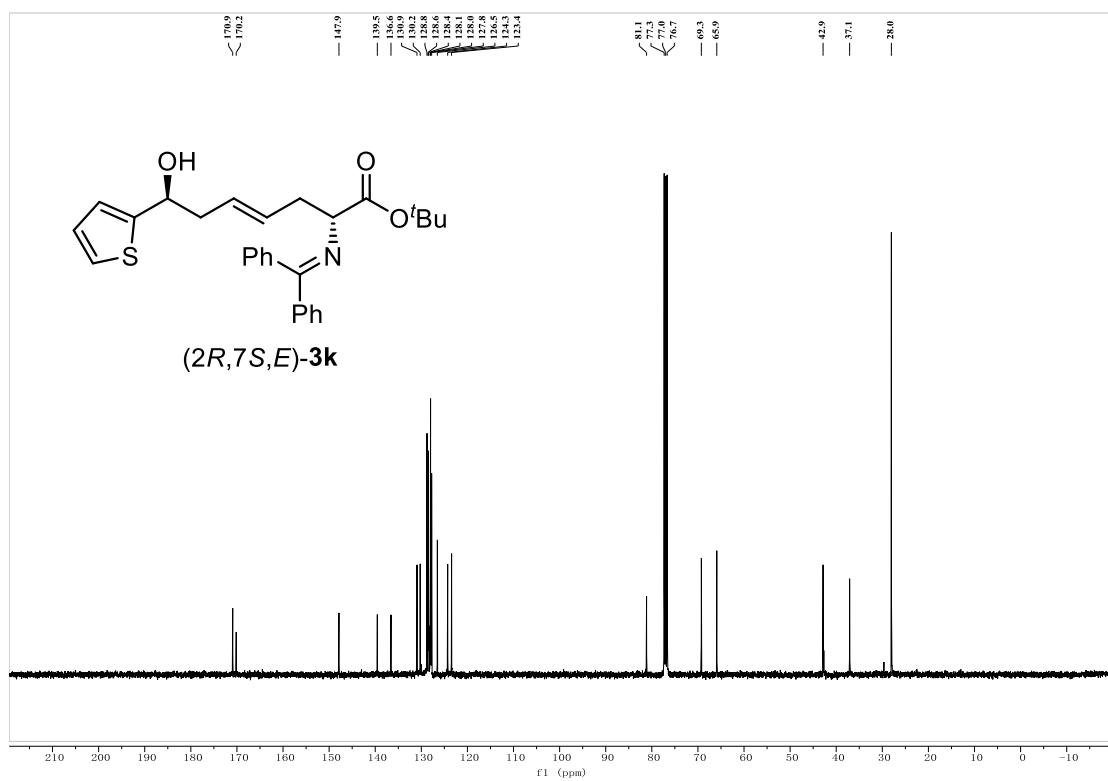

**<sup>13</sup>C NMR (101 MHz, CDCl<sub>3</sub>) of (2*R*,7*S*,*E*)-3k**



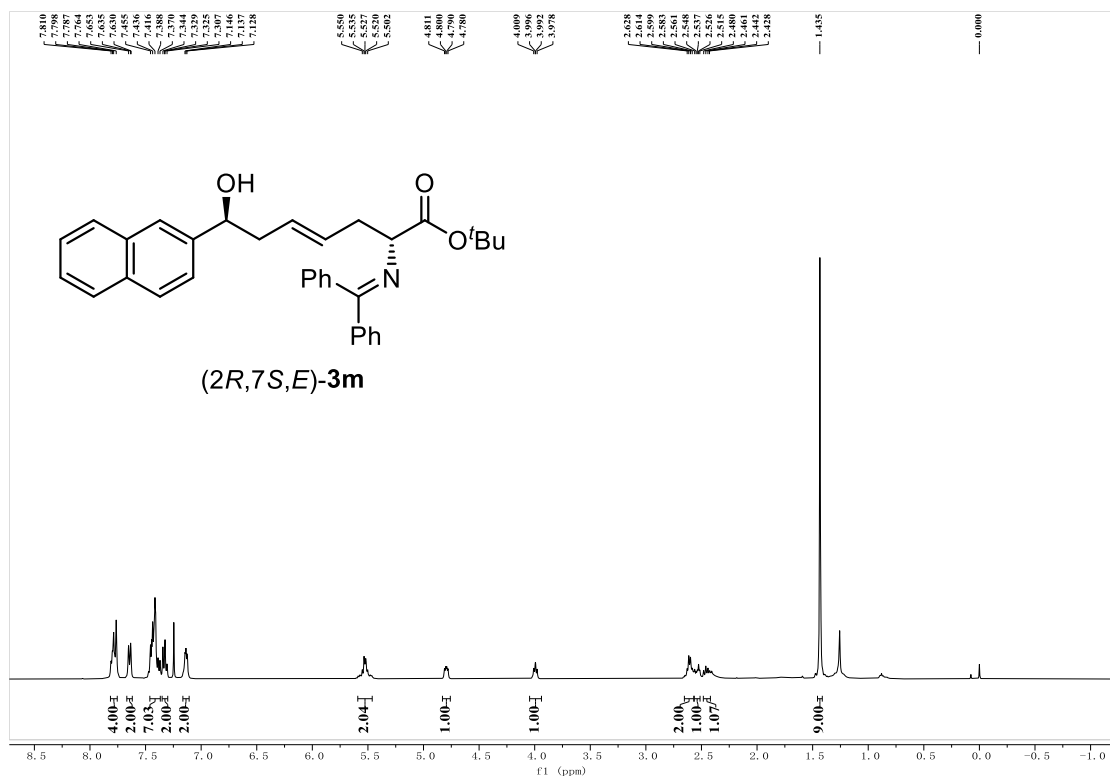

**<sup>1</sup>H NMR (400 MHz, CDCl<sub>3</sub>) of (2R,7S,E)-3m**

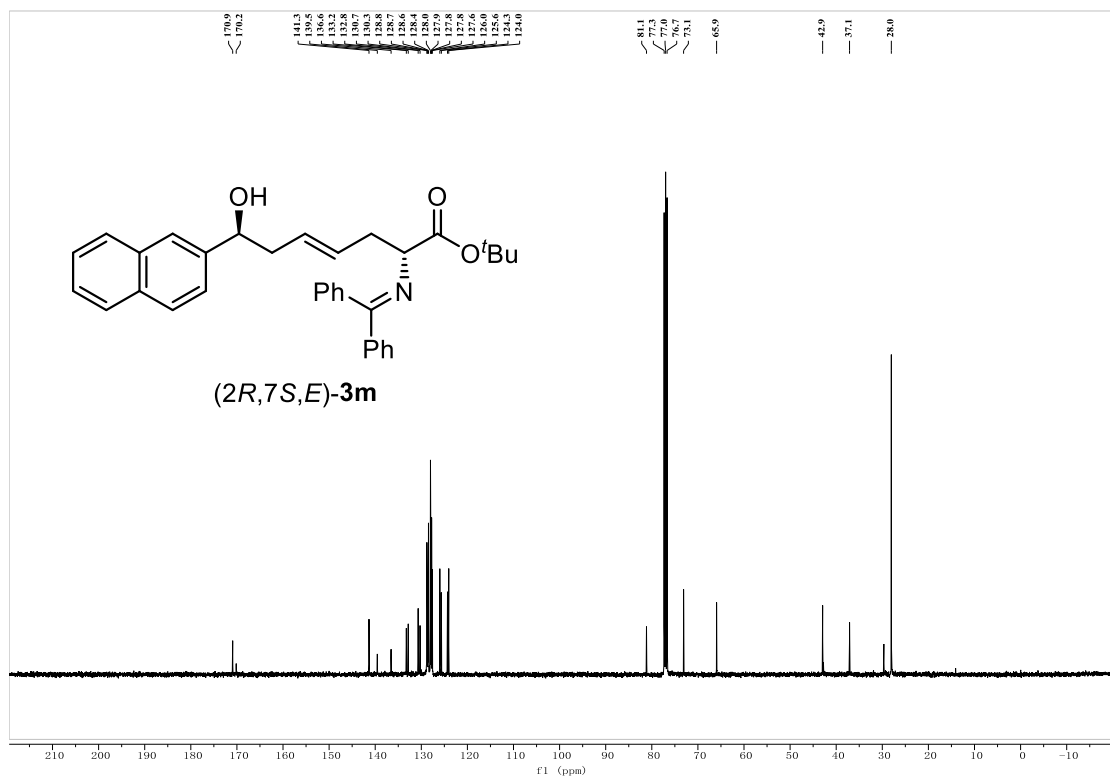

**<sup>13</sup>C NMR (101 MHz, CDCl<sub>3</sub>) of (2R,7S,E)-3m**



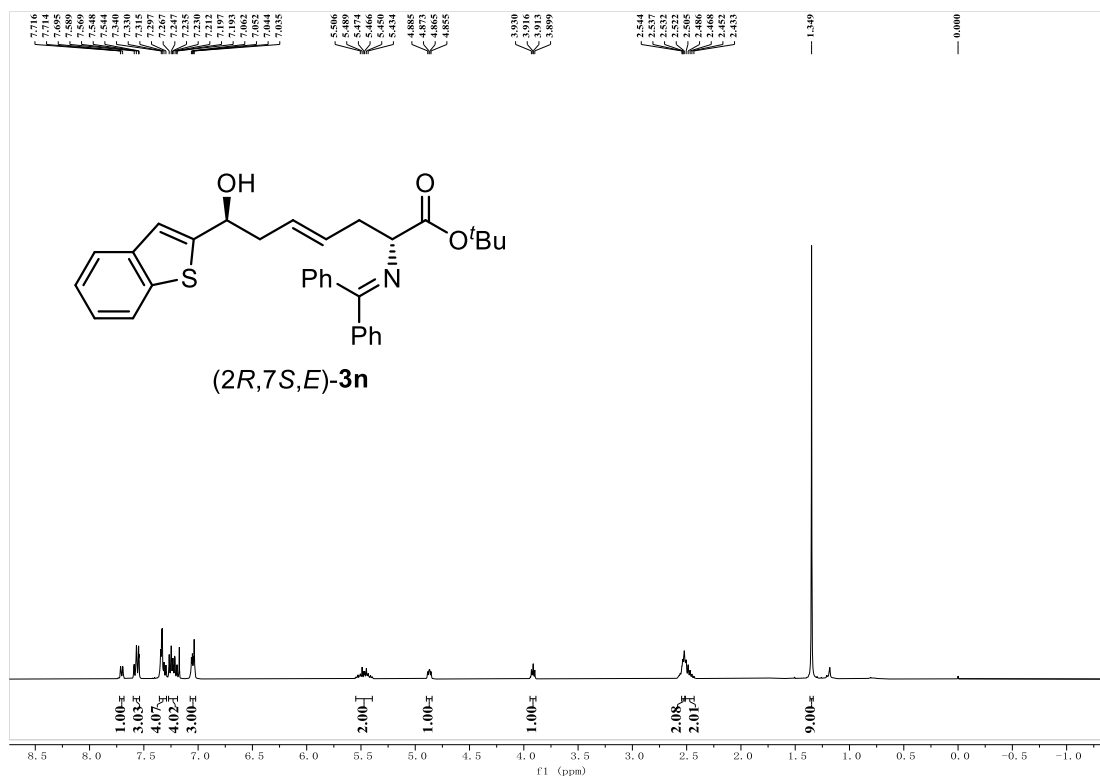

**<sup>1</sup>H NMR (400 MHz, CDCl<sub>3</sub>) of (2R,7S,E)-3n**

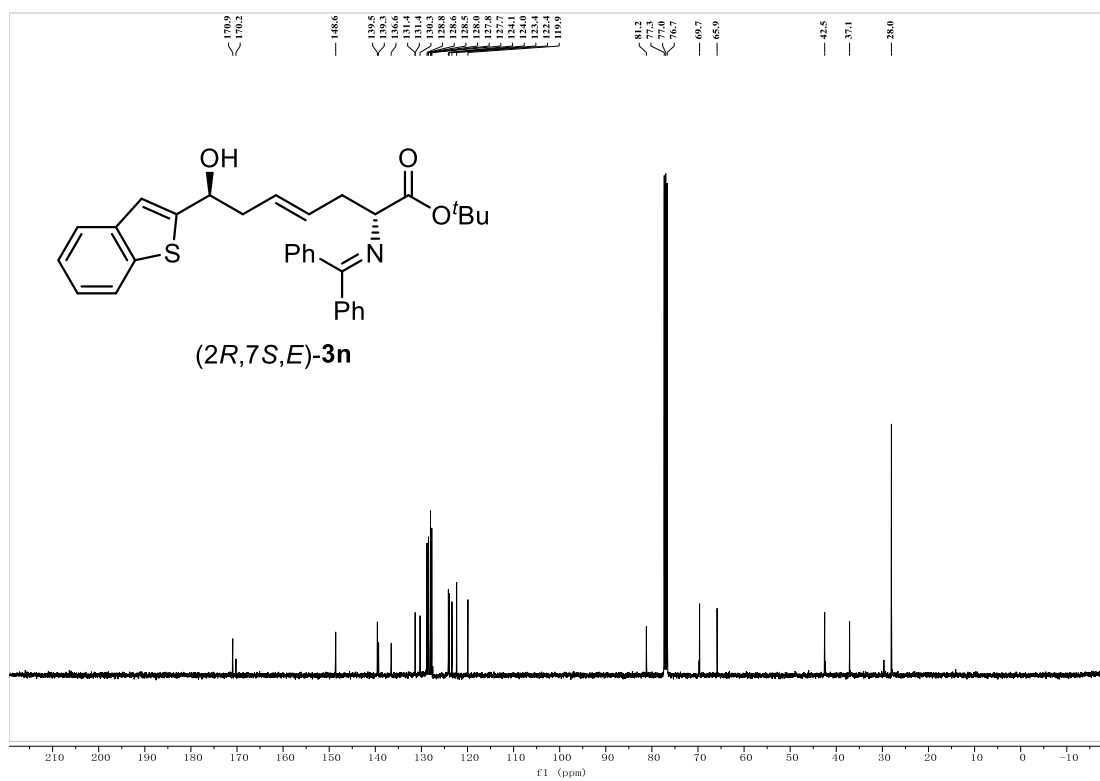

**<sup>13</sup>C NMR (101 MHz, CDCl<sub>3</sub>) of (2R,7S,E)-3n**

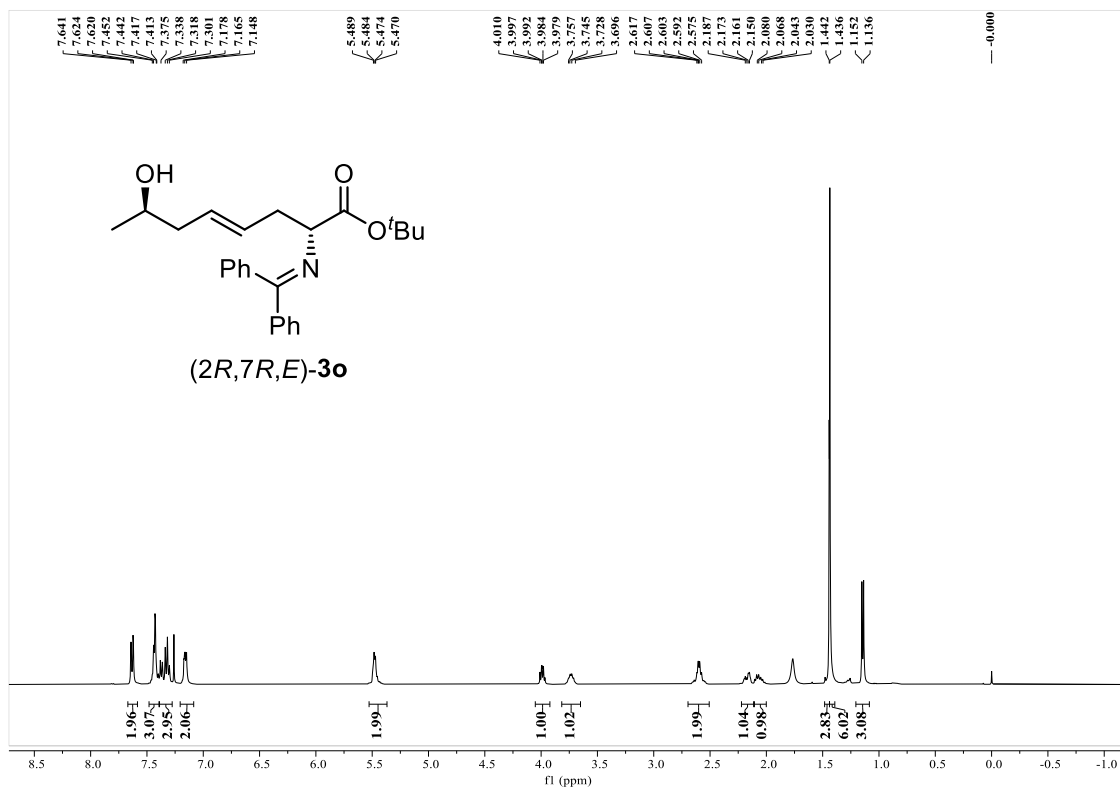

**<sup>1</sup>H NMR (400 MHz, CDCl<sub>3</sub>) of (2R,7R,E)-3o**

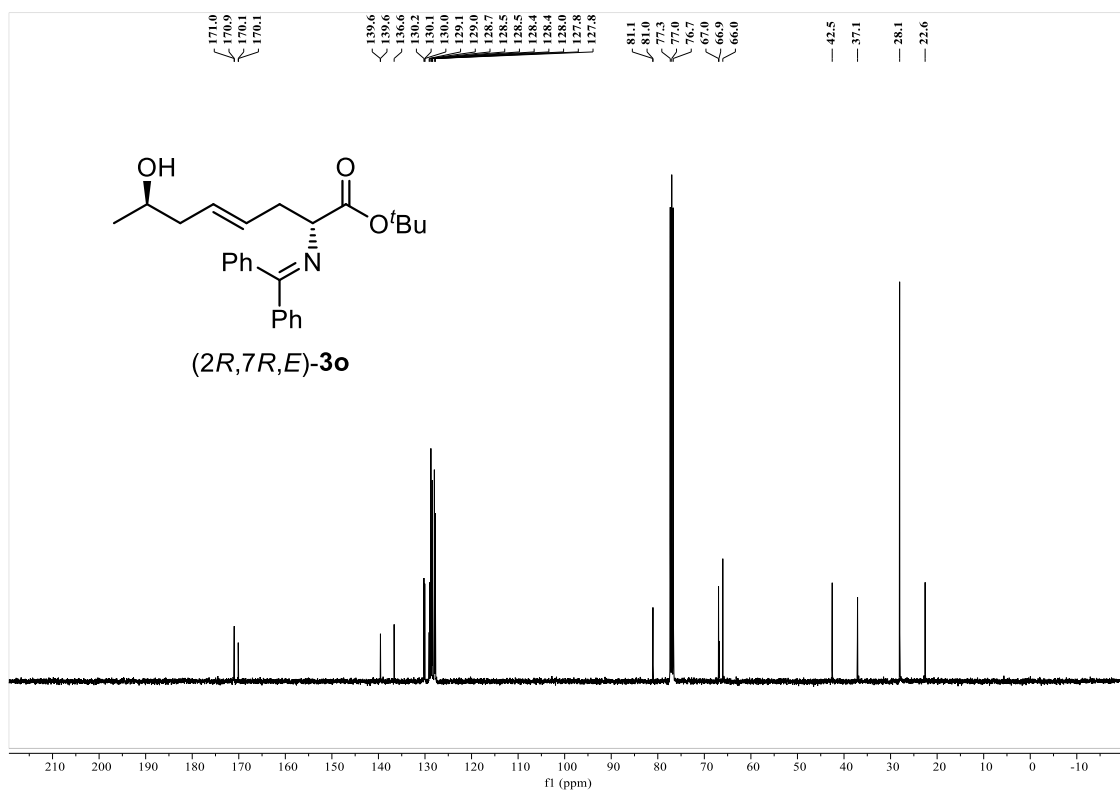

**<sup>13</sup>C NMR (101 MHz, CDCl<sub>3</sub>) of (2R,7R,E)-3o**

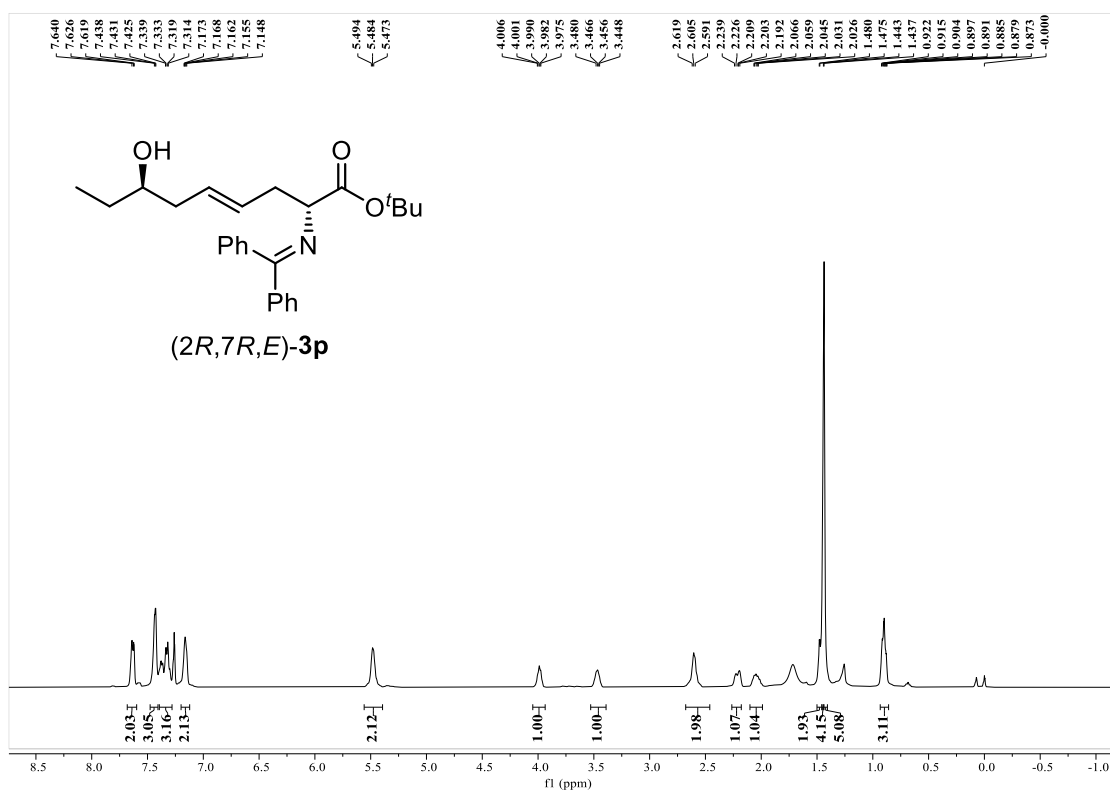

**<sup>1</sup>H NMR (400 MHz, CDCl<sub>3</sub>) of (2R,7R,E)-3p**

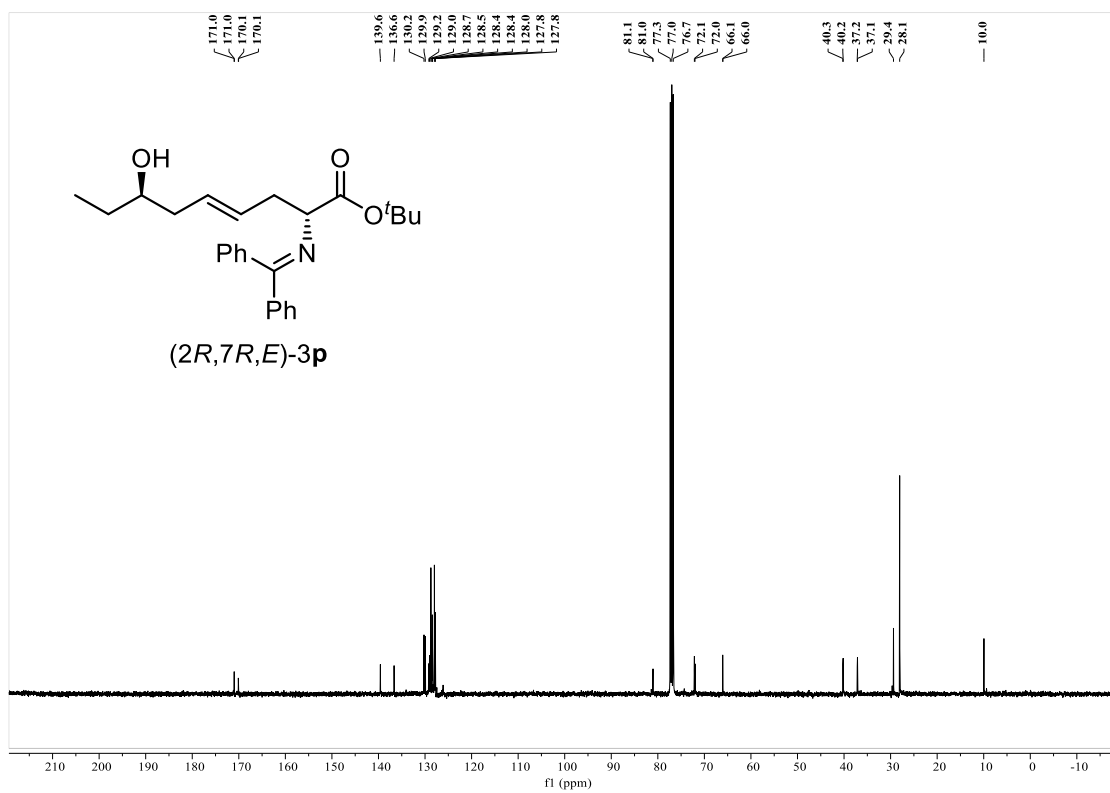

**<sup>13</sup>C NMR (101 MHz, CDCl<sub>3</sub>) of (2R,7R,E)-3p**

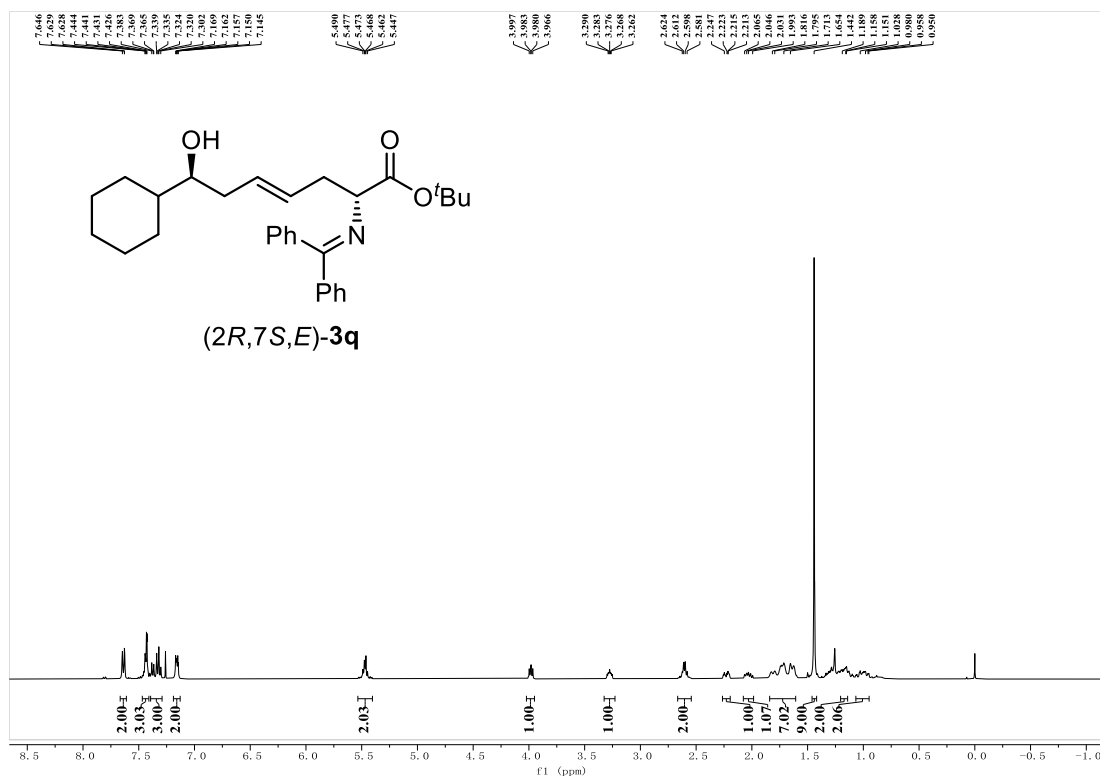

**<sup>1</sup>H NMR (400 MHz, CDCl<sub>3</sub>) of (2*R*,7*S*,*E*)-3q**

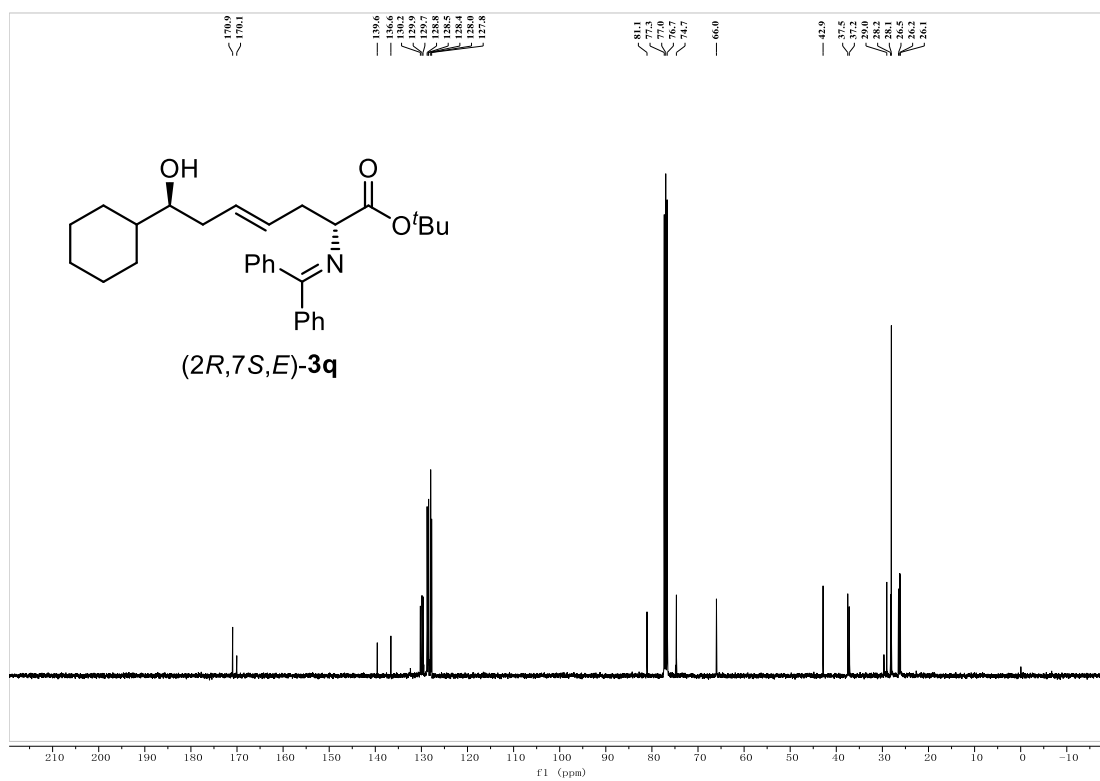

**<sup>13</sup>C NMR (101 MHz, CDCl<sub>3</sub>) of (2*R*,7*S*,*E*)-3q**

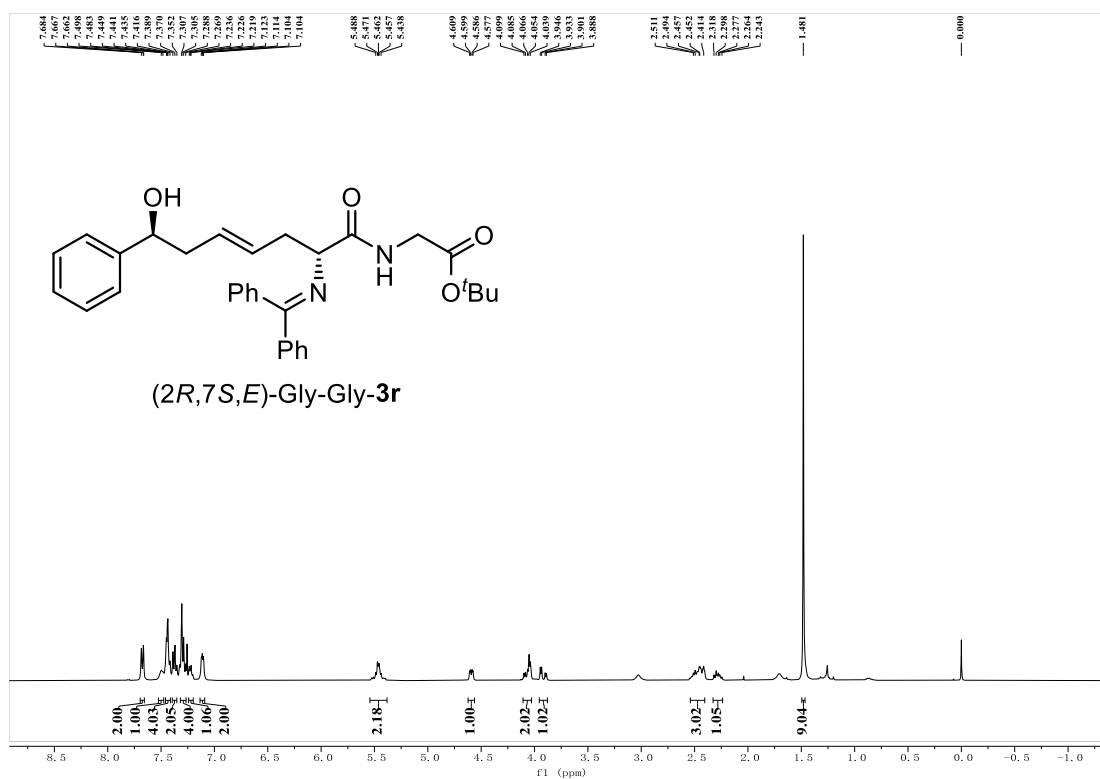

<sup>1</sup>H NMR (400 MHz, CDCl<sub>3</sub>) of (2R,7S,E)-Gly-Gly-3r

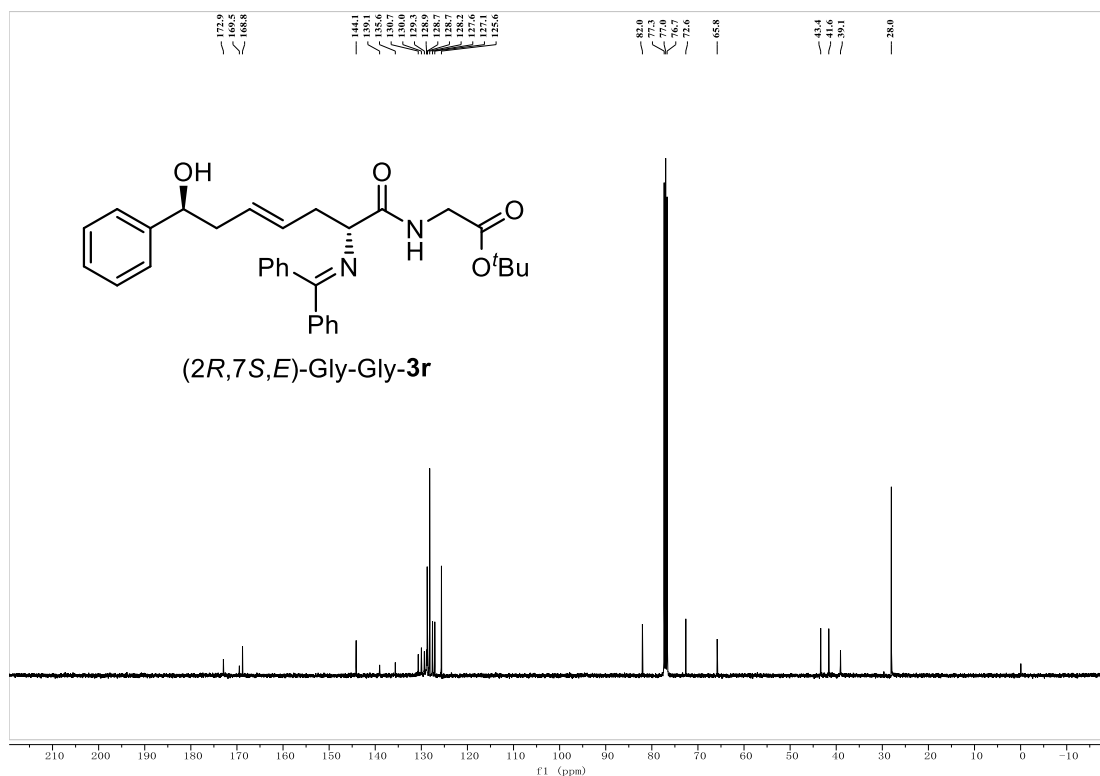

<sup>13</sup>C NMR (101 MHz, CDCl<sub>3</sub>) of (2R,7S,E)-Gly-Gly-3r

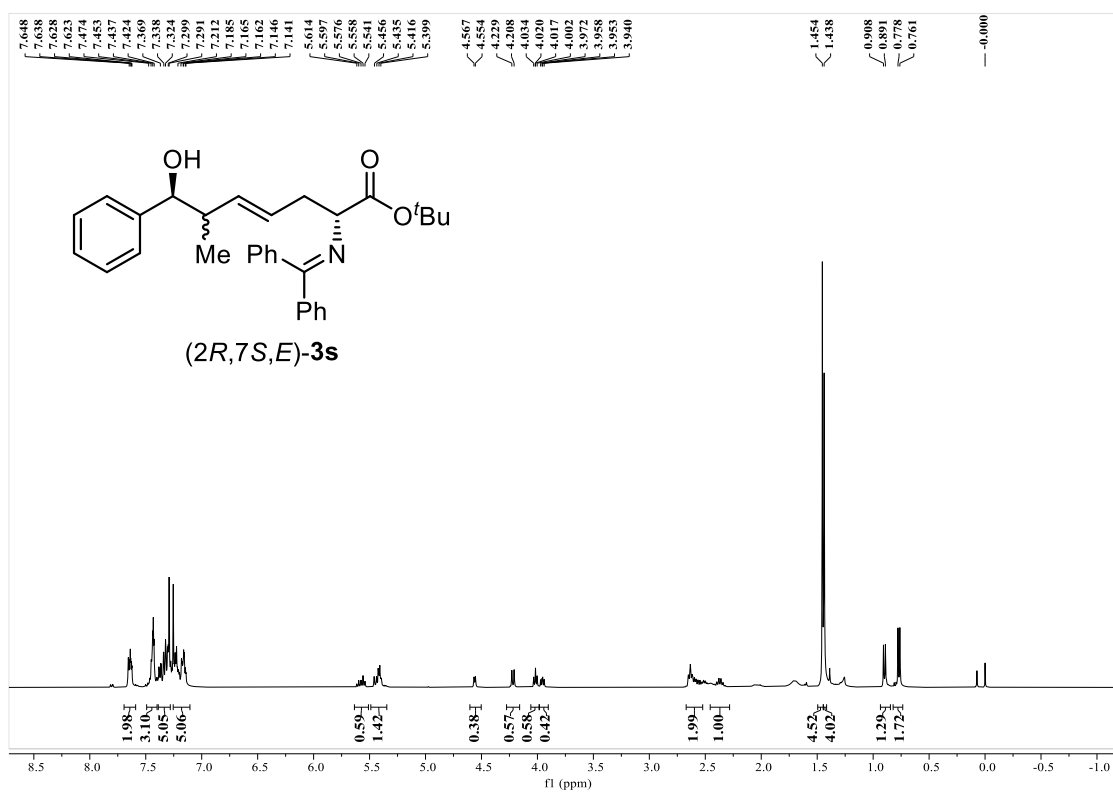

$^1\text{H NMR}$  (400 MHz,  $\text{CDCl}_3$ ) of **(2R,7S,E)-3s**

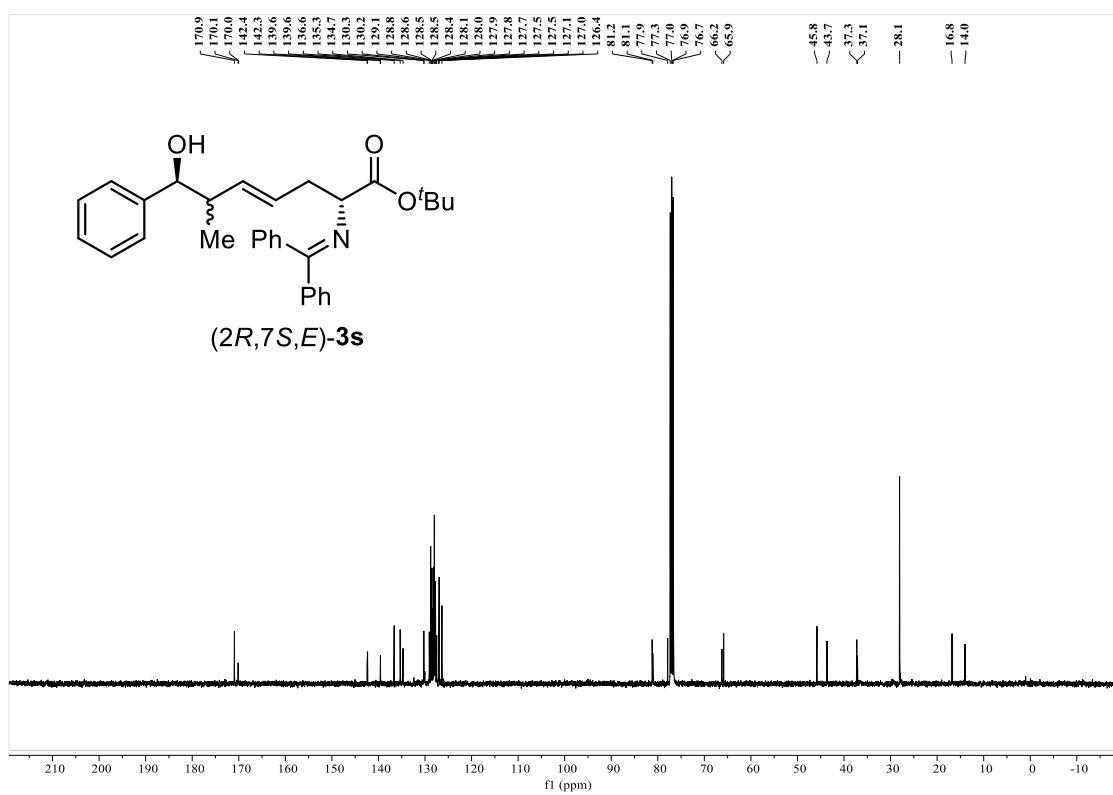

$^{13}\text{C NMR}$  (101 MHz,  $\text{CDCl}_3$ ) of **(2R,7S,E)-3s**

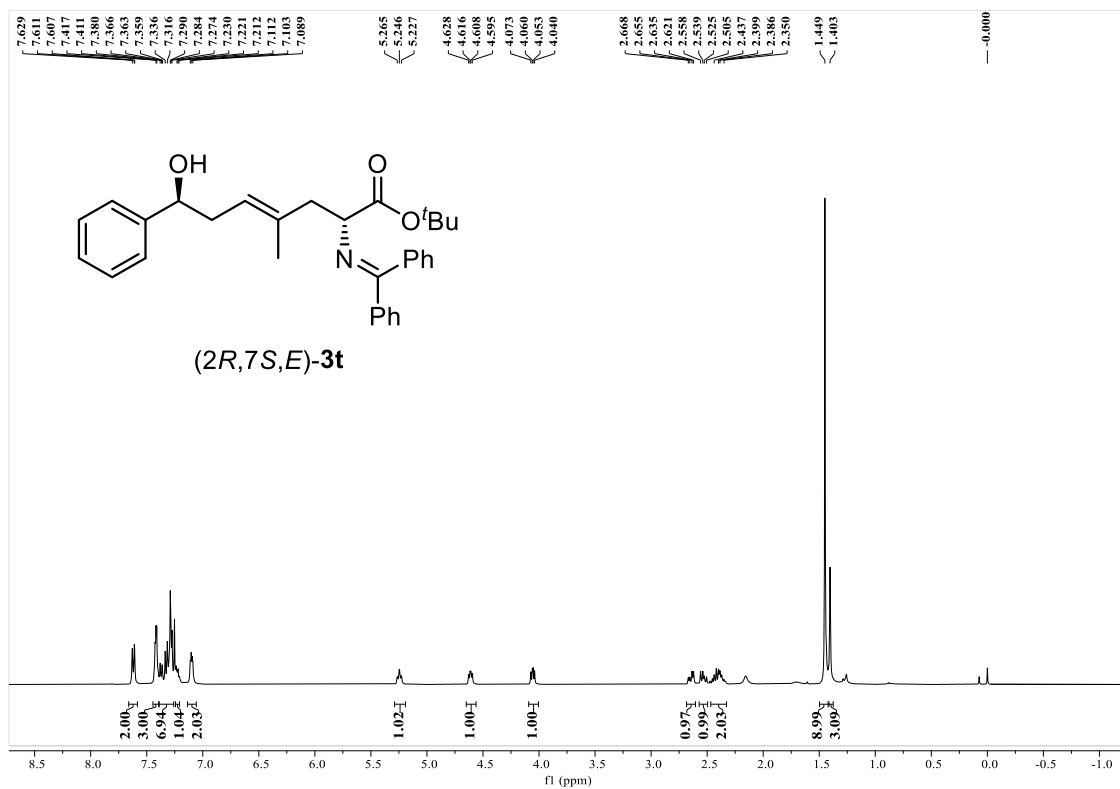

**<sup>1</sup>H NMR (400 MHz, CDCl<sub>3</sub>) of (2*R*,7*S*,*E*)-3t**

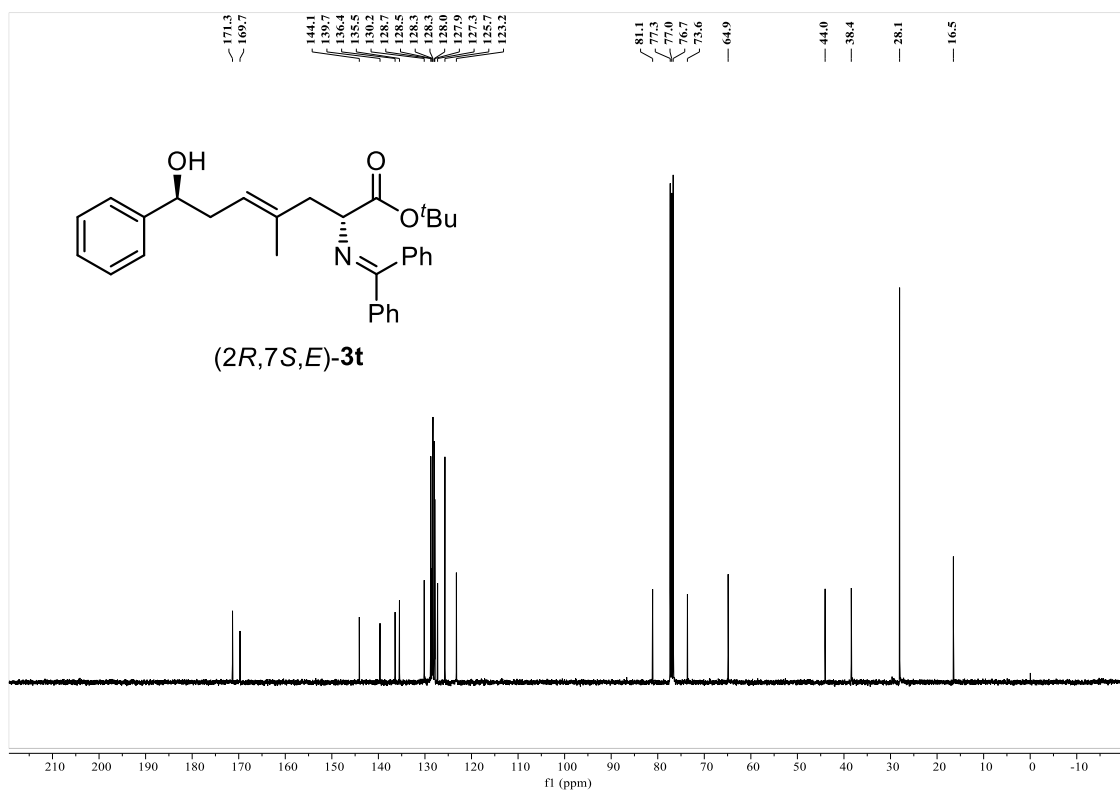

**<sup>13</sup>C NMR (101 MHz, CDCl<sub>3</sub>) of (2*R*,7*S*,*E*)-3t**

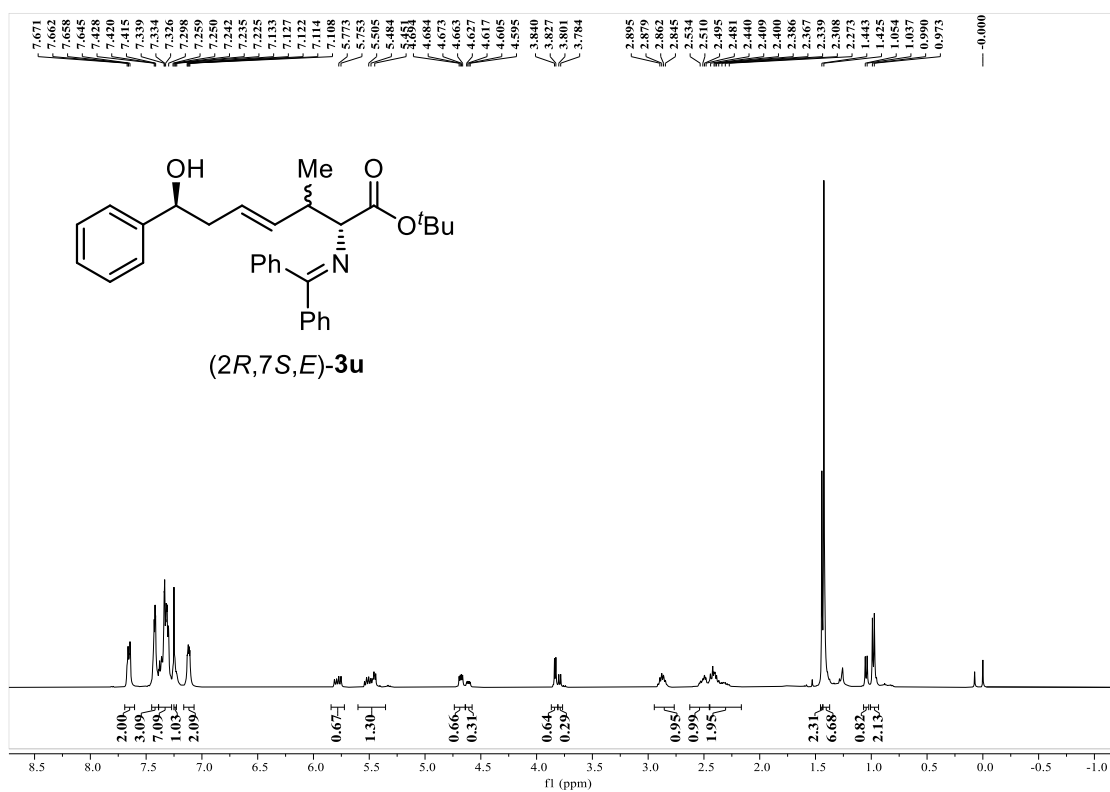

**<sup>1</sup>H NMR (400 MHz, CDCl<sub>3</sub>) of (2*R*,7*S*,*E*)-3u**

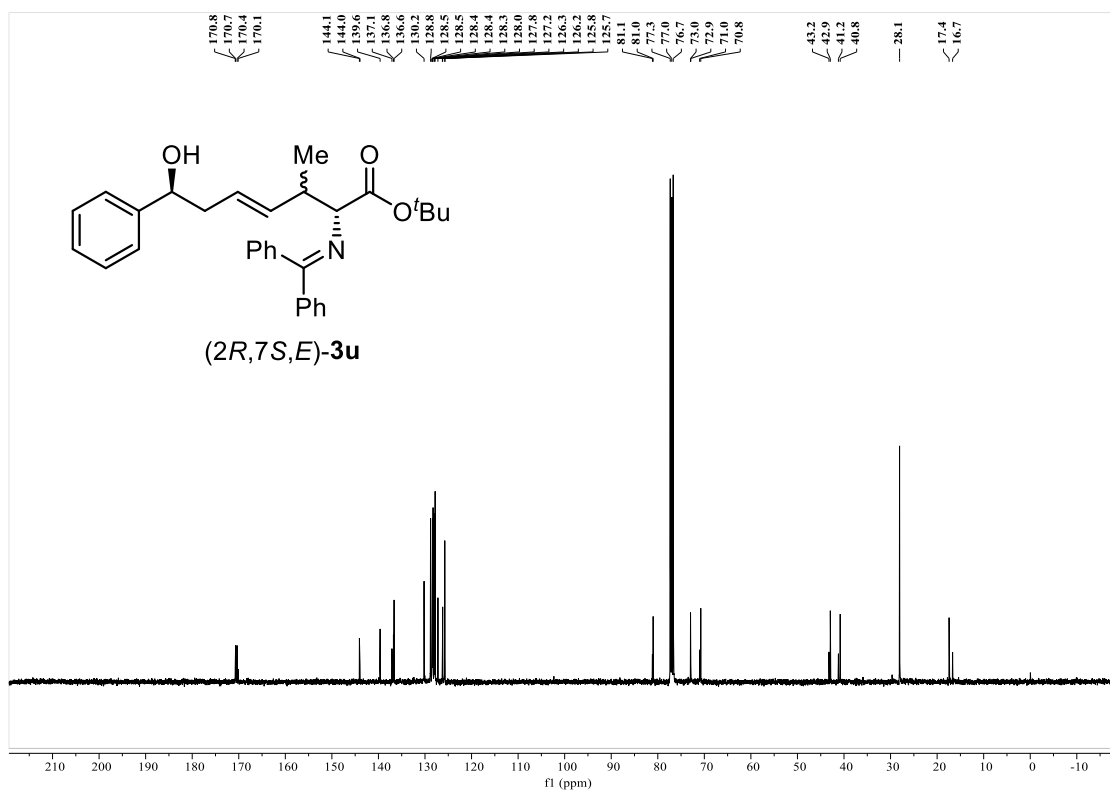

**<sup>13</sup>C NMR (101 MHz, CDCl<sub>3</sub>) of (2*R*,7*S*,*E*)-3u**



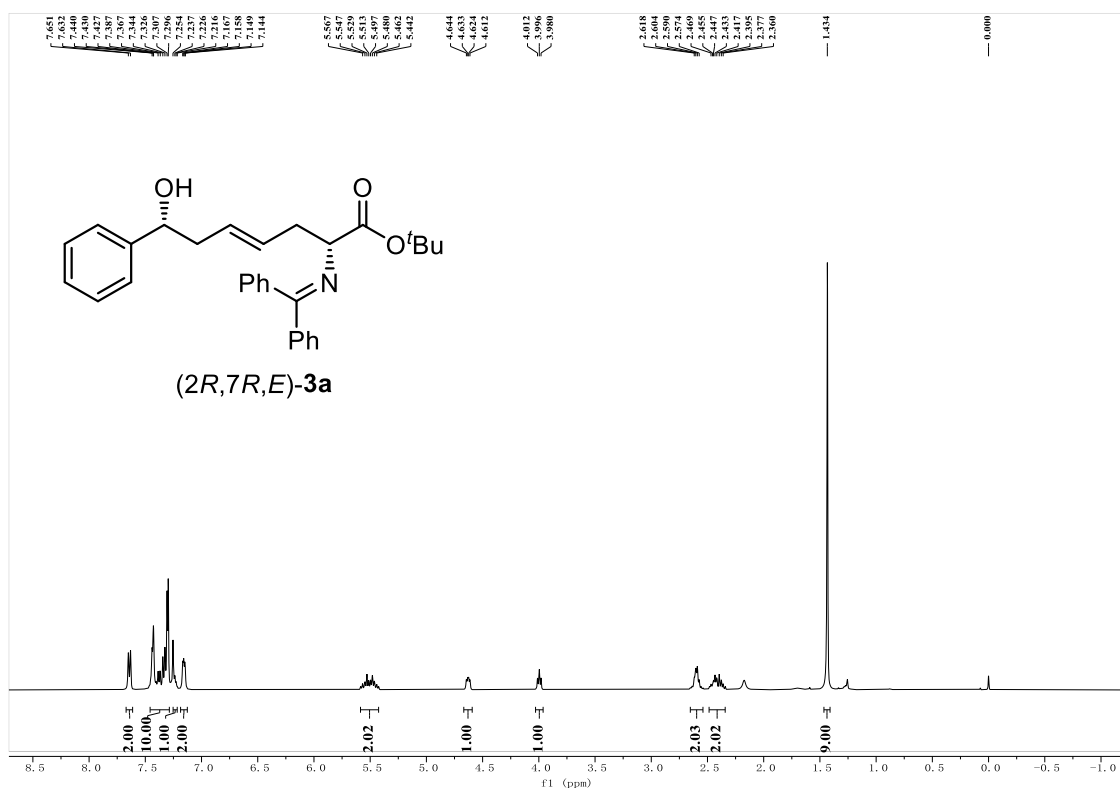

**<sup>1</sup>H NMR (400 MHz, CDCl<sub>3</sub>) of (2*R*,7*R*,*E*)-3a**

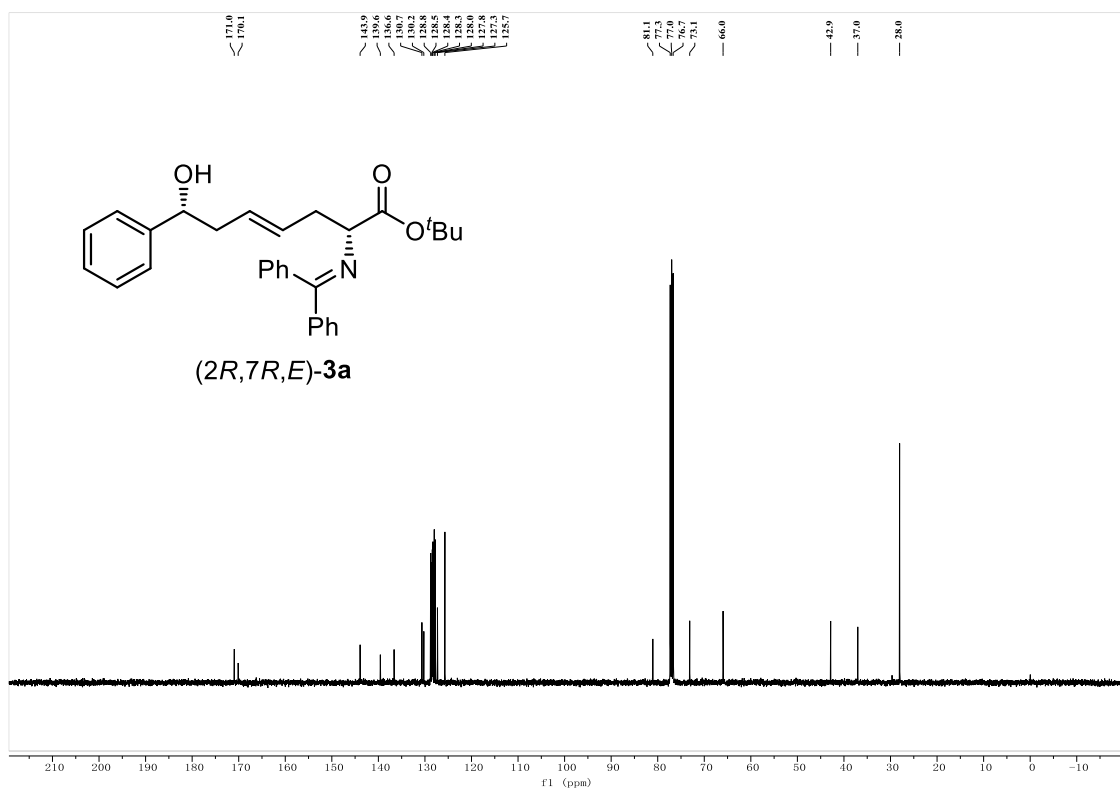

**<sup>13</sup>C NMR (101 MHz, CDCl<sub>3</sub>) of (2*R*,7*R*,*E*)-3a**

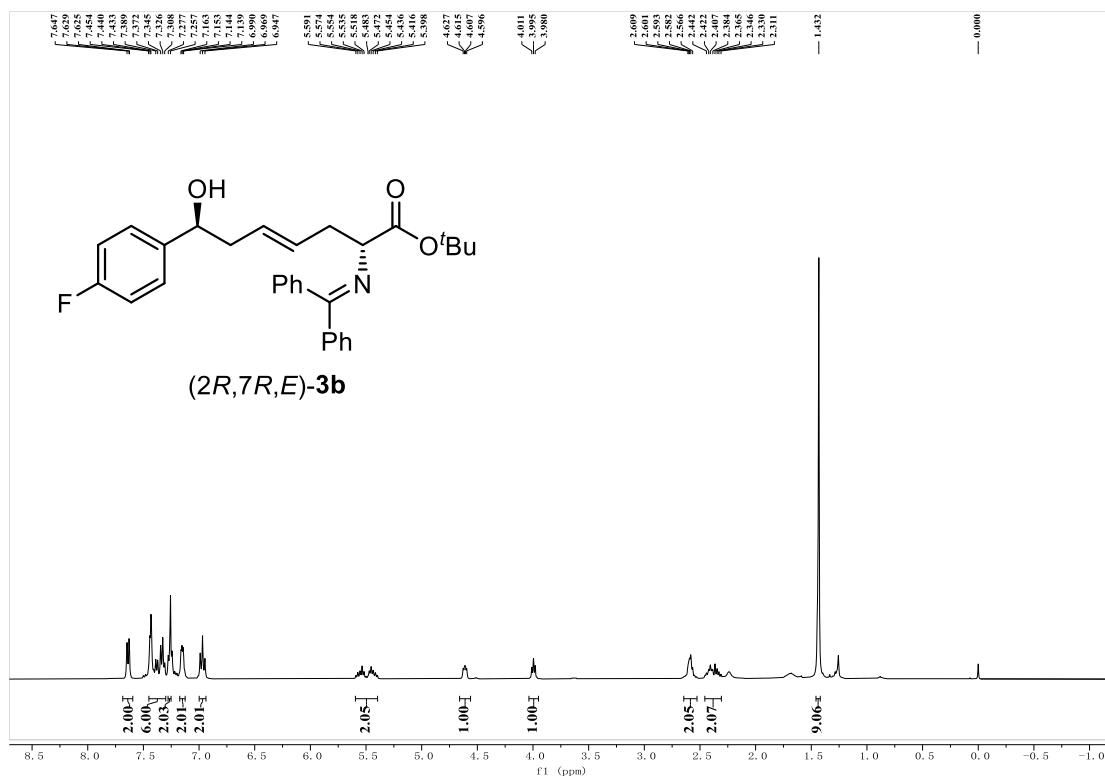

**<sup>1</sup>H NMR (400 MHz, CDCl<sub>3</sub>) of (2*R*,7*R*,*E*)-3b**

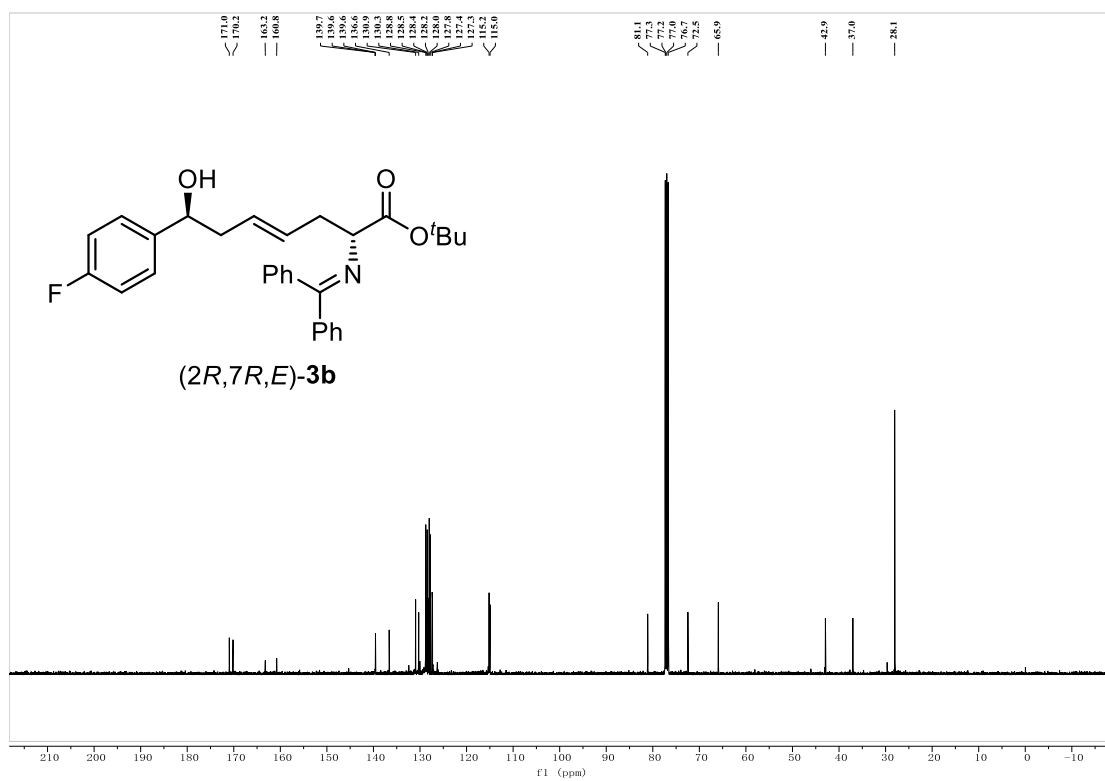

**<sup>13</sup>C NMR (101 MHz, CDCl<sub>3</sub>) of (2*R*,7*R*,*E*)-3b**

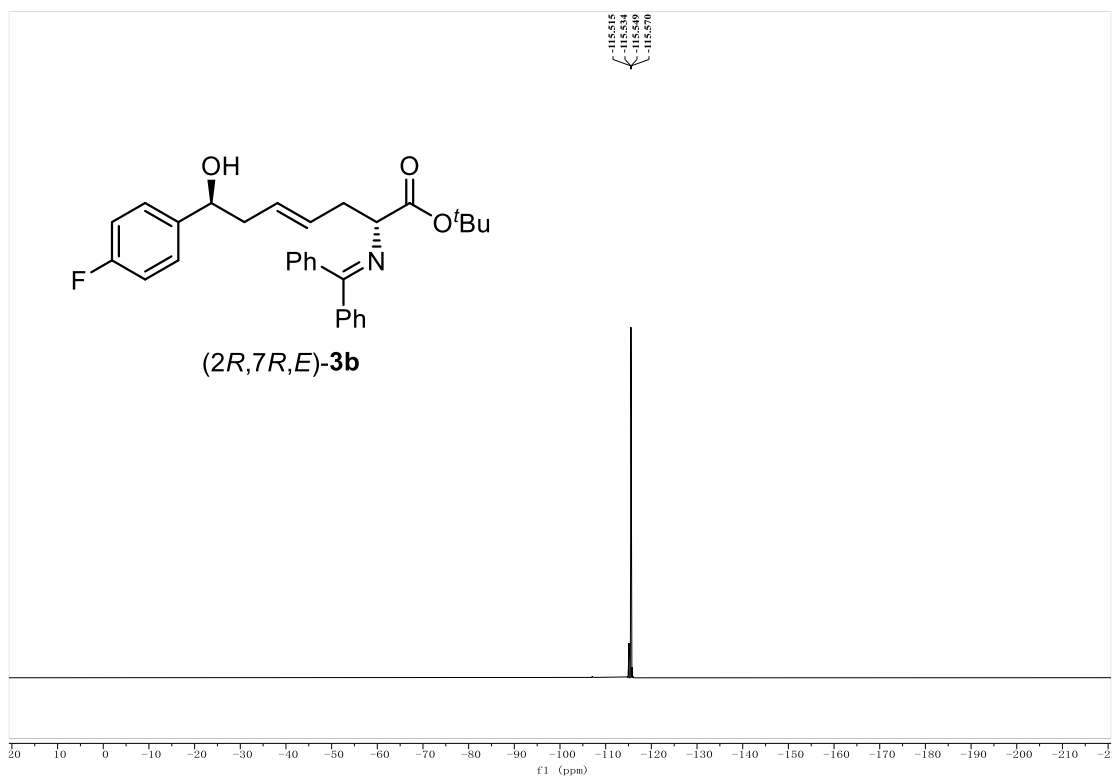

**<sup>19</sup>F NMR (376 MHz, CDCl<sub>3</sub>) of (2R,7R,E)-3b**

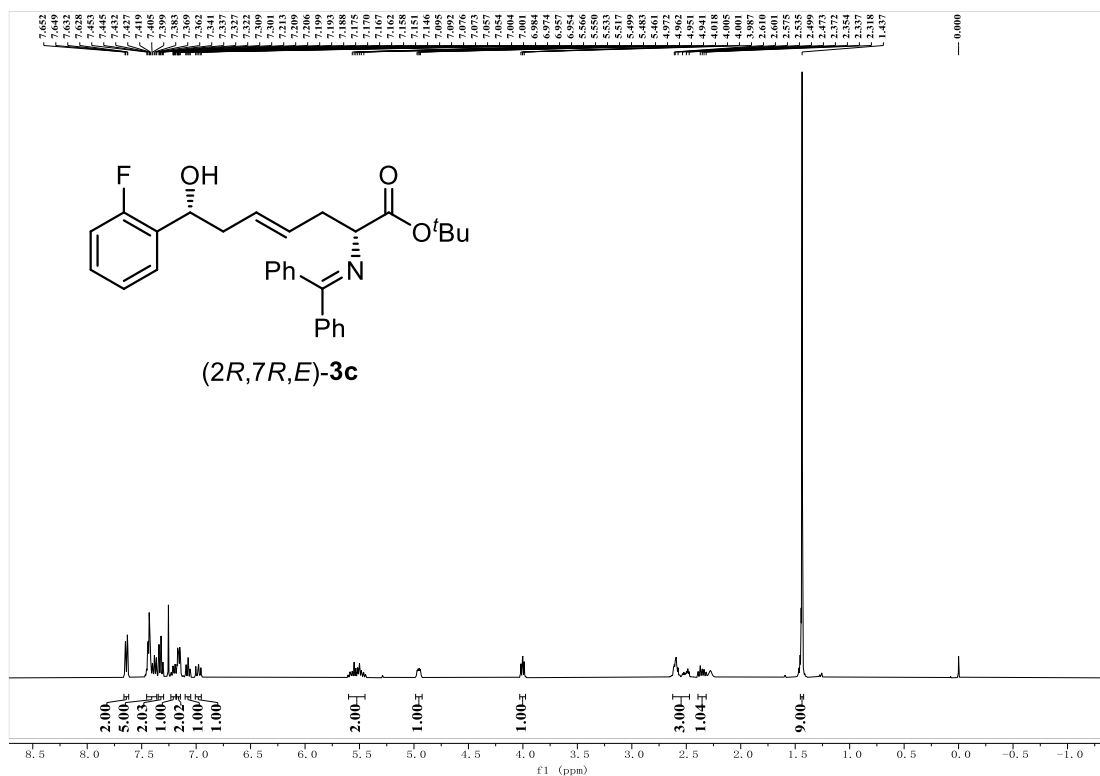

**<sup>1</sup>H NMR (400 MHz, CDCl<sub>3</sub>) of (2*R*,7*R*,*E*)-3c**

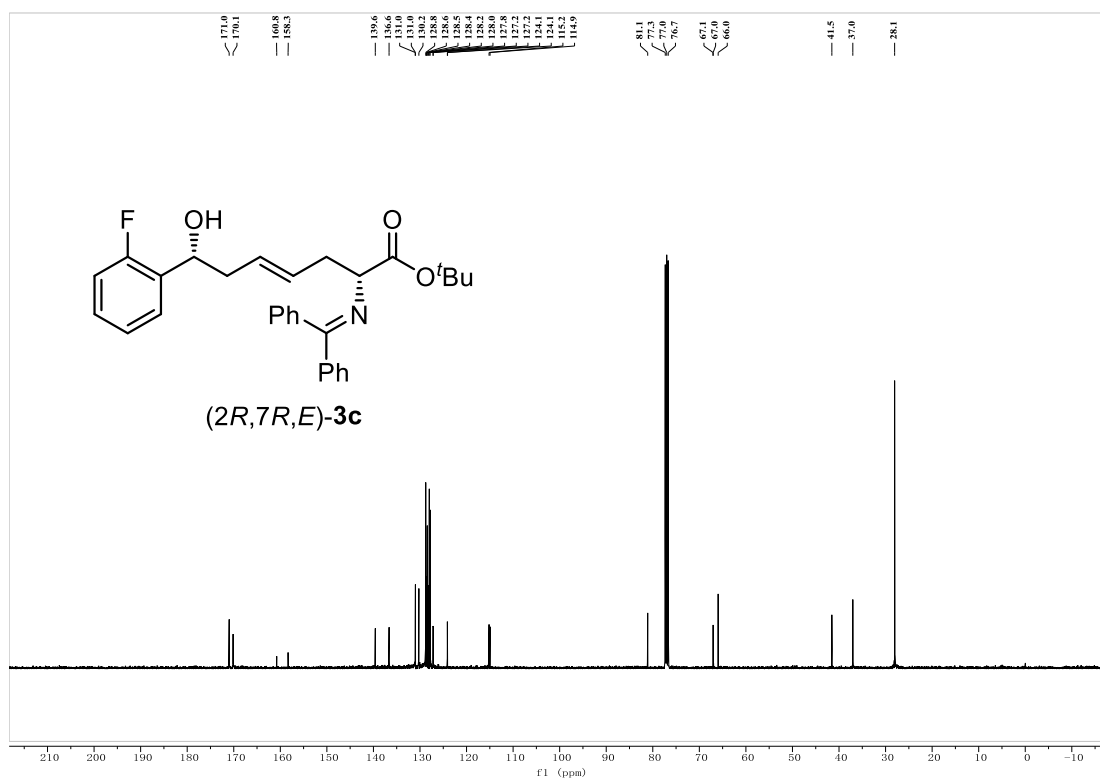

**<sup>13</sup>C NMR (101 MHz, CDCl<sub>3</sub>) of (2*R*,7*R*,*E*)-3c**

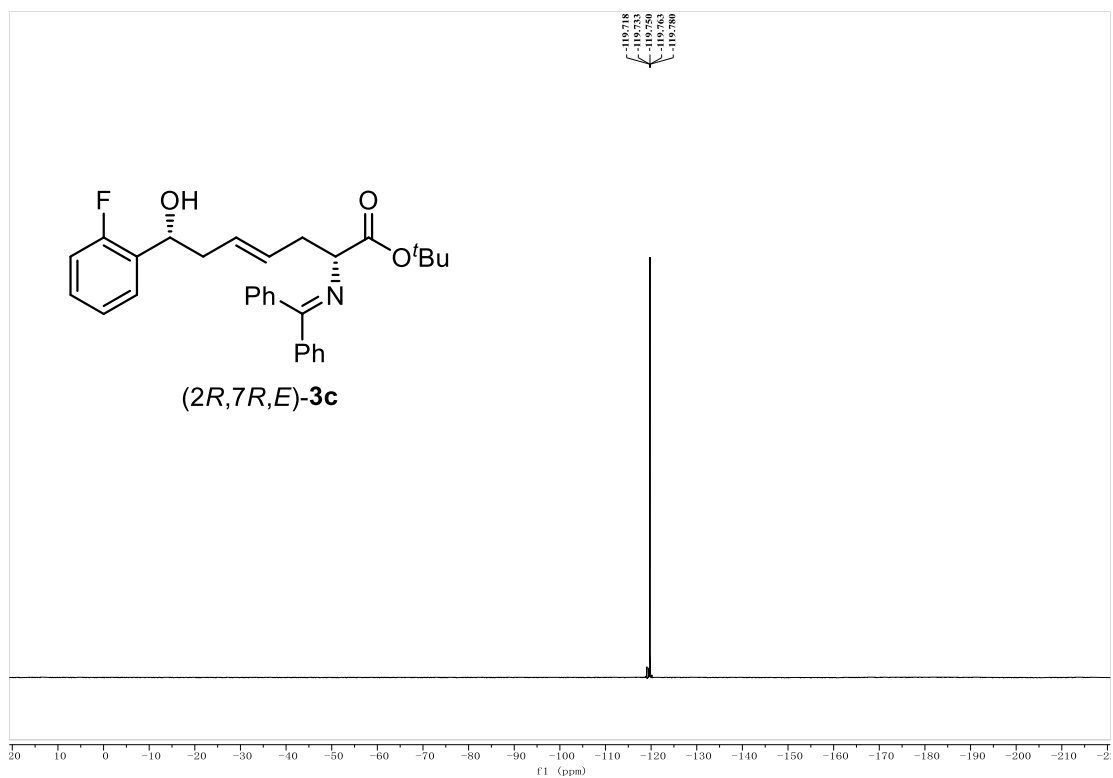

<sup>19</sup>F NMR (376 MHz, CDCl<sub>3</sub>) of (2R,7R,E)-3c

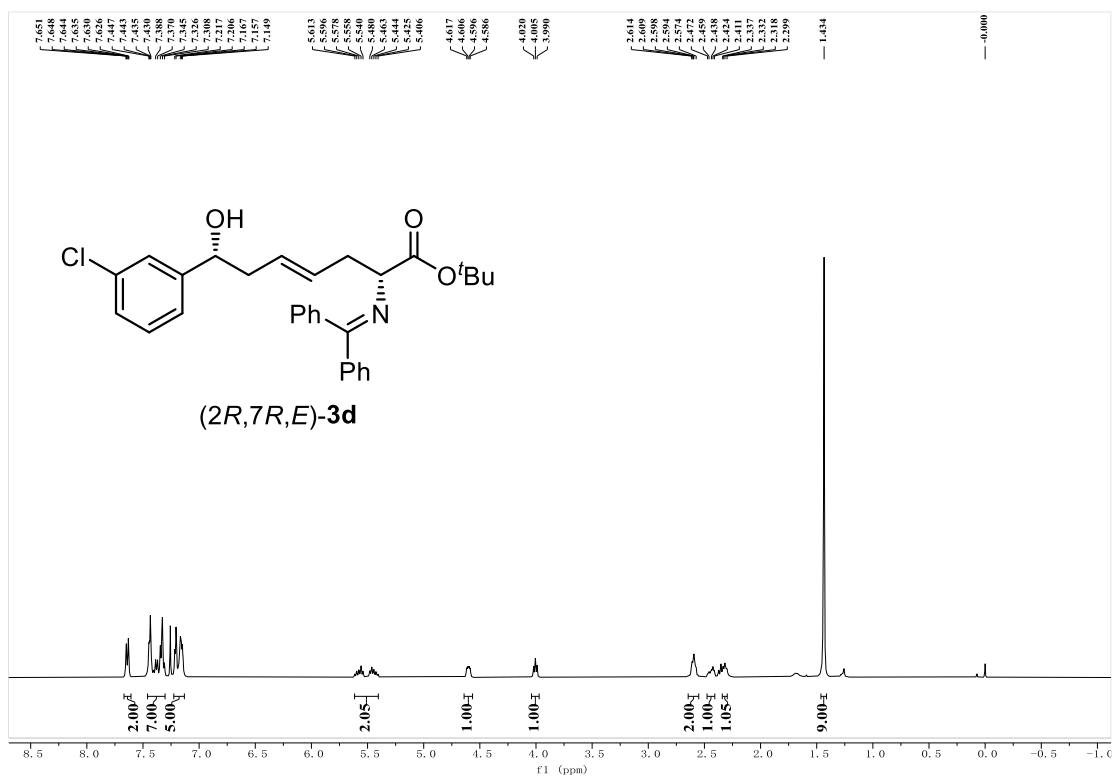

$^1\text{H NMR}$  (400 MHz,  $\text{CDCl}_3$ ) of **(2R,7R,E)-3d**

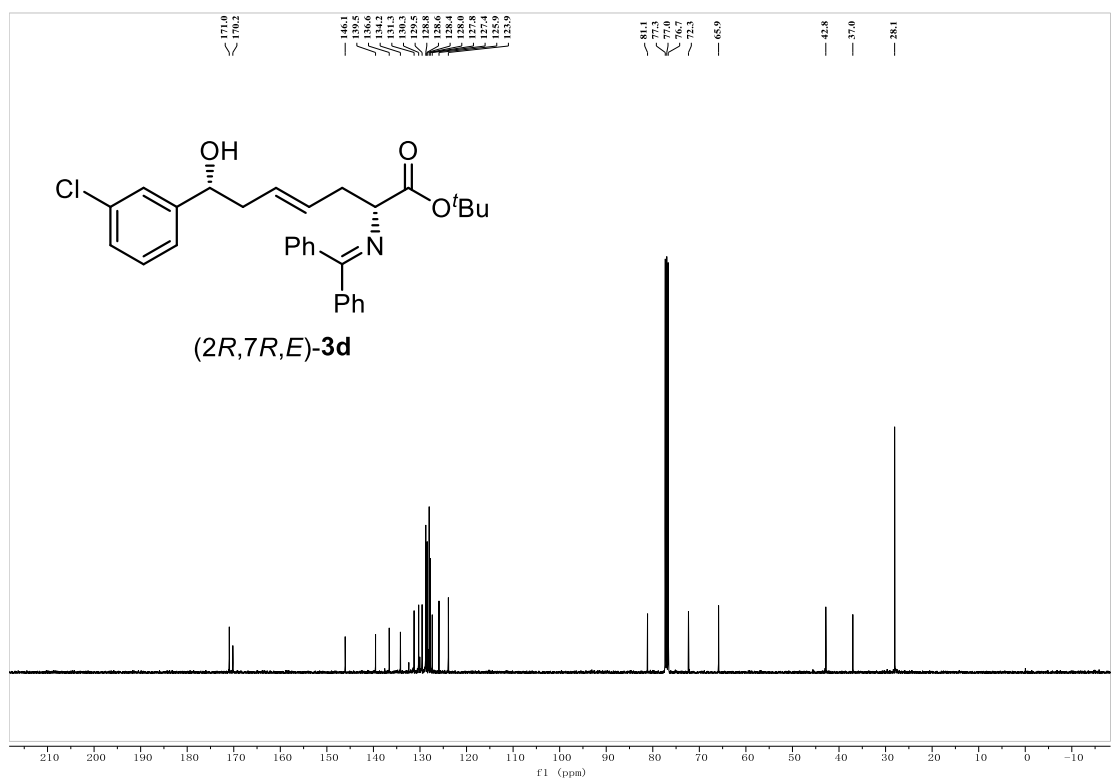

$^{13}\text{C NMR}$  (101 MHz,  $\text{CDCl}_3$ ) of **(2R,7R,E)-3d**

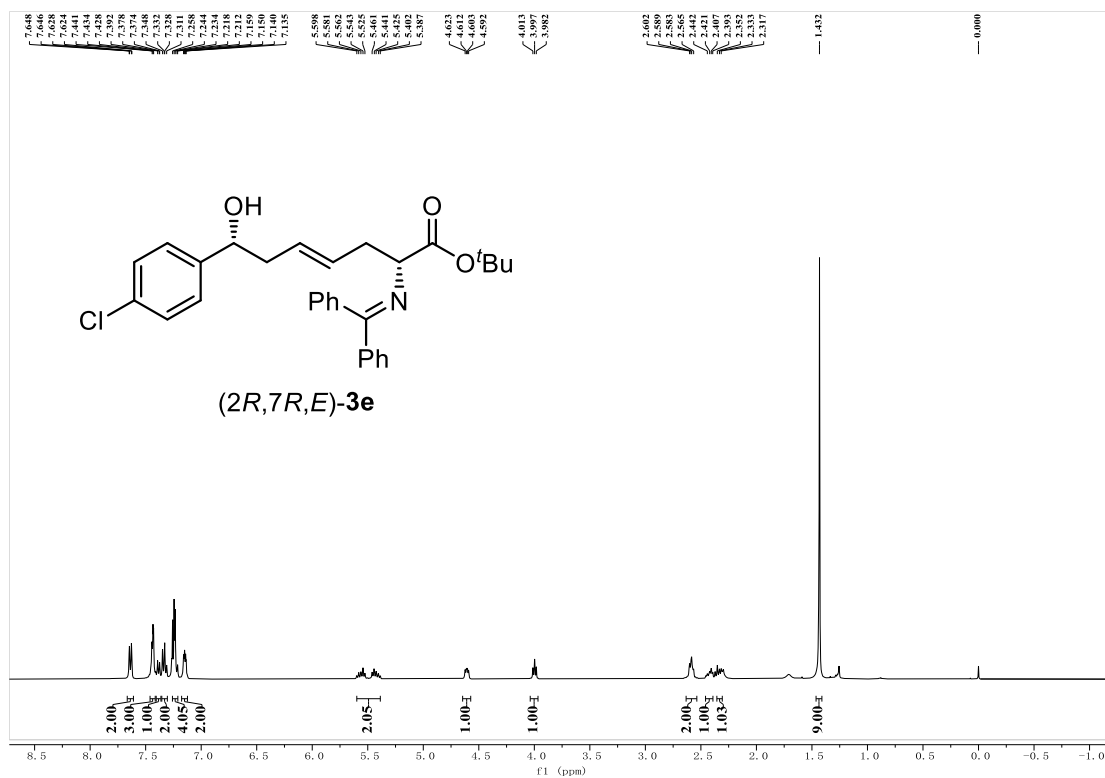

$^1\text{H}$  NMR (400 MHz,  $\text{CDCl}_3$ ) of **(2R,7R,E)-3e**

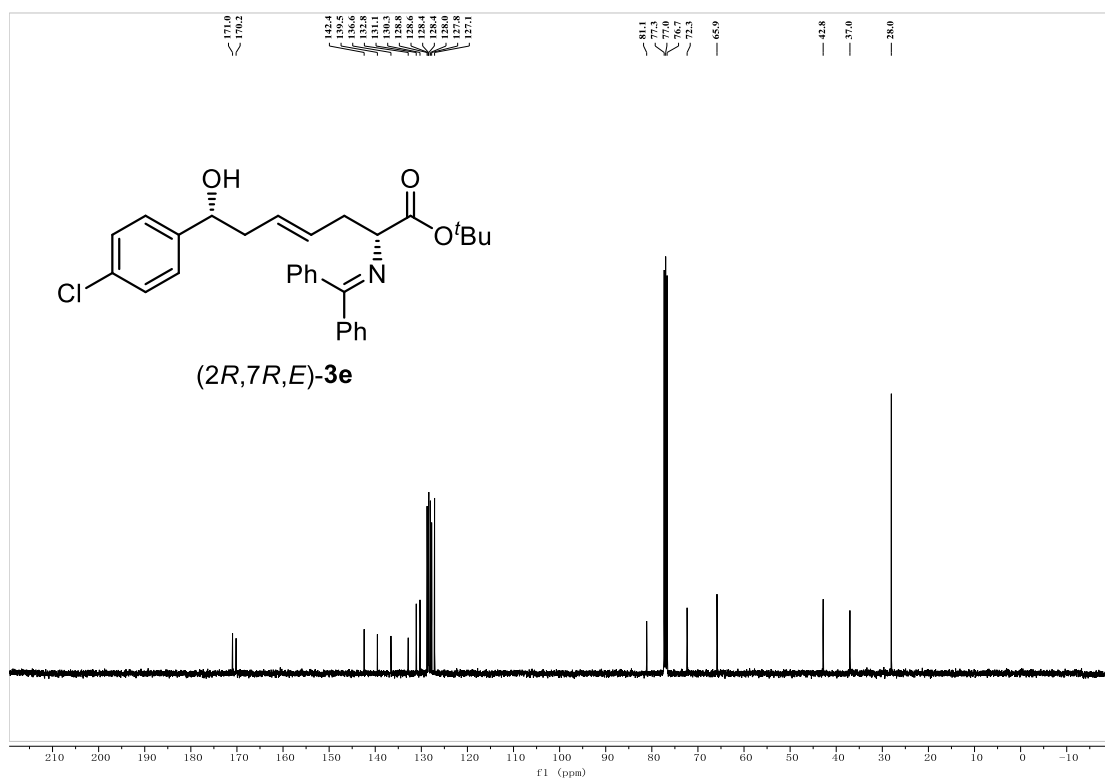

$^{13}\text{C}$  NMR (101 MHz,  $\text{CDCl}_3$ ) of **(2R,7R,E)-3e**

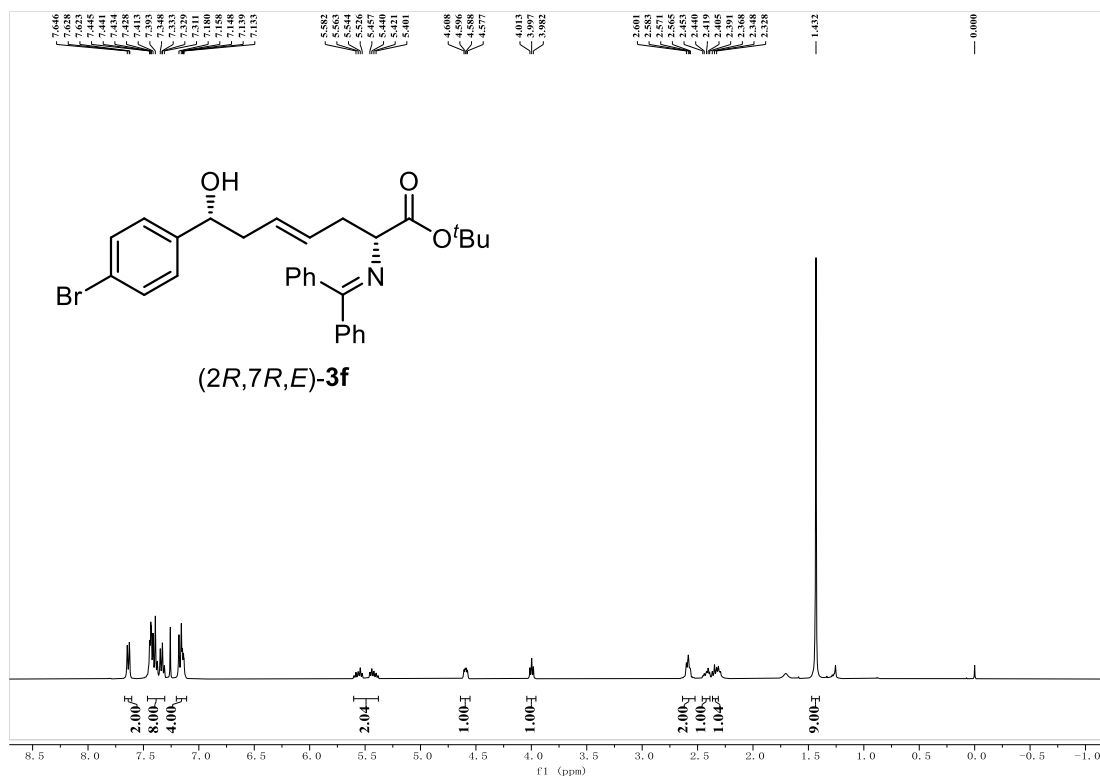

**<sup>1</sup>H NMR (400 MHz, CDCl<sub>3</sub>) of (2*R*,7*R*,*E*)-3f**

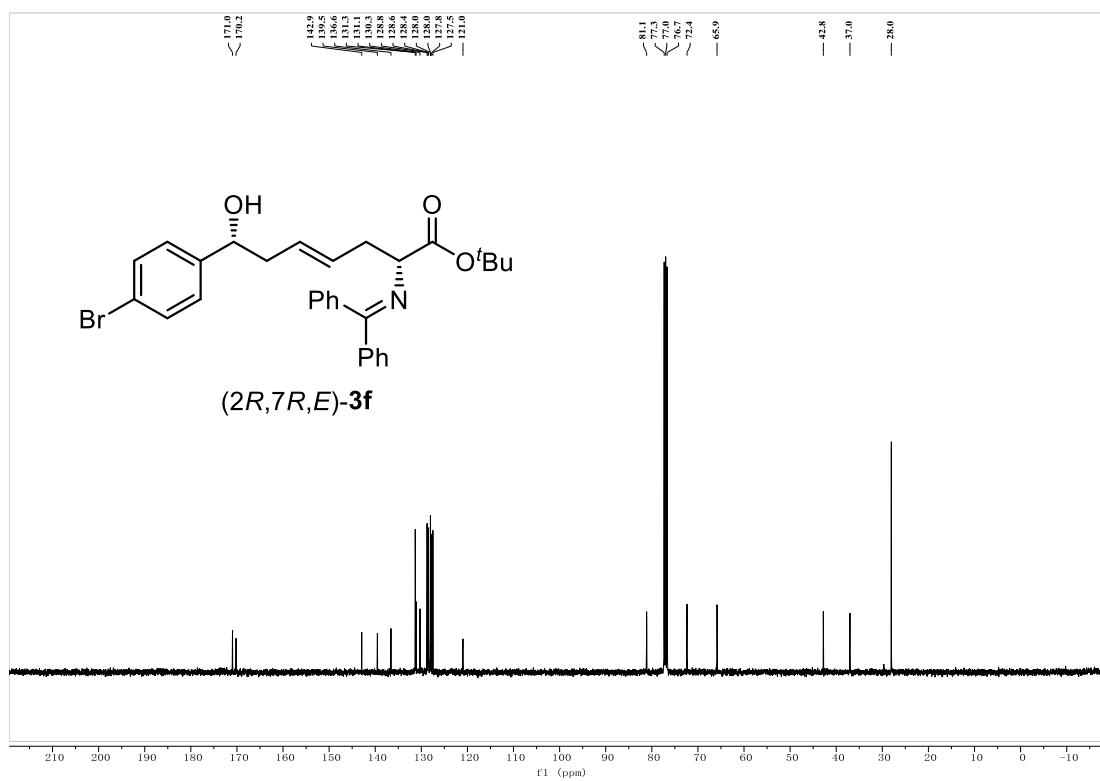

**<sup>13</sup>C NMR (101 MHz, CDCl<sub>3</sub>) of (2*R*,7*R*,*E*)-3f**



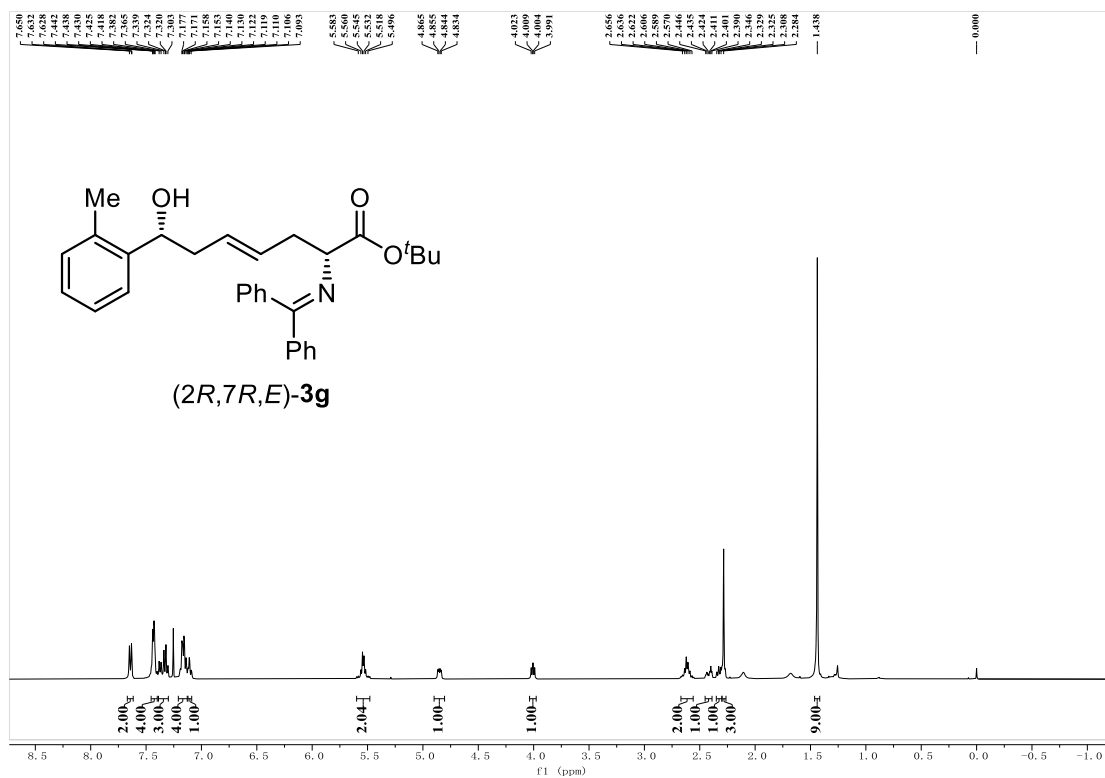

$^1\text{H NMR}$  (400 MHz,  $\text{CDCl}_3$ ) of **(2R,7R,E)-3g**

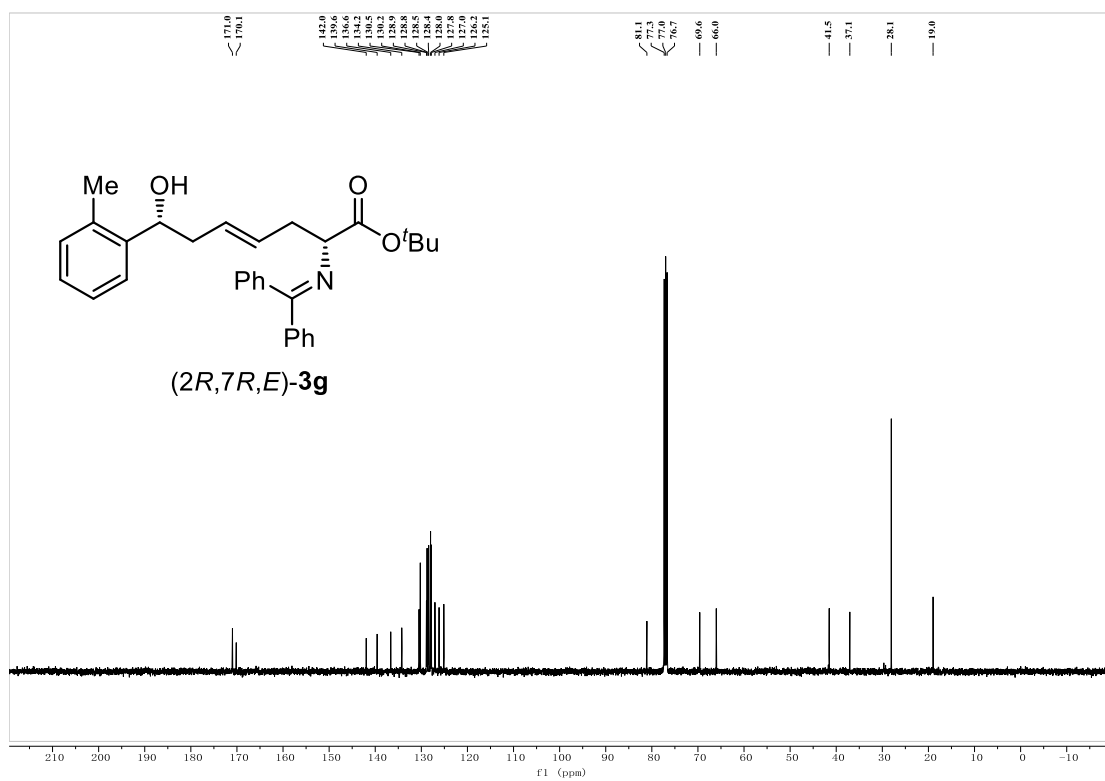

$^{13}\text{C NMR}$  (101 MHz,  $\text{CDCl}_3$ ) of **(2R,7R,E)-3g**

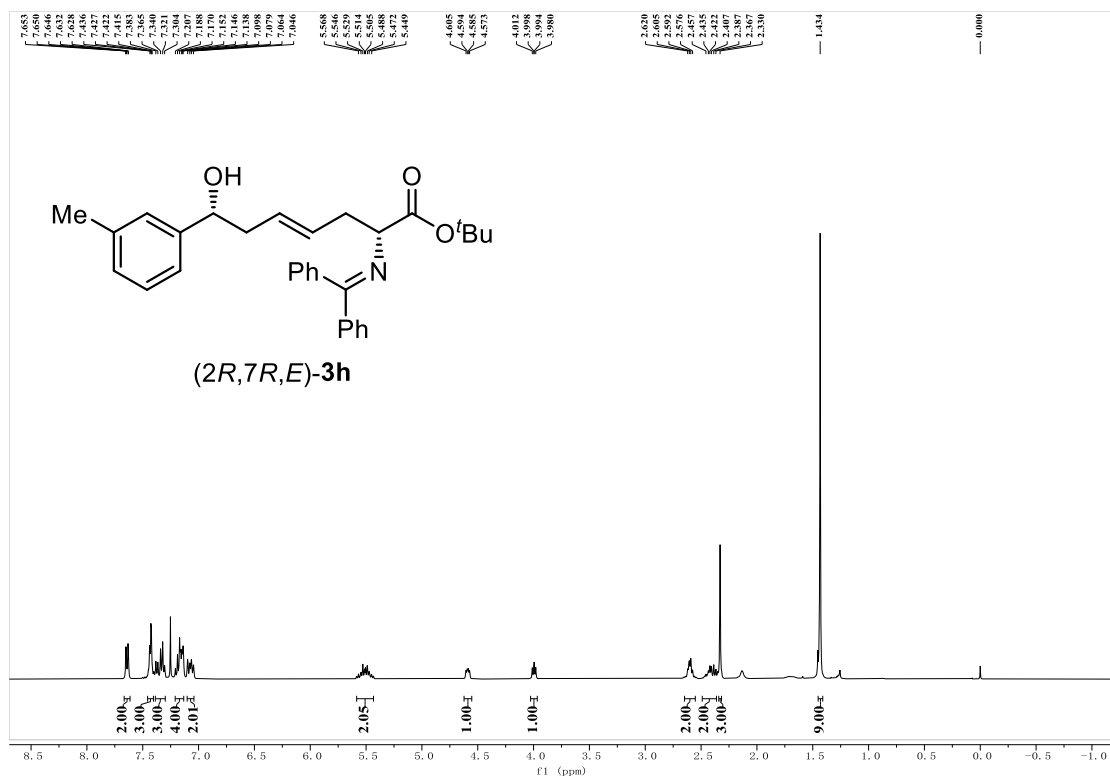

**<sup>1</sup>H NMR (400 MHz, CDCl<sub>3</sub>) of (2R,7R,E)-3h**

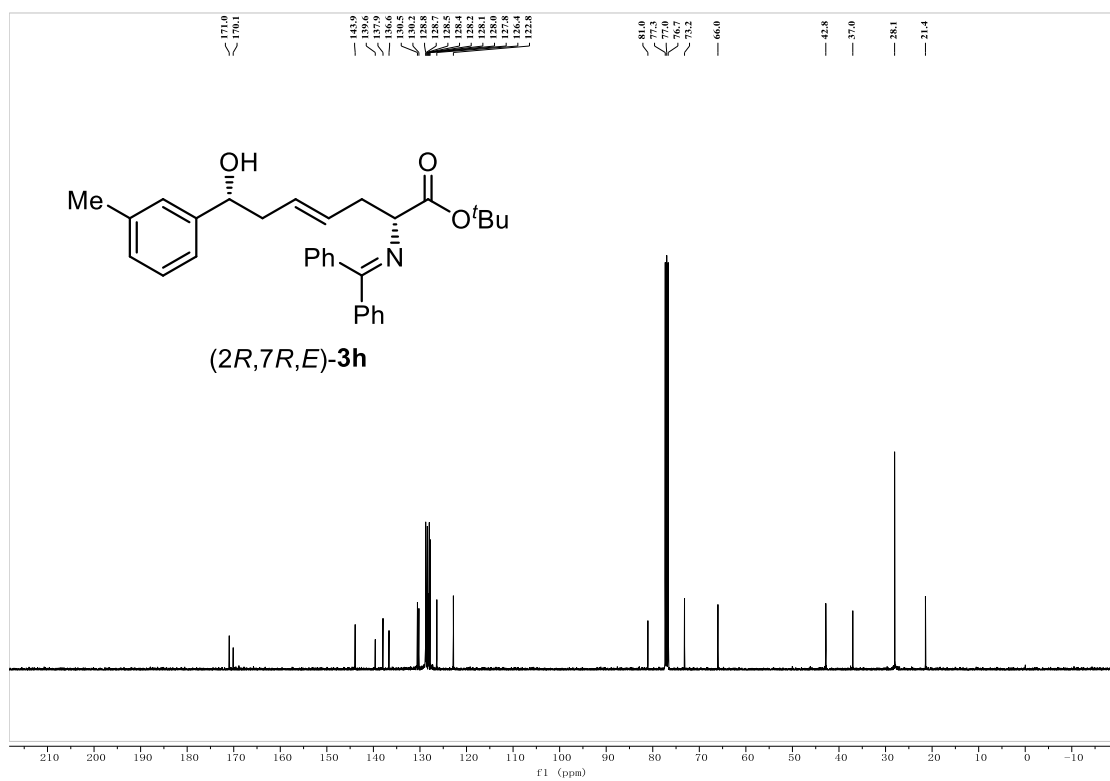

**<sup>13</sup>C NMR (101 MHz, CDCl<sub>3</sub>) of (2R,7R,E)-3h**

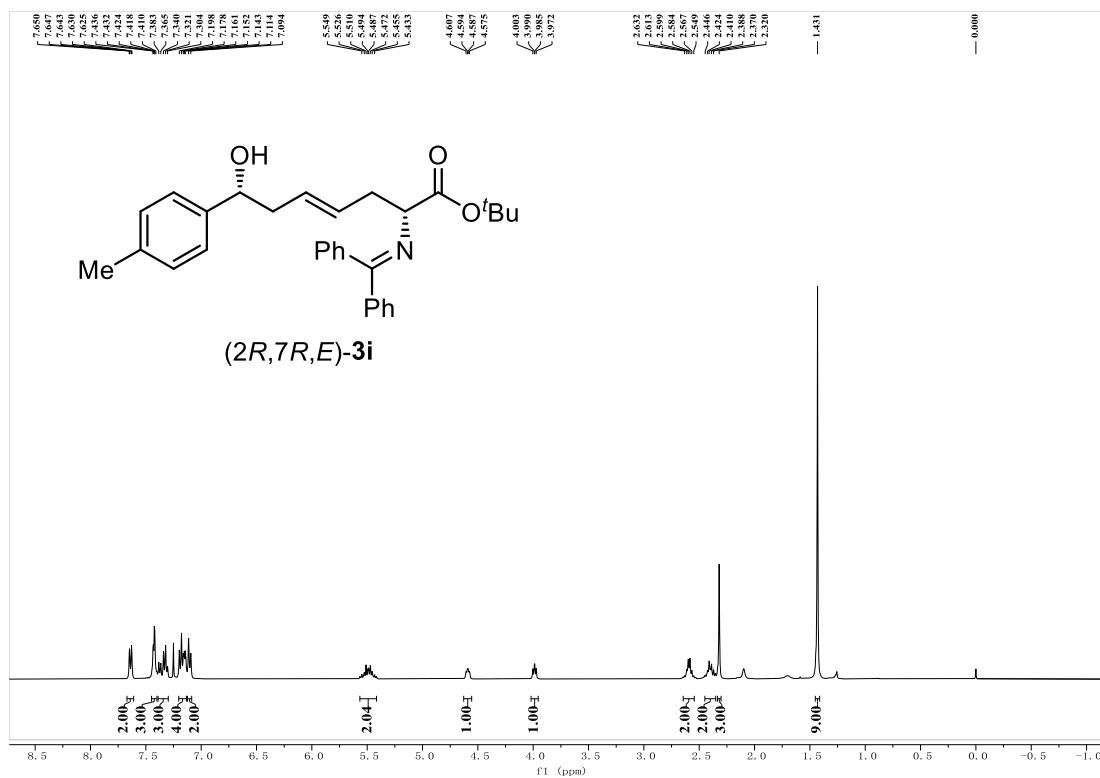

**<sup>1</sup>H NMR (400 MHz, CDCl<sub>3</sub>) of (2*R*,7*R*,*E*)-3i**

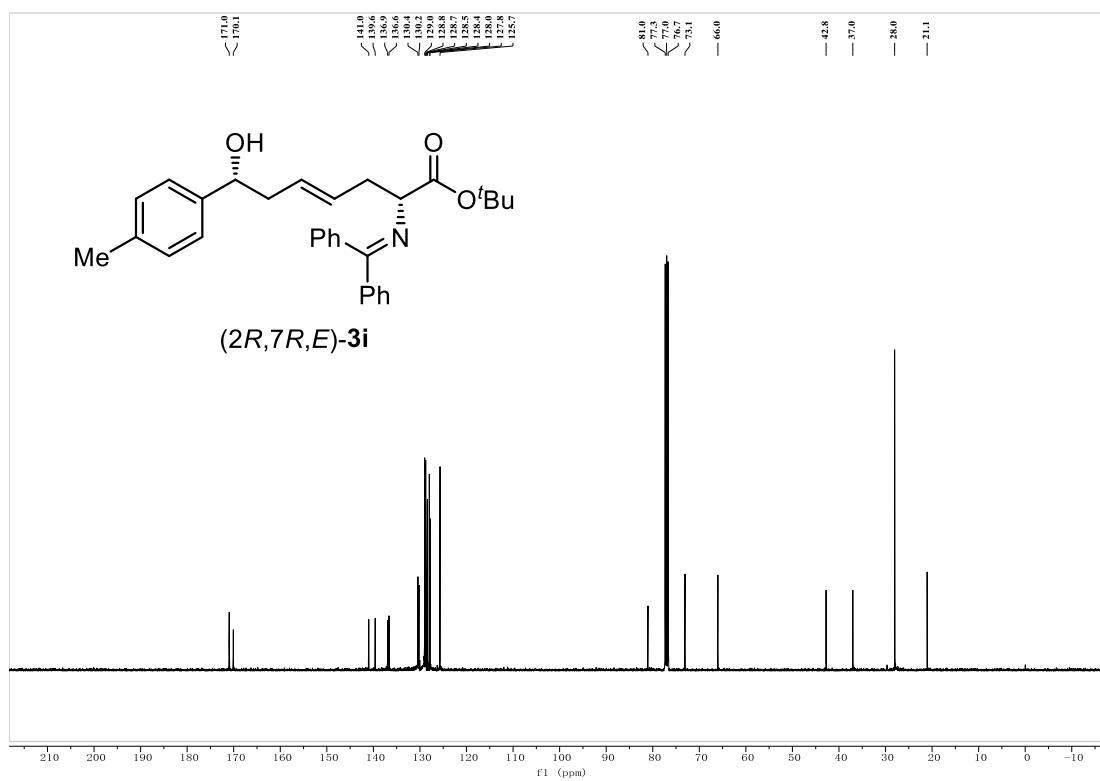

**<sup>13</sup>C NMR (101 MHz, CDCl<sub>3</sub>) of (2*R*,7*R*,*E*)-3i**

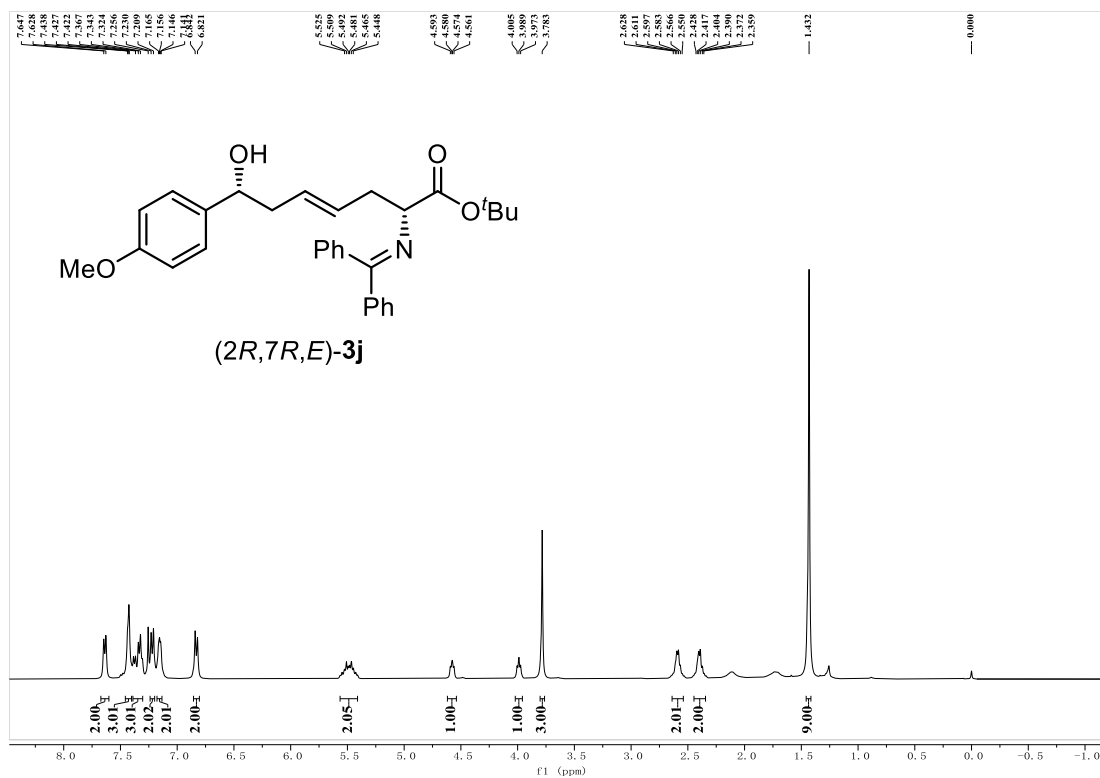

$^1\text{H NMR}$  (400 MHz,  $\text{CDCl}_3$ ) of **(2R,7R,E)-3j**

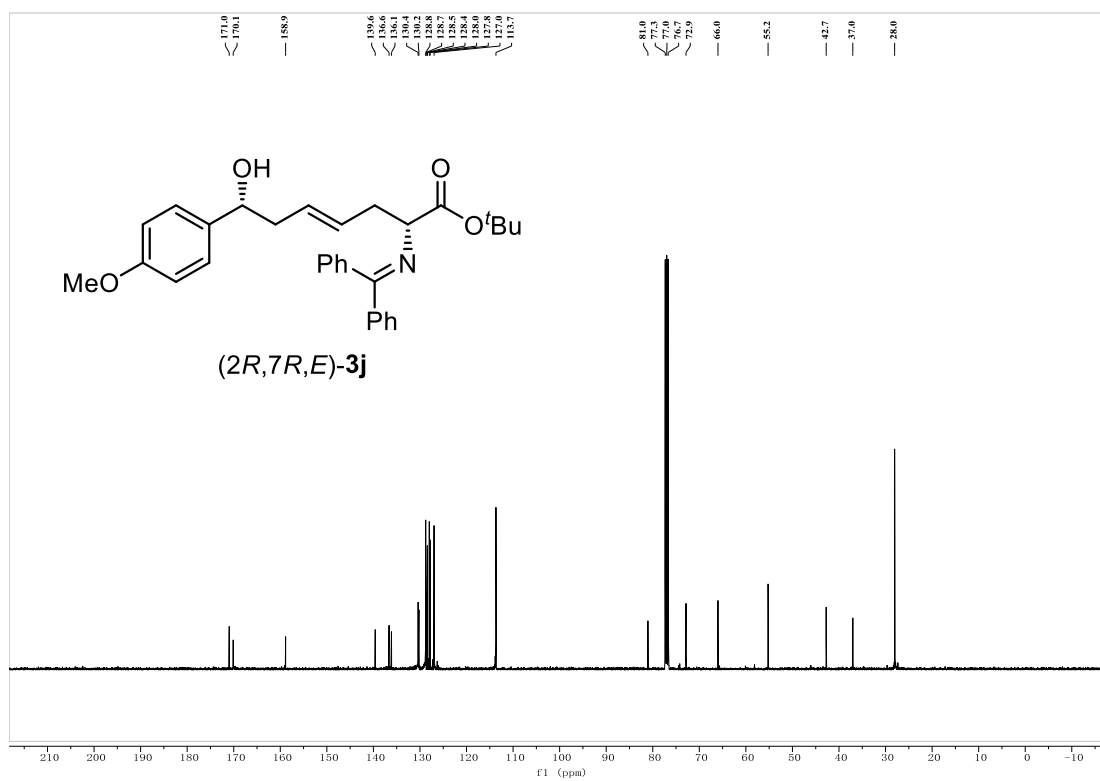

$^{13}\text{C NMR}$  (101 MHz,  $\text{CDCl}_3$ ) of **(2R,7R,E)-3j**

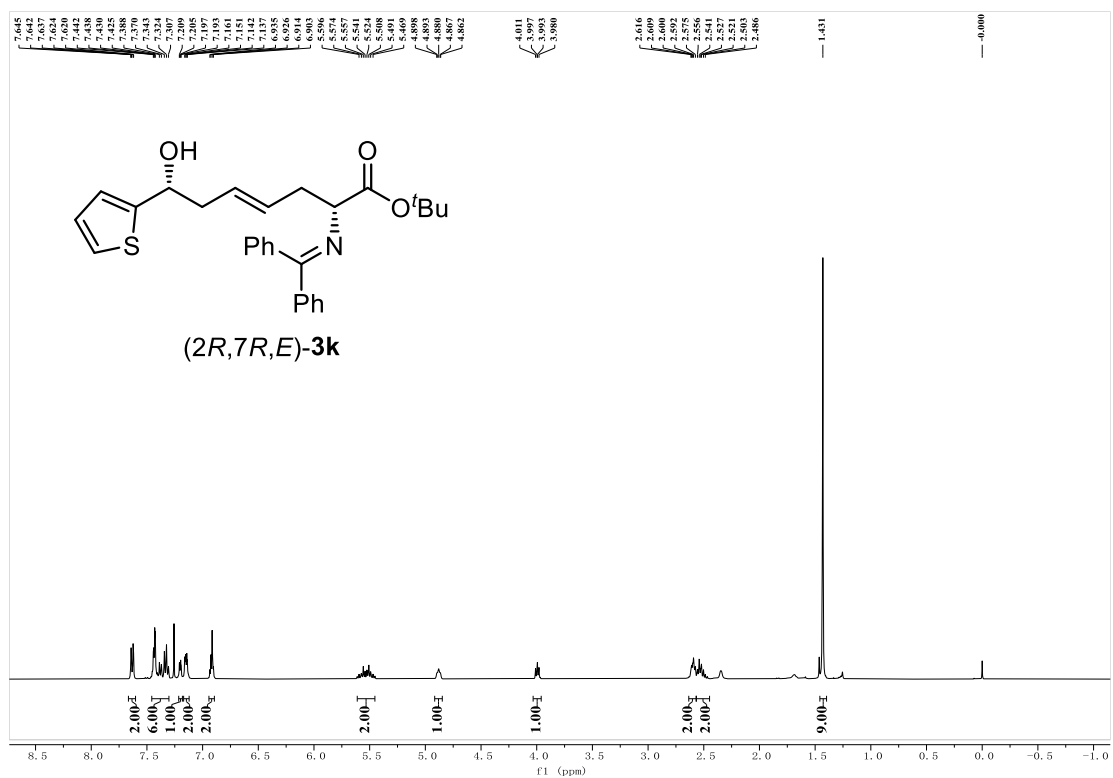

**<sup>1</sup>H NMR (400 MHz, CDCl<sub>3</sub>) of (2*R*,7*R*,*E*)-3k**

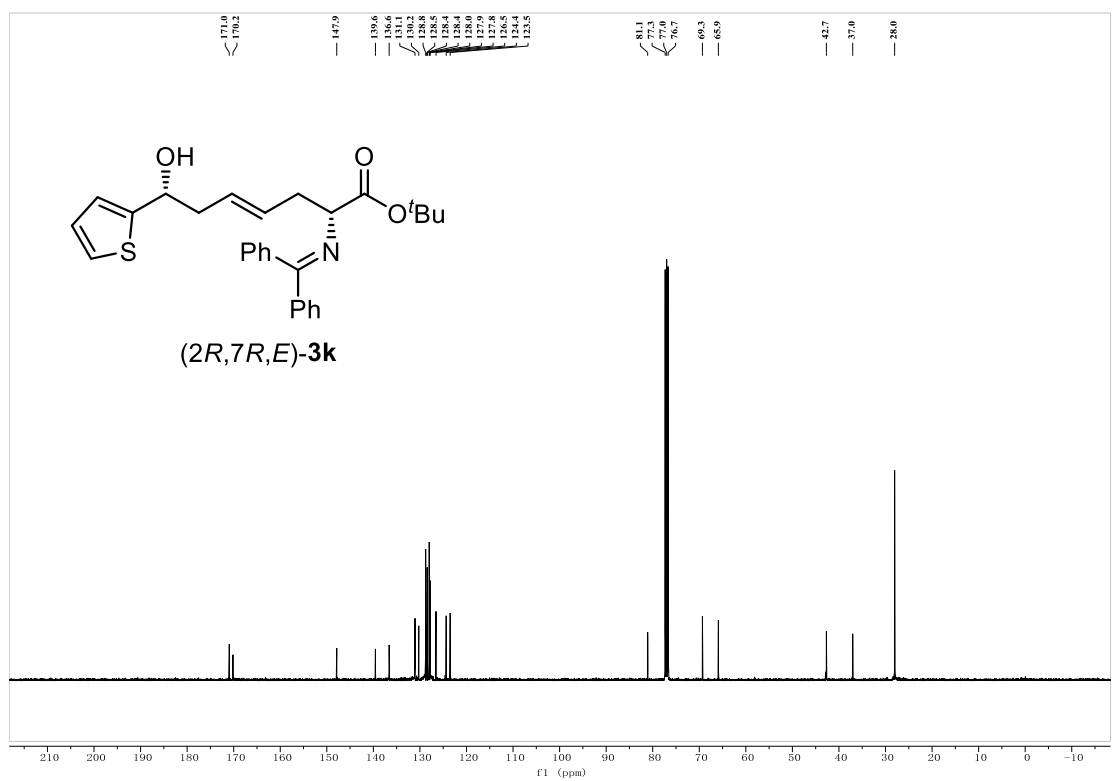

**<sup>13</sup>C NMR (101 MHz, CDCl<sub>3</sub>) of (2*R*,7*R*,*E*)-3k**

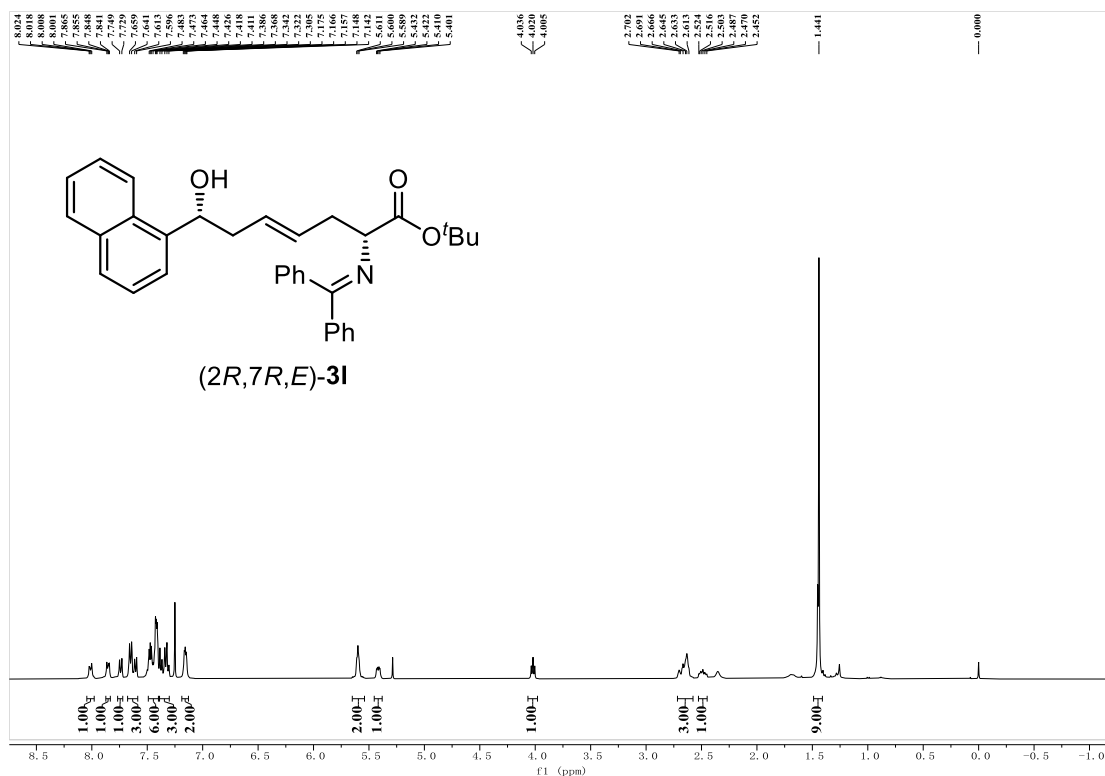

**<sup>1</sup>H NMR (400 MHz, CDCl<sub>3</sub>) of (2*R*,7*R*,*E*)-3I**

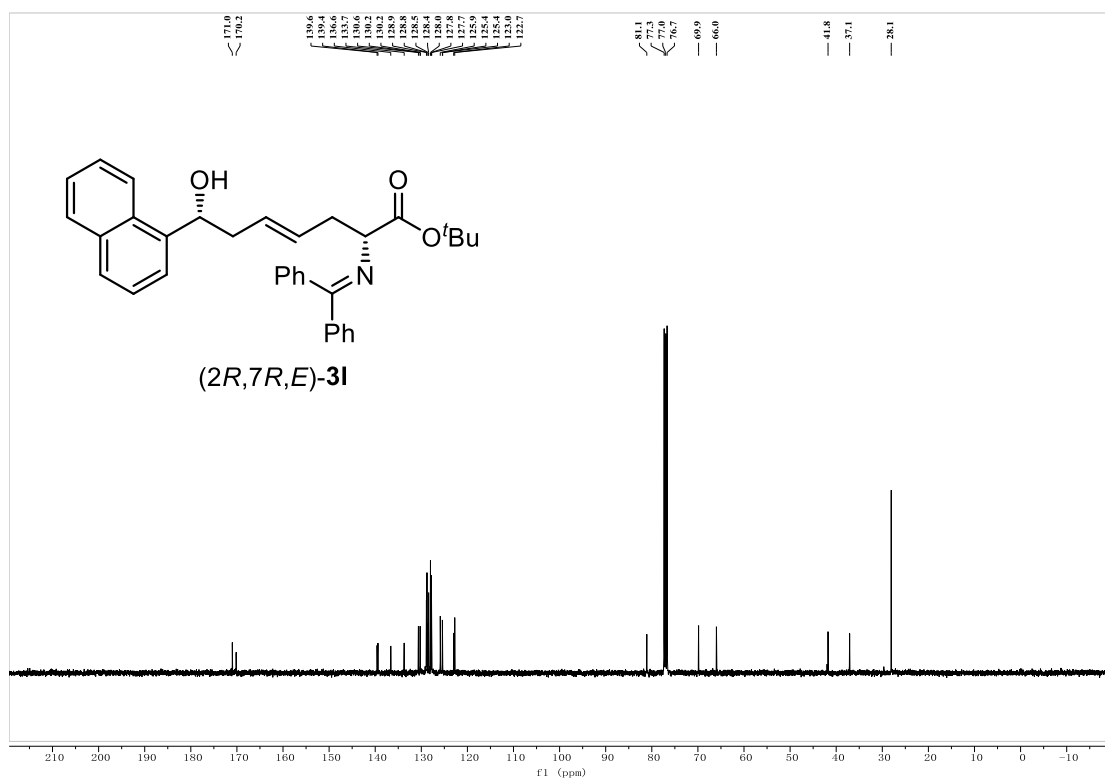

**<sup>13</sup>C NMR (101 MHz, CDCl<sub>3</sub>) of (2*R*,7*R*,*E*)-3I**

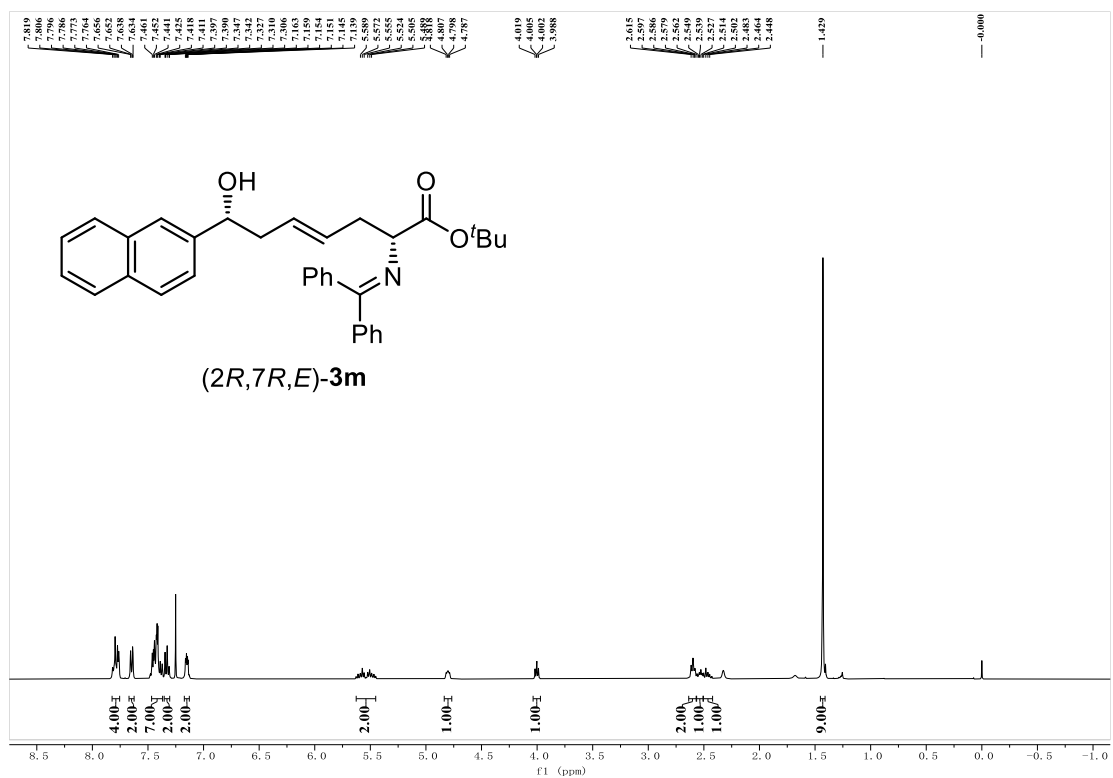

**<sup>1</sup>H NMR (400 MHz, CDCl<sub>3</sub>) of (2R,7R,E)-3m**

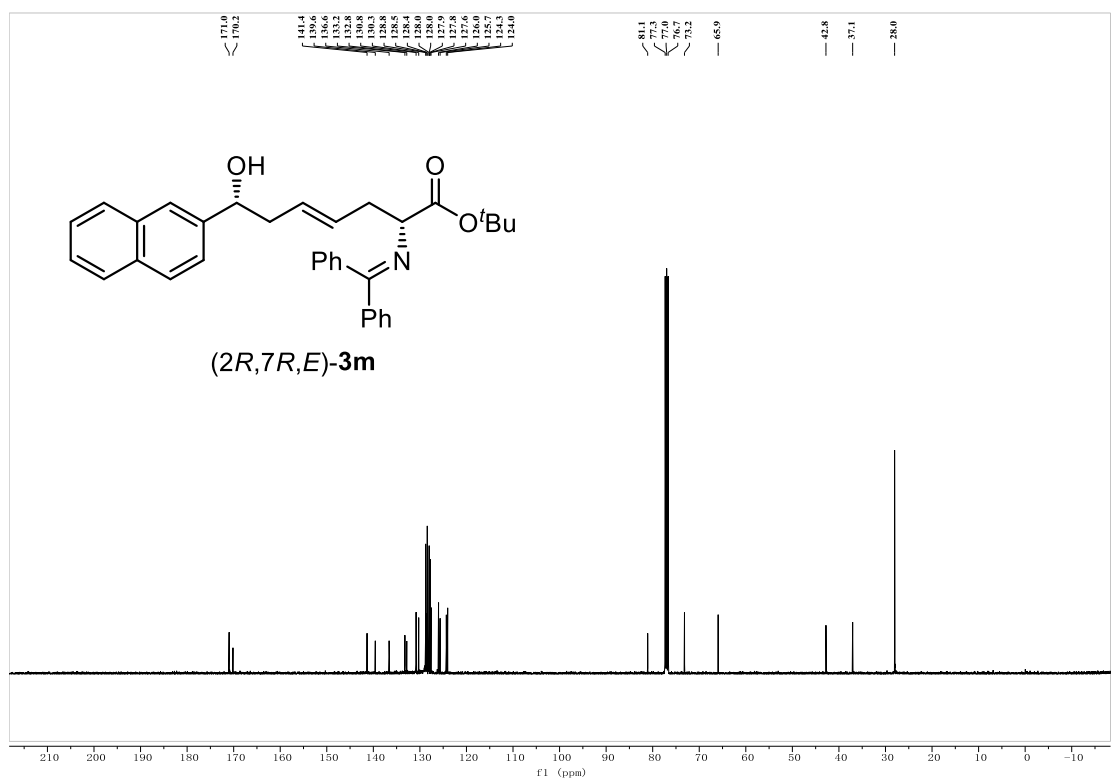

**<sup>13</sup>C NMR (101 MHz, CDCl<sub>3</sub>) of (2R,7R,E)-3m**

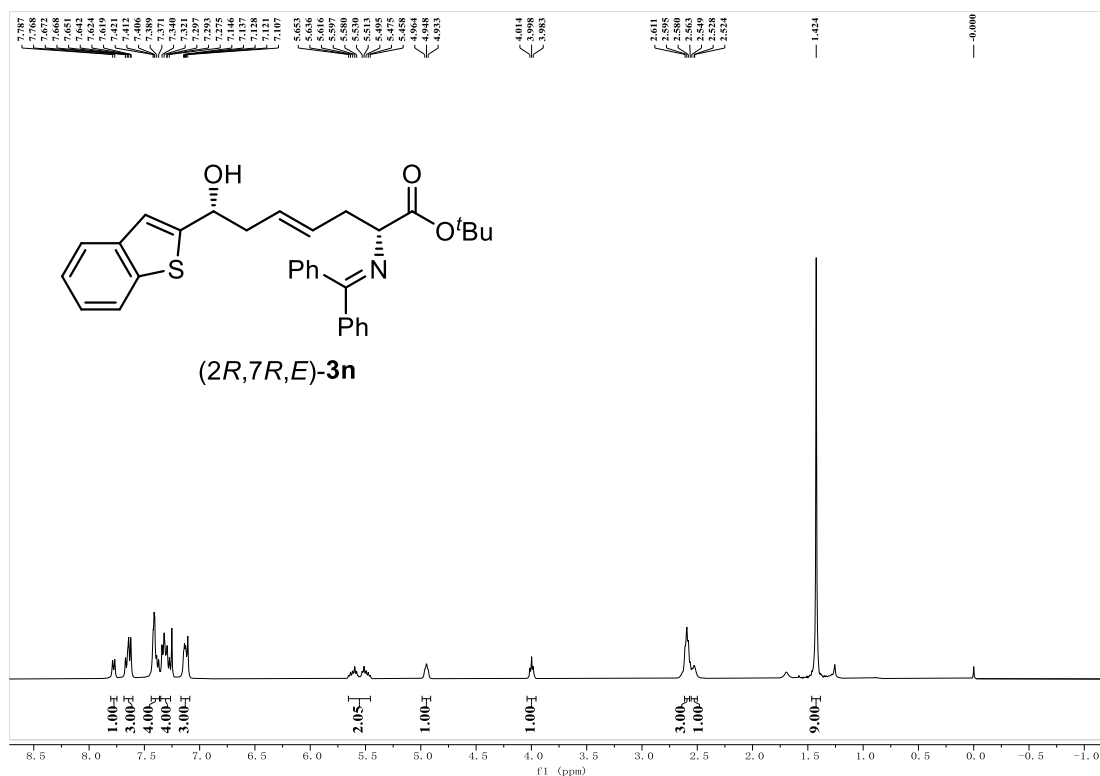

**<sup>1</sup>H NMR (400 MHz, CDCl<sub>3</sub>) of (2*R*,7*R*,*E*)-3n**

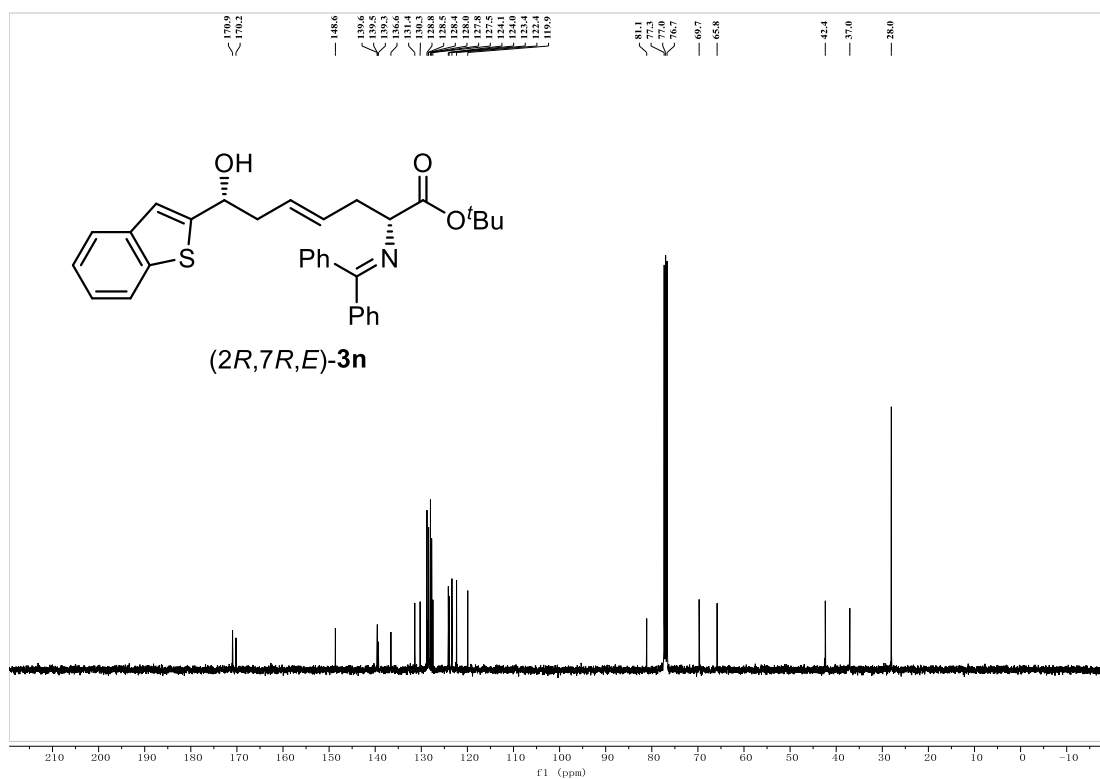

**<sup>13</sup>C NMR (101 MHz, CDCl<sub>3</sub>) of (2*R*,7*R*,*E*)-3n**



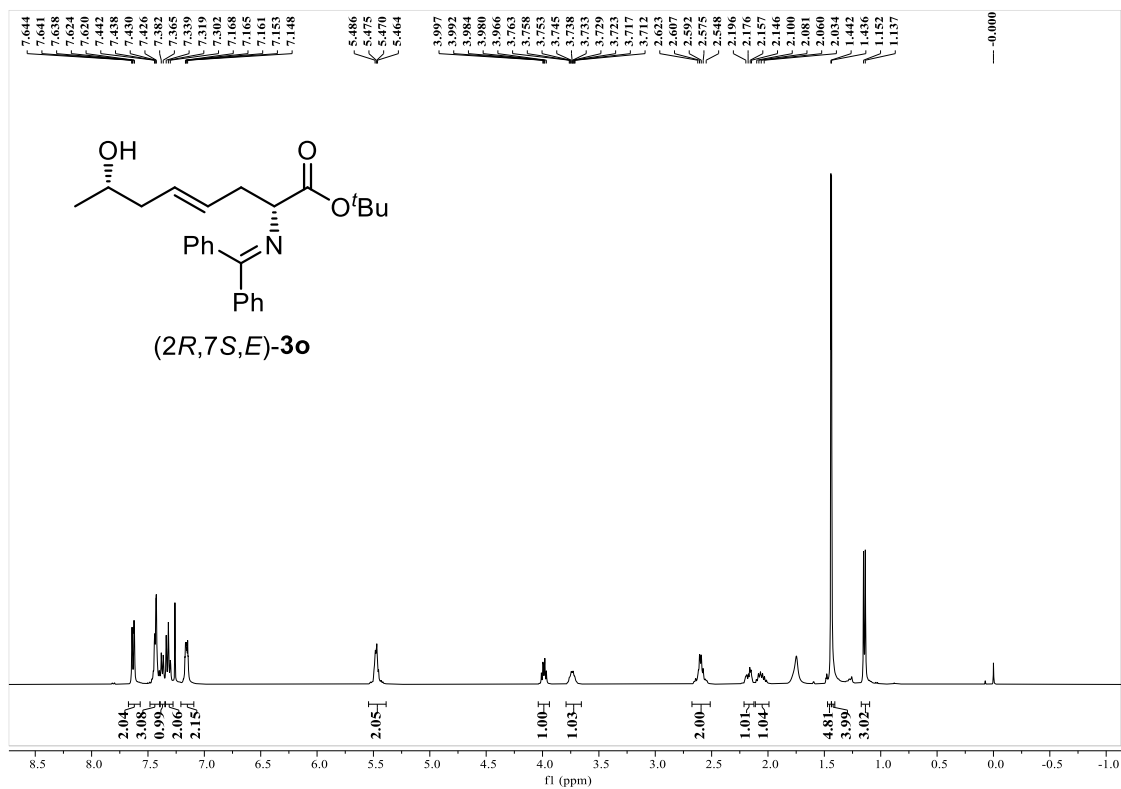

<sup>1</sup>H NMR (400 MHz, CDCl<sub>3</sub>) of (2R,7S,E)-3o

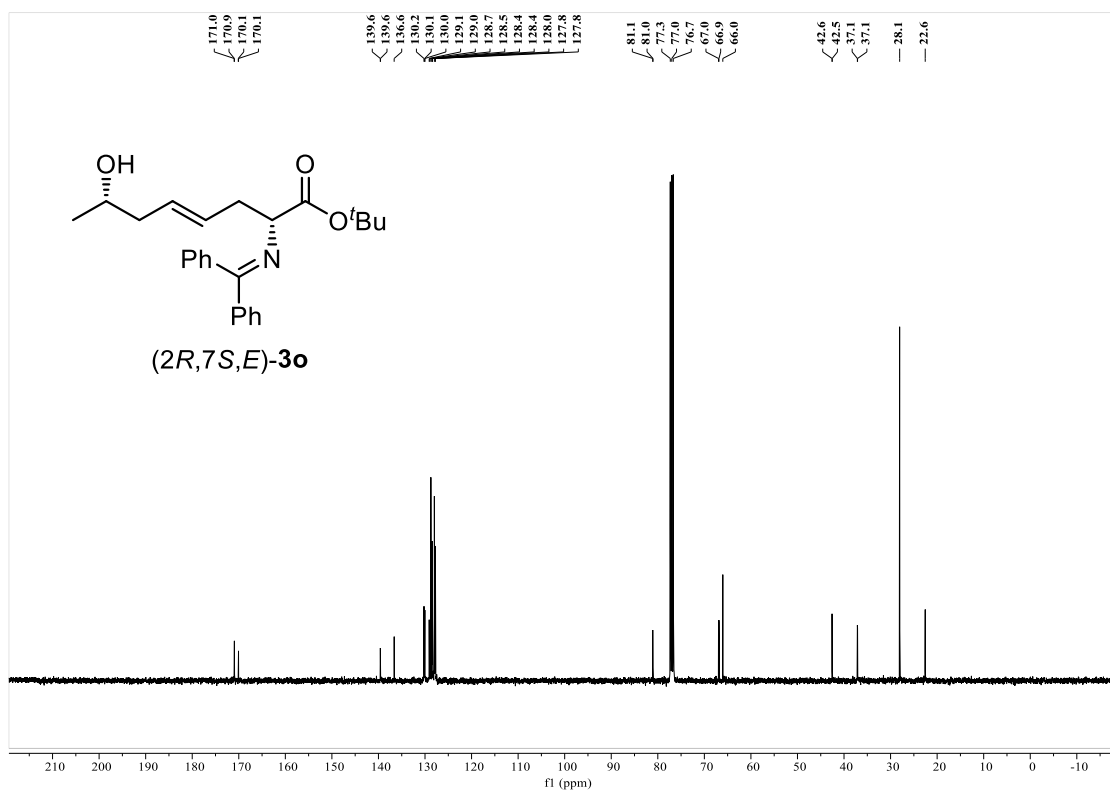

<sup>13</sup>C NMR (101 MHz, CDCl<sub>3</sub>) of (2R,7S,E)-3o

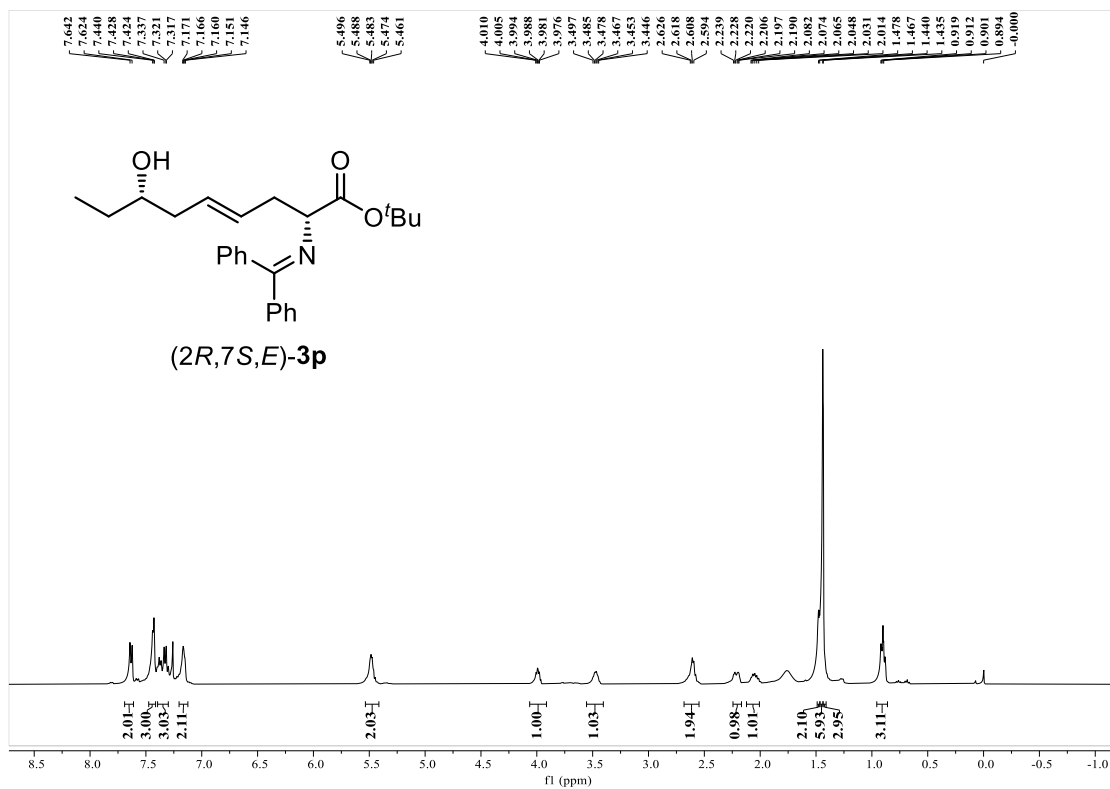

$^1\text{H}$  NMR (400 MHz,  $\text{CDCl}_3$ ) of **(2R,7S,E)-3p**

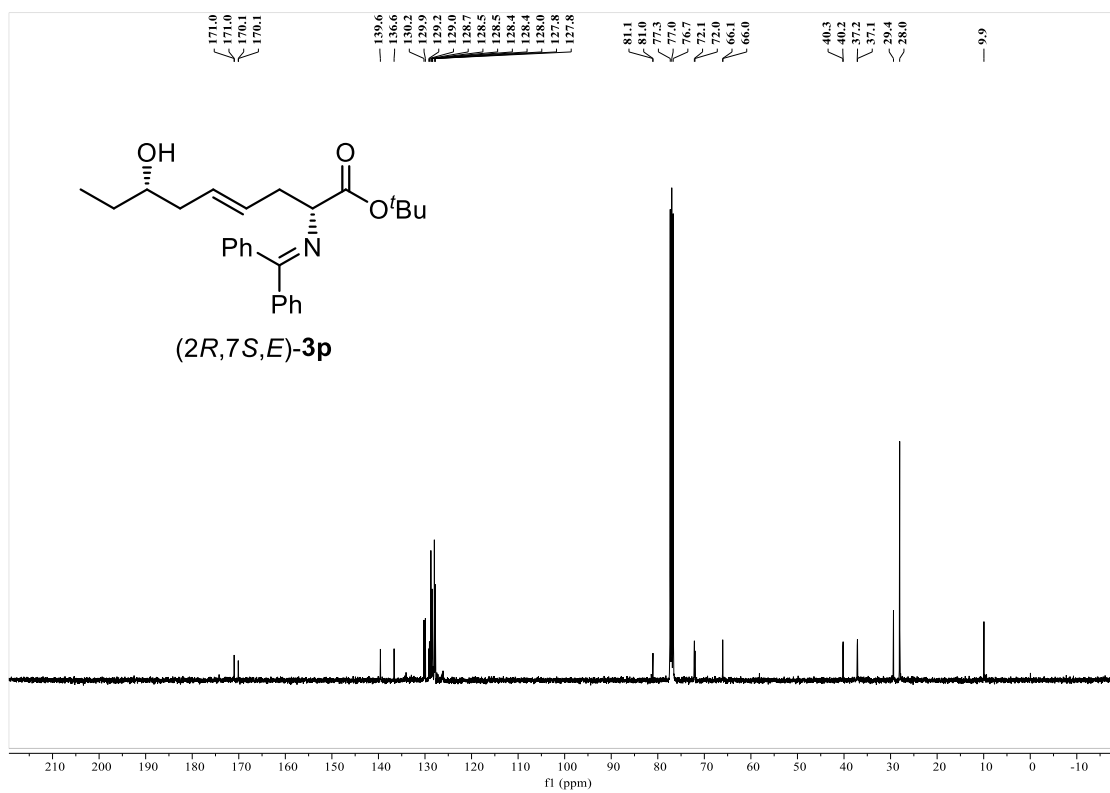

$^{13}\text{C}$  NMR (101 MHz,  $\text{CDCl}_3$ ) of **(2R,7S,E)-3p**

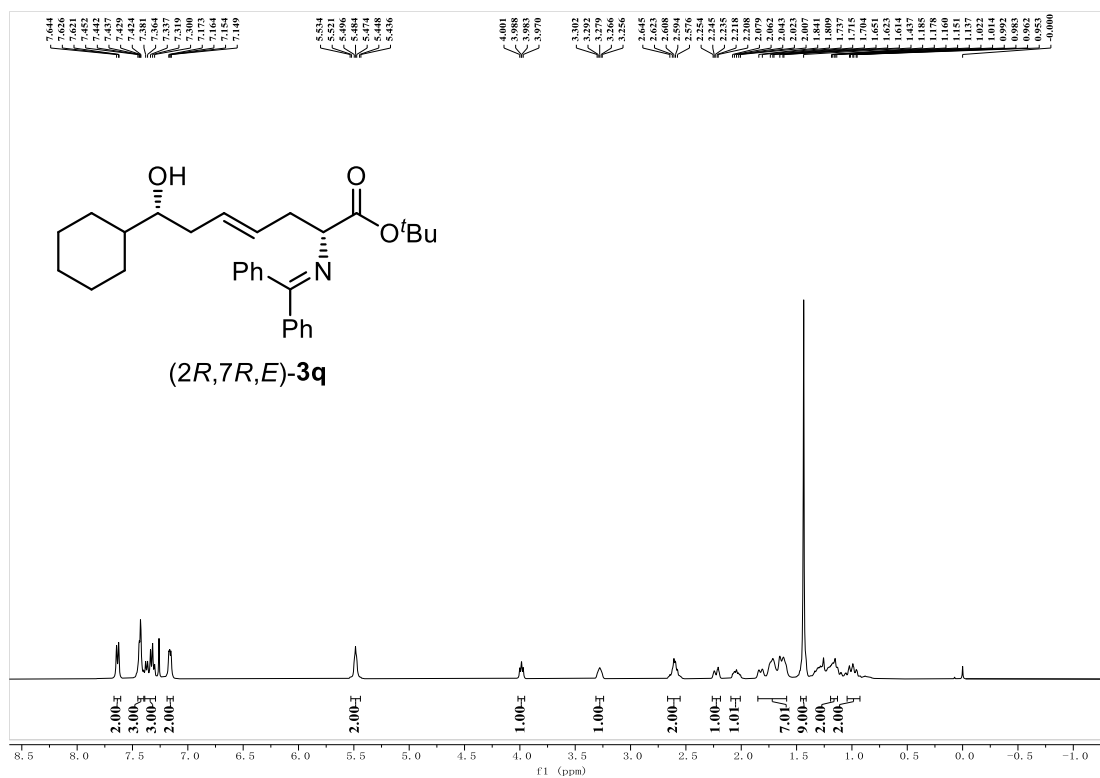

**<sup>1</sup>H NMR (400 MHz, CDCl<sub>3</sub>) of (2*R*,7*R*,*E*)-3q**

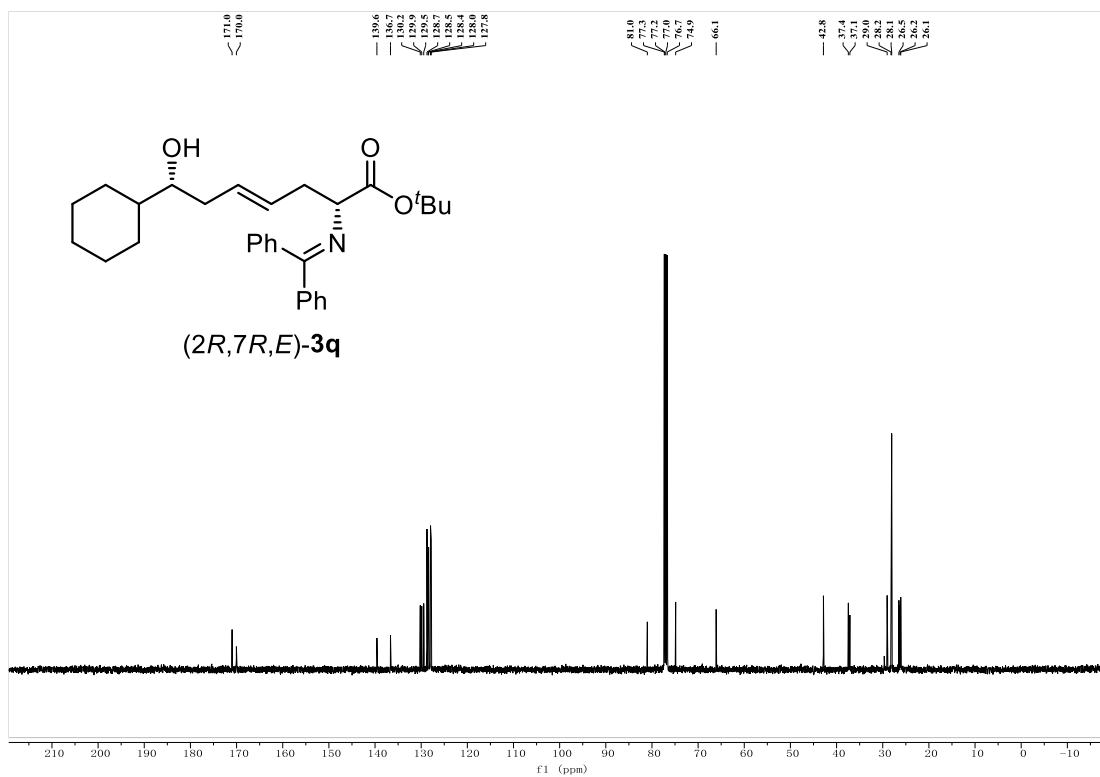

**<sup>13</sup>C NMR (101 MHz, CDCl<sub>3</sub>) of (2*R*,7*R*,*E*)-3q**

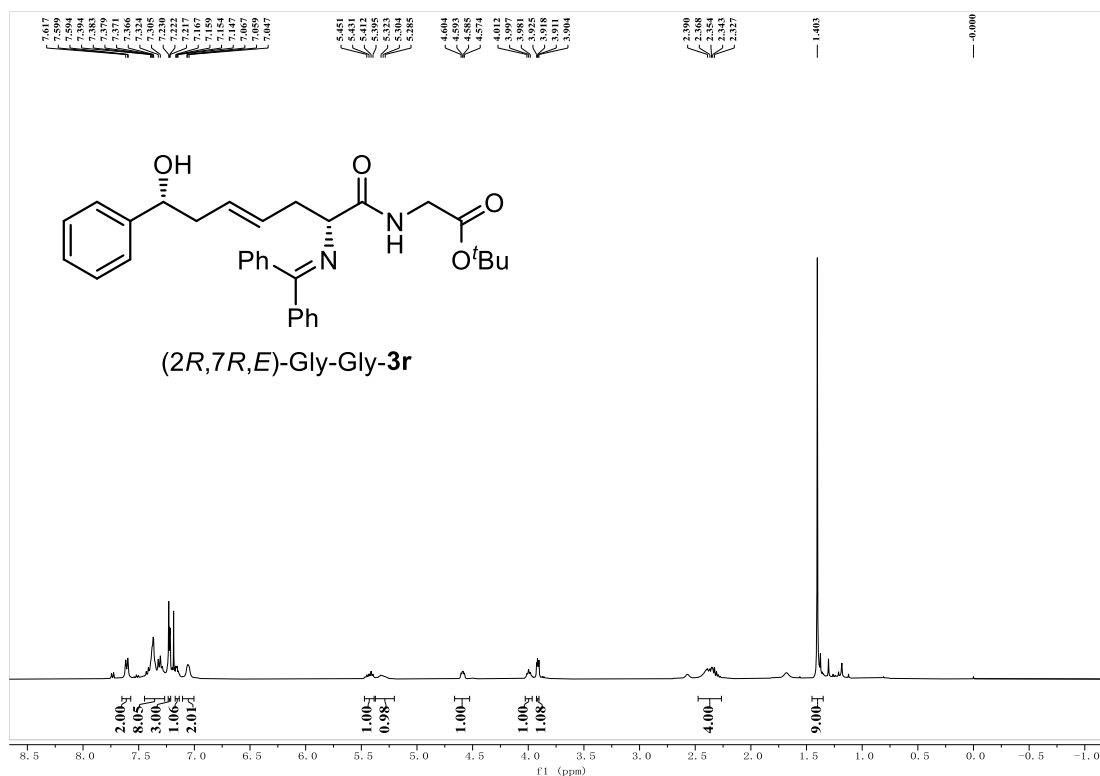

**<sup>1</sup>H NMR (400 MHz, CDCl<sub>3</sub>) of (2R,7R,E)-3r**

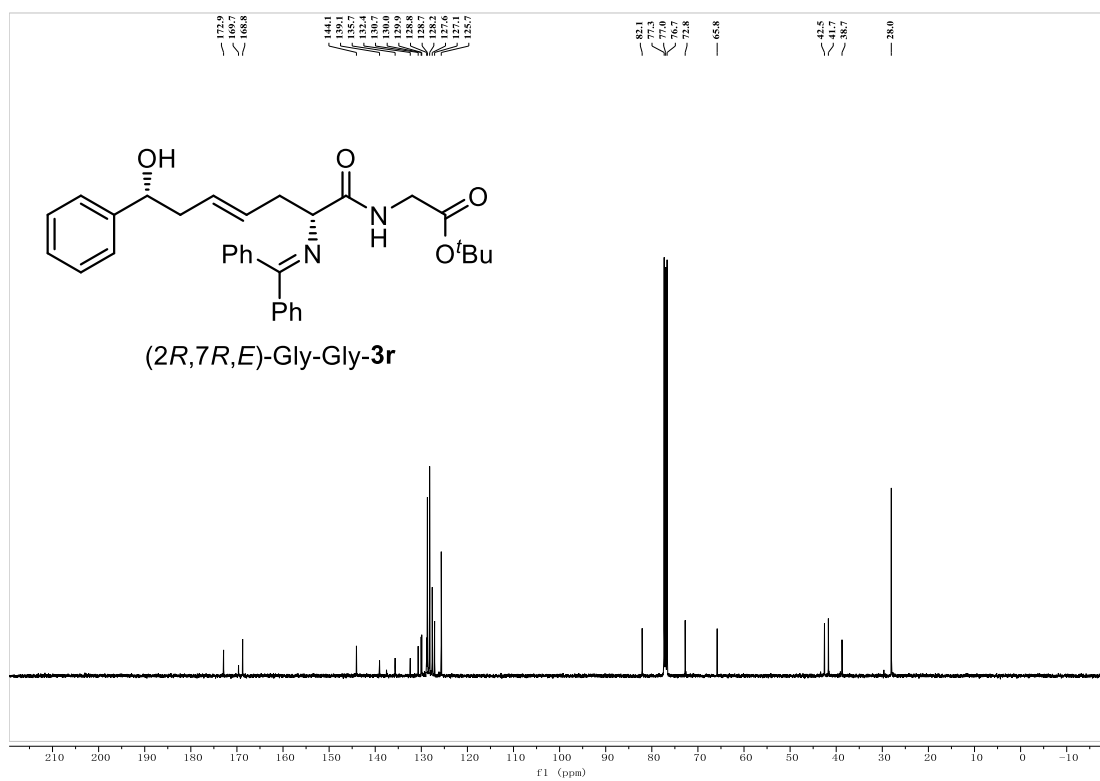

**<sup>13</sup>C NMR (101 MHz, CDCl<sub>3</sub>) of (2R,7R,E)-3r**

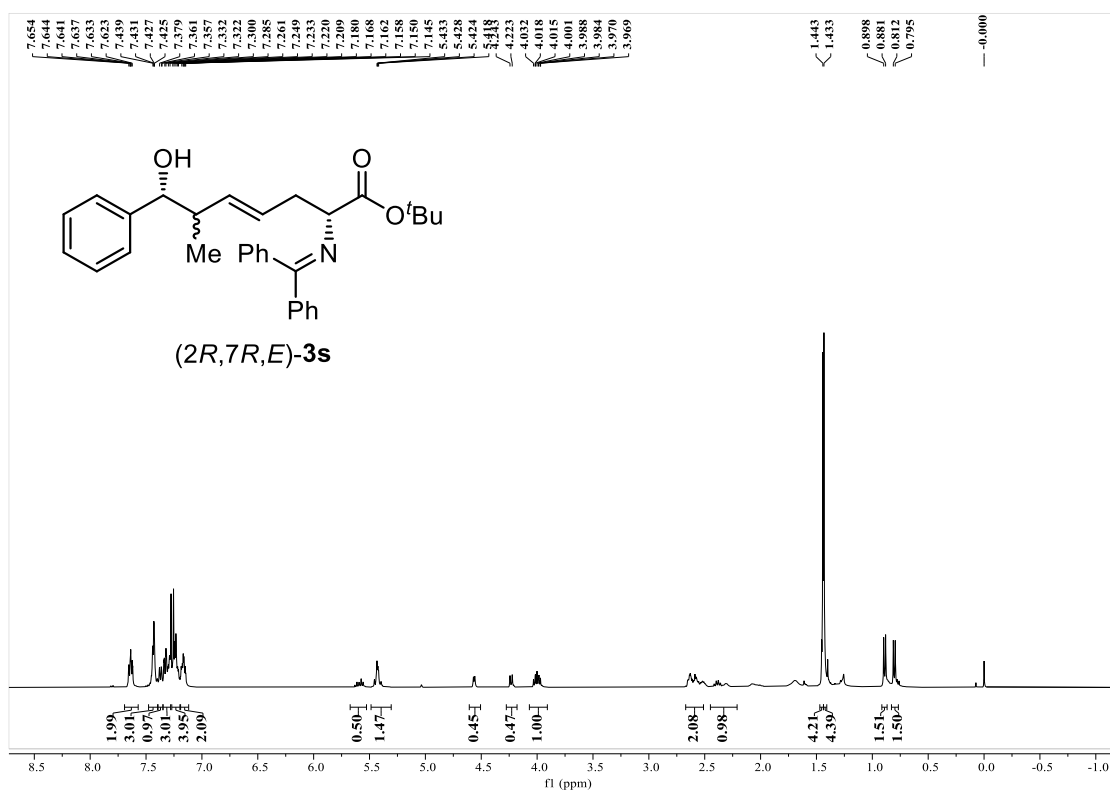

**<sup>1</sup>H NMR (400 MHz, CDCl<sub>3</sub>) of (2*R*,7*R*,*E*)-3s**

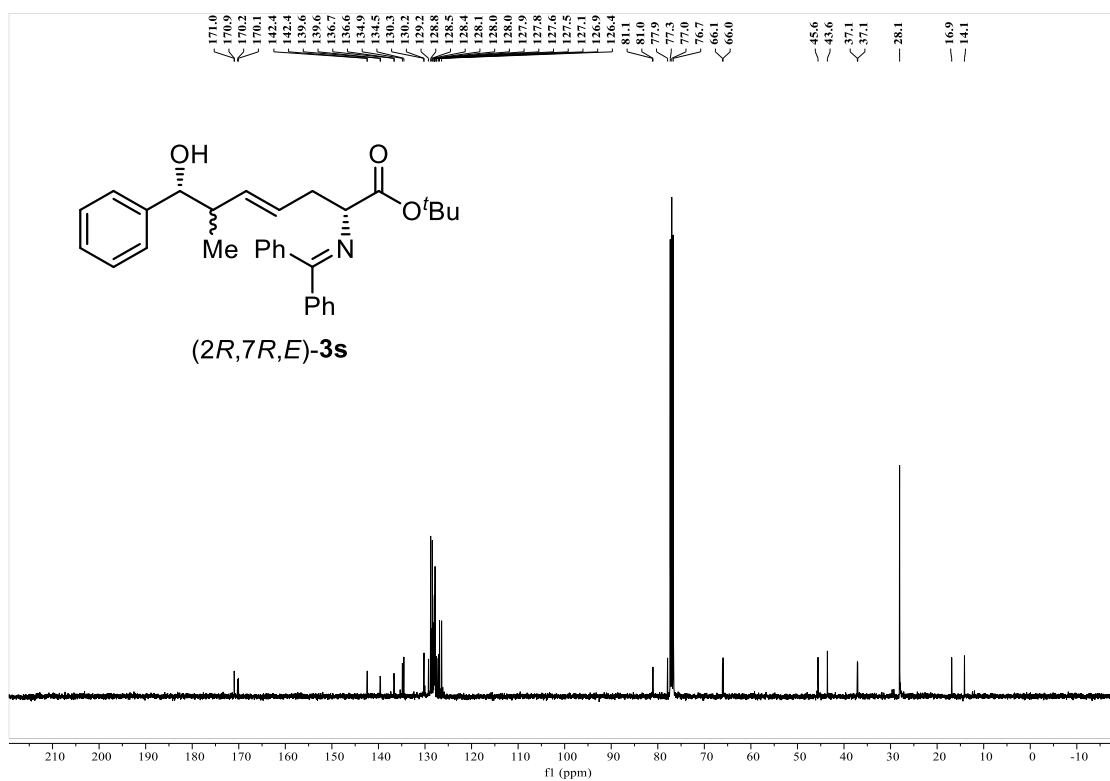

**<sup>13</sup>C NMR (101 MHz, CDCl<sub>3</sub>) of (2*R*,7*R*,*E*)-3s**

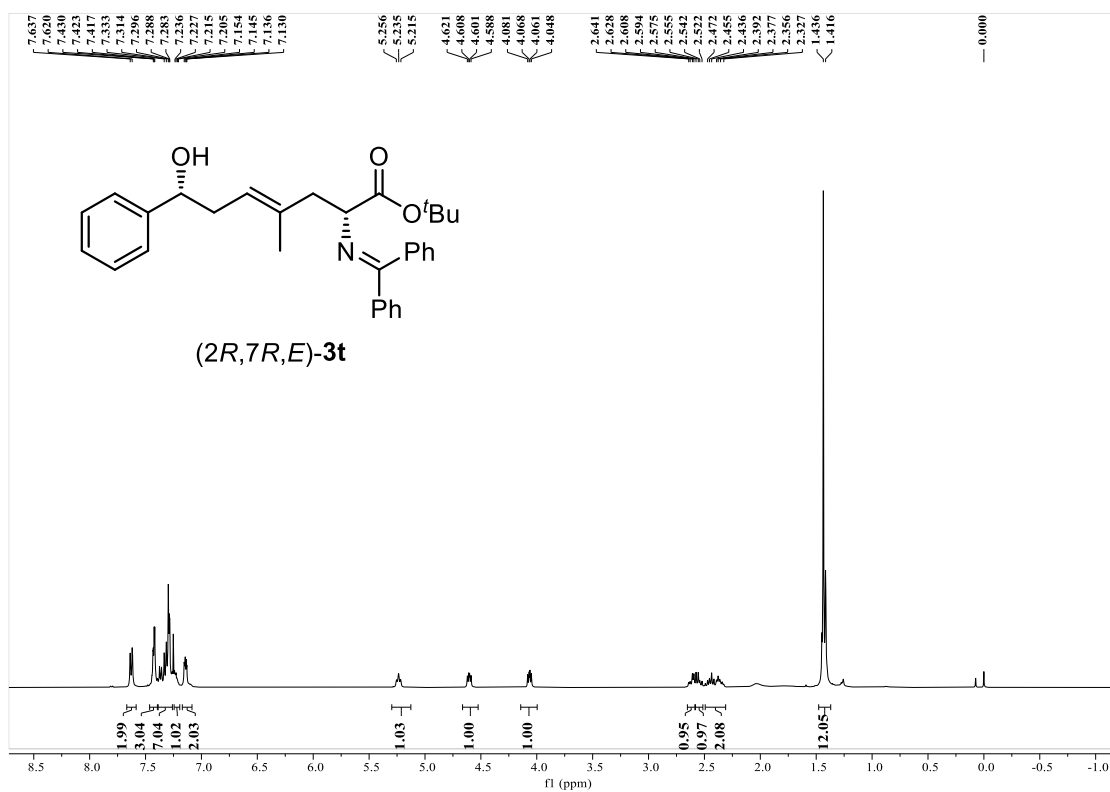

$^1\text{H NMR}$  (400 MHz,  $\text{CDCl}_3$ ) of **(2R,7R,E)-3t**

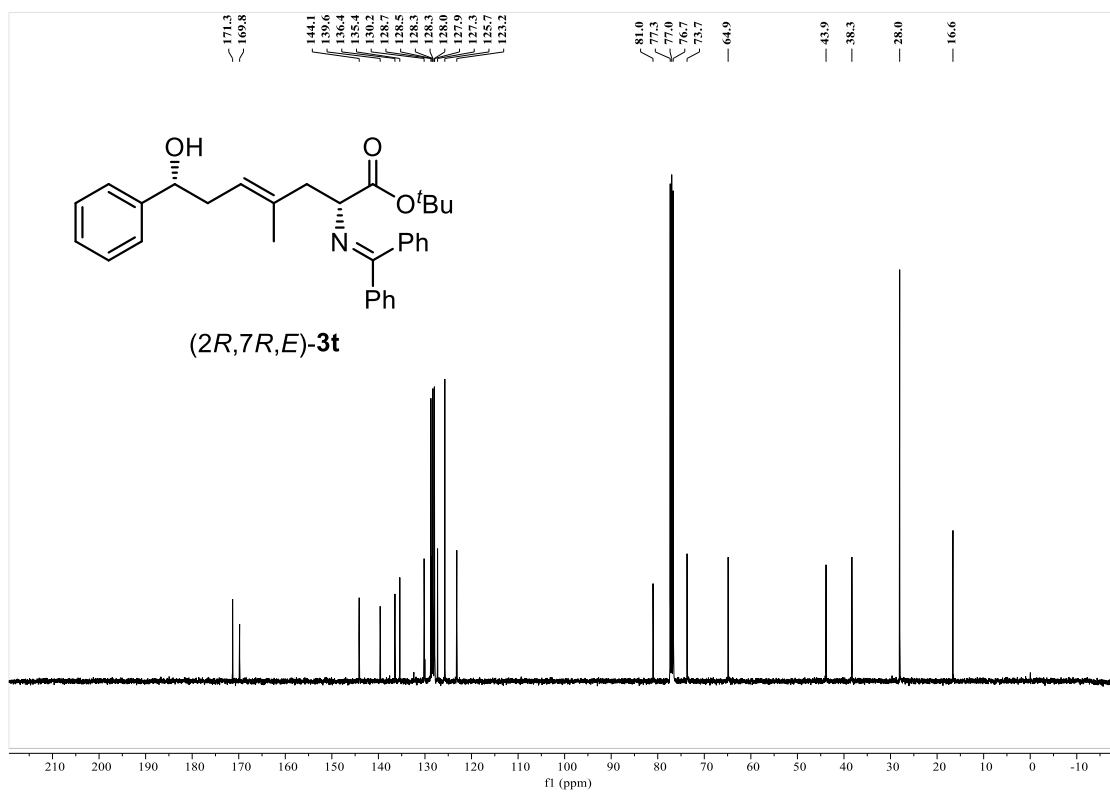

$^{13}\text{C NMR}$  (101 MHz,  $\text{CDCl}_3$ ) of **(2R,7R,E)-3t**

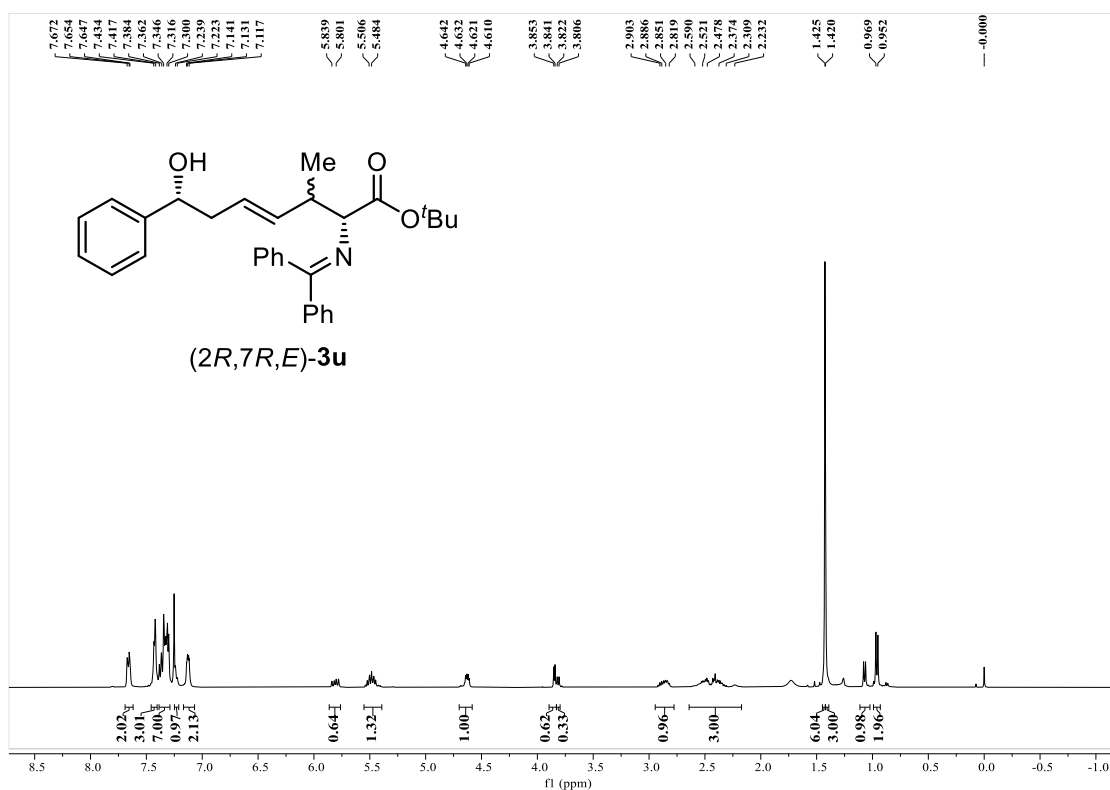

**<sup>1</sup>H NMR (400 MHz, CDCl<sub>3</sub>) of (2*R*,7*R*,*E*)-3u**

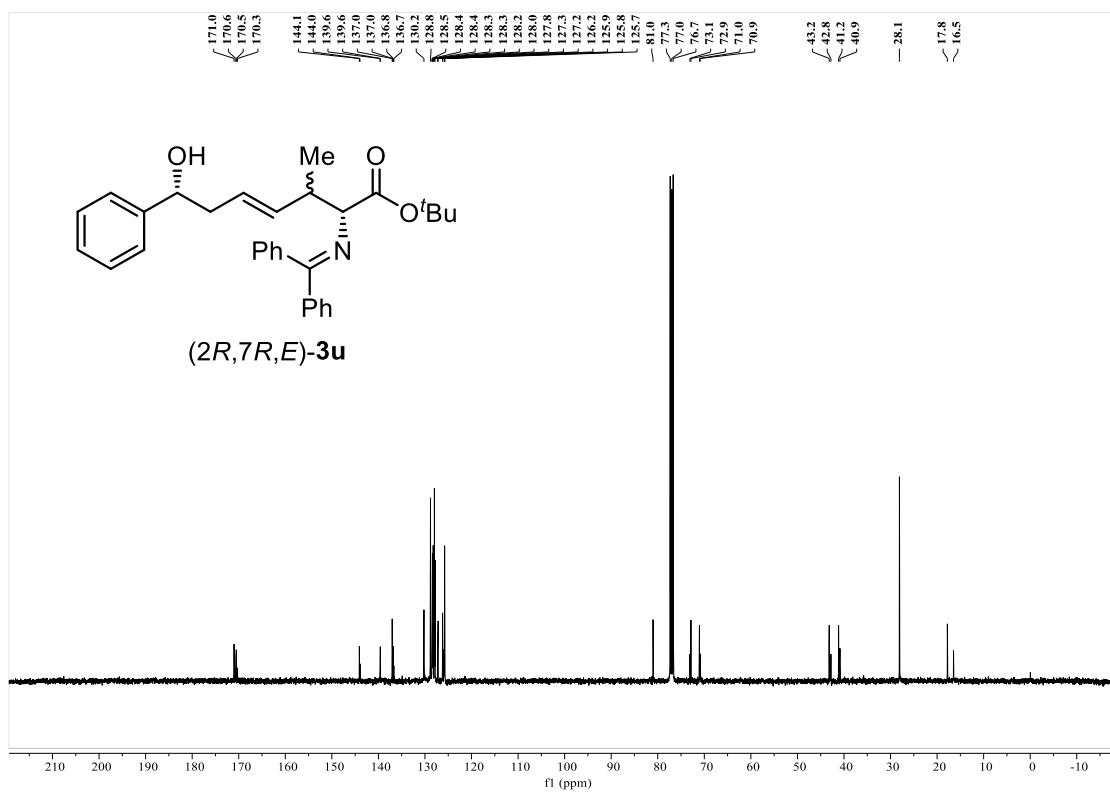

**<sup>13</sup>C NMR (101 MHz, CDCl<sub>3</sub>) of (2*R*,7*R*,*E*)-3u**

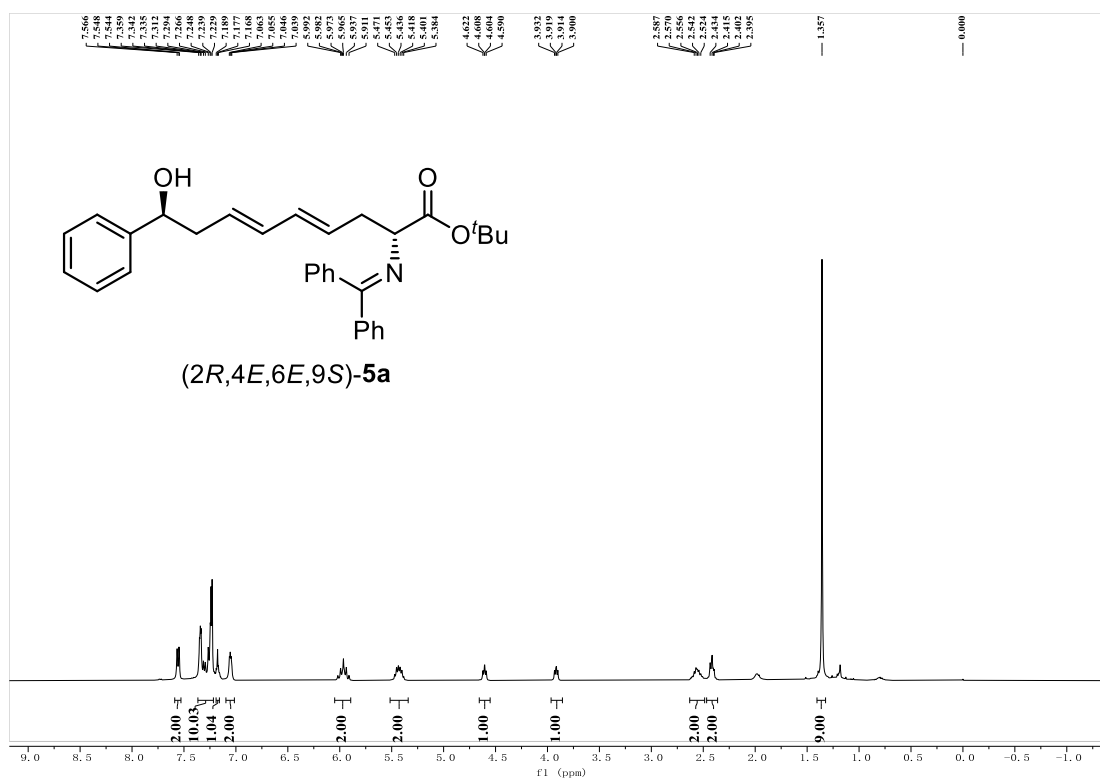

**<sup>1</sup>H NMR (400 MHz, CDCl<sub>3</sub>) of (2R,4E,6E,9S)-5a**

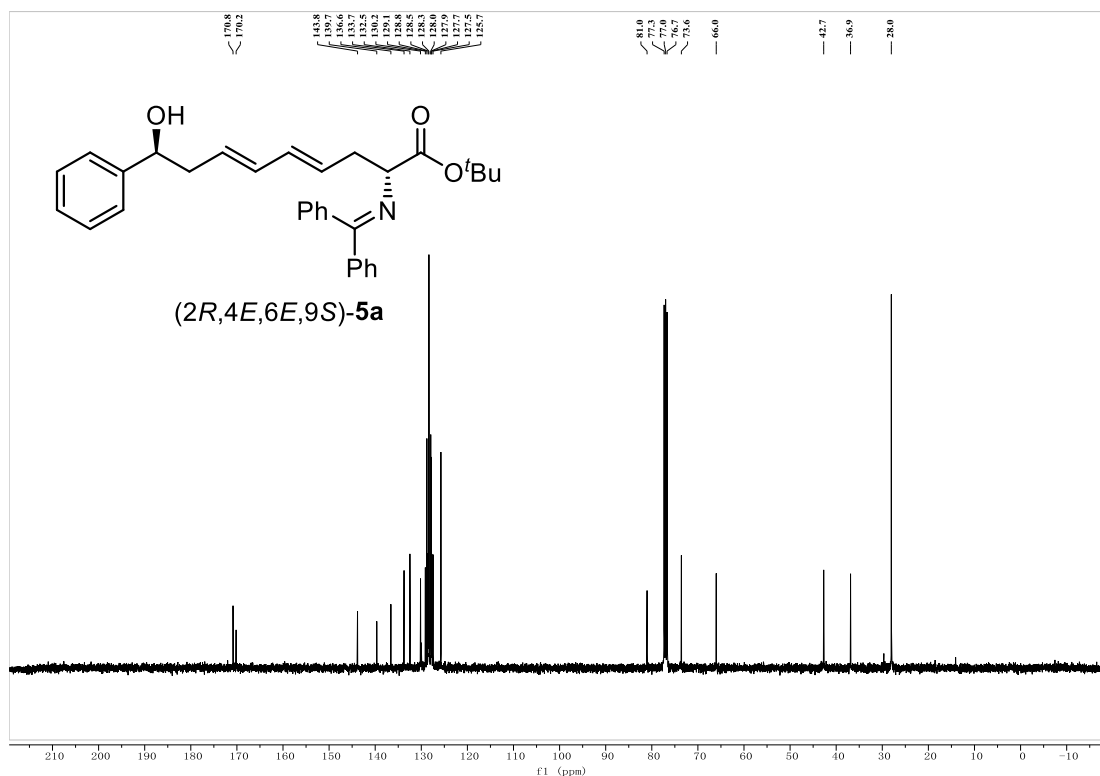

**<sup>13</sup>C NMR (101 MHz, CDCl<sub>3</sub>) of (2R,4E,6E,9S)-5a**



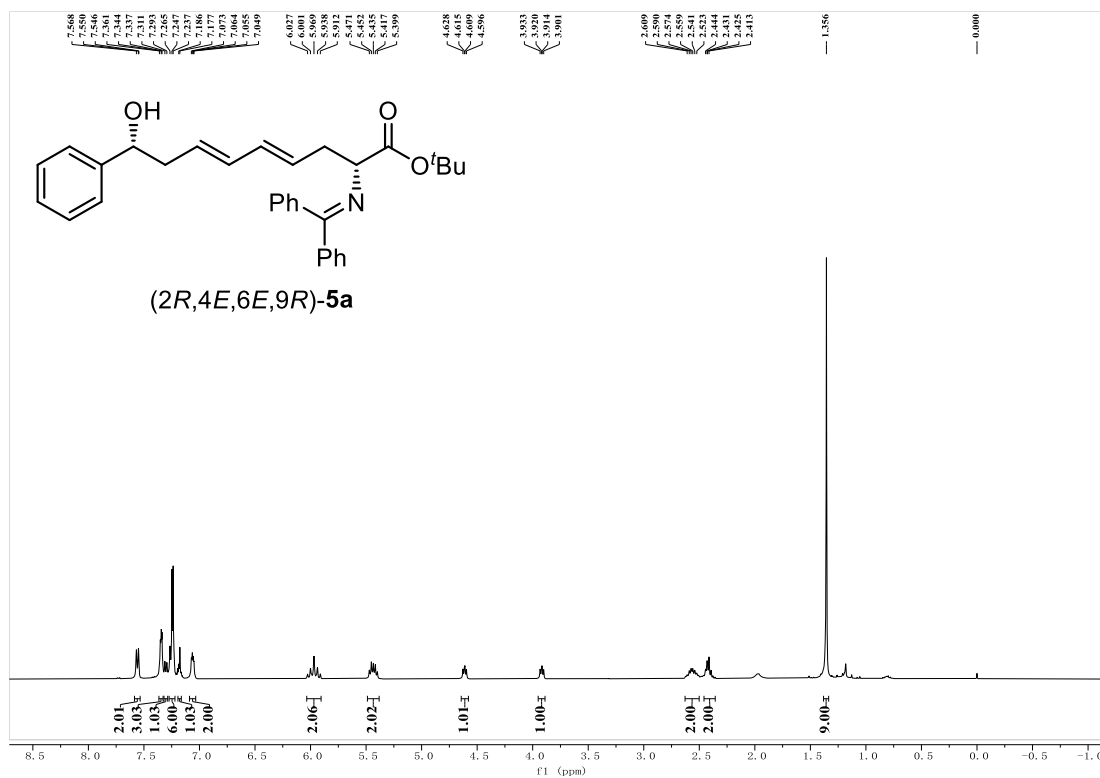

$^1\text{H NMR}$  (400 MHz,  $\text{CDCl}_3$ ) of (2*R*,4*E*,6*E*,9*R*)-**5a**

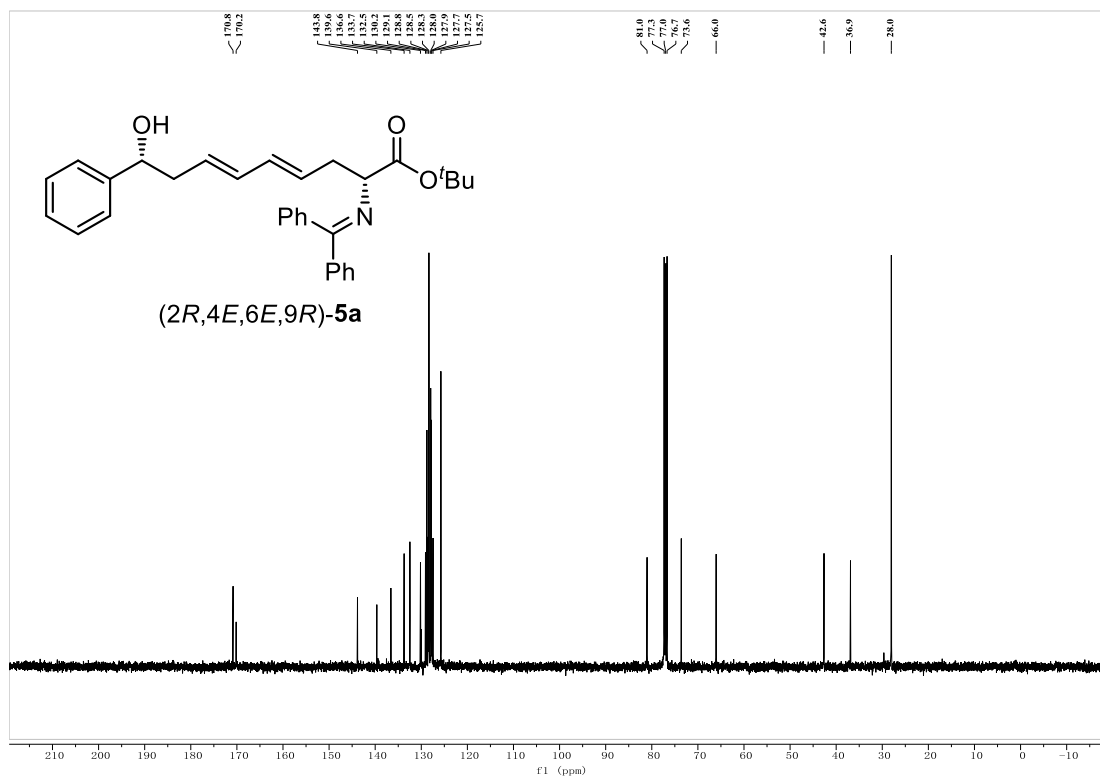

$^{13}\text{C NMR}$  (101 MHz,  $\text{CDCl}_3$ ) of (2*R*,4*E*,6*E*,9*R*)-**5a**

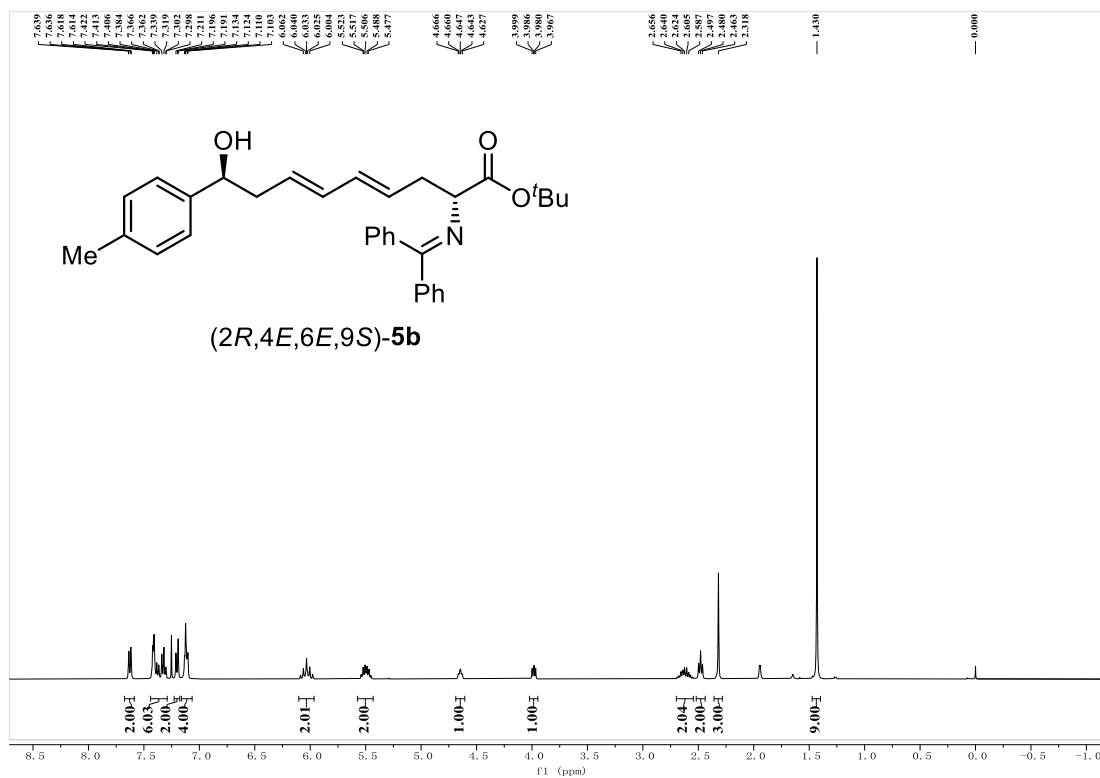

$^1\text{H NMR}$  (400 MHz,  $\text{CDCl}_3$ ) of **(2R,4E,6E,9S)-5b**

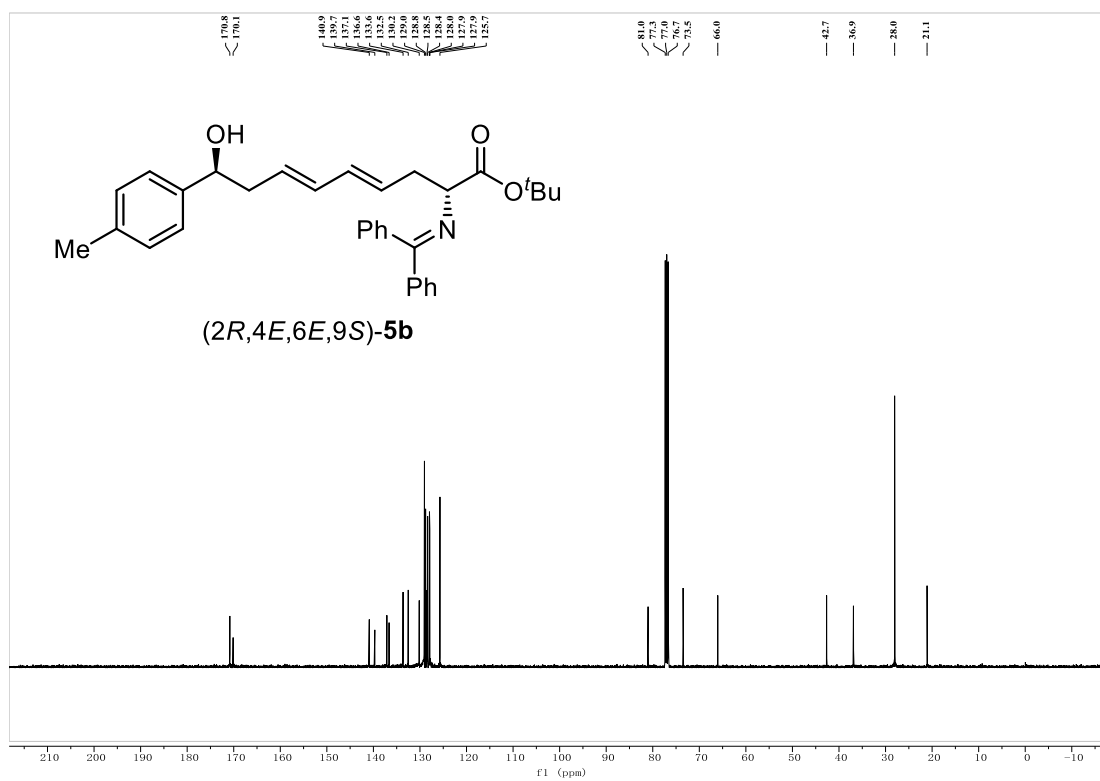

$^{13}\text{C NMR}$  (101 MHz,  $\text{CDCl}_3$ ) of **(2R,4E,6E,9S)-5b**

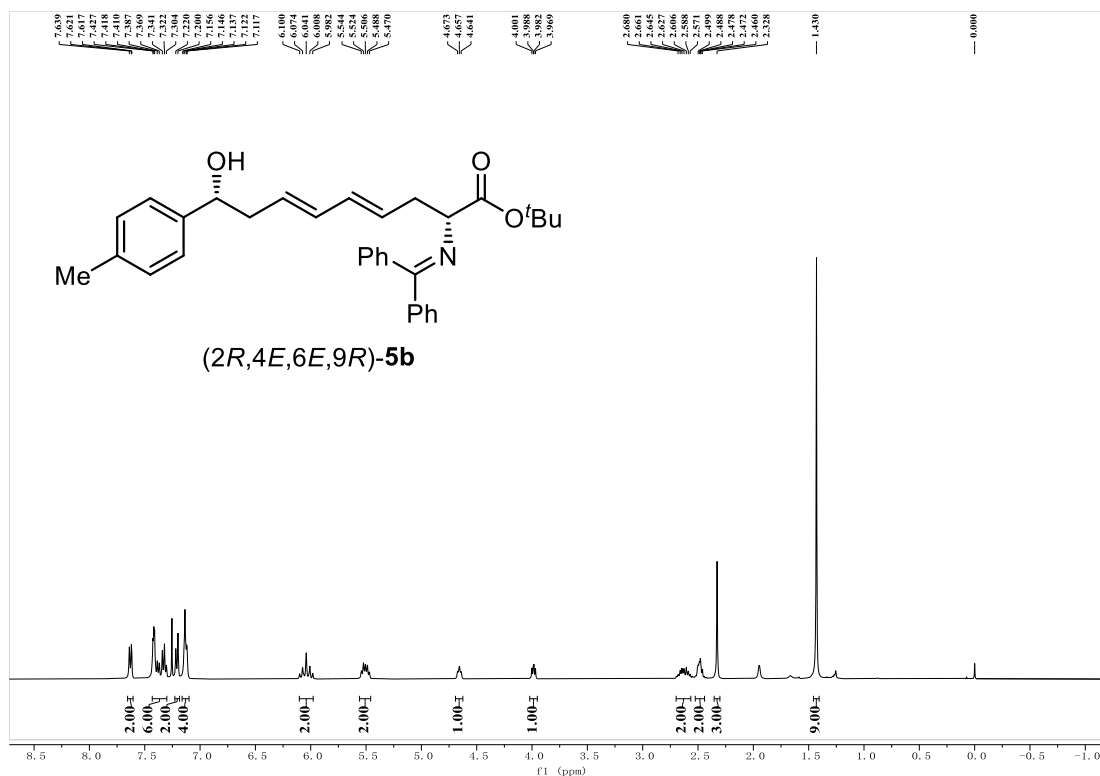

$^1\text{H}$  NMR (400 MHz,  $\text{CDCl}_3$ ) of (2*R*,4*E*,6*E*,9*R*)-**5b**

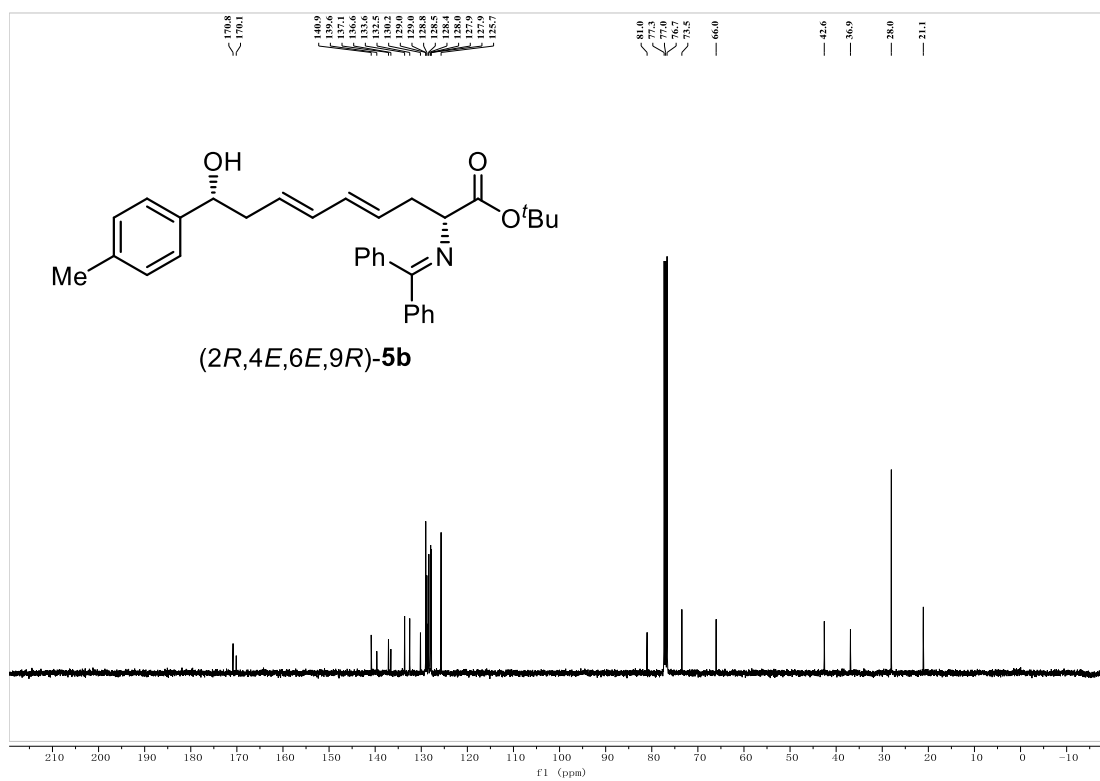

$^{13}\text{C}$  NMR (101 MHz,  $\text{CDCl}_3$ ) of (2*R*,4*E*,6*E*,9*R*)-**5b**

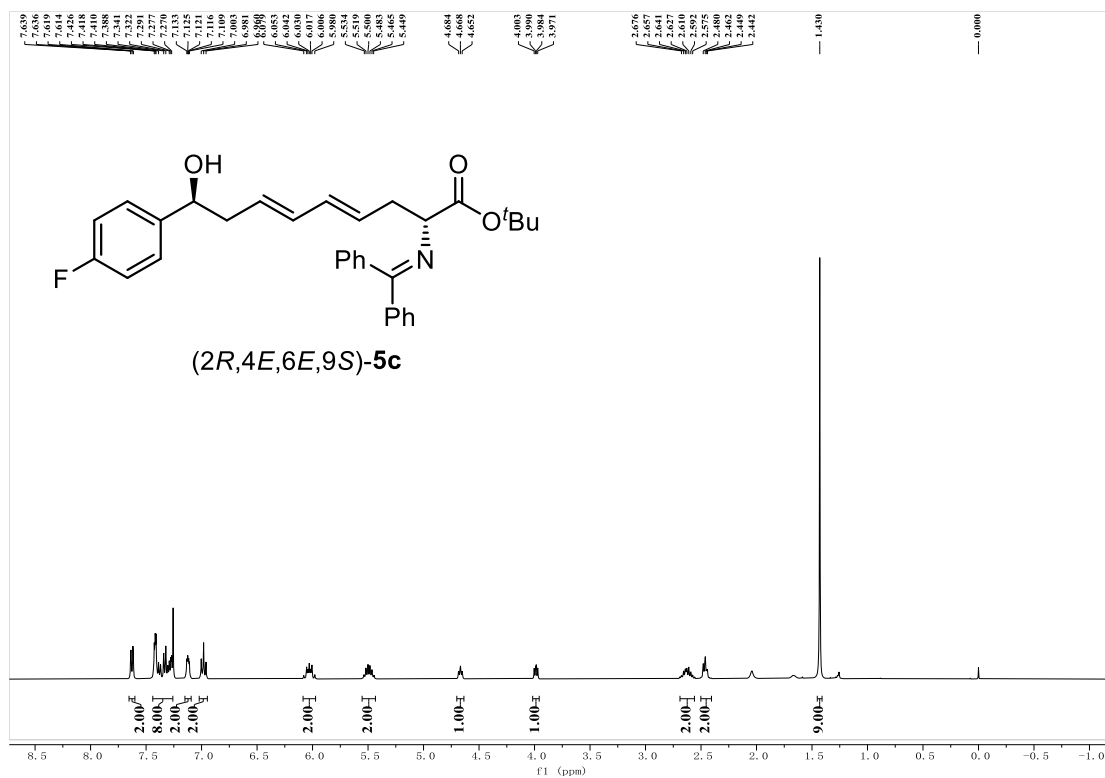

**<sup>1</sup>H NMR (400 MHz, CDCl<sub>3</sub>) of (2*R*,4*E*,6*E*,9*S*)-5c**

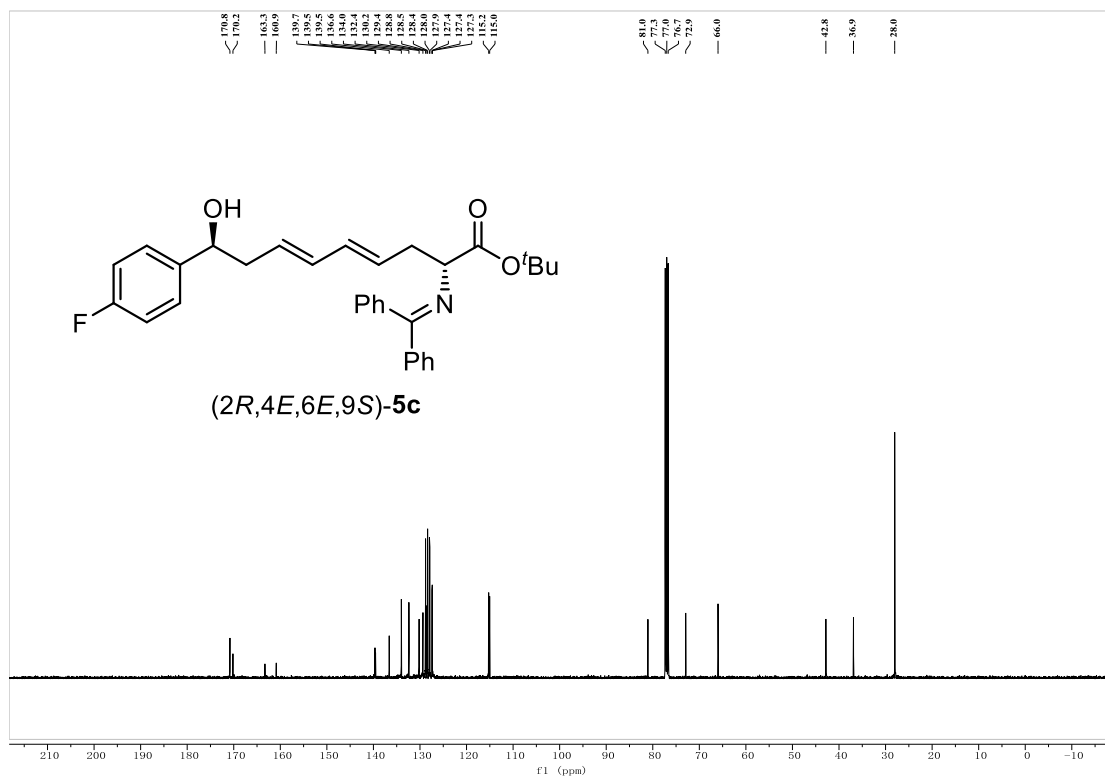

**<sup>13</sup>C NMR (101 MHz, CDCl<sub>3</sub>) of (2*R*,4*E*,6*E*,9*S*)-5c**

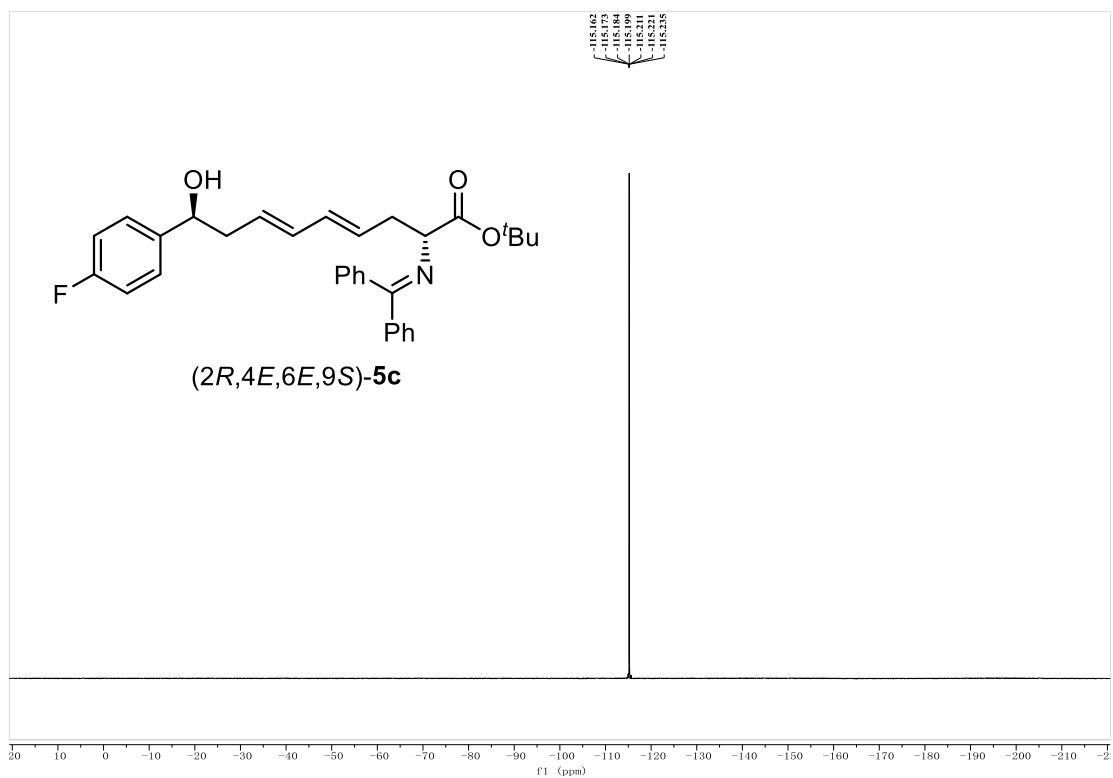

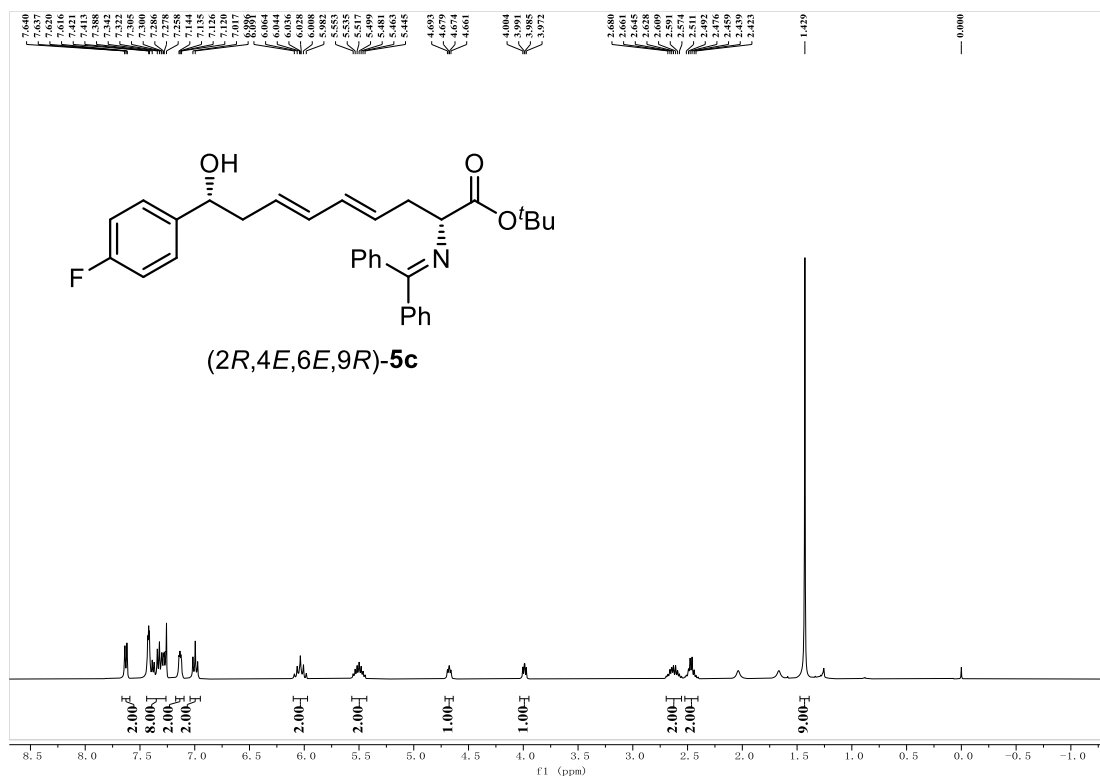

<sup>1</sup>H NMR (400 MHz, CDCl<sub>3</sub>) of (2R,4E,6E,9R)-5c

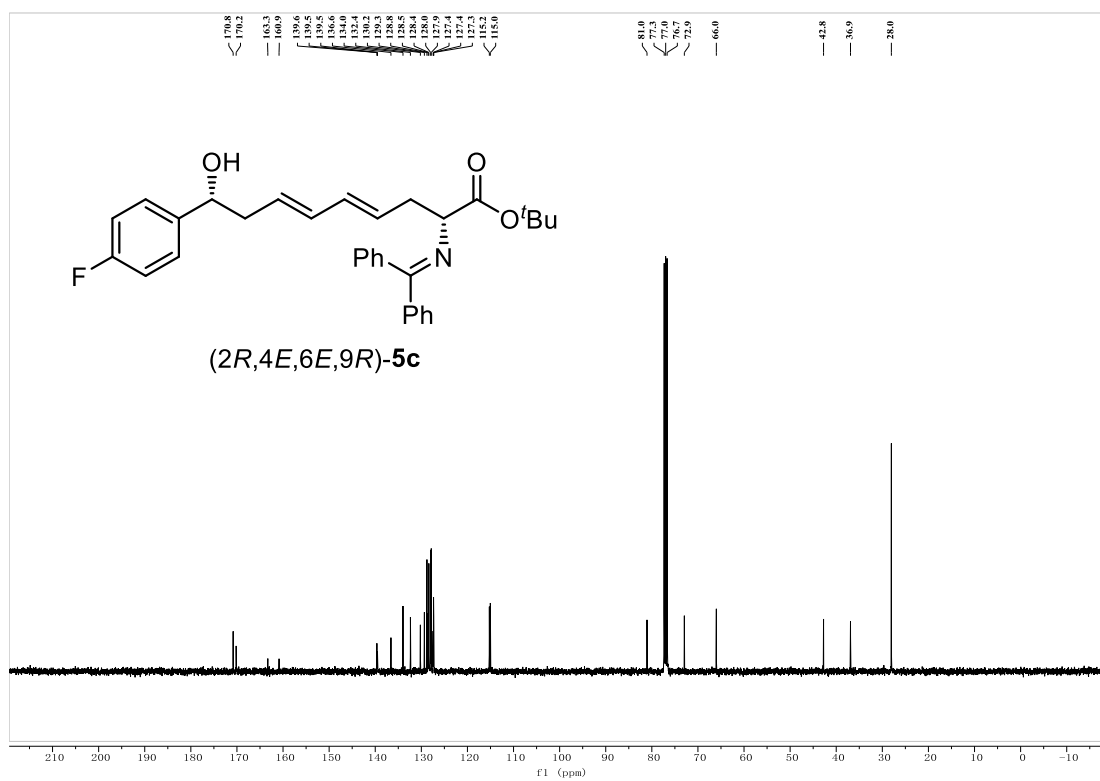

<sup>13</sup>C NMR (101 MHz, CDCl<sub>3</sub>) of (2R,4E,6E,9R)-5c

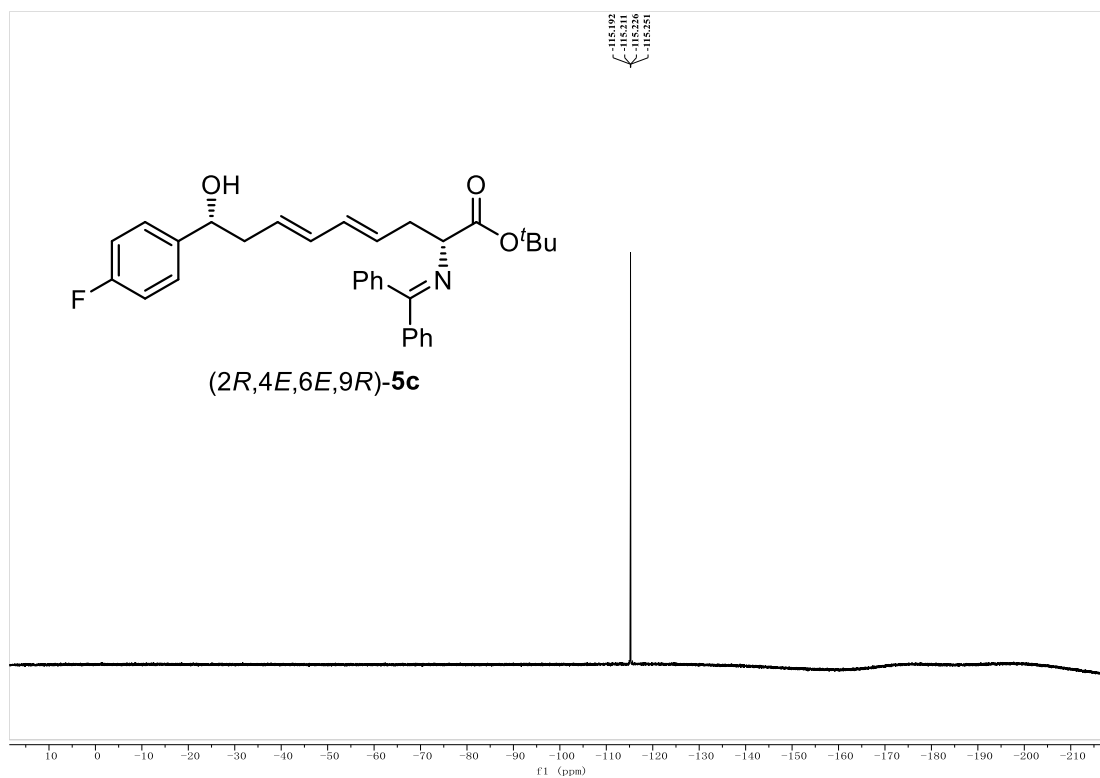

**<sup>19</sup>F NMR (376 MHz, CDCl<sub>3</sub>) of (2R,4E,6E,9R)-5c**

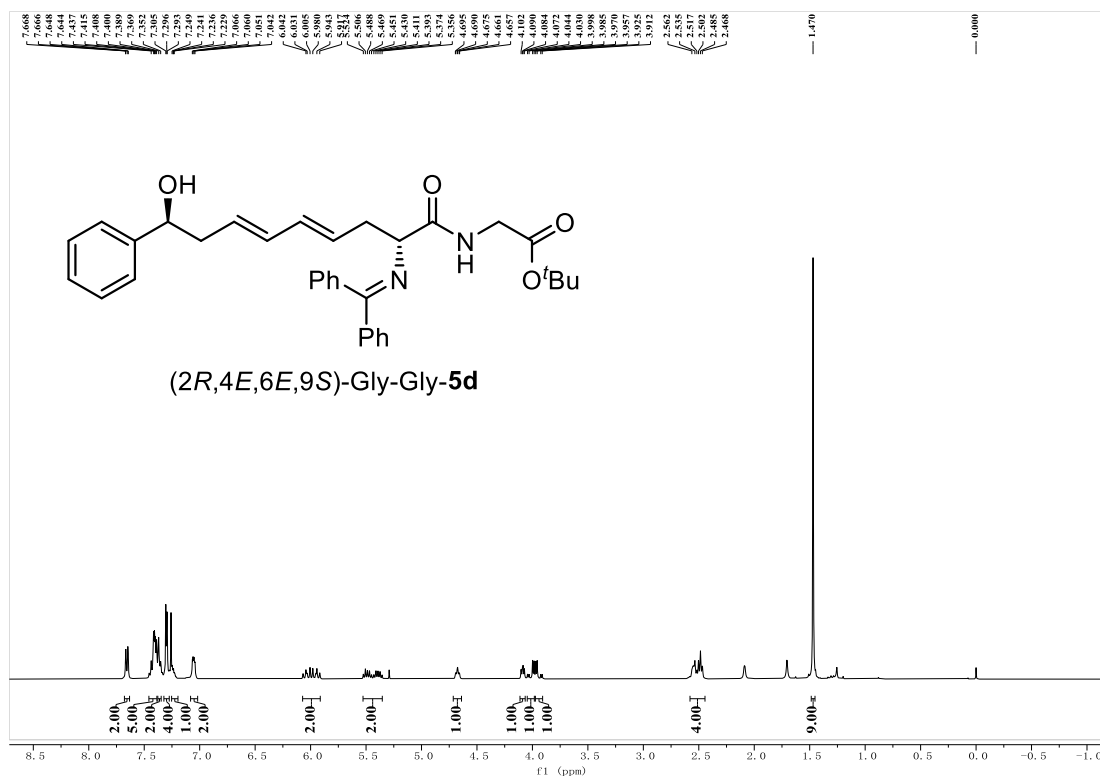

<sup>1</sup>H NMR (400 MHz, CDCl<sub>3</sub>) of (2*R*,4*E*,6*E*,9*S*)-Gly-Gly-5d

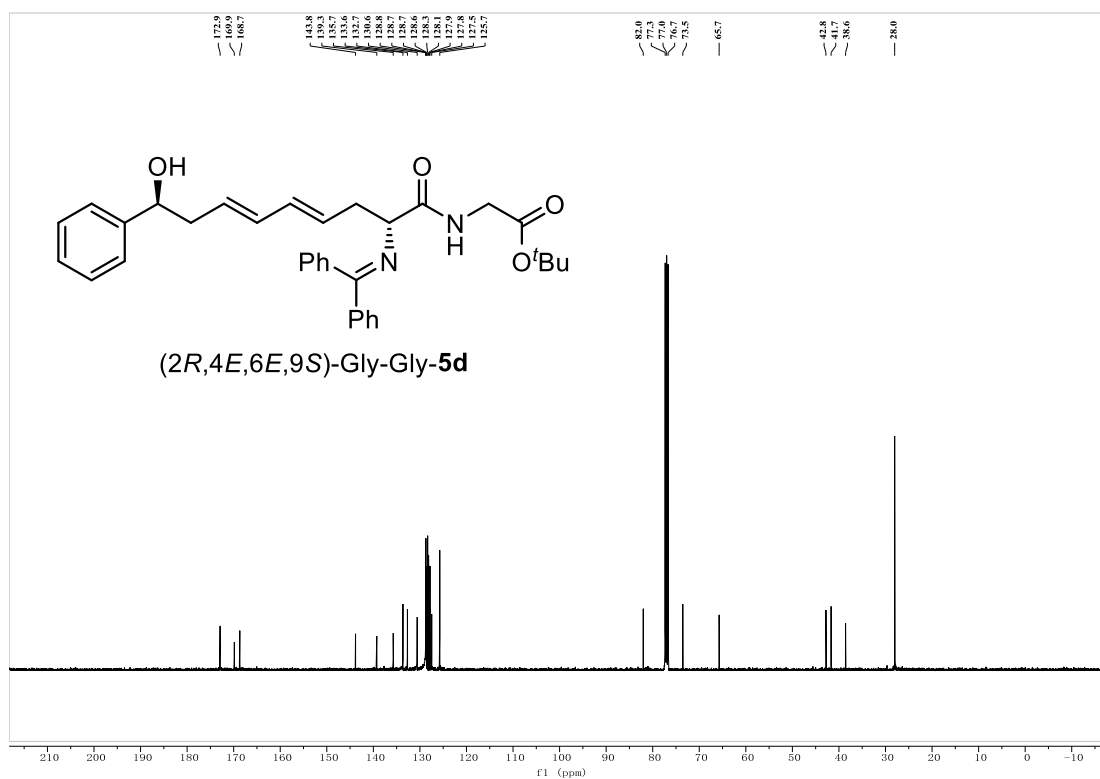

<sup>13</sup>C NMR (101 MHz, CDCl<sub>3</sub>) of (2*R*,4*E*,6*E*,9*S*)-Gly-Gly-5d



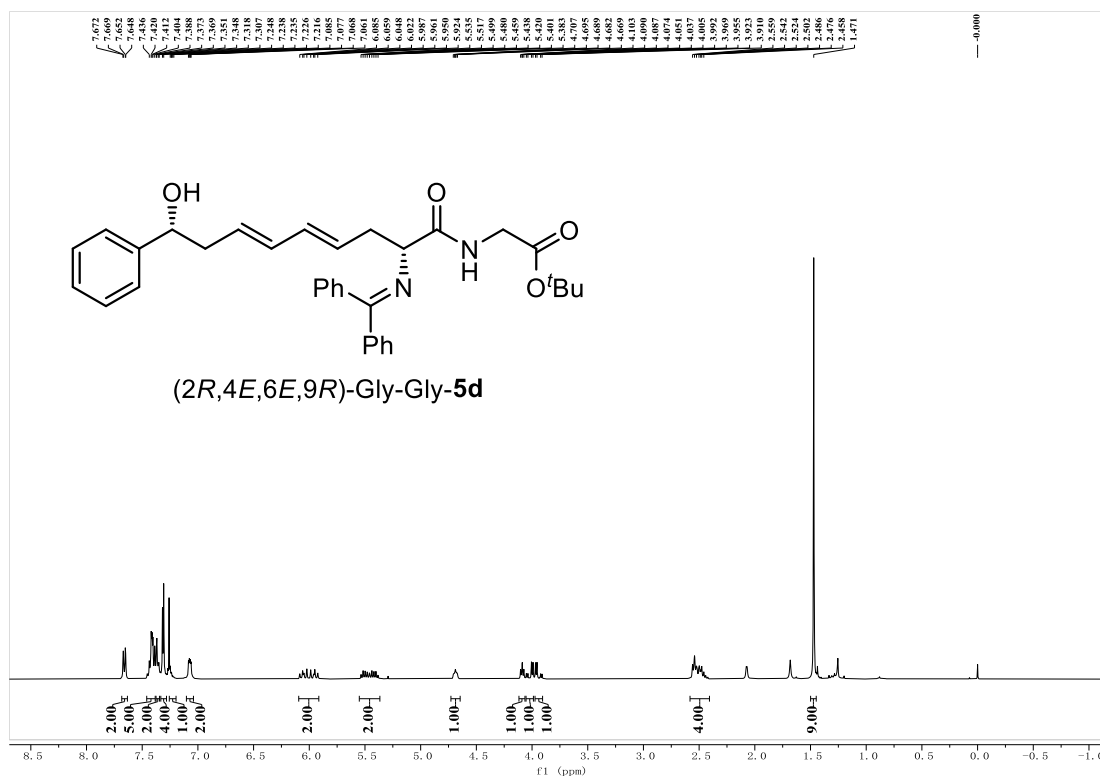

**<sup>1</sup>H NMR (400 MHz, CDCl<sub>3</sub>) of (2R,4E,6E,9R)-Gly-Gly-5d**

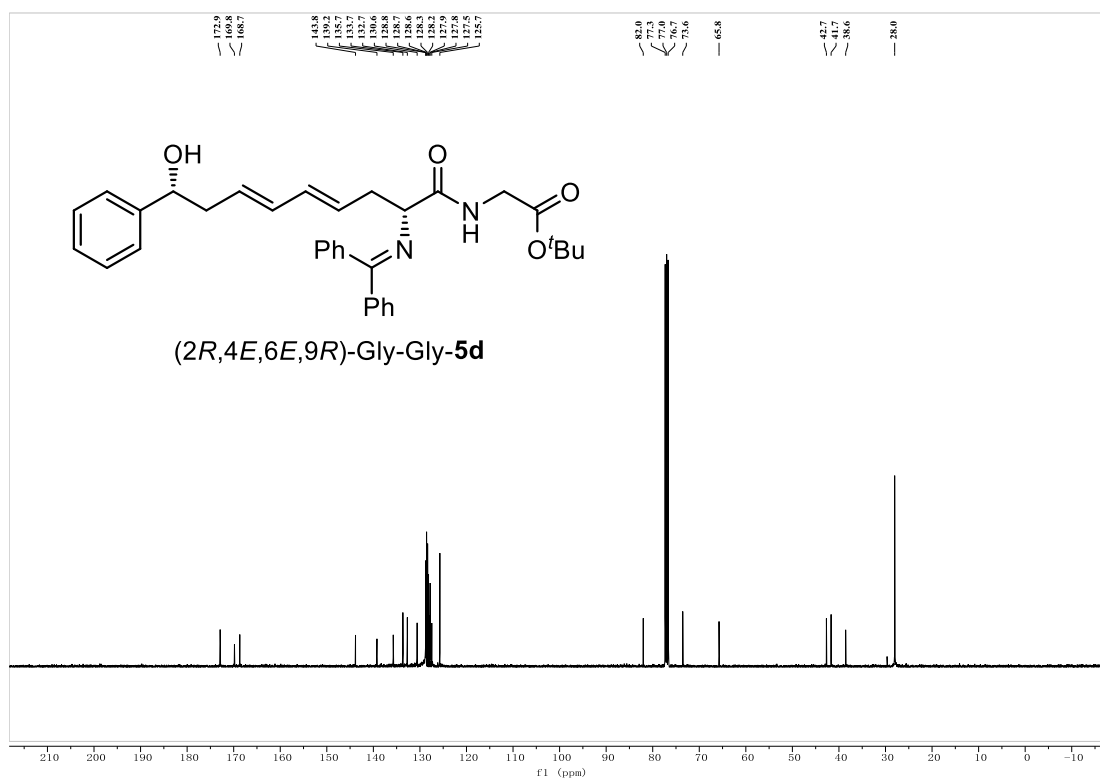

**<sup>13</sup>C NMR (101 MHz, CDCl<sub>3</sub>) of (2R,4E,6E,9R)-Gly-Gly-5d**

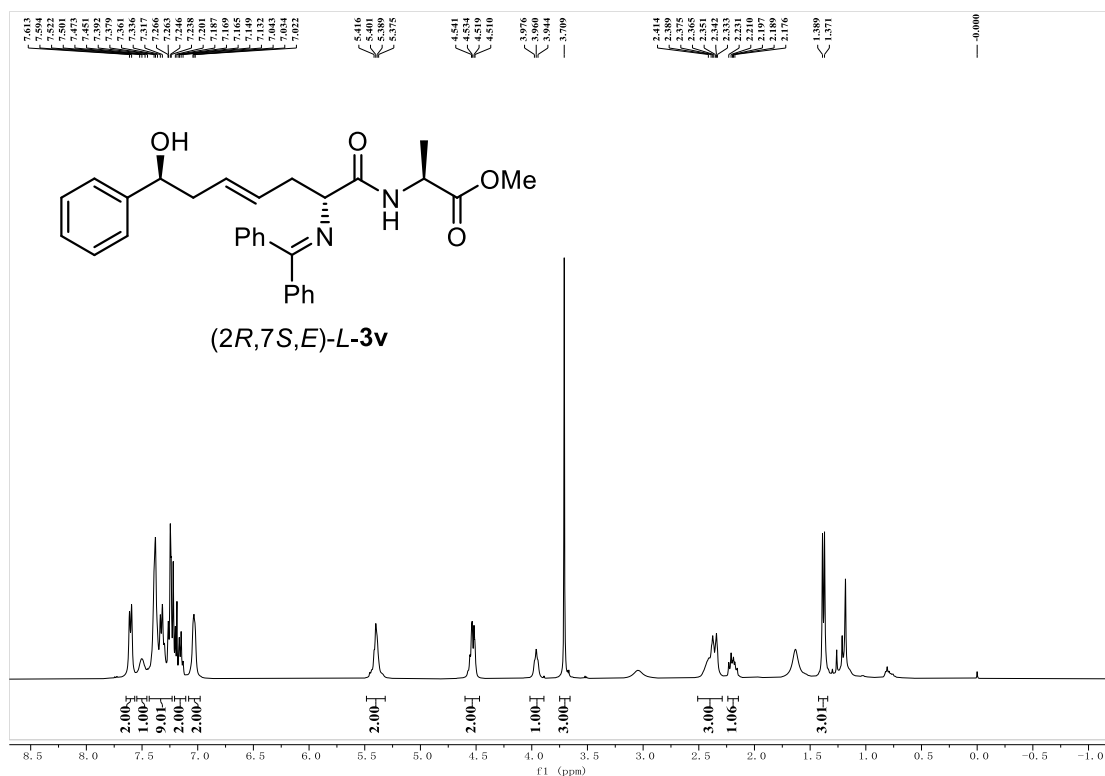

$^1\text{H NMR}$  (400 MHz,  $\text{CDCl}_3$ ) of  $(2R,7S,E)$ -L-3v

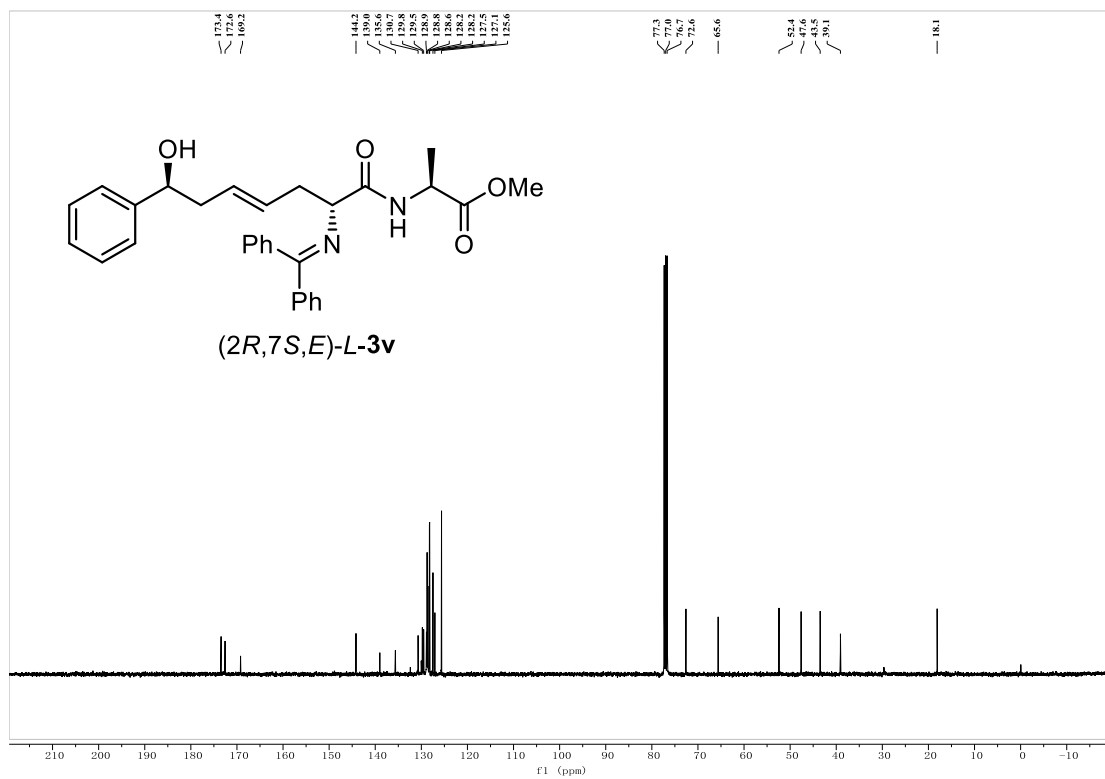

$^{13}\text{C NMR}$  (101 MHz,  $\text{CDCl}_3$ ) of  $(2R,7S,E)$ -L-3v

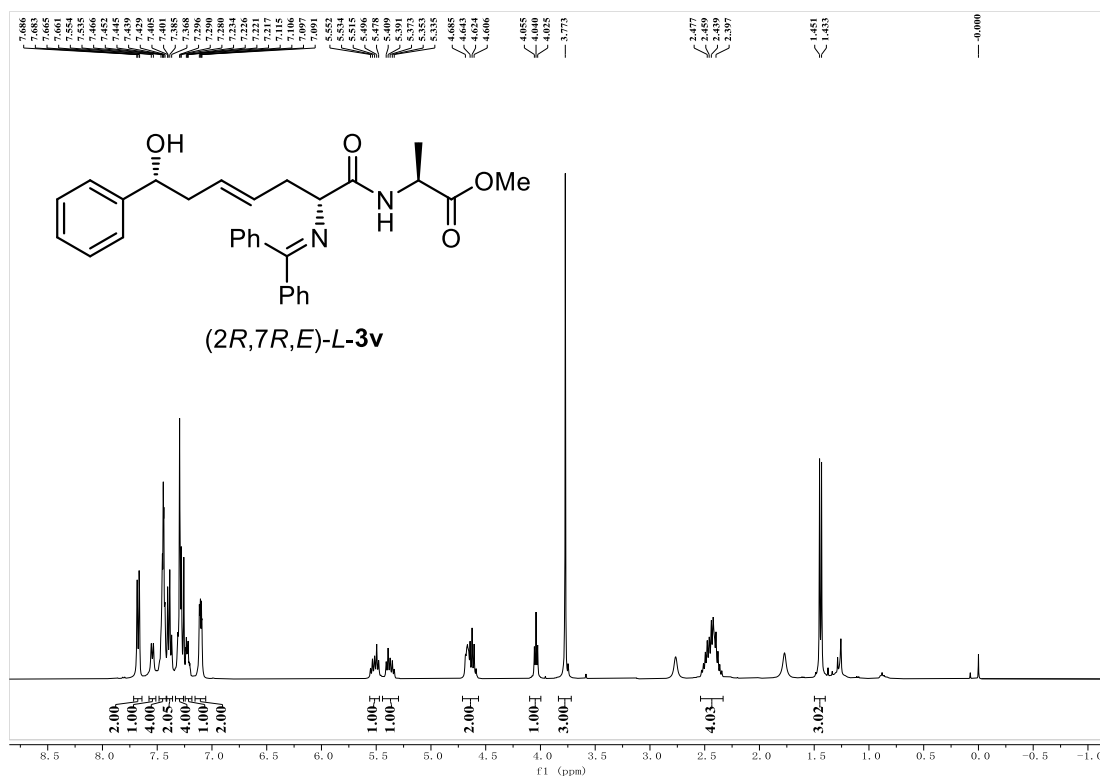

$^1\text{H}$  NMR (400 MHz,  $\text{CDCl}_3$ ) of **(2R,7R,E)-L-3v**

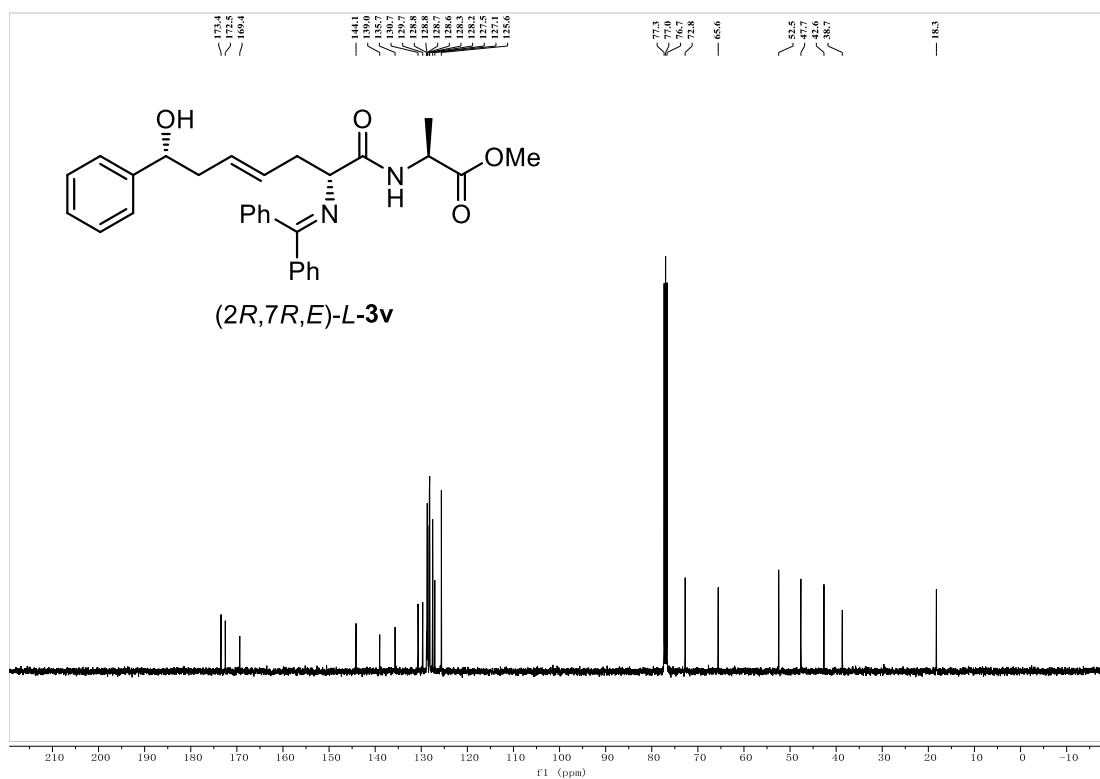

$^{13}\text{C}$  NMR (101 MHz,  $\text{CDCl}_3$ ) of **(2R,7R,E)-L-3v**

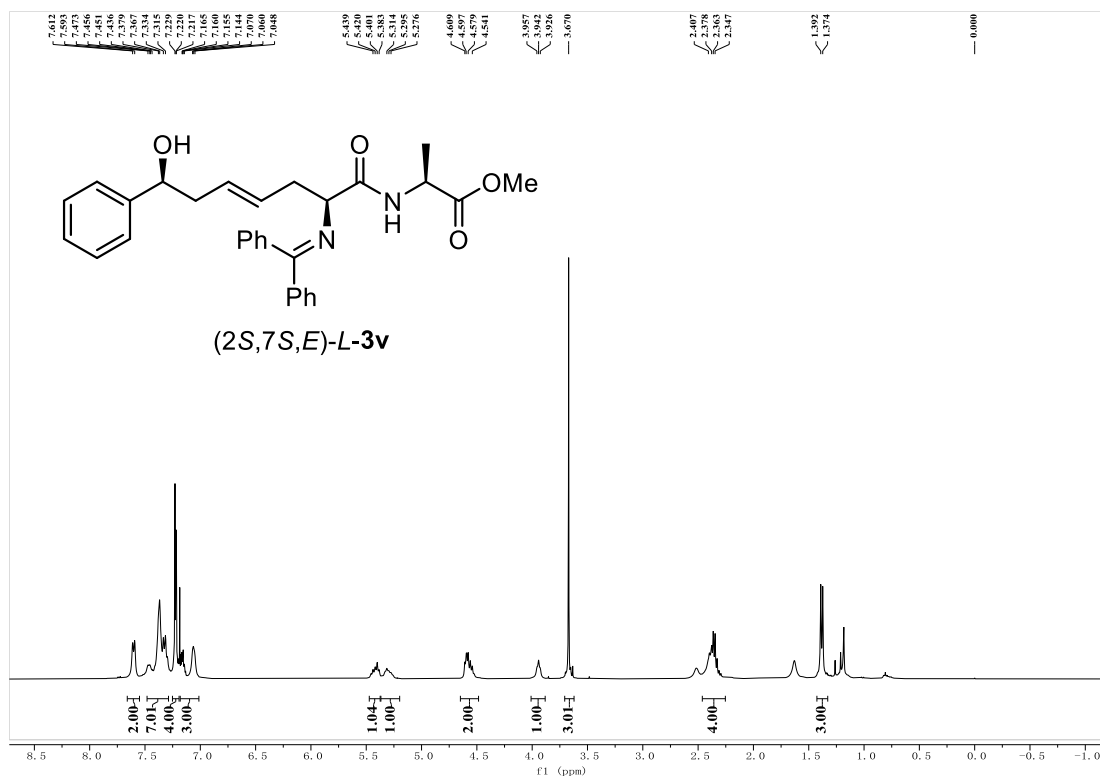

**<sup>1</sup>H NMR (400 MHz, CDCl<sub>3</sub>) of (2*S*,7*S*,*E*)-L-3v**

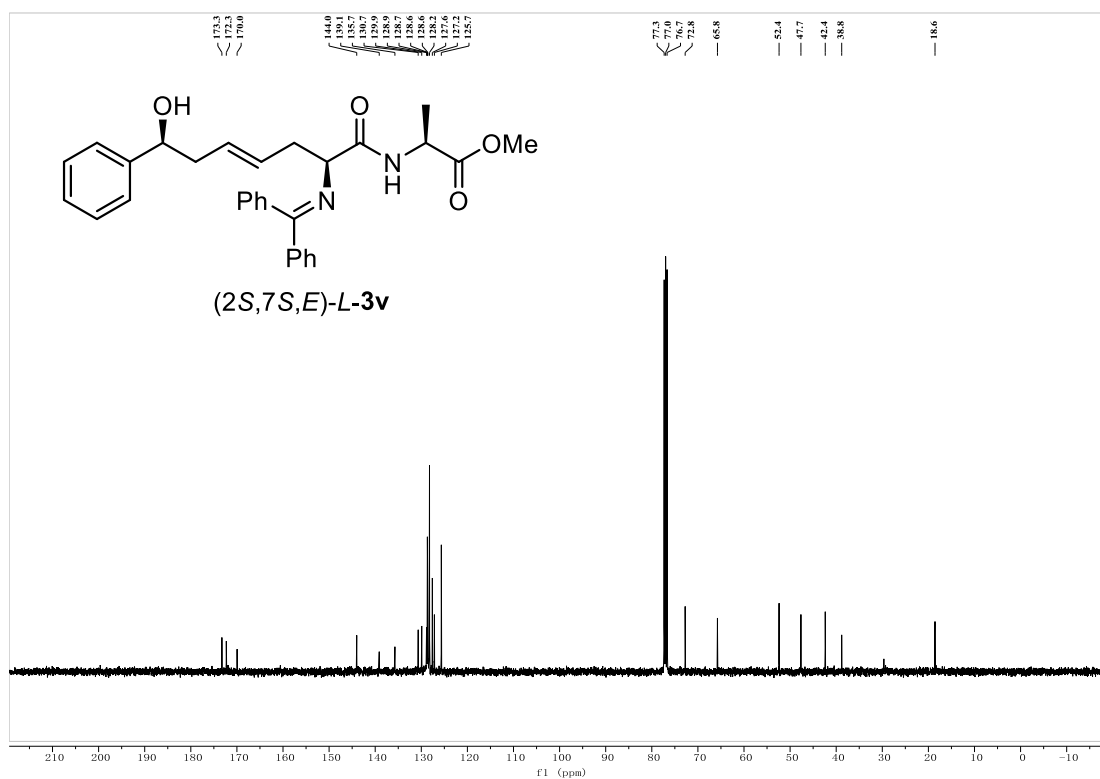

**<sup>13</sup>C NMR (101 MHz, CDCl<sub>3</sub>) of (2*S*,7*S*,*E*)-L-3v**

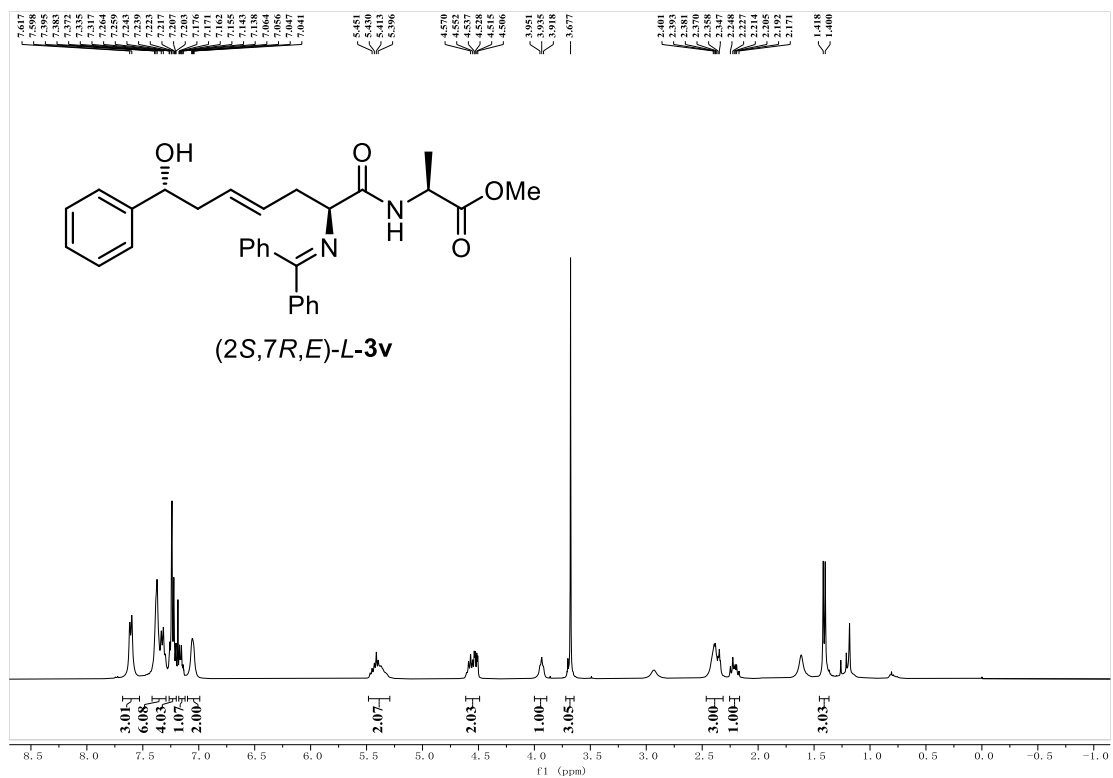

$^1\text{H NMR}$  (400 MHz,  $\text{CDCl}_3$ ) of  $(2S,7R,E)$ -L-3v

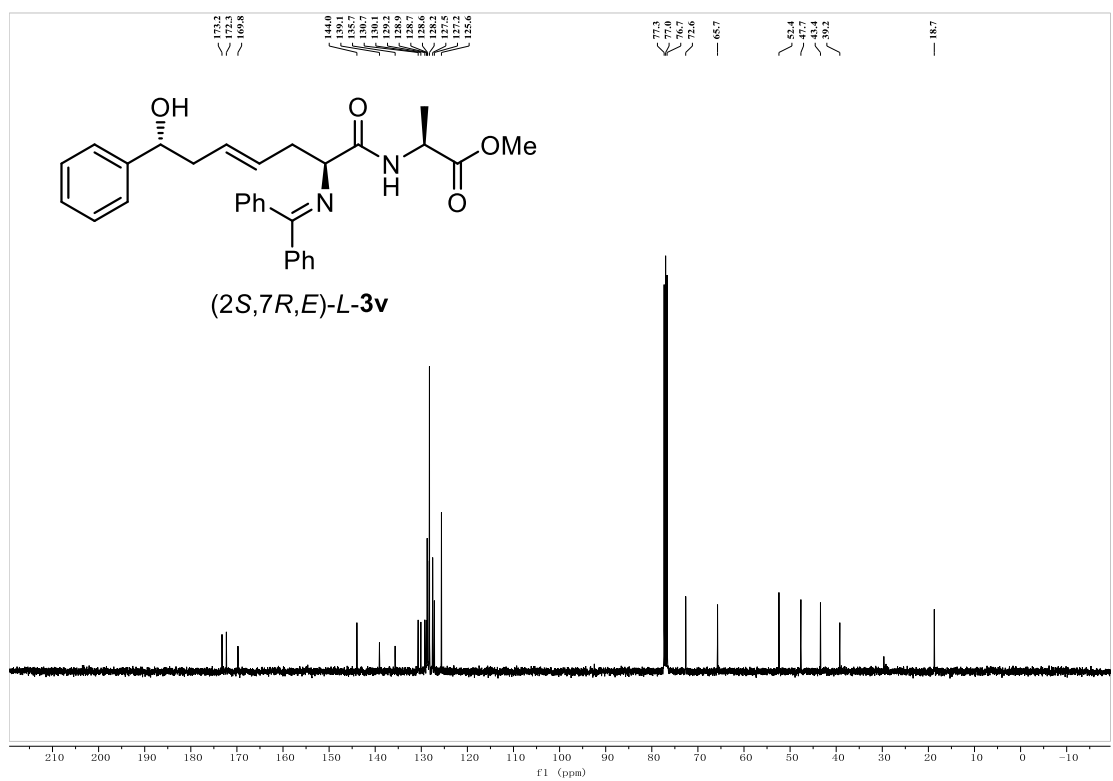

$^{13}\text{C NMR}$  (101 MHz,  $\text{CDCl}_3$ ) of  $(2S,7R,E)$ -L-3v

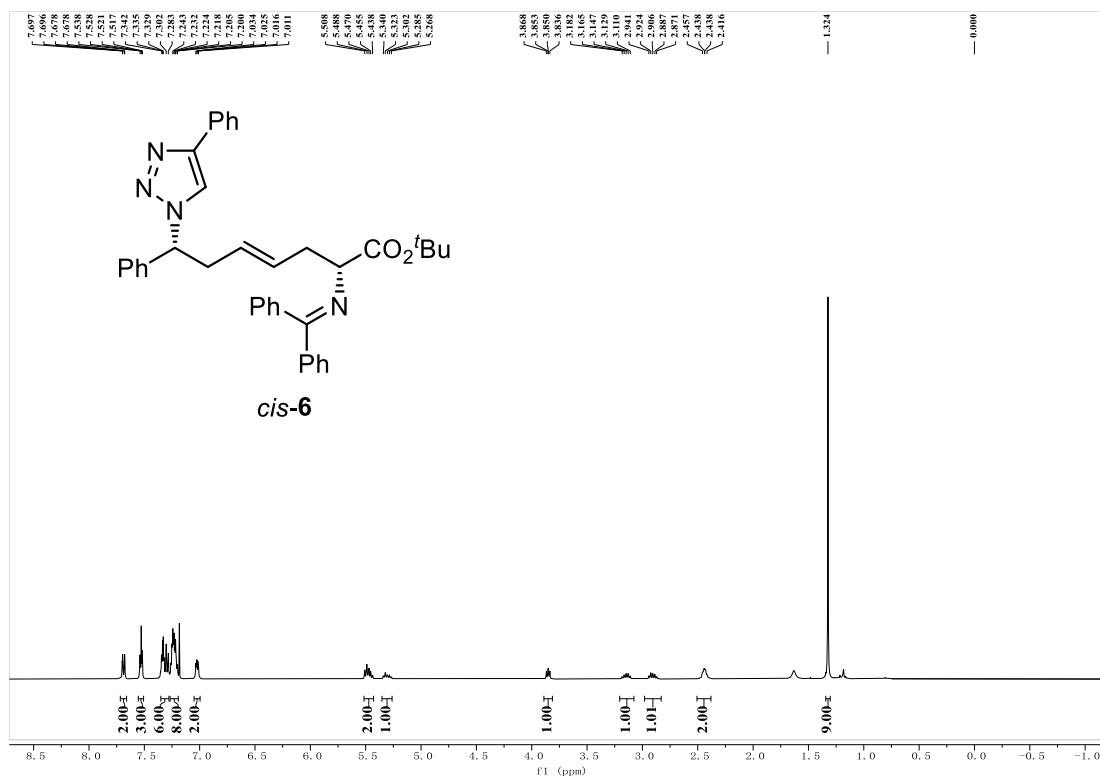

**<sup>1</sup>H NMR (400 MHz, CDCl<sub>3</sub>) of *cis*-6**

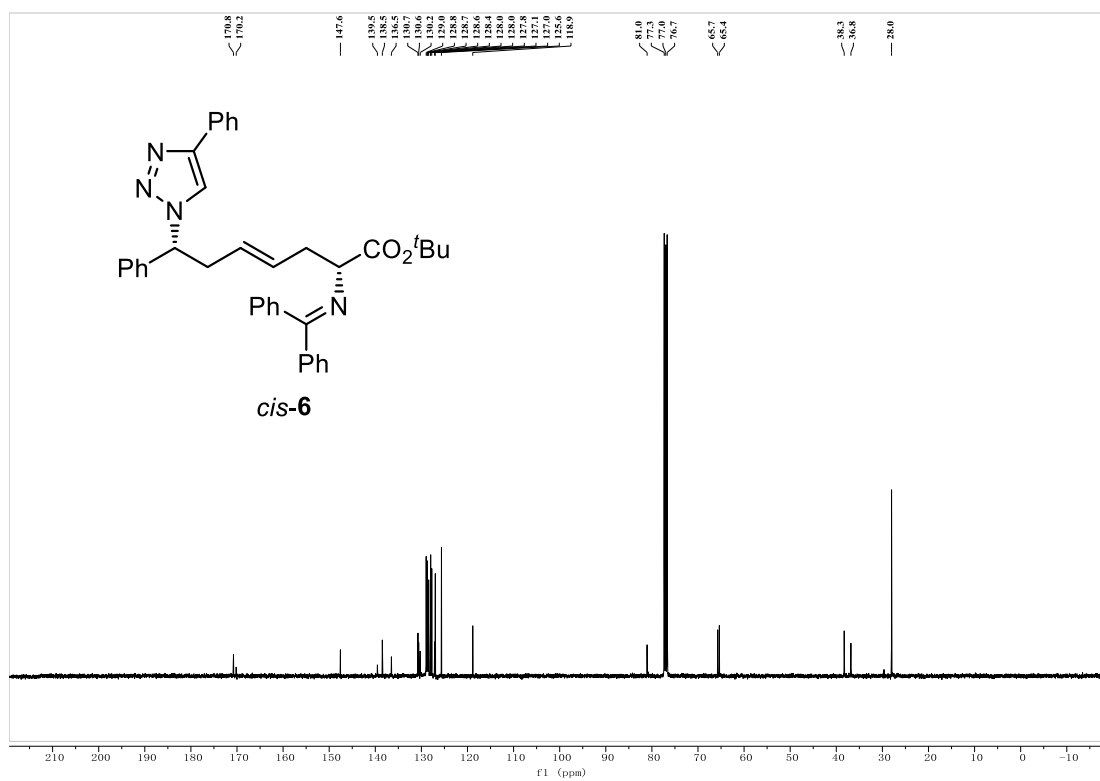

**<sup>13</sup>C NMR (101 MHz, CDCl<sub>3</sub>) of *cis*-6**

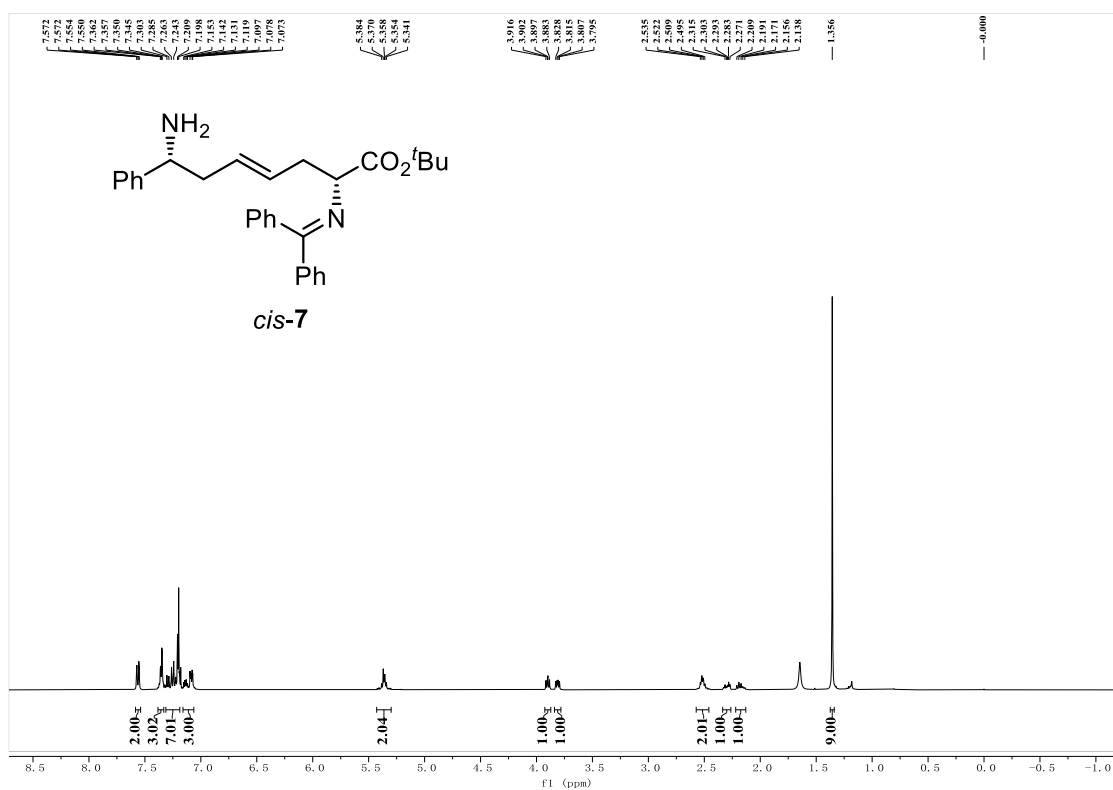

<sup>1</sup>H NMR (400 MHz, CDCl<sub>3</sub>) of *cis*-7

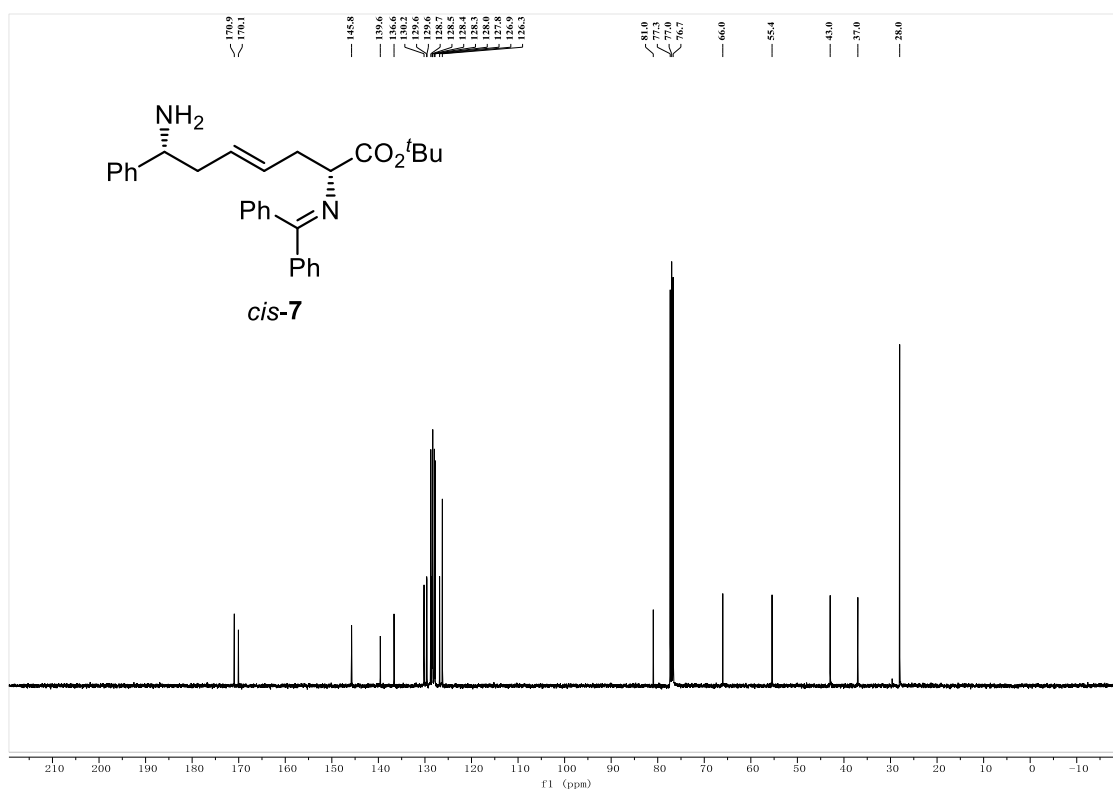

<sup>13</sup>C NMR (101 MHz, CDCl<sub>3</sub>) of *cis*-7

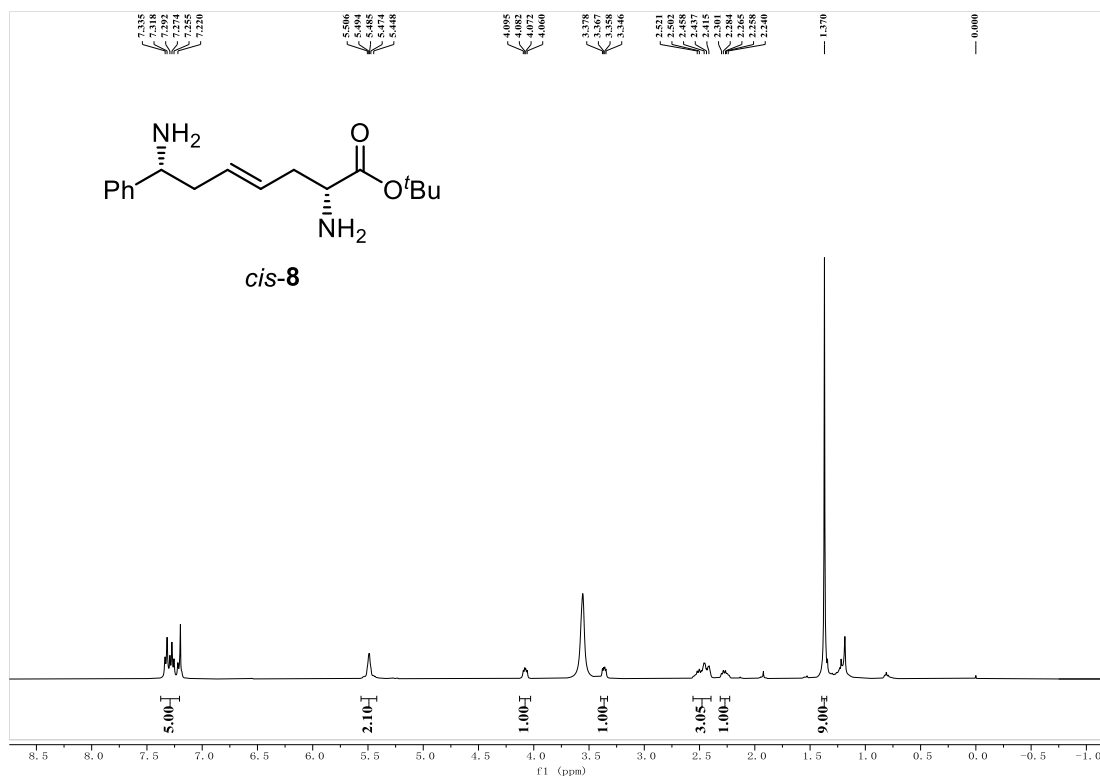

<sup>1</sup>H NMR (400 MHz, CDCl<sub>3</sub>) of *cis*-8

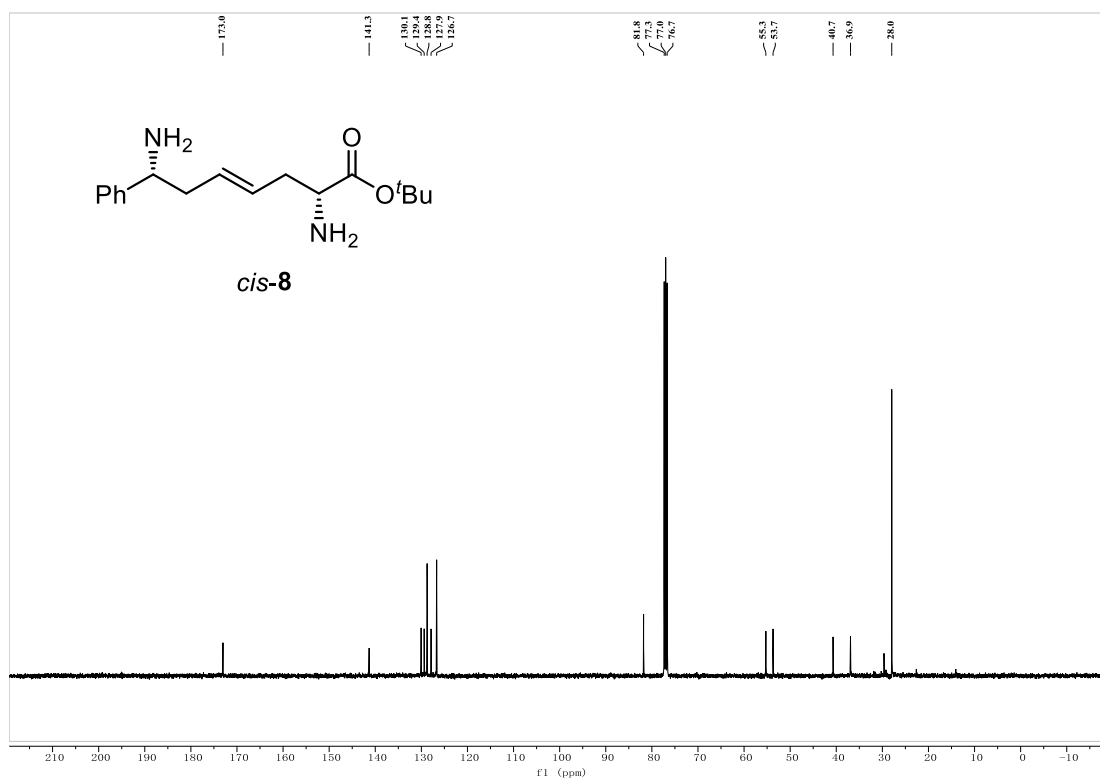

<sup>13</sup>C NMR (101 MHz, CDCl<sub>3</sub>) of *cis*-8



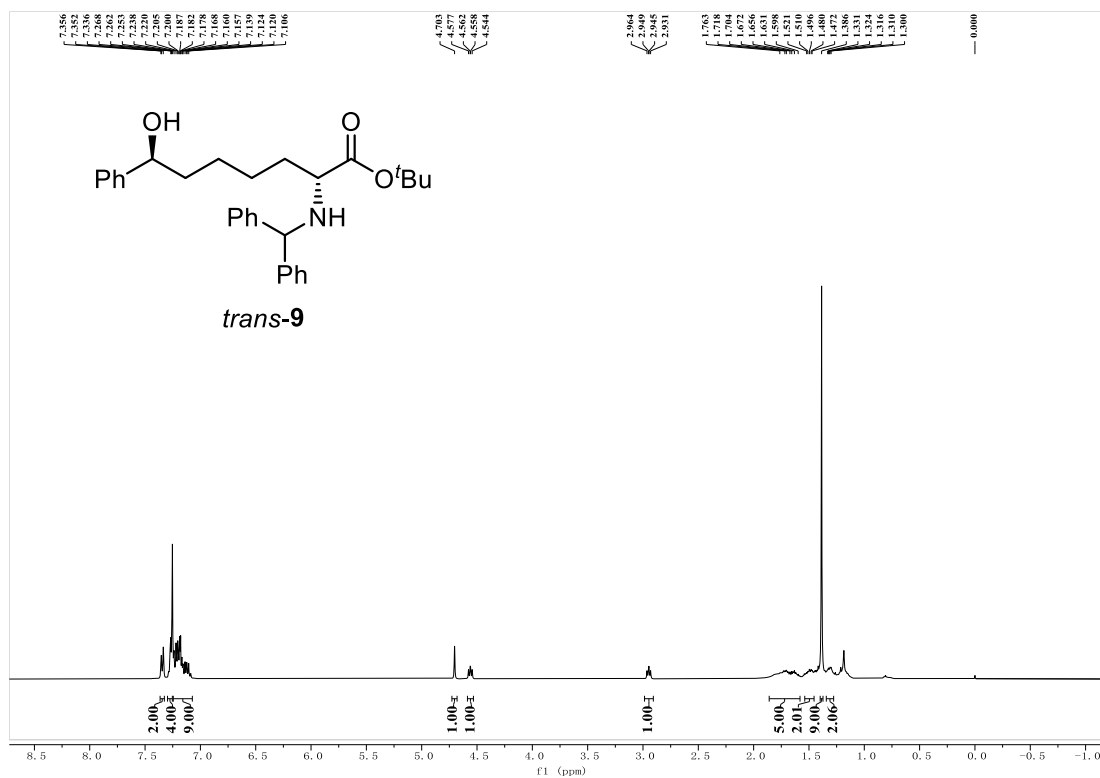

<sup>1</sup>H NMR (400 MHz, CDCl<sub>3</sub>) of *trans*-9

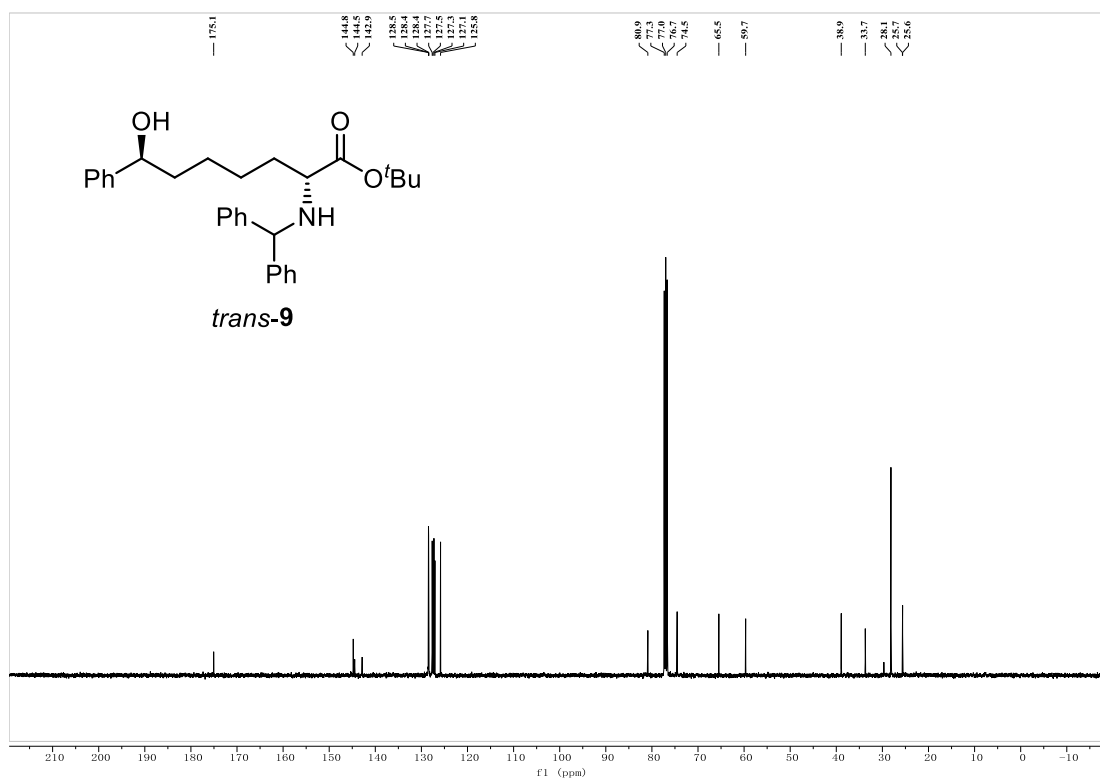

<sup>13</sup>C NMR (101 MHz, CDCl<sub>3</sub>) of *trans*-9

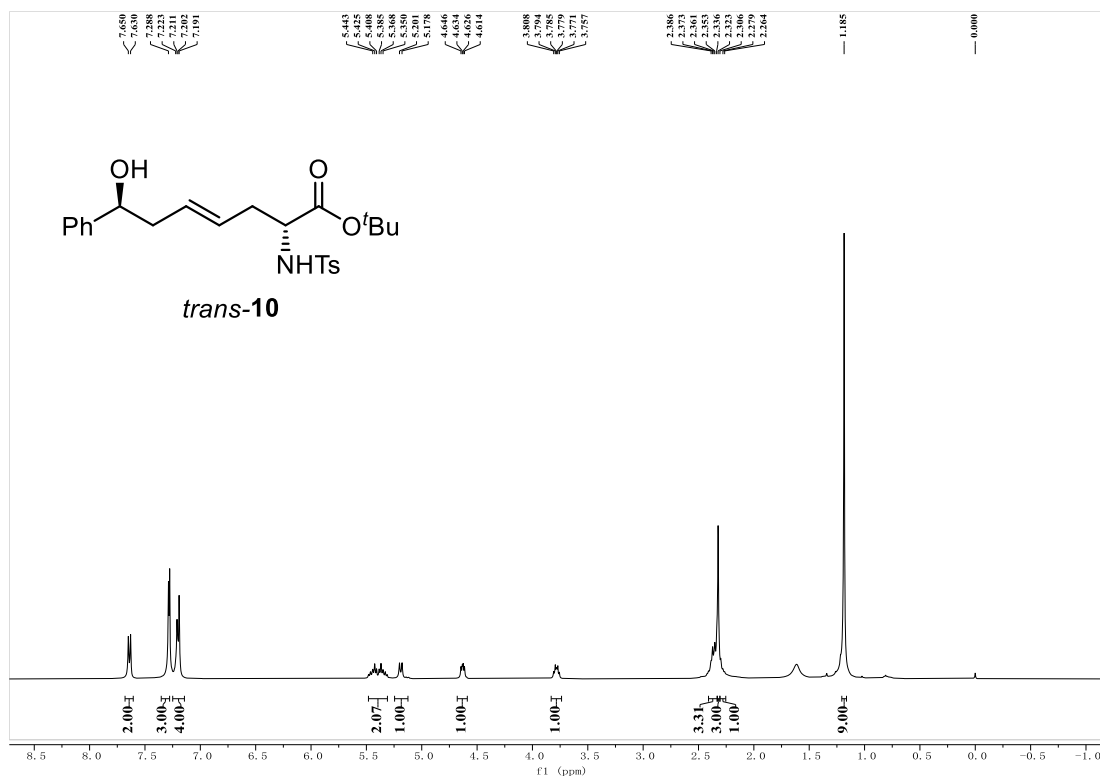

**<sup>1</sup>H NMR (400 MHz, CDCl<sub>3</sub>) of *trans*-10**

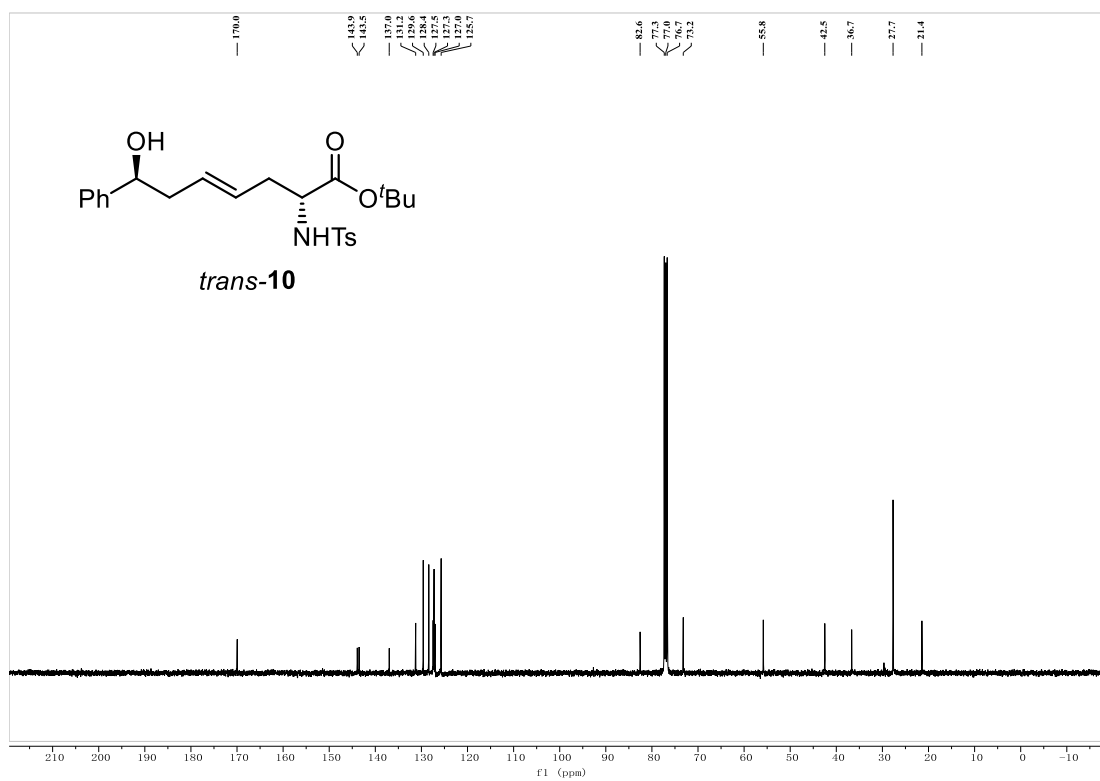

**<sup>13</sup>C NMR (101 MHz, CDCl<sub>3</sub>) of *trans*-10**

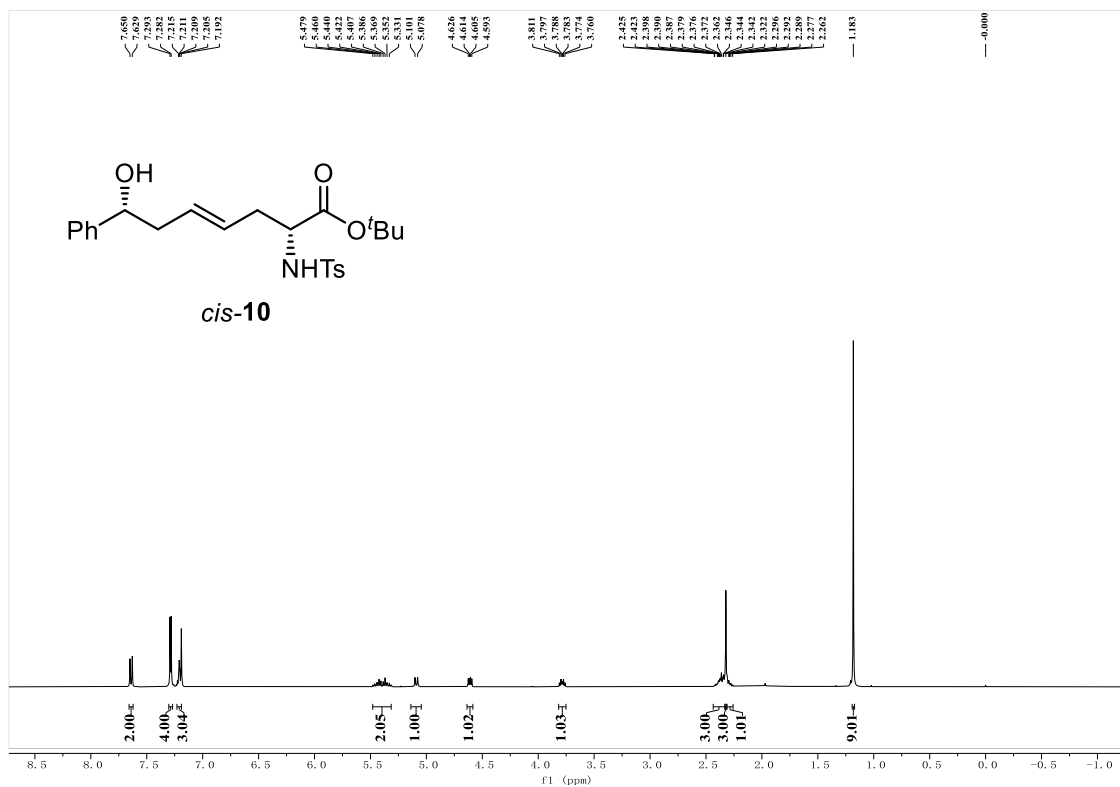

<sup>1</sup>H NMR (400 MHz, CDCl<sub>3</sub>) of *cis-10*

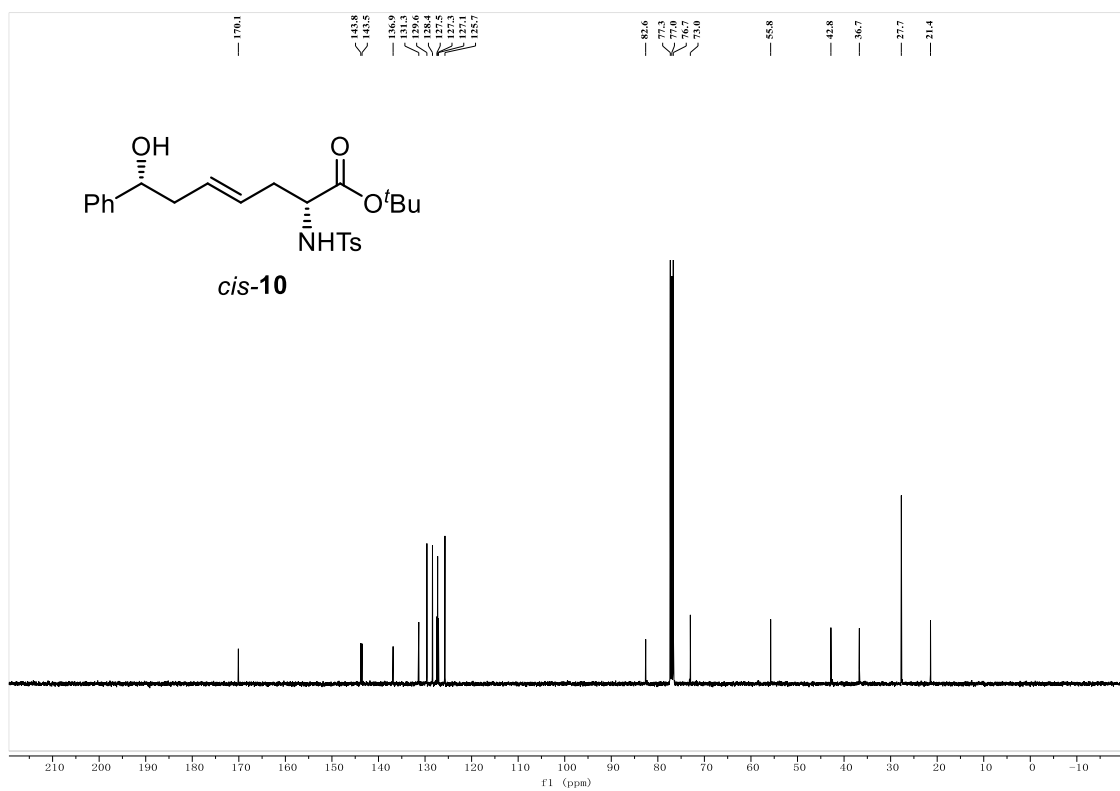

<sup>13</sup>C NMR (101 MHz, CDCl<sub>3</sub>) of *cis-10*

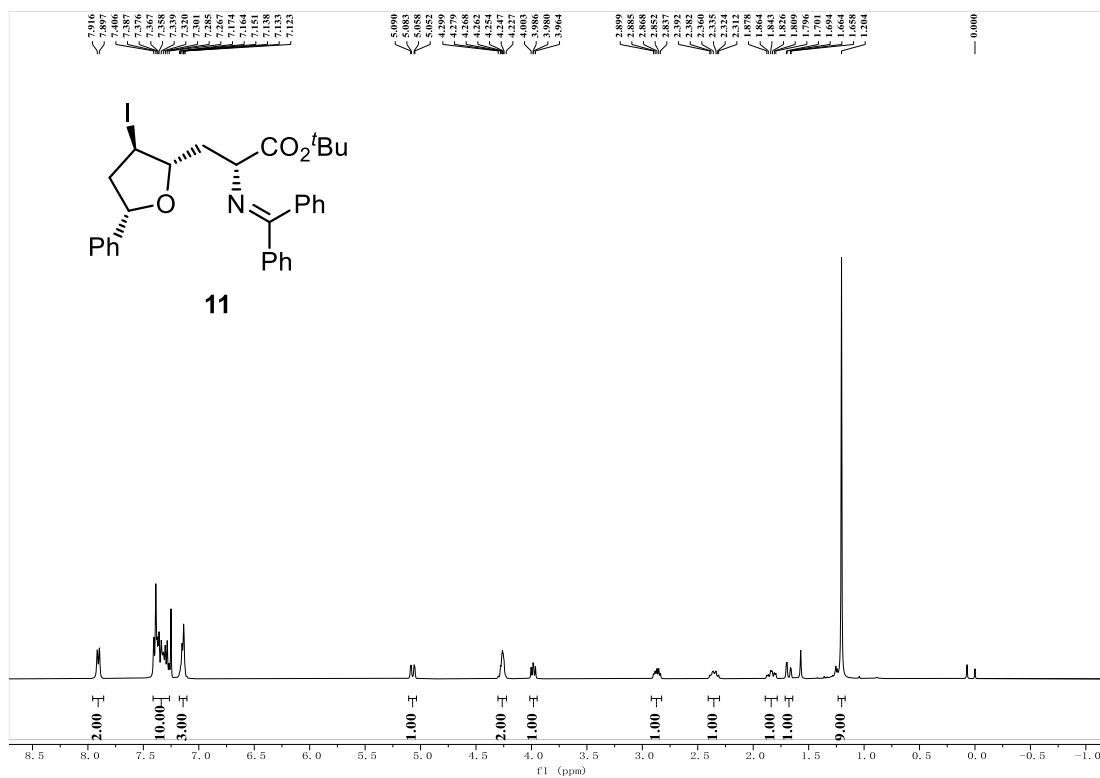

<sup>1</sup>H NMR (400 MHz, CDCl<sub>3</sub>) of **11**

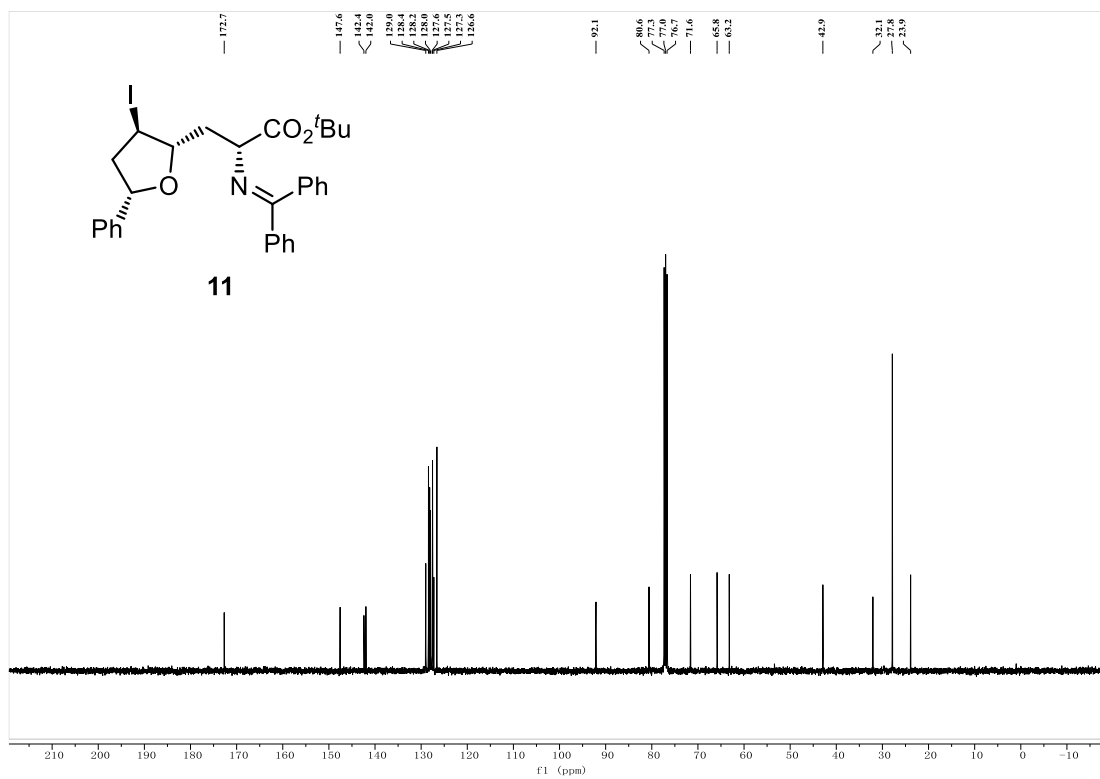

<sup>13</sup>C NMR (101 MHz, CDCl<sub>3</sub>) of **11**

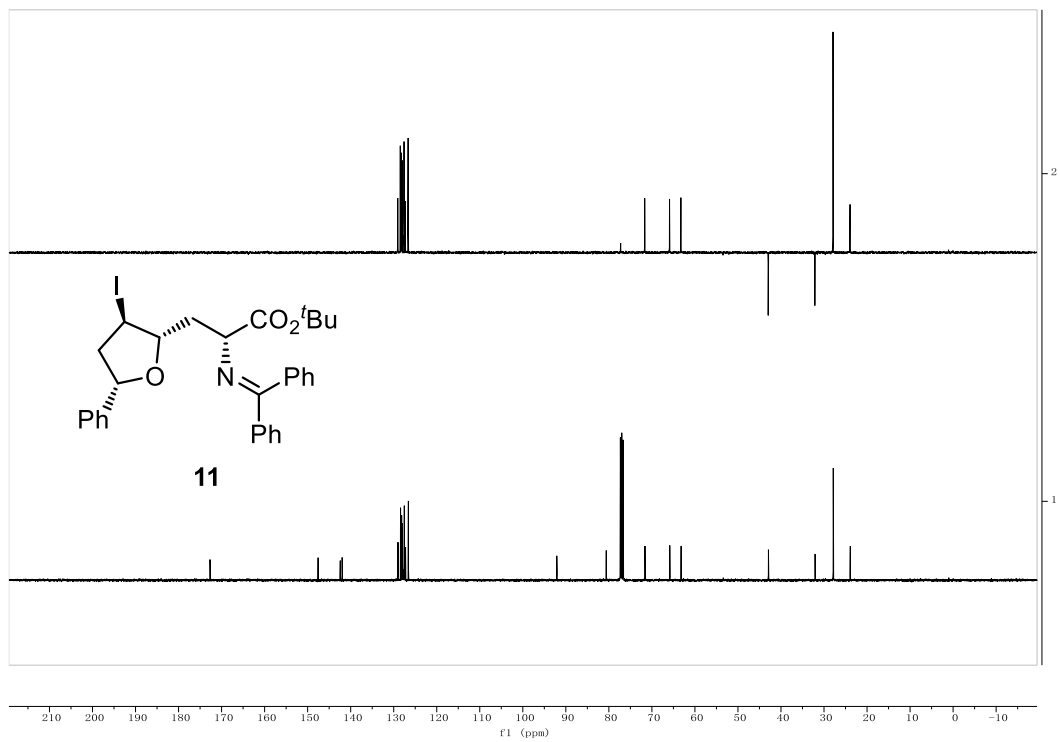

**DEPT135 spectrum of 11**

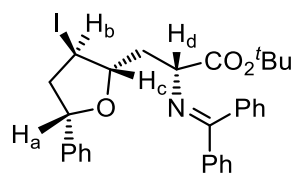

11

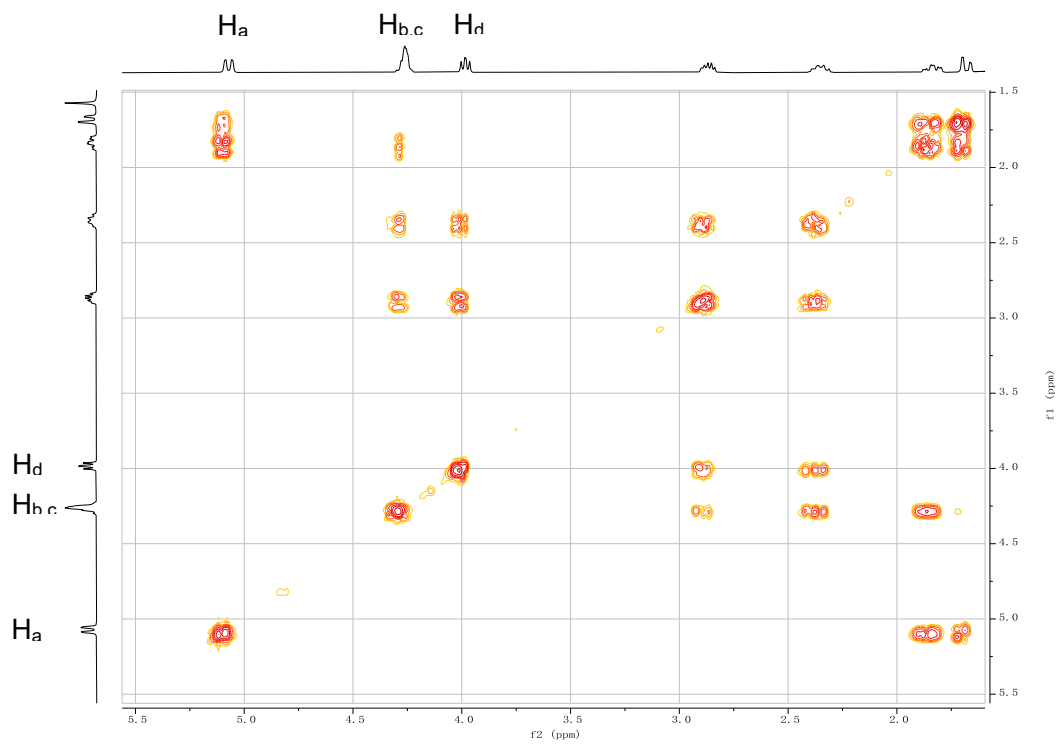

COESY spectrum of 11

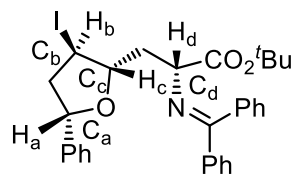

**11**

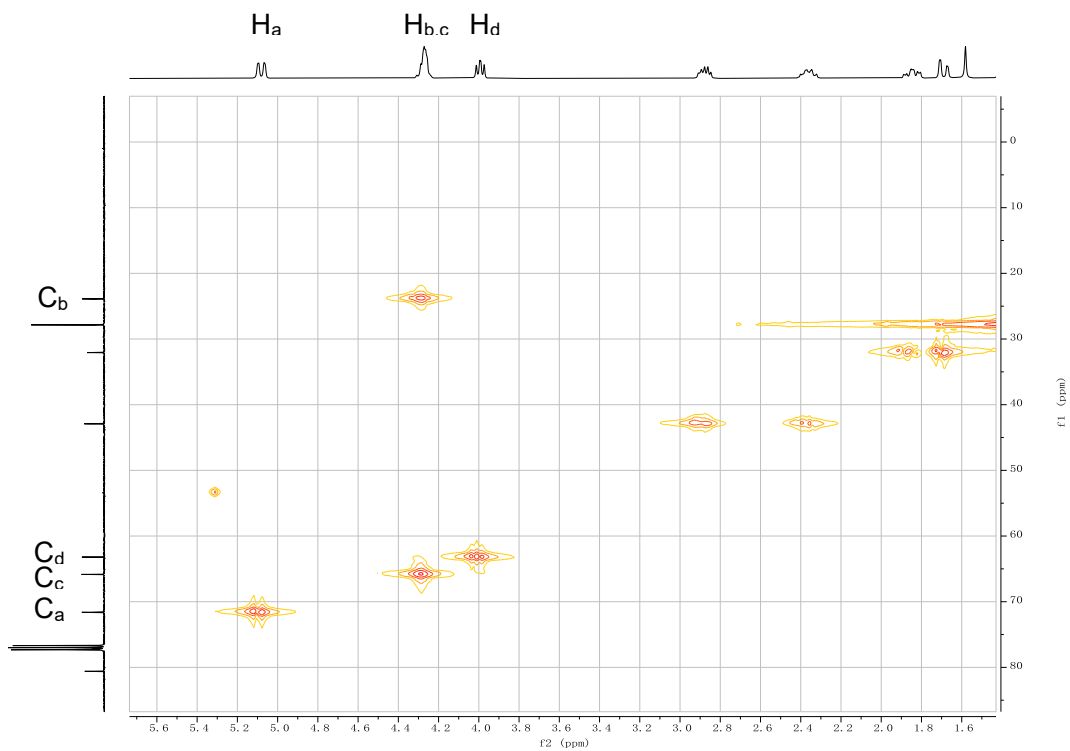

**HMQC spectrum of 11**

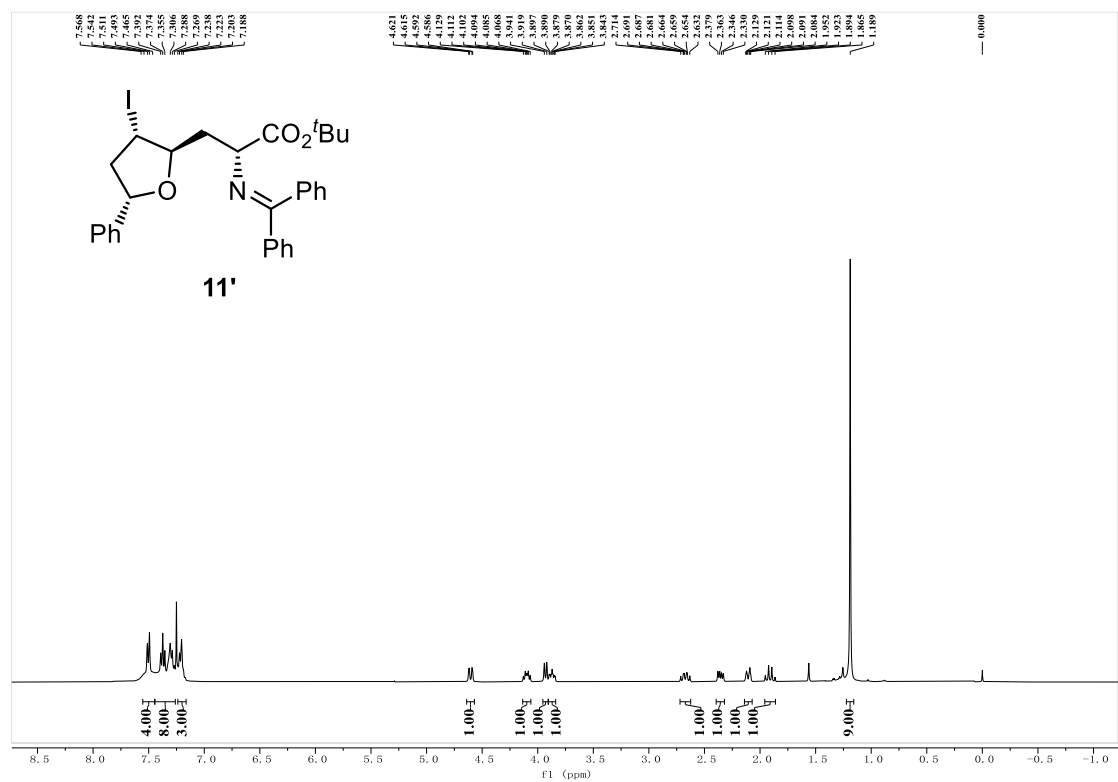

**<sup>1</sup>H NMR (400 MHz, CDCl<sub>3</sub>) of 11'**

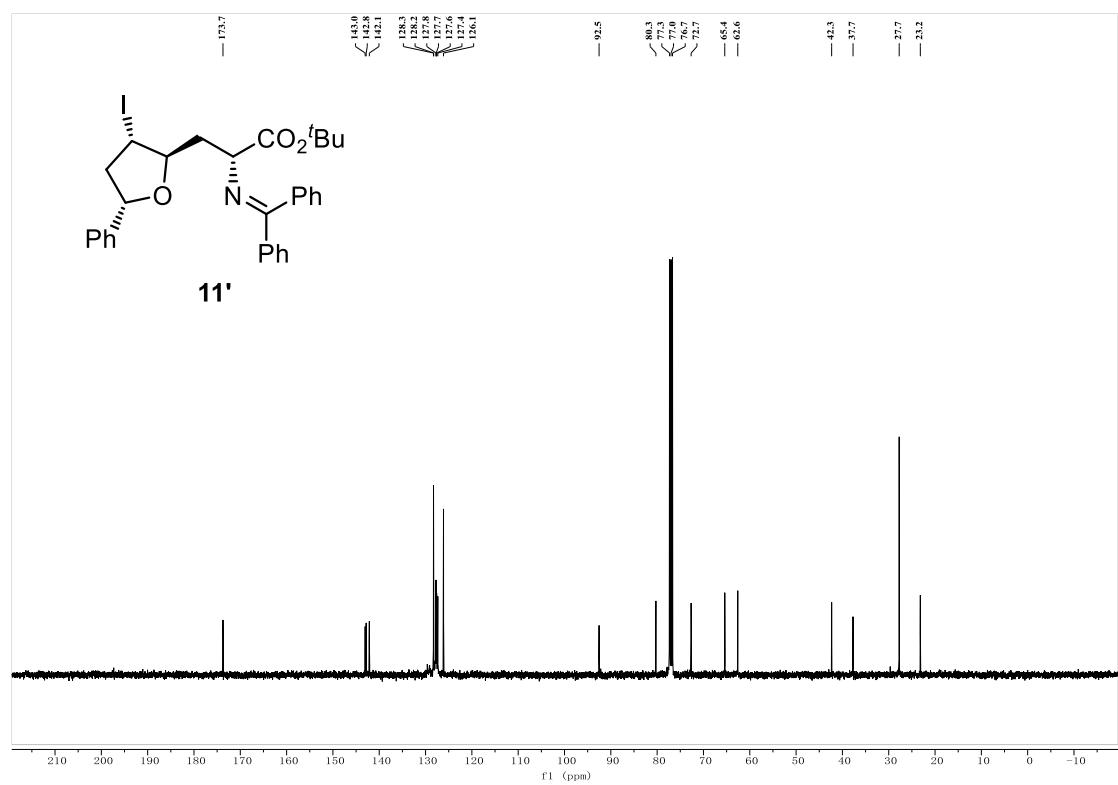

**<sup>13</sup>C NMR (101 MHz, CDCl<sub>3</sub>) of 11'**



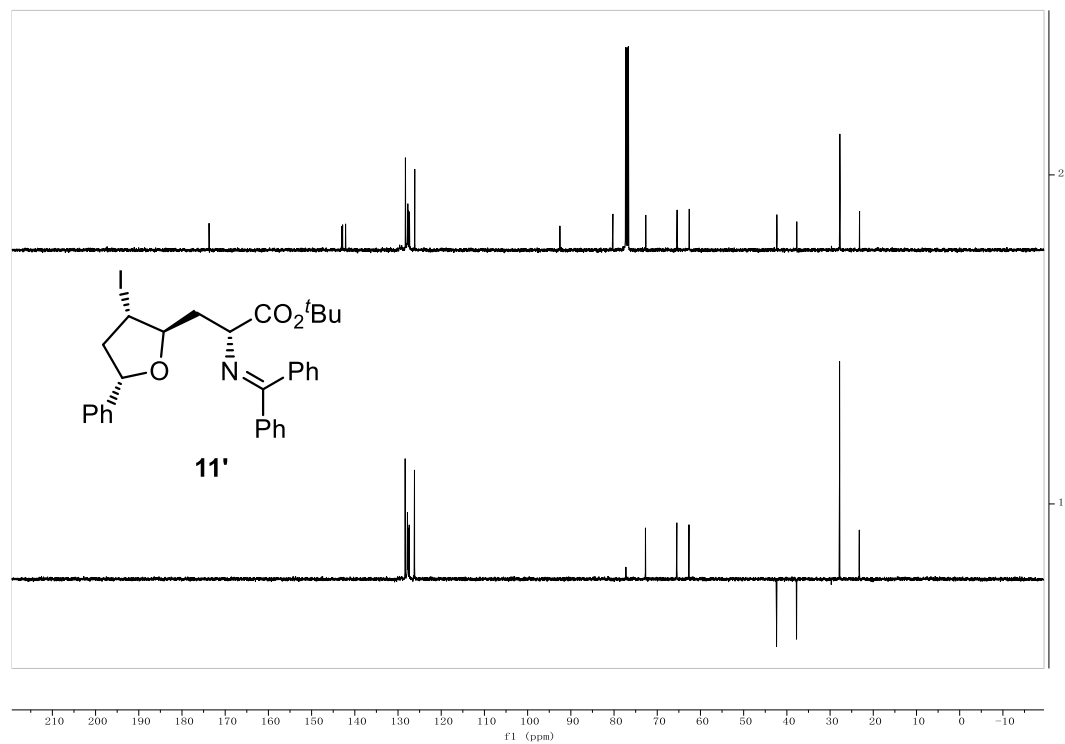

**DEPT135** spectrum of **11'**

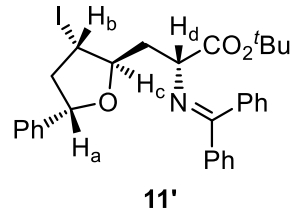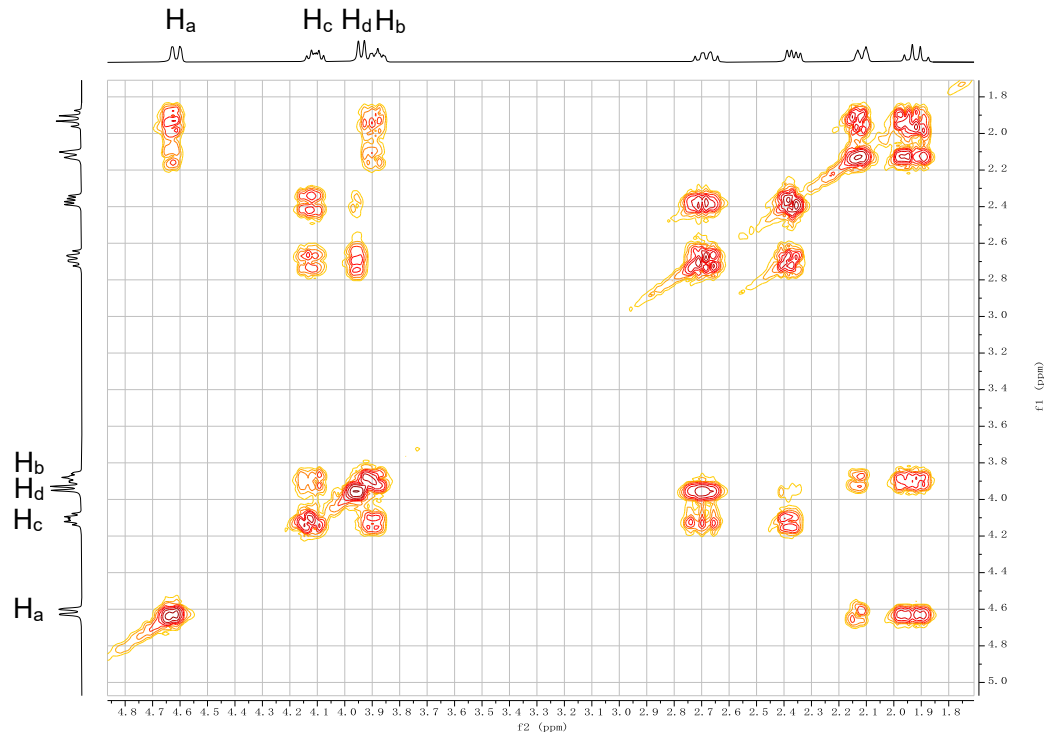

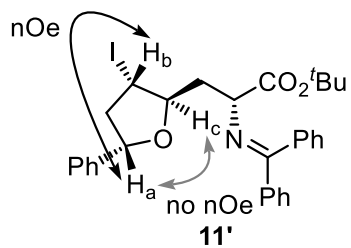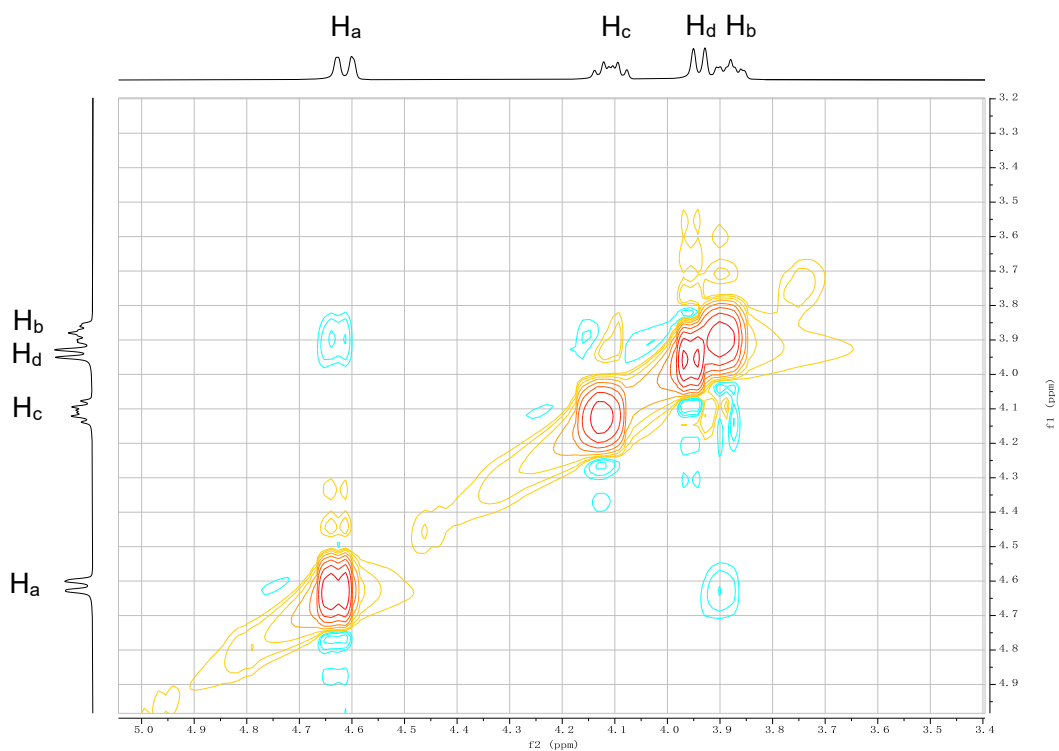

**NOESY spectrum of 11'**
